# Supplementary material for: The Active Sulfate-Reducing Microbial Community in Littoral Sediment of Oligotrophic Lake Constance
Source: Front Microbiol. 2019 Feb 13;10:247. doi: 10.3389/fmicb.2019.00247 (PMC6381063; doi:10.3389/fmicb.2019.00247)
Supplement: TABLE S1 — Overview of the total bacterial community at the phylum level (for Proteobacteria, class level) in initial littoral sediment of Lake Constance (Supplementary Table S1a) and the individual OTU level for each replicate and time point (Supplementary Table S1b). [file Table_1.XLSX]

## Sheet: Table S1a
			Relative abundance (% 16S rRNA gene amplicons)
	Domain	Phylum/Class (Proteobacteria)	mean		std
	Bacteria	Bacteria_unclassified	16.8341	±	0.952894
	Bacteria	Cyanobacteria/Chloroplast	13.0569	±	1.00204
	Bacteria	Chloroflexi	8.46712	±	0.192969
	Bacteria	Gammaproteobacteria	8.30699	±	0.541134
	Bacteria	Planctomycetes	7.76952	±	0.631631
	Bacteria	Betaproteobacteria	7.4593	±	0.483941
	Bacteria	Verrucomicrobia	7.24996	±	0.525629
	Bacteria	Deltaproteobacteria	7.01317	±	0.504273
	Bacteria	Bacteroidetes	6.97724	±	0.458989
	Bacteria	Alphaproteobacteria	3.93975	±	0.362936
	Bacteria	Acidobacteria	2.90672	±	0.248167
	Bacteria	Actinobacteria	2.31688	±	0.453635
	Bacteria	Ignavibacteriae	2.19091	±	0.167388
	Bacteria	Aminicenantes	1.01229	±	0.10126
	Bacteria	Parcubacteria	0.890116	±	0.0956482
	Bacteria	Firmicutes	0.806062	±	0.0593036
	Bacteria	Proteobacteria unclassified	0.540488	±	0.0441473
	Bacteria	Spirochaetes	0.480527	±	0.0329378
	Bacteria	Latescibacteria	0.351138	±	0.0427674
	Bacteria	candidate division ZB4	0.332826	±	0.0370538
	Bacteria	Gemmatimonadetes	0.159529	±	0.0196046
	Bacteria	Armatimonadetes	0.158034	±	0.0120633
	Bacteria	Hydrogenedentes	0.136053	±	0.0216678
	Bacteria	Candidatus Saccharibacteria	0.128815	±	0.0148761
	Bacteria	Deinococcus-Thermus	0.119474	±	0.0113625
	Bacteria	Lentisphaerae	0.088491	±	0.0115714
	Bacteria	Chlamydiae	0.0780803	±	0.0137148
	Bacteria	Deferribacteres	0.0709328	±	0.0110233
	Bacteria	BRC1	0.0430117	±	0.00768426
	Bacteria	Cloacimonetes	0.0410502	±	0.0120882
	Bacteria	SR2	0.0336636	±	0.00489213
	Bacteria	Elusimicrobia	0.0113386	±	0.00411386
	unknown	unclassified	0.00777194	±	0.00274948
	Bacteria	Fusobacteria	0.00712487	±	0.00208332
	Bacteria	Epsilonproteobacteria	0.00415475	±	0.00253314
	Bacteria	Nitrospirae	0.00400899	±	0.0021685
	Archaea	Archaea_unclassified	0.00336466	±	0.00207793
	Bacteria	Caldiserica	0.0014447	±	0.00168473
	Bacteria	Microgenomates	0.00108415	±	0.000949362
	Bacteria	Fibrobacteres	0.000625137	±	0.000730884

## Sheet: Table S1b
	Relative abundance (%)
OTU	DNA_0_days	DNA_09_days	DNA_21_days	DNA_43_days	DNA_0_days	DNA_09_days	DNA_21_days	DNA_43_days	DNA_0_days	DNA_09_days	DNA_21_days	DNA_43_days	DNA_0_days	DNA_09_days	DNA_21_days	DNA_43_days	DNA_0_days	DNA_09_days	DNA_21_days	DNA_43_days	DNA_0_days	DNA_09_days	DNA_21_days	DNA_43_days	DNA_0_days	DNA_09_days	DNA_21_days	DNA_43_days	DNA_0_days	DNA_09_days	DNA_21_days	DNA_43_days	DNA_0_days	DNA_09_days	DNA_21_days	DNA_43_days	DNA_0_days	DNA_09_days	DNA_21_days	DNA_43_days	DNA_0_days	DNA_09_days	DNA_21_days	DNA_43_days	DNA_0_days	DNA_09_days	DNA_21_days	DNA_43_days	RNA_0_days
	Chitin & sulfate_Replicate1	Chitin & sulfate_Replicate1	Chitin & sulfate_Replicate1	Chitin & sulfate_Replicate1	Chitin & sulfate_Replicate2	Chitin & sulfate_Replicate2	Chitin & sulfate_Replicate2	Chitin & sulfate_Replicate2	Chitin & sulfate_Replicate3	Chitin & sulfate_Replicate3	Chitin & sulfate_Replicate3	Chitin & sulfate_Replicate3	Chitin only_Replicate1	Chitin only_Replicate1	Chitin only_Replicate1	Chitin only_Replicate1	Chitin only_Replicate2	Chitin only_Replicate2	Chitin only_Replicate2	Chitin only_Replicate2	Chitin only_Replicate3	Chitin only_Replicate3	Chitin only_Replicate3	Chitin only_Replicate3	Sulfate only_Replicate1	Sulfate only_Replicate1	Sulfate only_Replicate1	Sulfate only_Replicate1	Sulfate only_Replicate2	Sulfate only_Replicate2	Sulfate only_Replicate2	Sulfate only_Replicate2	Sulfate only_Replicate3	Sulfate only_Replicate3	Sulfate only_Replicate3	Sulfate only_Replicate3	Control_Replicate1	Control_Replicate1	Control_Replicate1	Control_Replicate1	Control_Replicate2	Control_Replicate2	Control_Replicate2	Control_Replicate2	Control_Replicate3	Control_Replicate3	Control_Replicate3	Control_Replicate3	Chitin & sulfate_Replicate1
Otu0000001	2.26332	2.46743	1.97564	1.95551	2.39355	2.8238	2.23277	2.60028	2.66816	2.19315	2.36686	2.12645	2.11516	2.49982	2.17216	1.93345	2.80465	2.40235	2.01102	2.01466	2.2632	2.37213	2.34683	2.10905	2.55914	2.39334	2.03274	2.26278	2.65873	2.13974	2.45645	2.35328	2.3634	2.12005	1.91731	2.38215	2.35441	2.42737	2.24769	2.21117	2.56917	2.71554	2.2369	1.94082	2.31694	1.89418	1.9588	1.92046	3.31236
Otu0000002	1.3096	1.9189	1.70643	2.27873	1.42377	1.94614	2.0745	1.89138	1.68597	2.25822	2.19564	2.20142	1.4278	1.85534	1.73374	1.42769	1.33966	2.24427	1.93061	1.914	1.76852	2.05772	1.91616	1.716	1.49662	1.81622	2.02501	1.77896	1.46007	1.83317	1.8713	1.967	1.44162	1.73967	2.22745	2.18401	1.80671	1.77754	1.76736	1.69039	1.40676	2.11815	1.92331	1.90303	1.36439	1.81533	1.81736	1.67671	1.78636
Otu0000003	0.420297	0.335978	0.346586	0.427921	0.349351	0.31483	0.436847	0.507059	0.464697	0.344398	0.504365	0.362322	0.37247	0.396785	0.327706	0.447024	0.417351	0.497109	0.51292	0.336563	0.398716	0.357472	0.526789	0.502097	0.4217	0.242536	0.405345	0.448889	0.371466	0.43956	0.425876	0.441346	0.432579	0.476623	0.465207	0.444415	0.435438	0.296923	0.414352	0.332414	0.432251	0.266972	0.47222	0.467098	0.375584	0.424375	0.515941	0.55398	3.71891
Otu0000004	0.172832	0.132236	0.160044	0.162315	0.143366	0.161812	0.216313	0.167379	0.205465	0.17276	0.184566	0.150759	0.153846	0.1696	0.143925	0.186177	0.176431	0.256874	0.177443	0.136827	0.163371	0.163215	0.21471	0.198922	0.160411	0.129673	0.168321	0.161565	0.168535	0.174201	0.206976	0.19653	0.159664	0.175067	0.204362	0.156721	0.165194	0.147962	0.18287	0.166207	0.171343	0.12864	0.222583	0.225677	0.171178	0.186051	0.212603	0.240797	3.06597
Otu0000005	0.74475	0.704281	0.717549	0.734984	0.645145	0.653405	0.780838	0.586811	0.636557	0.732547	0.800947	0.620528	0.722447	0.632647	0.459452	0.682981	0.586482	0.803902	0.69868	0.49698	0.779153	0.667882	0.847606	0.698622	0.692911	0.583527	0.86737	0.745819	0.669842	1.0015	0.864529	0.841183	0.789039	0.824007	0.994085	0.694048	0.783468	0.555855	0.704861	0.542943	0.722366	0.429094	0.741533	0.805089	0.729016	0.702566	0.888664	0.985345	1.2254
Otu0000006	0.699971	0.653345	0.631697	0.604289	0.725892	0.736949	0.603567	0.806372	0.898669	0.761715	0.752774	0.693826	0.759334	0.79988	0.781622	0.613289	1.01357	0.844461	0.724557	0.610216	0.844272	0.838106	0.77021	0.75734	0.936009	0.80285	0.663838	0.694293	0.874493	0.738012	0.778502	0.792898	0.879082	0.702102	0.711674	0.734348	0.862055	0.84478	0.769676	0.892593	0.801223	0.904005	0.780885	0.637143	0.750161	0.709653	0.689404	0.737162	1.7338
Otu0000007	1.37637	1.40954	1.17224	1.17204	1.41883	1.59878	1.24301	1.46998	1.4805	1.3933	1.3204	1.22856	1.23977	1.29764	1.26986	1.11806	1.70469	1.38421	1.14414	1.0553	1.30582	1.40686	1.30199	1.23787	1.51977	1.36236	1.16021	1.31348	1.47383	1.20692	1.33044	1.20121	1.34694	1.20805	1.03311	1.23249	1.27424	1.43663	1.28935	1.34812	1.41942	1.52342	1.37608	1.10949	1.30095	1.14555	1.16442	1.04739	0.107592
Otu0000008	0.0219968	0.0117543	0.020138	0.0168639	0.0230703	0.0158295	0.0221589	0.0275683	0.0259232	0.02468	0.0179923	0.010828	0.0179937	0.0157767	0.0143925	0.014934	0.020685	0.0239195	0.0277254	0.0235908	0.0285613	0.0230304	0.0299596	0.0299581	0.0289402	0.0200112	0.019752	0.0209598	0.0326752	0.01998	0.0238491	0.0194836	0.0176373	0.0210814	0.0143773	0.0257469	0.0192459	0.0209945	0.0219907	0.0283168	0.012656	0.0202652	0.0184461	0.0230925	0.027187	0.0177192	0.025797	0.0177274	3.35671
Otu0000009	0.960791	0.877657	1.00584	0.852329	0.82394	0.88645	0.902184	0.900892	0.838182	1.05227	0.86305	0.856246	0.965362	0.984468	0.939939	1.02447	0.924743	1.06598	0.991645	1.00969	0.885401	0.929227	1.00614	1.02097	0.865726	0.866885	1.00134	1.03838	0.834938	0.957168	0.925855	1.04025	0.975623	1.04765	1.09267	0.980623	0.882905	0.968748	1.00579	1.1142	0.951148	0.905767	1.05143	1.30578	0.9012	1.07733	1.12884	1.07103	0.273498
Otu0000010	0.470575	0.605348	0.60626	0.929621	0.577582	0.54084	0.657381	0.861509	0.599113	0.574371	0.773088	0.881233	0.447144	0.574273	0.658732	0.599351	0.503742	0.643746	0.668182	0.663689	0.516388	0.650859	0.714036	0.620731	0.525058	0.597935	0.702484	0.958037	0.521944	0.658716	0.735062	0.975874	0.604311	0.698435	0.806153	0.924651	0.662379	0.682822	0.663194	0.693145	0.549076	0.647606	0.575518	0.675981	0.604157	0.653838	0.61646	0.652958	0.795033
Otu0000011	1.33159	0.710158	1.01962	0.857247	1.06453	0.672752	1.06574	0.916645	1.21839	1.013	0.971003	0.805437	1.20018	0.903218	0.838085	1.01252	1.17905	1.10862	1.18387	0.75648	1.13331	0.968278	1.15219	0.94308	1.34283	0.584327	0.906015	0.785992	1.00605	1.03459	0.948852	0.98011	1.00162	1.06598	1.18099	0.90674	1.10022	0.710815	1.00231	0.822417	1.12346	0.642319	1.2076	1.02657	1.01196	1.06581	1.09682	1.13455	0.42462
Otu0000012	1.55863	0.931531	1.04506	0.928216	1.47073	1.15115	1.30843	0.660654	0.917872	1.37311	1.20606	0.628025	1.31714	1.14066	1.06061	0.83033	1.17418	0.947419	1.28738	0.559889	1.5206	1.26167	0.938733	1.13122	1.22955	0.727607	1.14991	0.703899	1.485	0.80045	1.16094	0.858126	1.53445	1.28321	1.33195	0.80823	1.32235	1.04873	0.90162	1.12528	1.55766	0.885502	1.08586	0.872267	1.35835	1.31033	0.951822	1.55705	0.0558494
Otu0000013	0.740037	0.784602	0.820358	0.774333	0.566871	0.623505	0.715416	0.738436	0.57703	0.662995	0.62915	0.72631	0.720648	0.748606	0.741766	0.763625	0.672872	0.729024	0.751359	0.836688	0.671762	0.724957	0.740251	0.74296	0.533327	0.740415	0.816702	0.895157	0.543441	0.847278	0.697585	0.830171	0.711992	0.823091	0.858528	0.710839	0.662379	0.752804	0.81713	0.807643	0.695107	0.753337	0.762439	0.915303	0.759223	0.892161	0.859308	0.774094	0.124019
Otu0000014	0.341737	0.278186	0.275573	0.353439	0.305682	0.271739	0.326053	0.306205	0.312998	0.292795	0.328504	0.304017	0.291498	0.274515	0.267921	0.305649	0.301758	0.353592	0.357658	0.239054	0.388434	0.300397	0.327058	0.32115	0.312554	0.244137	0.293703	0.285577	0.319014	0.364635	0.326221	0.335457	0.375954	0.337302	0.336839	0.342546	0.375295	0.274929	0.291667	0.278243	0.349501	0.250231	0.344327	0.366331	0.34739	0.323375	0.325576	0.344206	0.569171
Otu0000015	0.458791	0.547556	0.00847916	0.534023	0.518259	0.00879415	0.00422074	0.539551	0.00768093	0.486869	0.00464317	0.010828	0.34188	0.47488	0.00553557	0.396249	0.53051	0.507509	0.0120143	0.0125818	0.510676	0.00200264	0.453138	0.402636	0.0107492	0.00720403	0.00601147	0.00436662	0.516785	0.493881	0.591968	0.00423557	0.440933	0.00733266	0.0112964	0.673898	0.00561338	0.00899766	0.47338	0.00615582	0.42349	0.551566	0.00491896	0.00419864	0.450097	0.00708767	0.00533732	0.419547	0.778606
Otu0000016	0.254535	0.232148	0.219398	0.245229	0.278492	0.238321	0.315501	0.304236	0.351403	0.282698	0.314575	0.234052	0.233018	0.302913	0.197066	0.340495	0.281073	0.357752	0.264316	0.185581	0.273046	0.271358	0.3333	0.346315	0.369608	0.25054	0.277387	0.279464	0.257103	0.296578	0.275968	0.302419	0.35646	0.312554	0.332731	0.251872	0.25581	0.235939	0.25	0.23269	0.341712	0.209701	0.325881	0.297054	0.254753	0.271104	0.387845	0.360456	0.689083
Otu0000017	0.304813	0.264473	0.246955	0.453217	0.411146	0.215457	0.315501	0.400725	0.452215	0.338789	0.434717	0.306516	0.300495	0.354188	0.406311	0.4978	0.338261	0.489829	0.450076	0.363299	0.411283	0.445588	0.503071	0.502097	0.391933	0.246538	0.356394	0.446269	0.404141	0.451424	0.428431	0.438805	0.490132	0.419795	0.446722	0.475759	0.521243	0.30692	0.435185	0.384123	0.48969	0.363893	0.370152	0.440857	0.351418	0.412857	0.553302	0.503752	0.569992
Otu0000018	0.218397	0.241943	0.155805	0.276849	0.238119	0.276136	0.255355	0.313097	0.324519	0.252409	0.354042	0.276531	0.184435	0.231129	0.259064	0.259851	0.243353	0.292233	0.297586	0.209172	0.213639	0.268354	0.295851	0.316357	0.251366	0.199312	0.256776	0.280337	0.252803	0.284715	0.27682	0.280394	0.232999	0.267642	0.236198	0.321277	0.264631	0.247936	0.237269	0.217916	0.228782	0.180625	0.245948	0.259266	0.21951	0.250726	0.352263	0.310229	0.441046
Otu0000019	0.16969	0.00391811	0.169583	0	0.206809	0.00527649	0.145616	0.00196916	0.177622	0.17276	0.163672	0.14826	0.17274	0.19642	0.148353	0.1583	0.00243353	0.00415991	0.192229	0.00471817	0.204499	0.00300396	0.176012	0.17855	0.173641	0.211318	0	0.0034933	0.167676	0.204795	0.00511052	0.178741	0.200509	0.00274975	0.136584	0	0.230149	0.213944	0.157407	0.184674	0.199576	0.00264329	0.00245948	0.168995	0.215483	0	0.000889553	0.00590912	0.521535
Otu0000020	0.278889	0.312469	0.30419	0.355547	0.260365	0.313072	0.257465	0.310143	0.312038	0.347764	0.304708	0.314012	0.299595	0.260316	0.23028	0.256865	0.261605	0.306793	0.23659	0.229618	0.282186	0.331437	0.247166	0.312762	0.262116	0.308973	0.307444	0.397363	0.260542	0.352148	0.351774	0.432875	0.385237	0.355634	0.382024	0.37501	0.347228	0.352908	0.326389	0.424751	0.333924	0.29781	0.319732	0.350586	0.34739	0.299454	0.270424	0.407729	0.583955
Otu0000021	0.268676	0.230189	0.258614	0.375221	0.27602	0.258548	0.287011	0.335742	0.292836	0.287185	0.257116	0.309015	0.344579	0.249272	0.293385	0.272794	0.254304	0.282874	0.319766	0.316117	0.369012	0.327432	0.31083	0.370282	0.264596	0.288161	0.308303	0.427056	0.293217	0.297827	0.324518	0.401532	0.368528	0.326303	0.339919	0.379488	0.40256	0.301922	0.332176	0.45553	0.331977	0.323362	0.293908	0.383126	0.323224	0.273761	0.33892	0.35307	0.279247
Otu0000022	0.215255	0.282104	0.190781	0.212204	0.215872	0.269101	0.184658	0.24713	0.252511	0.207536	0.200237	0.180744	0.185335	0.248483	0.20703	0.164274	0.255521	0.209035	0.182064	0.207599	0.239915	0.2273	0.20722	0.179748	0.205062	0.256143	0.181203	0.223571	0.239045	0.203546	0.219752	0.229568	0.215361	0.173234	0.185877	0.223886	0.264631	0.251934	0.202546	0.219147	0.247279	0.294286	0.215205	0.172144	0.202392	0.195797	0.185027	0.178751	0.585597
Otu0000023	0.106842	0.0950142	0.0551145	0.095562	0.115352	0.0958562	0.0886356	0.117165	0.106573	0.0942327	0.105632	0.0741302	0.0863698	0.110437	0.0797122	0.109516	0.121677	0.0977578	0.0868729	0.0676271	0.100536	0.0911203	0.113597	0.122229	0.12651	0.0792444	0.0893133	0.0951923	0.113503	0.104271	0.113283	0.0855584	0.114179	0.115489	0.107829	0.111943	0.107456	0.0969748	0.0810185	0.0947996	0.128507	0.0881096	0.102068	0.0913204	0.103714	0.106315	0.125427	0.104887	0.69319
Otu0000024	0.338594	0.478989	0.557505	0.498187	0.407851	0.416843	0.487496	0.417463	0.296676	0.387027	0.459674	0.46144	0.345479	0.27767	0.347634	0.374345	0.295674	0.421191	0.457469	0.591344	0.380437	0.422558	0.379488	0.413421	0.313381	0.477868	0.513552	0.628794	0.389523	0.494505	0.535752	0.600603	0.242281	0.480289	0.531959	0.544044	0.346426	0.445884	0.445602	0.441988	0.240464	0.373585	0.327111	0.475496	0.310134	0.428804	0.385176	0.379661	0.118269
Otu0000025	0	0	0	0	0.0107112	0	0	0	0	0	0	0	0.00809717	0	0	0	0	0	0	0	0.00913962	0	0	0	0	0	0	0	0	0	0	0	0	0	0	0	0	0	0	0	0	0	0	0	0	0.000885959	0	0	0
Otu0000026	0.13041	0.110687	0.0869114	0.10821	0.133478	0.113444	0.160388	0.15261	0.174741	0.107695	0.152644	0.103283	0.0962663	0.131736	0.109604	0.170248	0.144795	0.149757	0.159883	0.084927	0.115388	0.132174	0.13357	0.182145	0.154623	0.0824462	0.113359	0.116152	0.133281	0.138611	0.13628	0.118596	0.171732	0.109073	0.126314	0.150004	0.148354	0.0989743	0.148148	0.108342	0.15674	0.091634	0.180772	0.133307	0.134928	0.13821	0.168126	0.192046	0.679227
Otu0000027	0.0557777	0.0509354	0.0370963	0.0512943	0.0766265	0.051006	0.0801942	0.0630132	0.0883307	0.0572127	0.0812555	0.0408133	0.0440846	0.0670511	0.0642126	0.0816392	0.0863905	0.105038	0.056375	0.0518998	0.0662622	0.056074	0.0798921	0.0874775	0.0752445	0.039222	0.0575384	0.0602594	0.0945862	0.0549451	0.0604744	0.0567566	0.0807604	0.0577447	0.0534012	0.075002	0.0697663	0.0589847	0.0590278	0.0344726	0.0759361	0.0396493	0.0590275	0.0766251	0.0644434	0.0558154	0.0827284	0.073864	0.64966
Otu0000028	0.443079	0.545597	0.664554	0.593046	0.397139	0.557549	0.608842	0.618317	0.394608	0.622609	0.531063	0.640518	0.496626	0.581372	0.583449	0.678003	0.430736	0.606306	0.572992	0.709298	0.442129	0.577763	0.566735	0.611144	0.40599	0.609942	0.630346	0.670713	0.395542	0.581918	0.6073	0.707339	0.440005	0.684687	0.627465	0.676137	0.425013	0.664827	0.62037	0.757165	0.465352	0.624697	0.6616	0.742109	0.471242	0.700794	0.613792	0.614548	0.0993791
Otu0000029	0.361377	0.261534	0.275573	0.203772	0.0115352	0.184677	0.00211037	0.290452	0.352363	0.266993	0.32154	0.194071	0.00719748	0.00552185	0.295599	0.0079648	0.375981	0.00623986	0.335477	0.215463	0.283328	0.00500661	0.00374494	0.00838826	0.362166	0.240935	0.292845	0.00698659	0.390383	0.440809	0.295558	0.271076	0.414942	0.00641607	0.377917	0.298888	0.342416	0.227941	0.340278	0.00369349	0.355342	0.18503	0.260705	0.00629796	0.374577	0.345524	0.470574	0.00147728	0.841026
Otu0000030	0.092701	0.0617103	0.0964504	0.0864274	0.097225	0.0817856	0.0865253	0.0836894	0.0892909	0.0706745	0.07313	0.0816265	0.0908682	0.0741506	0.0774979	0.079648	0.0912575	0.0946379	0.0794795	0.0770634	0.0799717	0.0981295	0.0936236	0.0970641	0.0950893	0.0520291	0.0807255	0.0838391	0.0730894	0.0842907	0.075806	0.097418	0.112322	0.083409	0.0883175	0.101868	0.101843	0.0629836	0.0868056	0.0861814	0.0885921	0.0660822	0.0713249	0.0850224	0.0906235	0.0903678	0.101409	0.115228	0.508394
Otu0000031	0.0652049	0.0479969	0.0561744	0.047781	0.0502604	0.0272619	0.0538145	0.042337	0.0480058	0.0448727	0.0487533	0.0566388	0.0503824	0.0489079	0.0398561	0.04978	0.0584048	0.0540788	0.0591475	0.0408908	0.0525528	0.0460608	0.0411944	0.0515279	0.0537461	0.0328184	0.0498094	0.032313	0.0369746	0.0524476	0.0553639	0.0559095	0.0538403	0.0513286	0.0462126	0.0358218	0.0473128	0.0449883	0.0393519	0.0492465	0.0418622	0.0343627	0.0418112	0.0503837	0.0513533	0.0567014	0.0604896	0.0531821	0.741647
Otu0000032	0.269461	0.31051	0.40594	0.612721	0.245534	0.33066	0.360874	0.500167	0.192983	0.311865	0.337791	0.48726	0.237517	0.317112	0.345419	0.568487	0.257955	0.317193	0.408488	0.567753	0.222778	0.326431	0.416937	0.602756	0.221599	0.305771	0.349524	0.351076	0.20723	0.282218	0.28193	0.361717	0.232999	0.354717	0.331704	0.329113	0.217318	0.343911	0.342593	0.380429	0.275512	0.306621	0.343097	0.389424	0.238642	0.339322	0.349594	0.357502	0.0295673
Otu0000033	0.428938	0.507395	0.385802	0.360465	0.476238	0.49511	0.357708	0.377095	0.451255	0.50594	0.355783	0.393973	0.448943	0.422027	0.395239	0.313614	0.435603	0.42847	0.392777	0.347572	0.557517	0.471623	0.439407	0.37148	0.470485	0.534699	0.422521	0.396489	0.462613	0.380869	0.353477	0.427792	0.547686	0.445459	0.424129	0.37501	0.533271	0.53886	0.425926	0.486309	0.465352	0.589453	0.432868	0.397821	0.545755	0.43855	0.404747	0.372274	0.167548
Otu0000034	0.241965	0.225291	0.285112	0.262093	0.274372	0.277016	0.255355	0.292421	0.262112	0.238947	0.269304	0.277364	0.240216	0.240595	0.23028	0.173234	0.222668	0.223595	0.191305	0.28309	0.214781	0.252333	0.209717	0.195327	0.287748	0.324182	0.259352	0.28645	0.268281	0.299076	0.300669	0.356635	0.191226	0.21723	0.204362	0.257469	0.206091	0.207946	0.21412	0.227765	0.251173	0.264329	0.244718	0.21518	0.285967	0.21263	0.241069	0.237842	0.438582
Otu0000035	0.323668	0.31051	0.320088	0.367492	0.327104	0.245357	0.410467	0.275683	0.416691	0.215389	0.596067	0.288192	0.206028	0.319479	0.271243	0.173234	0.400316	0.265194	0.463014	0.226472	0.448984	0.48464	0.287112	0.143799	0.230695	0.330585	0.301432	0.254137	0.235606	0.456419	0.486351	0.226179	0.161521	0.268558	0.446722	0.347024	0.288688	0.289925	0.25463	0.157589	0.146031	0.207058	0.264394	0.145903	0.210448	0.26313	0.235732	0.153637	0.225862
Otu0000036	0.159477	0.00391811	0.117648	0.12156	0.00164788	0.162692	0.00211037	0.00984582	0.00384047	0.152567	0.185146	0.00249877	0.119658	0.00157767	0.00332134	0.171243	0.0036503	0.00623986	0.145096	0.00786361	0.00342736	0.00300396	0.163529	0.00599161	0.00248059	0.00320179	0.111642	0.179031	0.00601912	0.184815	0.00851752	0.141468	0.00649797	0.161318	0.00410779	0.146646	0.00400956	0.00599844	0.119213	0.115729	0	0.00264329	0.00245948	0.00419864	0.138956	0.0044298	0.204597	0.149205	0.0271034
Otu0000037	0.0620625	0.0901166	0.10493	0.179881	0.0675631	0.0457296	0.104463	0.151626	0.073929	0.0762836	0.105052	0.145762	0.0530814	0.0441748	0.0542485	0.064714	0.0742228	0.0644786	0.0702377	0.0691998	0.070832	0.0811071	0.0748989	0.0683044	0.0744177	0.0456256	0.0772904	0.127505	0.0816881	0.127373	0.0953963	0.144009	0.0872584	0.0669105	0.112964	0.158959	0.0938237	0.0479875	0.0821759	0.0578647	0.0778831	0.045817	0.0553383	0.0650789	0.0724988	0.064675	0.0560418	0.132955	0.379447
Otu0000038	0	0	0.179122	0.225554	0.188682	0	0.203651	0	0.219867	0.1851	0.000580397	0	0.206928	0	0	0.000995599	0.214151	0	0.00092418	0.150981	0.227348	0.193255	0.197234	0.240863	0.187698	0.155287	0.201814	0.183398	0.217548	0.230395	0.217197	0	0	0	0.225928	0.175751	0.218922	0.15296	0.199074	0.155127	0.201523	0.115424	0.00245948	0.214131	0	0.176306	0.241069	0	0.284175
Otu0000039	0.0314241	0.0254677	0.0466354	0.0702662	0.0230703	0.0430913	0.0612008	0.0561211	0.0441654	0.0358982	0.0655848	0.0591376	0.0224921	0.0276093	0.0431774	0.029868	0.0511042	0.0363992	0.0388156	0.0220181	0.0274189	0.0390515	0.0411944	0.0287597	0.0314208	0.0272152	0.0240459	0.0480328	0.0292357	0.0387113	0.0698437	0.0491326	0.0213505	0.0357467	0.0554551	0.0805991	0.036086	0.0209945	0.0347222	0.0258544	0.0223914	0.0167408	0.0393517	0.0325394	0.0181247	0.0354384	0.0275761	0.0443184	0.454187
Otu0000040	0.296957	0.280145	0.235297	0.235392	0.305682	0.27086	0.249024	0.25993	0.3274	0.312987	0.310512	0.246545	0.240216	0.272937	0.255743	0.268812	0.321227	0.298473	0.352113	0.224899	0.286756	0.29539	0.30334	0.331935	0.304286	0.264148	0.290268	0.282957	0.323313	0.291583	0.264895	0.225332	0.348105	0.283224	0.262898	0.283216	0.319161	0.259932	0.289352	0.225303	0.259935	0.235253	0.307435	0.250869	0.319196	0.228578	0.284657	0.285115	0.325241
Otu0000041	0.33938	0.368302	0.30313	0.309171	0.299914	0.393978	0.318666	0.295374	0.342762	0.323084	0.326763	0.377314	0.295097	0.367598	0.285635	0.280759	0.32366	0.351512	0.331781	0.292526	0.339308	0.368486	0.337045	0.285201	0.348936	0.37461	0.287692	0.332737	0.321593	0.3253	0.316852	0.331221	0.282197	0.296056	0.309111	0.361577	0.303123	0.362906	0.306713	0.331183	0.26967	0.343627	0.316043	0.292855	0.299058	0.302998	0.290884	0.273297	0.197937
Otu0000042	0.186188	0.286022	0.257554	0.293713	0.215048	0.271739	0.25219	0.316051	0.196824	0.231095	0.270465	0.314012	0.209627	0.235073	0.288957	0.395253	0.155746	0.276634	0.33825	0.43879	0.218208	0.284375	0.344535	0.437388	0.18439	0.279356	0.2396	0.249771	0.190892	0.262238	0.240194	0.261758	0.211648	0.235562	0.248521	0.274261	0.238168	0.301922	0.298611	0.331183	0.227808	0.341865	0.291448	0.332742	0.220517	0.26313	0.285547	0.314661	0.0418871
Otu0000043	0.080917	0.195906	0.20032	0.191124	0.142542	0.182039	0.207872	0.140795	0.138257	0.150324	0.233319	0.170749	0.0899685	0.198787	0.174924	0.128432	0.281073	0.213195	0.219031	0.133681	0.166798	0.173229	0.195985	0.115039	0.133952	0.175298	0.164027	0.197371	0.192612	0.183566	0.201014	0.127067	0.0928281	0.14207	0.146853	0.202617	0.128306	0.178953	0.170139	0.0886438	0.114878	0.116305	0.147569	0.133307	0.11479	0.127578	0.130764	0.0915913	0.16262
Otu0000044	0.104485	0.0734646	0.0614739	0.0948593	0.147485	0.0756297	0.0970771	0.107319	0.127696	0.0919891	0.108534	0.0799607	0.0647773	0.130158	0.0852477	0.114494	0.131411	0.122717	0.0896455	0.0880725	0.110818	0.0931229	0.122335	0.133014	0.129818	0.0720403	0.102195	0.110912	0.144459	0.106768	0.114135	0.097418	0.148525	0.0879919	0.117072	0.107465	0.14274	0.104973	0.0856481	0.075101	0.135322	0.0925151	0.106987	0.132257	0.107741	0.0965696	0.152114	0.106364	0.344131
Otu0000045	0.203471	0.322265	0.422898	0.33798	0.201865	0.380787	0.322887	0.321958	0.206425	0.329815	0.314575	0.331504	0.225821	0.327367	0.355383	0.628223	0.212934	0.352552	0.385383	0.608644	0.227348	0.313414	0.375743	0.663871	0.210023	0.334587	0.33836	0.334483	0.202071	0.273477	0.303224	0.304114	0.208863	0.335469	0.367647	0.265305	0.182836	0.341911	0.309028	0.449375	0.234623	0.360368	0.346787	0.433509	0.204406	0.332235	0.324687	0.379661	0.0706331
Otu0000046	0.253749	0.271329	0.242716	0.196043	0.297442	0.28581	0.242693	0.279621	0.339881	0.289429	0.276269	0.239049	0.22852	0.280037	0.2801	0.229983	0.397883	0.298473	0.27633	0.218608	0.315317	0.256338	0.315824	0.237268	0.382011	0.252942	0.270516	0.256757	0.310415	0.257867	0.316852	0.27277	0.276628	0.288723	0.219767	0.306724	0.25581	0.321916	0.309028	0.233921	0.383574	0.290762	0.309894	0.271862	0.280933	0.275533	0.274872	0.260001	0.188902
Otu0000047	0.438366	0.430013	0.394281	0.399814	0.410322	0.321866	0.378812	0.384971	0.420531	0.383662	0.378419	0.337334	0.458839	0.347877	0.37199	0.358416	0.259171	0.266234	0.25415	0.303535	0.260479	0.329435	0.247166	0.190533	0.399375	0.359401	0.394181	0.35457	0.435097	0.480145	0.417359	0.387978	0.495702	0.384964	0.384078	0.415309	0.370483	0.386899	0.383102	0.327489	0.441987	0.26521	0.312354	0.395722	0.419889	0.378305	0.37895	0.459434	0.122376
Otu0000048	0.0997714	0.0832599	0.0890312	0.095562	0.0840419	0.112565	0.0981323	0.101412	0.106573	0.0964764	0.0882203	0.103283	0.103464	0.0899273	0.101854	0.07467	0.141145	0.087358	0.113674	0.0817816	0.102821	0.100132	0.0973686	0.0910725	0.117415	0.112863	0.0884545	0.096939	0.122102	0.0974026	0.107321	0.0914882	0.109537	0.0806592	0.09756	0.0884351	0.104249	0.0839782	0.0706019	0.128041	0.11001	0.109256	0.0996089	0.0818734	0.10472	0.0797363	0.107636	0.0782958	0.440225
Otu0000049	0.00314241	0.167499	0.00529947	0.00210799	0.163964	0.00439707	0.158278	0.200855	0.191063	0.00224364	0.00522357	0.0841253	0.00179937	0.187743	0.128425	0.0019912	0.182515	0.248554	0.00739344	0.128963	0.119958	0.145192	0	0.244458	0.163719	0.132874	0.000858782	0.00174665	0.178854	0.00374625	0.195903	0	0.204222	0.000916582	0.136584	0.00111943	0.162788	0.176954	0.00347222	0.00246233	0.187893	0.154192	0.162326	0.187889	0	0.131122	0.00266866	0	0.928907
Otu0000050	0	0.00293858	0.00317968	0.000702662	0.00164788	0.00263824	0	0.000984581	0	0.00224364	0.00174119	0.00333169	0.00179937	0.00394418	0.00110711	0.000995599	0	0	0	0.00157272	0	0.00801057	0.00499326	0.00119832	0.00165373	0	0.000858782	0.0034933	0	0.00124875	0.000851752	0.00169423	0	0.00183316	0.00102695	0	0.00160382	0	0	0.00615582	0.00389416	0.00352438	0.00245948	0.00104966	0.00100693	0.00177192	0.000889553	0.00147728	0.000821315
Otu0000051	0.229396	0.247821	0.245896	0.233986	0.226584	0.194351	0.206817	0.213654	0.235229	0.198562	0.229257	0.224889	0.249213	0.21693	0.212566	0.181199	0.192249	0.175756	0.215334	0.204454	0.235345	0.203268	0.167274	0.134212	0.258808	0.270552	0.256776	0.226191	0.239045	0.221029	0.254674	0.25244	0.163377	0.192482	0.166365	0.148884	0.20128	0.161958	0.211806	0.183443	0.22294	0.206176	0.212745	0.156399	0.265829	0.206429	0.193923	0.221592	0.350701
Otu0000052	0	0	0	0	0.00906335	0	0	0	0	0	0	0	0.00449843	0	0	0	0	0	0	0	0.00342736	0	0	0	0	0	0	0	0	0	0	0	0	0	0	0	0	0	0	0	0	0	0	0	0	0	0	0	0
Otu0000053	0.0479217	0.0244882	0.0275573	0.0463757	0.0321337	0.0184677	0.0474834	0.0571057	0.0451255	0.0347764	0.05862	0.033317	0.0224921	0.038653	0.0276778	0.059736	0.0486707	0.0582387	0.0683893	0.0220181	0.0388434	0.0290383	0.0411944	0.0635111	0.0388626	0.0280157	0.0420803	0.0419196	0.0395542	0.0374625	0.0417359	0.0457441	0.0538403	0.0421628	0.0472396	0.0470162	0.0617472	0.0249935	0.0381944	0.0443219	0.0399151	0.0290762	0.0405814	0.0409367	0.0402771	0.0336665	0.0533732	0.073864	0.454187
Otu0000054	0.180688	0.20766	0.133547	0.235392	0.329576	0.221612	0.156168	0.292421	0.241949	0.207536	0.231578	0.164919	0.148448	0.257161	0.194852	0.213058	0.267689	0.217355	0.199623	0.237481	0.247912	0.237313	0.178509	0.272019	0.251366	0.19611	0.159733	0.202611	0.287198	0.257867	0.246156	0.204154	0.319329	0.227312	0.180743	0.29665	0.274254	0.264931	0.184028	0.183443	0.337818	0.183268	0.18938	0.204684	0.257773	0.190481	0.249964	0.149205	0.145373
Otu0000055	0.212112	0.314428	0.324328	0.315495	0.220816	0.306916	0.278569	0.279621	0.194904	0.258018	0.291939	0.336501	0.233918	0.261894	0.276778	0.283746	0.229969	0.236075	0.260619	0.325554	0.182792	0.279369	0.250911	0.246854	0.196793	0.252942	0.285974	0.296057	0.20465	0.237263	0.260636	0.274465	0.216289	0.282307	0.246467	0.312322	0.193261	0.30592	0.321759	0.286861	0.185946	0.286356	0.300057	0.251918	0.207427	0.262244	0.25797	0.23341	0.0394231
Otu0000056	0.268676	0.308551	0.30207	0.295118	0.258717	0.292845	0.364039	0.244176	0.239069	0.265871	0.335469	0.32484	0.25641	0.289503	0.273457	0.216045	0.260388	0.333833	0.28742	0.24849	0.265049	0.302399	0.308334	0.240863	0.233175	0.235332	0.319467	0.310903	0.27516	0.26973	0.340701	0.274465	0.181943	0.236478	0.311165	0.340307	0.23897	0.271929	0.274306	0.192061	0.175237	0.184149	0.271773	0.235124	0.217496	0.25427	0.267755	0.218637	0.0172476
Otu0000057	0.203471	0.159663	0.116588	0.19534	0.138422	0.184677	0.228975	0.246145	0.226588	0.204171	0.181664	0.177413	0.189834	0.141991	0.19928	0.122459	0.209284	0.247514	0.153414	0.172999	0.220493	0.191252	0.154791	0.136609	0.214158	0.153686	0.210402	0.179905	0.214969	0.128621	0.237639	0.230415	0.222787	0.178733	0.201282	0.11754	0.220526	0.177954	0.197917	0.123116	0.122666	0.153311	0.23857	0.179492	0.204406	0.203771	0.230394	0.121137	0.110877
Otu0000058	0.175975	0.220394	0.322208	0.301442	0.210929	0.203145	0.2543	0.319004	0.169941	0.226607	0.283814	0.308182	0.192533	0.20983	0.245779	0.454989	0.164264	0.247514	0.292965	0.468671	0.182792	0.219289	0.262146	0.462552	0.199274	0.222525	0.255917	0.239291	0.214109	0.229146	0.241046	0.264299	0.200509	0.241061	0.287545	0.232842	0.199676	0.247936	0.273148	0.28563	0.229755	0.226442	0.271773	0.239322	0.204406	0.248955	0.277541	0.305797	0.03121
Otu0000059	0.144551	0.176315	0.222578	0.206583	0.130183	0.175004	0.145616	0.261899	0.0940914	0.171638	0.17586	0.26487	0.127755	0.174333	0.188209	0.259851	0.131411	0.151837	0.187609	0.309826	0.124527	0.154204	0.210965	0.270821	0.124856	0.204114	0.214695	0.197371	0.121242	0.191683	0.178868	0.209237	0.110465	0.186983	0.226955	0.193662	0.109862	0.195949	0.172454	0.227765	0.144084	0.191198	0.207826	0.234074	0.121838	0.2082	0.191254	0.218637	0.0328526
Otu0000060	0.106842	0.159663	0.243776	0.178476	0.0725068	0.194351	0.159333	0.209716	0.102732	0.235582	0.141036	0.235717	0.127755	0.149879	0.160531	0.18319	0.073006	0.151837	0.136779	0.204454	0.0742594	0.134177	0.139811	0.180947	0.0835132	0.152886	0.188932	0.227938	0.0765289	0.102398	0.180572	0.182976	0.076119	0.154902	0.182797	0.19702	0.090616	0.129966	0.131944	0.168669	0.0710684	0.1771	0.156177	0.18474	0.0785404	0.156815	0.141439	0.187614	0.132232
Otu0000061	0.251392	0.321285	0.321148	0.280362	0.33452	0.342972	0.295452	0.238269	0.282274	0.255775	0.303547	0.269034	0.247413	0.307646	0.308885	0.189164	0.338261	0.275594	0.278178	0.245345	0.287898	0.319422	0.294602	0.182145	0.248886	0.30337	0.272234	0.280337	0.310415	0.3253	0.300669	0.222791	0.193082	0.268558	0.243386	0.302247	0.294302	0.300922	0.319444	0.182212	0.183025	0.227323	0.264394	0.172144	0.21951	0.229463	0.225946	0.171364	0.0665265
Otu0000062	0.164976	0.140072	0.143086	0.191124	0.148309	0.138068	0.188878	0.132918	0.160339	0.163785	0.162511	0.159921	0.144849	0.118325	0.151675	0.154318	0.144795	0.176796	0.173746	0.147836	0.167941	0.15921	0.172267	0.155782	0.160411	0.145682	0.165745	0.170298	0.129841	0.194805	0.14565	0.185518	0.158736	0.186066	0.174581	0.150004	0.152363	0.161958	0.159722	0.124347	0.146031	0.140094	0.154947	0.141704	0.160101	0.159473	0.146776	0.197955	0.151122
Otu0000063	0.195615	0.376139	0.284052	0.322522	0.372421	0.459054	0.353487	0.307189	0.24771	0.306256	0.296002	0.292356	0.236617	0.383374	0.385275	0.239939	0.388149	0.361912	0.282799	0.309826	0.235345	0.270357	0.359515	0.279209	0.290229	0.331386	0.297997	0.32051	0.367167	0.274101	0.281078	0.271076	0.241353	0.332719	0.220794	0.366054	0.372889	0.363905	0.324074	0.283168	0.235596	0.361249	0.313584	0.266613	0.256767	0.280849	0.287326	0.23341	0.0459936
Otu0000064	0.227824	0.212558	0.227877	0.21642	0.236471	0.216336	0.232141	0.191993	0.253471	0.235582	0.216488	0.194071	0.193432	0.195631	0.232494	0.166265	0.187382	0.172636	0.206092	0.171427	0.193074	0.258341	0.136066	0.124626	0.21085	0.281758	0.237024	0.223571	0.228727	0.220405	0.264043	0.177047	0.211648	0.202565	0.192039	0.260828	0.218922	0.170956	0.194444	0.156358	0.22002	0.228204	0.233651	0.189988	0.212462	0.207314	0.192143	0.183183	0.266106
Otu0000065	0.158692	0.150847	0.0784322	0.106102	0.220816	0.189954	0.155112	0.117165	0.273633	0.116669	0.194433	0.114111	0.106163	0.178277	0.177138	0.134406	0.249437	0.179916	0.164504	0.130536	0.154231	0.215284	0.19973	0.154584	0.174468	0.150484	0.104771	0.175538	0.238185	0.201673	0.2189	0.134691	0.218146	0.175067	0.139665	0.158959	0.25581	0.172955	0.153935	0.123116	0.200549	0.193841	0.145109	0.127009	0.190309	0.148841	0.137881	0.138864	0.19383
Otu0000066	0	0	0.00211979	0.00210799	0.00164788	0	0	0	0	0	0	0.00166585	0	0.00236651	0.00110711	0	0	0.00103998	0.00184836	0.00157272	0	0	0.00249663	0.00359497	0	0	0	0	0	0.000624376	0	0	0	0.000916582	0.00102695	0	0	0.00099974	0	0.00123116	0	0	0	0	0	0.00177192	0	0	0.000821315
Otu0000067	0.136695	0.140072	0.116588	0.14264	0.140894	0.122239	0.150892	0.140795	0.16322	0.125644	0.154966	0.12244	0.122357	0.161711	0.116247	0.143366	0.2032	0.148717	0.155262	0.149409	0.135952	0.125165	0.172267	0.123427	0.156277	0.116865	0.139123	0.135365	0.155637	0.144231	0.17972	0.149939	0.17266	0.133821	0.137611	0.152243	0.153165	0.131966	0.152778	0.0861814	0.163555	0.0960395	0.158636	0.113363	0.157081	0.130236	0.143218	0.150683	0.167548
Otu0000068	0	0	0.00317968	0.000702662	0	0	0	0	0.000960117	0	0.00116079	0	0	0	0	0	0	0.00103998	0.00184836	0	0	0.00100132	0	0.00119832	0	0	0	0.00174665	0.000859875	0	0.000851752	0	0	0	0	0	0	0.00099974	0	0	0.00194708	0.000881096	0	0.00104966	0.00503464	0	0.00177911	0	0.000821315
Otu0000069	0.219183	0.323244	0.276633	0.192529	0.262837	0.31483	0.275404	0.205778	0.275554	0.217633	0.239123	0.237383	0.222222	0.239806	0.235815	0.154318	0.389365	0.244395	0.201471	0.187154	0.249055	0.233308	0.187247	0.15698	0.258808	0.252141	0.215554	0.180778	0.279459	0.1998	0.229121	0.163493	0.159664	0.202565	0.185877	0.211573	0.232554	0.222942	0.209491	0.169901	0.202496	0.254637	0.220123	0.1543	0.21951	0.17985	0.184137	0.162501	0.139624
Otu0000070	0.0793458	0.132236	0.147325	0.249445	0.0774504	0.130153	0.139285	0.193963	0.104653	0.112182	0.143938	0.211563	0.0935673	0.120692	0.105176	0.129428	0.11681	0.114397	0.131234	0.116381	0.100536	0.156206	0.119838	0.136609	0.0917818	0.119267	0.157157	0.159818	0.0997455	0.13986	0.178868	0.205001	0.115107	0.14207	0.124261	0.147765	0.0994371	0.11597	0.167824	0.142815	0.103195	0.100445	0.108217	0.112314	0.097672	0.123148	0.0862867	0.165455	0.157692
Otu0000071	0.220754	0.200803	0.206679	0.183395	0.245534	0.19523	0.228975	0.192978	0.211226	0.241191	0.197335	0.193238	0.251912	0.177488	0.185995	0.182195	0.236053	0.245435	0.259695	0.21389	0.231918	0.2273	0.255905	0.264829	0.259635	0.165693	0.187214	0.255884	0.227867	0.233516	0.246156	0.199919	0.280341	0.209897	0.187931	0.277619	0.246187	0.278927	0.303241	0.310253	0.288168	0.16917	0.229961	0.287607	0.288988	0.256042	0.326466	0.260001	0.028746
Otu0000072	0.000785601	0	0	0.317603	0	0	0	0.768958	0	0	0.00348238	0.599705	0	0.00157767	0.0332134	0.68099	0	0	0.00184836	1.22672	0	0	0.0112348	1.42241	0	0	0	0	0	0	0	0	0	0	0	0	0	0	0	0	0	0	0	0	0	0	0	0	0.00246394
Otu0000073	0.116269	0.138113	0.139906	0.202367	0.168084	0.177642	0.150892	0.198885	0.172821	0.124522	0.192111	0.213228	0.118758	0.163289	0.19928	0.18319	0.143579	0.169516	0.187609	0.152554	0.171368	0.183242	0.171019	0.174955	0.152143	0.159289	0.185497	0.225318	0.158217	0.160465	0.191644	0.236345	0.195867	0.164985	0.167392	0.223886	0.183638	0.218943	0.166667	0.199448	0.184972	0.215869	0.206596	0.200485	0.15406	0.173648	0.188585	0.174319	0.0911659
Otu0000074	0.194044	0.169458	0.19714	0.173557	0.189506	0.145983	0.159333	0.148672	0.182422	0.158176	0.173539	0.163253	0.177238	0.142779	0.145032	0.121463	0.132628	0.128957	0.164504	0.158845	0.142807	0.164217	0.113597	0.0898742	0.18191	0.170495	0.167462	0.129252	0.159937	0.164211	0.178016	0.136385	0.112322	0.150319	0.175608	0.110824	0.153967	0.108972	0.162037	0.115729	0.148951	0.113661	0.137731	0.137505	0.153053	0.156815	0.168126	0.118182	0.255429
Otu0000075	0.0400657	0.0225291	0.0254375	0.051997	0.0584998	0.0263824	0.0411523	0.0531674	0.0643278	0.0347764	0.0504945	0.0258206	0.0260909	0.0410195	0.0464988	0.04978	0.0644887	0.0655185	0.0489816	0.0471817	0.0319887	0.0390515	0.0511809	0.0695027	0.0512655	0.0208117	0.047233	0.0480328	0.0567517	0.0668082	0.0570674	0.0415085	0.0584817	0.0449125	0.0451857	0.0503745	0.0577376	0.0389899	0.0462963	0.0418595	0.0496505	0.0246707	0.0676357	0.0377877	0.0533672	0.0372103	0.0613792	0.0782958	0.314564
Otu0000076	0.0659905	0.106769	0.124008	0.0983726	0.0543801	0.0905797	0.0918012	0.112242	0.057607	0.0942327	0.0812555	0.0991179	0.0710751	0.0938715	0.0852477	0.127437	0.0620551	0.0831981	0.0794795	0.128963	0.0514104	0.0991309	0.0836371	0.12822	0.0661491	0.120067	0.0875958	0.134492	0.0696499	0.088037	0.08262	0.123679	0.0724059	0.110906	0.0852366	0.0996295	0.0497185	0.11397	0.0914352	0.103418	0.06328	0.10485	0.109447	0.119661	0.0543741	0.0947976	0.0871762	0.104887	0.107592
Otu0000077	0.0903442	0.0548536	0.0614739	0.0730768	0.0634434	0.0246236	0.0633112	0.0679361	0.0748891	0.0482382	0.0667456	0.0516413	0.0755735	0.038653	0.0664268	0.0607316	0.128977	0.0592787	0.0850246	0.0408908	0.0674047	0.0700925	0.0586708	0.0503295	0.0768983	0.0424238	0.136546	0.0585127	0.0524524	0.0949051	0.0570674	0.0779344	0.0668362	0.0696602	0.0688055	0.0638076	0.0641529	0.0369904	0.0717593	0.0357037	0.0730154	0.0308384	0.0577978	0.0514333	0.0855889	0.0584733	0.0658269	0.0797731	0.353165
Otu0000078	0.124125	0.135175	0.185482	0.220636	0.134302	0.145103	0.125567	0.186086	0.124815	0.164907	0.127687	0.241548	0.153846	0.145935	0.139496	0.0079648	0.0985581	0.132077	0.149717	0.251636	0.1211	0.116153	0.139811	0.227681	0.0959161	0.138478	0.00171756	0.165932	0.096306	0.138611	0.149057	0.168575	0.0974695	0.161318	0.168419	0.125376	0.115475	0.15396	0.15625	0.227765	0.12656	0.15243	0.175853	0.203634	0.119824	0.162131	0.168126	0.20091	0.0353165
Otu0000079	0.227824	0.256636	0.251195	0.224852	0.265309	0.218974	0.204706	0.171317	0.24771	0.235582	0.244927	0.206565	0.232119	0.23034	0.257957	0.187173	0.257955	0.239195	0.252301	0.223327	0.239915	0.236312	0.243421	0.194128	0.25054	0.256944	0.226718	0.206978	0.27258	0.264735	0.229121	0.232109	0.244138	0.25481	0.222848	0.21605	0.27666	0.283926	0.244213	0.225303	0.234623	0.211463	0.250867	0.212031	0.27187	0.223262	0.260639	0.239319	0.0542068
Otu0000080	0.0667761	0.0421197	0.0529947	0.0421597	0.0519082	0.0413325	0.062256	0.0443062	0.057607	0.0392636	0.0412082	0.0458108	0.0620783	0.0291869	0.038749	0.0408196	0.052321	0.0374392	0.0388156	0.0424635	0.0651198	0.0470621	0.0536775	0.0395446	0.0380357	0.0352197	0.0343513	0.062006	0.0498727	0.0580669	0.0459946	0.089794	0.0612665	0.0540783	0.0503204	0.101868	0.0641529	0.0369904	0.0509259	0.075101	0.050624	0.0361249	0.0504193	0.0587809	0.0714919	0.0354384	0.0471463	0.0694321	0.233253
Otu0000081	0.114698	0.0852189	0.0879713	0.165828	0.0881616	0.0641973	0.128733	0.139811	0.0931313	0.100964	0.112597	0.111612	0.0854701	0.0828278	0.0752837	0.0925907	0.0863905	0.0925579	0.108129	0.0786361	0.1211	0.108143	0.0986169	0.0874775	0.1108	0.0728408	0.117653	0.124012	0.0851276	0.109266	0.114987	0.132997	0.0918998	0.0934914	0.111937	0.109704	0.10906	0.0679823	0.087963	0.0726386	0.0856714	0.0607956	0.0873115	0.0997176	0.106734	0.0744206	0.0978508	0.0782958	0.247216
Otu0000082	0.128053	0.122441	0.0996301	0.130695	0.102169	0.097615	0.0886356	0.12898	0.0835302	0.0908673	0.0899615	0.106614	0.118758	0.0970269	0.0719624	0.0736744	0.0997749	0.102958	0.106281	0.0959361	0.0948235	0.128169	0.109852	0.0838826	0.0768983	0.12567	0.103054	0.0882058	0.0911467	0.114885	0.121801	0.0923353	0.122533	0.128321	0.127341	0.101868	0.100239	0.11697	0.099537	0.0984931	0.118772	0.0837041	0.118055	0.09237	0.108748	0.115175	0.116531	0.0782958	0.160156
Otu0000083	0.0644193	0.0411402	0.0445156	0.041457	0.0617955	0.0448501	0.0612008	0.084674	0.0748891	0.03702	0.0748712	0.0308182	0.0503824	0.0765171	0.0464988	0.0487844	0.0851737	0.088398	0.0711619	0.0298817	0.0445556	0.0500661	0.067409	0.0826842	0.0719371	0.0312175	0.039504	0.0392996	0.082548	0.0599401	0.0519569	0.0559095	0.0816887	0.0577447	0.0503204	0.0660465	0.0657568	0.045988	0.0590278	0.0492465	0.0788567	0.0440548	0.0774736	0.0755755	0.0674642	0.0549295	0.0996299	0.0945459	0.209435
Otu0000084	0.238037	0.233128	0.184422	0.181989	0.189506	0.247995	0.222644	0.229407	0.226588	0.212024	0.239704	0.189907	0.174539	0.226396	0.200387	0.188168	0.223885	0.236075	0.167277	0.149409	0.138237	0.186246	0.194737	0.166567	0.236483	0.219323	0.182062	0.164185	0.220128	0.191683	0.231677	0.225332	0.220931	0.244727	0.196147	0.17799	0.190053	0.156959	0.221065	0.131734	0.172316	0.186792	0.212745	0.166896	0.177219	0.202885	0.223278	0.178751	0.128946
Otu0000085	0	0	0.00105989	0.00210799	0.00082394	0.000879415	0	0.000984581	0	0	0	0.00333169	0	0	0.00110711	0.000995599	0	0	0	0.00157272	0.00114245	0	0	0	0.000826863	0	0	0	0	0	0	0	0	0	0	0	0	0	0	0	0.000973539	0	0	0	0.00100693	0	0	0	0
Otu0000086	0.100557	0.12538	0.146265	0.108913	0.0741546	0.127515	0.120291	0.114211	0.0777695	0.146958	0.106793	0.114111	0.107962	0.114381	0.11514	0.179208	0.0790899	0.127917	0.121068	0.19659	0.0868264	0.127168	0.117342	0.153385	0.0620147	0.12567	0.139123	0.186891	0.0705097	0.121753	0.128615	0.130455	0.0770473	0.122822	0.13453	0.126496	0.0882103	0.122968	0.127315	0.178519	0.0915127	0.147143	0.146339	0.191038	0.0825681	0.147955	0.134323	0.143296	0.0936299
Otu0000087	0.146907	0.189049	0.157924	0.131398	0.186211	0.19523	0.167775	0.196916	0.182422	0.167151	0.169476	0.125771	0.125056	0.160134	0.151675	0.117481	0.249437	0.167436	0.173746	0.128963	0.191932	0.173229	0.169771	0.143799	0.19514	0.188105	0.145134	0.164185	0.181434	0.142358	0.208679	0.155869	0.175445	0.1824	0.135557	0.199259	0.15958	0.168956	0.168981	0.148971	0.192761	0.1771	0.200448	0.15535	0.20642	0.177192	0.150334	0.132955	0.119912
Otu0000088	0.0180688	0.122441	0.10281	0.0990753	0.0313097	0.153898	0.145616	0.107319	0.0307237	0.14808	0.103891	0.126604	0.0116959	0.155401	0.158317	0.130424	0.0243353	0.121677	0.136779	0.141545	0.0194217	0.150198	0.113597	0.123427	0.0140567	0.140879	0.139981	0.130125	0.0180574	0.15984	0.124356	0.118596	0.0222787	0.153069	0.167392	0.142168	0.0425013	0.162958	0.121528	0.185906	0.0340739	0.179744	0.115596	0.15535	0.028194	0.168332	0.143218	0.132955	0.0221755
Otu0000089	0.0345665	0.0293858	0.0275573	0.0238905	0.0387252	0.036056	0.0295452	0.0403678	0.0422451	0.03702	0.0406278	0.0249877	0.0305893	0.0370753	0.0265707	0.0457976	0.0413701	0.045759	0.0332705	0.0188727	0.0297038	0.0300397	0.0362011	0.0479329	0.0380357	0.0312175	0.0249047	0.0401729	0.0386944	0.0312188	0.0383289	0.029649	0.052912	0.0311638	0.019512	0.033583	0.0368879	0.0449883	0.0335648	0.0307791	0.037968	0.0290762	0.0221353	0.0367381	0.0372563	0.0354384	0.0364717	0.0413638	0.24393
Otu0000090	0.0259248	0.018611	0.0233177	0.0259985	0.0148309	0.0202265	0.0348211	0.0275683	0.0278434	0.0258018	0.0284394	0.0283194	0.0269906	0.0276093	0.0177138	0.0338504	0.0340695	0.0332793	0.0341947	0.0220181	0.0319887	0.0180238	0.0274629	0.0263631	0.0314208	0.0208117	0.027481	0.0183398	0.0189172	0.0337163	0.0272561	0.0262605	0.036203	0.0329969	0.0267006	0.0156721	0.0296707	0.0169956	0.025463	0.0184674	0.0136295	0.0237896	0.0381219	0.0304401	0.0120831	0.0345524	0.0426985	0.026591	0.248858
Otu0000091	0.140623	0.162602	0.177002	0.16091	0.141718	0.209301	0.165664	0.131934	0.160339	0.162664	0.157287	0.15659	0.144849	0.173544	0.167174	0.136397	0.188599	0.158076	0.144172	0.1557	0.162228	0.152201	0.151046	0.116237	0.170334	0.19611	0.141699	0.181651	0.191752	0.156718	0.149908	0.166034	0.137386	0.151236	0.135557	0.161198	0.14675	0.173955	0.138889	0.129272	0.114878	0.1771	0.169704	0.138555	0.151039	0.111631	0.112973	0.107841	0.120733
Otu0000092	0.0612769	0.0852189	0.0985702	0.0948593	0.0519082	0.0993739	0.0759734	0.0945198	0.0537665	0.0796491	0.0592004	0.0799607	0.0647773	0.0938715	0.0819264	0.100556	0.0547545	0.0582387	0.0646926	0.116381	0.0594075	0.0801057	0.091127	0.0898742	0.0537461	0.0776435	0.0798667	0.101306	0.0541721	0.0668082	0.0664367	0.113513	0.0705494	0.0797426	0.0924252	0.0738825	0.05453	0.0909763	0.0833333	0.108342	0.06328	0.0837041	0.0860818	0.0913204	0.0624295	0.0903678	0.0818389	0.0590912	0.0796675
Otu0000093	0.0149264	0.0146929	0.0222578	0.0161612	0.0304858	0.025503	0.0232141	0.0255991	0.0278434	0.01234	0.033663	0.00666339	0.00989654	0.0165656	0.0243565	0.0238944	0.0438036	0.0207995	0.00831762	0.0110091	0.0194217	0.0270357	0.0262146	0.0395446	0.0272865	0.0184103	0.0094466	0.0200865	0.034395	0.0206044	0.0340701	0.0144009	0.0352747	0.0247477	0.0174581	0.0156721	0.0280669	0.0199948	0.0162037	0.0233921	0.0292062	0.0220274	0.0159866	0.0241422	0.0130901	0.0248069	0.025797	0.0192046	0.260357
Otu0000094	0.0102128	0.0450583	0.0127187	0.00772928	0.0164788	0.0325383	0.0126622	0.407617	0.00768093	0.0426291	0.00928634	0.322342	0.0107962	0.0086772	0.0298921	0.405209	0.0073006	0.485669	0.0046209	0.298817	0.012567	0.031041	0.501823	0.0359497	0.605264	0.00480269	0.0111642	0.460242	0.0490129	0.451424	0.0391806	0.411697	0.046414	0.00274975	0.0102695	0.441056	0.0112268	0.0099974	0.400463	0.0307791	0.0107089	0.00704877	0.585356	0.00944693	0.0302078	0.00885959	0.439439	0.0605685	0.0188902
Otu0000095	0.194044	0.221373	0.181242	0.194637	0.261189	0.267342	0.178326	0.197901	0.227548	0.195196	0.26292	0.189074	0.213225	0.204309	0.223637	0.13341	0.197116	0.217355	0.269861	0.180863	0.276473	0.219289	0.22969	0.196525	0.27948	0.23293	0.243894	0.199118	0.2743	0.20542	0.221456	0.188059	0.251564	0.172317	0.191012	0.148884	0.275056	0.239938	0.210648	0.167438	0.241438	0.22468	0.23488	0.119661	0.234614	0.209972	0.181469	0.162501	0.0336739
Otu0000096	0.0699185	0.0509354	0.0508749	0.0646449	0.0749786	0.0703532	0.0654215	0.0718744	0.0873706	0.0527255	0.0800947	0.065801	0.0611786	0.0741506	0.0708552	0.0657096	0.0657054	0.0769583	0.0637684	0.0393181	0.0948235	0.0781031	0.0636641	0.0587178	0.0777251	0.0648363	0.0626911	0.0812192	0.0722295	0.0842907	0.0877305	0.0686162	0.0937564	0.050412	0.0729132	0.0738825	0.0809931	0.0689821	0.0648148	0.0504777	0.0827508	0.073131	0.0651762	0.0881714	0.097672	0.064675	0.0693851	0.0842049	0.123197
Otu0000097	0.0997714	0.12538	0.0922108	0.118047	0.168908	0.153898	0.103408	0.121104	0.168981	0.103207	0.16135	0.104115	0.101664	0.136469	0.159424	0.0925907	0.15818	0.139357	0.144172	0.111663	0.147376	0.169223	0.154791	0.136609	0.120722	0.112063	0.129676	0.137985	0.171115	0.132992	0.17035	0.136385	0.17266	0.157652	0.119126	0.164557	0.187647	0.147962	0.152778	0.12681	0.134348	0.116305	0.104528	0.110214	0.151039	0.109859	0.111194	0.101932	0.111699
Otu0000098	0.102128	0.153786	0.157924	0.132803	0.120295	0.161812	0.131898	0.115196	0.110413	0.163785	0.148582	0.144929	0.150247	0.148301	0.148353	0.276777	0.119243	0.163276	0.171898	0.23119	0.101678	0.140185	0.20722	0.249251	0.122376	0.174498	0.172615	0.162438	0.132421	0.163586	0.167795	0.167728	0.116035	0.1769	0.18177	0.124257	0.106654	0.187951	0.185185	0.214222	0.144084	0.171814	0.175853	0.163747	0.144998	0.227692	0.145887	0.165455	0.0558494
Otu0000099	0.101343	0.0959937	0.10387	0.132803	0.0881616	0.0518855	0.102353	0.0797511	0.119054	0.0897455	0.105052	0.0907887	0.105263	0.0922939	0.0863548	0.0876128	0.0851737	0.103998	0.12384	0.084927	0.105106	0.112148	0.113597	0.0730977	0.0917818	0.0896502	0.111642	0.116152	0.0885671	0.131119	0.0885823	0.0940295	0.105824	0.114573	0.109883	0.082838	0.108258	0.072981	0.087963	0.0578647	0.0905391	0.0511036	0.0823926	0.0976183	0.0936443	0.104543	0.152114	0.128523	0.101022
Otu0000100	0.190116	0.117543	0.149445	0.131398	0.14419	0.117842	0.117126	0.125042	0.150738	0.136862	0.142197	0.139098	0.147548	0.124636	0.127318	0.129428	0.137495	0.117517	0.138627	0.111663	0.095966	0.170225	0.113597	0.0754943	0.124856	0.140078	0.152863	0.113532	0.144459	0.134241	0.142243	0.144009	0.141099	0.191566	0.150961	0.139929	0.127504	0.11497	0.15162	0.0984931	0.133375	0.111899	0.114366	0.117562	0.119824	0.163017	0.131654	0.122614	0.13141
Otu0000101	0.0895586	0.0920756	0.0625338	0.113831	0.145014	0.0958562	0.0939116	0.0797511	0.117134	0.0796491	0.11782	0.0916216	0.0854701	0.140413	0.106283	0.106529	0.139928	0.114397	0.0877971	0.0959361	0.0971085	0.084111	0.127328	0.141402	0.125683	0.0776435	0.0961836	0.0986856	0.14016	0.0961538	0.110728	0.134691	0.116035	0.100824	0.0944791	0.141048	0.110664	0.118969	0.130787	0.0738698	0.128507	0.082823	0.103298	0.12281	0.102707	0.0850521	0.115642	0.112273	0.0895233
Otu0000102	0.158692	0.154765	0.1982	0.212204	0.109584	0.183798	0.179382	0.196916	0.116174	0.161542	0.171217	0.205732	0.164642	0.153823	0.17271	0.256865	0.115593	0.181996	0.166352	0.207599	0.153089	0.168222	0.200979	0.224086	0.109146	0.192108	0.156298	0.181651	0.130701	0.161713	0.188237	0.183824	0.11325	0.143903	0.157123	0.164557	0.0978332	0.172955	0.178241	0.219147	0.14019	0.159478	0.145109	0.21518	0.137949	0.18428	0.15834	0.159546	0.00985578
Otu0000103	0.136695	0.0979528	0.133547	0.104697	0.132654	0.093218	0.119236	0.0925507	0.118094	0.114425	0.0853183	0.0807936	0.148448	0.109648	0.0952117	0.117481	0.0997749	0.109198	0.0850246	0.119527	0.132524	0.113149	0.0986169	0.129419	0.115761	0.128872	0.102195	0.110912	0.124682	0.0955295	0.0970998	0.10843	0.148525	0.134738	0.138638	0.101868	0.145146	0.117969	0.126157	0.168669	0.147004	0.134808	0.100839	0.137505	0.162115	0.101885	0.122758	0.137387	0.0344952
Otu0000104	0.0997714	0.133216	0.121888	0.149667	0.126063	0.109927	0.157223	0.0935352	0.125775	0.0942327	0.181084	0.098285	0.082771	0.103338	0.102962	0.0786524	0.173998	0.126877	0.1414	0.0802089	0.110818	0.0971282	0.117342	0.0695027	0.112453	0.0792444	0.122806	0.105672	0.124682	0.132992	0.117542	0.0838642	0.0816887	0.0925748	0.131449	0.100749	0.120287	0.0799792	0.118056	0.0824879	0.0778831	0.0713688	0.120515	0.0850224	0.083575	0.0744206	0.114752	0.0723867	0.11252
Otu0000105	0.102914	0.0675874	0.0816119	0.10821	0.13183	0.0809061	0.11396	0.11815	0.112334	0.08638	0.107954	0.0832924	0.0674764	0.0993934	0.0697481	0.104538	0.130194	0.115437	0.118295	0.102227	0.124527	0.0761005	0.11859	0.160575	0.103358	0.0600336	0.102195	0.0890791	0.127261	0.123626	0.109024	0.105889	0.136457	0.116406	0.118099	0.105227	0.12991	0.0619839	0.0972222	0.0566335	0.131428	0.0519847	0.121744	0.110214	0.102707	0.0859381	0.140549	0.13591	0.0238181
Otu0000106	0.0133552	0.0127339	0.461054	0.0112426	0.0115352	0.624384	0.515986	0.0127996	0.534785	0.00785273	0.578075	0.563056	0.00989654	0.00631069	0.469416	0.0059736	0.0182515	0.00831981	0.474104	0.489117	0.022849	0.580767	0.00624157	0.00599161	0.464697	0.539502	0.46546	0.572027	0.0111784	0.0124875	0.0153315	0.545541	0.00464141	0.476623	0.455965	0.0201498	0.596622	0.482874	0.0127315	0.456762	0.00292062	0.00792986	0.461153	0.417764	0.00704849	0.387164	0.371833	0.00295456	0.0139624
Otu0000107	0.120197	0.0950142	0.0975103	0.0885354	0.113704	0.0923385	0.0991875	0.101412	0.107533	0.102085	0.0858987	0.0782948	0.106163	0.114381	0.0819264	0.10852	0.131411	0.109198	0.135854	0.084927	0.123385	0.115152	0.11859	0.0970641	0.106665	0.118466	0.104771	0.0716126	0.128981	0.126124	0.130318	0.102501	0.123461	0.0999074	0.122207	0.0917934	0.112268	0.133965	0.0914352	0.103418	0.129481	0.0845852	0.118055	0.0871217	0.100693	0.114289	0.128985	0.128523	0.117448
Otu0000108	0.11784	0.141052	0.179122	0.204475	0.096401	0.15038	0.14034	0.191993	0.105613	0.157055	0.11666	0.234052	0.122357	0.147512	0.156103	0.29868	0.0827402	0.151837	0.157111	0.306681	0.106248	0.124164	0.159784	0.244458	0.106665	0.12567	0.136546	0.134492	0.0739492	0.109266	0.118394	0.116054	0.0807604	0.110906	0.11091	0.116421	0.0978332	0.143963	0.0983796	0.151433	0.100275	0.135689	0.146339	0.135406	0.0986789	0.12049	0.113863	0.115228	0.0344952
Otu0000109	0.0408513	0.0450583	0.0614739	0.0442677	0.0494364	0.0351766	0.0643664	0.0462753	0.0345642	0.04936	0.033663	0.0399803	0.0503824	0.0489079	0.0453916	0.0428108	0.0584048	0.0405591	0.0369672	0.0330272	0.0639773	0.0500661	0.0399461	0.0599161	0.0438237	0.0400224	0.0455154	0.0392996	0.0232166	0.0374625	0.0400324	0.0465912	0.046414	0.0540783	0.0318354	0.0402996	0.0336803	0.0409893	0.0462963	0.0467842	0.0399151	0.0484603	0.0602573	0.0503837	0.0513533	0.0407541	0.0596001	0.0443184	0.105128
Otu0000110	0.179903	0.130277	0.129307	0.0990753	0.149957	0.10553	0.135064	0.120119	0.151698	0.143593	0.110275	0.098285	0.163743	0.114381	0.12289	0.0955775	0.132628	0.131037	0.12384	0.122672	0.113103	0.113149	0.0986169	0.100659	0.138086	0.155287	0.141699	0.0899524	0.142739	0.124875	0.123504	0.106736	0.168019	0.148486	0.118099	0.101868	0.131514	0.112971	0.0983796	0.0911061	0.127534	0.122472	0.130352	0.12176	0.158088	0.153271	0.113863	0.121137	0.24968
Otu0000111	0.0856306	0.111666	0.0911509	0.115939	0.114528	0.13455	0.11607	0.0994427	0.128656	0.121156	0.125366	0.0957862	0.120558	0.112015	0.119568	0.0955775	0.12411	0.100878	0.109053	0.0912179	0.123385	0.122161	0.119838	0.104254	0.136432	0.117666	0.0824431	0.143225	0.133281	0.103022	0.107321	0.125373	0.0937564	0.0870753	0.0852366	0.144407	0.113871	0.118969	0.09375	0.120654	0.0905391	0.0978017	0.104528	0.109165	0.108748	0.116061	0.0827284	0.0842049	0.139624
Otu0000112	0.112341	0.12538	0.133547	0.141235	0.159021	0.1495	0.136119	0.102396	0.119054	0.115547	0.142778	0.116609	0.103464	0.13568	0.135068	0.117481	0.191032	0.128957	0.148793	0.122672	0.134809	0.135178	0.128576	0.0946675	0.143874	0.0800448	0.138264	0.138859	0.160797	0.162338	0.126059	0.0923353	0.0807604	0.10449	0.0893444	0.147765	0.10505	0.133965	0.109954	0.0726386	0.0954068	0.0704877	0.114366	0.100767	0.0956581	0.117833	0.0898449	0.0753413	0.132232
Otu0000113	0.0793458	0.053874	0.0773723	0.0765901	0.0848659	0.0870621	0.0664767	0.0797511	0.0672082	0.0774055	0.064424	0.0732973	0.097166	0.0780948	0.0642126	0.0577448	0.0632719	0.0821582	0.0646926	0.111663	0.0776868	0.0881163	0.0823888	0.0922708	0.0802057	0.0736412	0.0807255	0.0768525	0.0567517	0.0674326	0.0817682	0.08217	0.089115	0.0779095	0.0718863	0.090674	0.0882103	0.0659828	0.0694444	0.120654	0.0817773	0.0748932	0.0455004	0.0860721	0.0795473	0.0717627	0.0693851	0.090114	0.107592
Otu0000114	0.0298529	0.0254677	0.0349765	0.0203772	0.0181267	0.0219854	0.0263797	0.0354449	0.0192023	0.0280455	0.0243767	0.021656	0.0287899	0.0370753	0.0243565	0.0139384	0.0243353	0.0239195	0.0304979	0.0220181	0.0274189	0.0180238	0.0274629	0.0203715	0.0206716	0.0208117	0.0291986	0.0227064	0.0154777	0.02997	0.017035	0.0228721	0.023207	0.028414	0.0308084	0.0111943	0.0216516	0.0239938	0.0277778	0.0221609	0.0311533	0.018503	0.0270543	0.0293905	0.0201386	0.0327805	0.0222388	0.0428411	0.183975
Otu0000115	0.0015712	0.000979528	0.00423958	0.00281065	0.322985	0.00263824	0.294397	0	0.00288035	0	0.00290198	0.000832924	0.287	0.273726	0	0.335517	0.00243353	0.311993	0.00554508	0.00157272	0.00456981	0.328434	0.280871	0.315159	0.00578804	0.0016009	0.00171756	0.295184	0.000859875	0.00437063	0.000851752	0.00762402	0.00742625	0.354717	0.00410779	0.00223886	0.00240573	0.00199948	0.00231482	0.195755	0.00292062	0.000881096	0.00368922	0.296004	0.00100693	0.00354384	0.00444777	0.311706	0.00410657
Otu0000116	0.0597057	0.0861985	0.139906	0.110318	0.0502604	0.106409	0.0854701	0.134888	0.0528064	0.0964764	0.0708084	0.144929	0.0494827	0.0954492	0.127318	0.17423	0.0486707	0.0800782	0.0942664	0.143118	0.0434132	0.0891176	0.0761472	0.17136	0.0504387	0.0960538	0.114218	0.096939	0.06879	0.0886613	0.110728	0.104195	0.0556969	0.126488	0.111937	0.109704	0.0681625	0.104973	0.0833333	0.121885	0.0623065	0.116305	0.124204	0.127009	0.0724988	0.109859	0.0907344	0.121137	0.0509215
Otu0000117	0.114698	0.139093	0.118708	0.128587	0.14007	0.194351	0.139285	0.127011	0.156499	0.140227	0.135813	0.1366	0.118758	0.130947	0.125104	0.105534	0.119243	0.122717	0.134006	0.108518	0.149661	0.131173	0.123583	0.106651	0.124029	0.132074	0.13397	0.135365	0.123822	0.131119	0.157574	0.142315	0.129959	0.120989	0.146853	0.126496	0.14274	0.162958	0.122685	0.113267	0.114878	0.15243	0.121744	0.132257	0.125866	0.114289	0.105857	0.115228	0.101022
Otu0000118	0.080917	0.0822803	0.0720728	0.0723742	0.0667392	0.0800267	0.079139	0.084674	0.0768093	0.0706745	0.0777731	0.05414	0.0710751	0.0765171	0.0752837	0.0557536	0.0766563	0.0748783	0.0813279	0.0723452	0.0719745	0.0851123	0.0786438	0.0563212	0.0678028	0.076843	0.0601147	0.0611327	0.089427	0.0792957	0.0706955	0.0694633	0.065908	0.0568281	0.0708593	0.0884351	0.0769835	0.0819787	0.0671296	0.067714	0.0477034	0.0607956	0.0774736	0.0535326	0.0634364	0.0513856	0.057821	0.0576139	0.15605
Otu0000119	0.23568	0.105789	0.130367	0.147559	0.199394	0.15038	0.238472	0.186086	0.240029	0.183978	0.2043	0.139098	0.188934	0.181432	0.135068	0.192151	0.261605	0.256874	0.204244	0.128963	0.195359	0.199263	0.25216	0.248053	0.258808	0.121668	0.171756	0.134492	0.213249	0.136738	0.180572	0.182976	0.249708	0.13932	0.210524	0.128735	0.194865	0.0989743	0.179398	0.136659	0.220993	0.107494	0.253326	0.214131	0.184268	0.187823	0.21972	0.215683	0.0172476
Otu0000120	0.121768	0.109707	0.0858515	0.101886	0.103816	0.145103	0.0928564	0.12898	0.136337	0.11106	0.107373	0.105781	0.117859	0.109648	0.10739	0.0925907	0.135061	0.114397	0.113674	0.0802089	0.105106	0.118156	0.101113	0.0934691	0.133125	0.108061	0.0979011	0.124885	0.112644	0.103022	0.115838	0.110972	0.123461	0.0916582	0.0944791	0.102988	0.0954275	0.11497	0.0972222	0.110805	0.0983275	0.134808	0.119285	0.0881714	0.113783	0.103657	0.0889553	0.0753413	0.197116
Otu0000121	0.0526353	0.0910961	0.10175	0.238202	0.0535561	0.0879415	0.0886356	0.17624	0.057607	0.0942327	0.0911223	0.199069	0.0755735	0.086772	0.120675	0.234961	0.0571881	0.0634386	0.113674	0.301963	0.0559802	0.0740978	0.11859	0.287597	0.054573	0.0888498	0.0815843	0.111786	0.061911	0.0786713	0.0817682	0.097418	0.0621948	0.0769929	0.0821558	0.0962712	0.0673606	0.0879771	0.0740741	0.10588	0.0788567	0.0872285	0.0713249	0.104966	0.0644434	0.101885	0.100519	0.0945459	0.00492789
Otu0000122	0.0793458	0.10383	0.109169	0.125776	0.0922813	0.12048	0.127678	0.102396	0.0854504	0.105451	0.124785	0.115776	0.0890688	0.119903	0.145032	0.162283	0.0693557	0.111278	0.134006	0.171427	0.0913962	0.120159	0.149798	0.19293	0.0810326	0.114464	0.10563	0.0847125	0.104045	0.10989	0.114135	0.112666	0.103967	0.100824	0.116045	0.11866	0.0930218	0.128966	0.146991	0.153895	0.103195	0.147143	0.0971495	0.167946	0.0926373	0.0983415	0.104967	0.124091	0.0238181
Otu0000123	0.134338	0.180233	0.149445	0.132803	0.148309	0.186436	0.162499	0.169348	0.122895	0.16042	0.14684	0.153258	0.150247	0.149879	0.146139	0.10852	0.192249	0.143517	0.154338	0.130536	0.17251	0.160211	0.148549	0.106651	0.165373	0.156888	0.148569	0.186891	0.141019	0.147977	0.133725	0.140621	0.112322	0.129238	0.123234	0.146646	0.147552	0.168956	0.133102	0.145277	0.11001	0.156835	0.132812	0.12281	0.151039	0.142639	0.106746	0.0960232	0.059956
Otu0000124	0.0872018	0.0754236	0.0847916	0.130695	0.0840419	0.00263824	0.0759734	0.0945198	0.0892909	0.0706745	0.128848	0.0882899	0.080072	0.0583739	0.0941046	0.111507	0.0876072	0.0967178	0.120143	0.0629089	0.0822566	0.0821084	0.0986169	0.0982624	0.0777251	0.0616345	0.103054	0.0978123	0.0834079	0.128621	0.092841	0.102501	0.105824	0.103574	0.108856	0.105227	0.111466	0.0669826	0.112269	0.0824879	0.0934598	0.0528658	0.108217	0.103916	0.0865958	0.0903678	0.130764	0.137387	0.0788462
Otu0000125	0.0141408	0.0244882	0.0148385	0.0161612	0.0148309	0.0290207	0.0348211	0.0177225	0.0307237	0.0190709	0.0243767	0.0174914	0.014395	0.0173544	0.0188209	0.0268812	0.0267689	0.0249594	0.0129385	0.0220181	0.0205641	0.0190251	0.0287112	0.0239664	0.023979	0.0200112	0.0206108	0.0157198	0.0189172	0.01998	0.0187386	0.0186365	0.0167091	0.0128321	0.0246467	0.0201498	0.0208497	0.0179953	0.0196759	0.0110805	0.0262856	0.00881096	0.0319732	0.0293905	0.0151039	0.0203771	0.0240179	0.0177274	0.183975
Otu0000126	0.113127	0.162602	0.143086	0.147559	0.0898095	0.116962	0.131898	0.136857	0.117134	0.104329	0.123044	0.101617	0.110661	0.0922939	0.121782	0.155314	0.153313	0.115437	0.14602	0.149409	0.129097	0.0961269	0.107355	0.116237	0.1108	0.137677	0.148569	0.137112	0.105765	0.117383	0.107321	0.138927	0.0714776	0.129238	0.111937	0.141048	0.0994371	0.111971	0.145833	0.152664	0.112931	0.119829	0.126663	0.119661	0.125866	0.0992274	0.109415	0.132955	0.013141
Otu0000127	0.0911298	0.0989323	0.0869114	0.0941567	0.10464	0.130153	0.100243	0.0974736	0.0835302	0.0998418	0.101569	0.0916216	0.110661	0.107282	0.0952117	0.0935863	0.088824	0.0967178	0.0859488	0.113236	0.0868264	0.111147	0.0761472	0.125824	0.11328	0.120868	0.103054	0.113532	0.105765	0.0949051	0.0988033	0.116054	0.123461	0.0925748	0.103722	0.120899	0.117079	0.105972	0.0717593	0.0960307	0.116825	0.12071	0.104528	0.101817	0.112776	0.0815083	0.0889553	0.0930686	0.0952725
Otu0000128	0.153192	0.14497	0.145206	0.120858	0.17138	0.113444	0.150892	0.125042	0.16322	0.139105	0.149742	0.106614	0.135852	0.136469	0.136175	0.148344	0.171564	0.167436	0.142324	0.135254	0.140522	0.153202	0.147301	0.161774	0.164546	0.118466	0.131394	0.135365	0.149618	0.166084	0.149057	0.153327	0.202365	0.170484	0.166365	0.139929	0.196468	0.134965	0.157407	0.14774	0.167449	0.134808	0.173393	0.161648	0.178226	0.135552	0.169905	0.147728	0.0517428
Otu0000129	0.126482	0.141052	0.153685	0.196745	0.130183	0.142465	0.161443	0.166394	0.150738	0.132375	0.157868	0.194071	0.149348	0.154612	0.137282	0.215049	0.118026	0.125837	0.175594	0.169854	0.156516	0.154204	0.167274	0.153385	0.0950893	0.137677	0.14084	0.147592	0.155637	0.144231	0.135429	0.179588	0.141099	0.162235	0.164312	0.183587	0.161986	0.141963	0.152778	0.164976	0.155766	0.140975	0.184461	0.208882	0.141977	0.172762	0.202818	0.218637	0.00657052
Otu0000130	0.0188544	0.018611	0.0137786	0.0238905	0.0321337	0.0281413	0.0306004	0.0246145	0.0374446	0.0168273	0.0412082	0.0191572	0.0134953	0.0307646	0.0166067	0.0288724	0.0389365	0.0415991	0.0268012	0.0141545	0.0171368	0.028037	0.0337045	0.0479329	0.0214984	0.00960538	0.0188932	0.0183398	0.0421339	0.0305944	0.0161833	0.0237192	0.0454858	0.0265809	0.0205389	0.0279858	0.0280669	0.0199948	0.0277778	0.0233921	0.0467299	0.00969206	0.0172164	0.0304401	0.0211455	0.0168332	0.0373612	0.0295456	0.179047
Otu0000131	0.0691329	0.0695465	0.0551145	0.0625369	0.0584998	0.0369354	0.0759734	0.065967	0.0700885	0.0762836	0.0557181	0.0691327	0.0593792	0.048119	0.0575699	0.0378328	0.0584048	0.0623986	0.0609959	0.0157272	0.0377009	0.0550727	0.0511809	0.0299581	0.0835132	0.0576323	0.0815843	0.0480328	0.0705097	0.0586913	0.0664367	0.0660748	0.0686928	0.0769929	0.0790749	0.0682854	0.0681625	0.0379901	0.0671296	0.0393972	0.0623065	0.0440548	0.0590275	0.0535326	0.055381	0.0673329	0.0969613	0.0679549	0.24393
Otu0000132	0.0479217	0.0391811	0.0508749	0.0688608	0.0650913	0.0448501	0.0538145	0.0797511	0.0537665	0.0560909	0.0754515	0.0591376	0.0386865	0.0520632	0.058677	0.0726788	0.0474539	0.0686385	0.0619201	0.0597635	0.0582651	0.0670886	0.0724023	0.0599161	0.0463043	0.05363	0.0575384	0.0628794	0.0515925	0.0649351	0.072399	0.0779344	0.0649797	0.0742431	0.0739402	0.0593299	0.0537281	0.0529862	0.0543981	0.0430907	0.06328	0.045817	0.0590275	0.0734762	0.0503464	0.0584733	0.0542627	0.0782958	0.107592
Otu0000133	0.112341	0.183172	0.170643	0.13983	0.132654	0.158295	0.150892	0.135872	0.0998521	0.187344	0.124785	0.154091	0.155646	0.190898	0.125104	0.157305	0.126544	0.178876	0.154338	0.17929	0.11653	0.131173	0.148549	0.13541	0.102531	0.144081	0.174333	0.144099	0.105765	0.131119	0.141391	0.1762	0.116035	0.161318	0.185877	0.201498	0.113871	0.15196	0.133102	0.184674	0.102222	0.162122	0.182002	0.191038	0.11479	0.162131	0.161009	0.166933	0.0271034
Otu0000134	0.11784	0.100891	0.108109	0.0801034	0.14007	0.106409	0.0749182	0.0630132	0.130576	0.104329	0.0940242	0.101617	0.17274	0.114381	0.097426	0.0667052	0.111943	0.116477	0.113674	0.136827	0.148519	0.142188	0.107355	0.0910725	0.138913	0.148083	0.118512	0.118772	0.151338	0.136114	0.120097	0.125373	0.132744	0.14757	0.140692	0.107465	0.140335	0.15196	0.149306	0.187137	0.171343	0.164765	0.114366	0.139605	0.137949	0.151499	0.0889553	0.132955	0.00903446
Otu0000135	0.155549	0.140072	0.145206	0.15037	0.116176	0.140706	0.139285	0.113227	0.127696	0.131253	0.120142	0.157423	0.148448	0.141991	0.138389	0.136397	0.11681	0.132077	0.134006	0.108518	0.153089	0.126167	0.138563	0.13541	0.123203	0.152085	0.149428	0.138859	0.120382	0.132992	0.120949	0.201613	0.15131	0.138404	0.150961	0.170154	0.129108	0.141963	0.135417	0.144046	0.153819	0.142738	0.127893	0.137505	0.139963	0.146183	0.135212	0.122614	0.0279247
Otu0000136	0.0958434	0.070526	0.109169	0.149667	0.118647	0.0641973	0.125567	0.120119	0.120975	0.11106	0.136393	0.105781	0.0881691	0.102549	0.0874619	0.112503	0.105859	0.137277	0.121992	0.0770634	0.110818	0.132174	0.132321	0.134212	0.114934	0.0568318	0.121947	0.126632	0.129841	0.147353	0.135429	0.134691	0.133672	0.115489	0.165338	0.13769	0.153967	0.0889769	0.116898	0.0984931	0.148951	0.0511036	0.14388	0.107065	0.11479	0.0779644	0.153003	0.150683	0.0706331
Otu0000137	0.215255	0.149868	0.222578	0.170747	0.172204	0.0949768	0.130843	0.106335	0.153619	0.122278	0.189209	0.157423	0.231219	0.134102	0.15721	0.110512	0.127761	0.166396	0.211637	0.184009	0.187362	0.158209	0.146053	0.12822	0.146355	0.156087	0.154581	0.131872	0.147039	0.20979	0.15076	0.139774	0.117892	0.13932	0.124261	0.0884351	0.135523	0.0989743	0.142361	0.0947996	0.160634	0.0933962	0.137731	0.111264	0.195344	0.16656	0.175242	0.171364	0.0139624
Otu0000138	0.0487073	0	0.0635937	0.000702662	0	0.0492472	0	0.0383987	0	0.0527255	0.000580397	0	0.0449843	0.0457525	0	0	0.0742228	0	0	0.0471817	0.0022849	0.0550727	0.0661607	0.0491312	0	0	0	0.0454129	0.0593314	0.0474525	0.0545122	0	0	0.000916582	0.0492935	0.049255	0	0.0589847	0.0636574	0	0	0	0	0.0367381	0.0453117	0.0504997	0	0	0.164263
Otu0000139	0.0015712	0	0	0	0	0	0	0	0.000960117	0.00112182	0.000580397	0	0.000899685	0	0	0	0.00121677	0.00727984	0	0	0	0.00200264	0	0	0.00248059	0.00640359	0.00257635	0.0034933	0	0.00499501	0.00425876	0.00254134	0	0.000916582	0	0.00111943	0	0.00699818	0.0150463	0.0184674	0.000973539	0.00704877	0.0122974	0.0146952	0	0.0044298	0.00355821	0.00443184	0.00164263
Otu0000140	0.111555	0.137134	0.124008	0.0878327	0.111232	0.1495	0.0780838	0.0836894	0.0912111	0.132375	0.0911223	0.0957862	0.127755	0.121481	0.0808193	0.0766612	0.0815234	0.0956779	0.0933422	0.0723452	0.105106	0.103136	0.0898787	0.0683044	0.102531	0.14328	0.138264	0.137112	0.104905	0.104271	0.118394	0.113513	0.110465	0.129238	0.125288	0.09851	0.0962294	0.15396	0.114583	0.157589	0.102222	0.147143	0.110677	0.144853	0.129894	0.127578	0.124537	0.13591	0.0878807
Otu0000141	0.125696	0.130277	0.152625	0.143343	0.121119	0.147742	0.115015	0.158518	0.126735	0.142471	0.126526	0.179912	0.111561	0.12858	0.129532	0.170248	0.0973414	0.139357	0.144172	0.128963	0.129097	0.118156	0.136066	0.158179	0.103358	0.131274	0.143417	0.145845	0.114363	0.118631	0.163536	0.168575	0.146668	0.138404	0.15815	0.164557	0.117881	0.122968	0.148148	0.162514	0.136295	0.149786	0.136501	0.165846	0.11479	0.155929	0.15834	0.192046	0.0147837
Otu0000142	0.0416369	0.0362425	0.0360364	0.0400517	0.055204	0.046609	0.0400971	0.0433216	0.0441654	0.0381418	0.0388866	0.044145	0.0413855	0.0402307	0.038749	0.0477888	0.0450204	0.043679	0.0378914	0.0235908	0.0468405	0.056074	0.043691	0.0467346	0.0562267	0.0512287	0.027481	0.0305664	0.0533122	0.0437063	0.0417359	0.0465912	0.0566251	0.039413	0.039024	0.0526133	0.0425013	0.0559854	0.0405093	0.0418595	0.0642536	0.0299573	0.0430409	0.0472347	0.0302078	0.0398682	0.0435881	0.026591	0.161799
Otu0000143	0.0824882	0.0666079	0.0561744	0.0604289	0.0988728	0.082665	0.0875805	0.0945198	0.0796897	0.0953546	0.0864791	0.0891228	0.0746739	0.0733618	0.0597841	0.0806436	0.0803066	0.0582387	0.0914938	0.0707725	0.095966	0.0991309	0.087382	0.100659	0.0868206	0.0560314	0.0790079	0.0777259	0.0928665	0.0892857	0.0732507	0.0889469	0.0854019	0.061411	0.0924252	0.0817186	0.0858046	0.0579849	0.0798611	0.0664828	0.0846979	0.0396493	0.0934602	0.0608802	0.0946512	0.0708767	0.0907344	0.104887	0.0944512
Otu0000144	0.126482	0.148888	0.146265	0.152478	0.201865	0.133671	0.176216	0.134888	0.183382	0.166029	0.2043	0.161587	0.152047	0.141991	0.19928	0.110512	0.193466	0.178876	0.178367	0.147836	0.220493	0.168222	0.151046	0.13541	0.22408	0.191307	0.174333	0.196498	0.242485	0.206668	0.21379	0.1762	0.17823	0.180567	0.185877	0.222767	0.249395	0.203947	0.180556	0.12681	0.171343	0.157716	0.178312	0.132257	0.211455	0.167446	0.177911	0.159546	0.0377805
Otu0000145	0.0746321	0.0636693	0.108109	0.133506	0.0519082	0.0773885	0.108684	0.142764	0.0854504	0.105451	0.0882203	0.154091	0.0665767	0.0844055	0.12289	0.128432	0.0535378	0.0935979	0.110902	0.100654	0.073117	0.0811071	0.124831	0.110246	0.0686296	0.0680381	0.0979011	0.103926	0.0584715	0.0568182	0.0936928	0.116902	0.052912	0.0769929	0.139665	0.115302	0.0641529	0.0579849	0.099537	0.120654	0.050624	0.0704877	0.100839	0.109165	0.0573949	0.0947976	0.111194	0.121137	0.0114984
Otu0000146	0.128839	0.113625	0.158984	0.146154	0.107936	0.122239	0.118181	0.178209	0.109453	0.130131	0.107373	0.164086	0.112461	0.129369	0.119568	0.153322	0.105859	0.118557	0.124764	0.177718	0.0993934	0.162214	0.154791	0.170162	0.112453	0.166493	0.117653	0.150212	0.110064	0.109266	0.112431	0.160104	0.110465	0.140237	0.105776	0.147765	0.119485	0.119969	0.143519	0.185906	0.134348	0.170933	0.131582	0.119661	0.121838	0.131122	0.137881	0.141819	0.00821315
Otu0000147	0.0989858	0.10383	0.090091	0.0751848	0.0914574	0.093218	0.0601456	0.0639978	0.0969718	0.109938	0.0847379	0.0608034	0.109762	0.0749395	0.0907833	0.0866172	0.0547545	0.0800782	0.0536025	0.0676271	0.0982509	0.0781031	0.0823888	0.0659077	0.101704	0.0864484	0.115077	0.100432	0.106624	0.0824176	0.0868788	0.117749	0.0770473	0.0843255	0.0924252	0.082838	0.0946256	0.0969748	0.106481	0.103418	0.0876185	0.0969206	0.0971495	0.125959	0.0825681	0.0903678	0.101409	0.0960232	0.0870594
Otu0000148	0.0290673	0.0440788	0.0773723	0.0491863	0.0288379	0.0395737	0.0548697	0.0551366	0.0336041	0.0448727	0.0650044	0.0774619	0.0431849	0.0220874	0.0420703	0.0507756	0.0352862	0.043679	0.0554508	0.0487544	0.0331311	0.0360476	0.0486843	0.037148	0.0339014	0.023213	0.0403627	0.0410462	0.0223567	0.0462038	0.0553639	0.0169423	0.023207	0.0348301	0.0646977	0.041419	0.0304726	0.0319917	0.0393519	0.0357037	0.0146031	0.0220274	0.0319732	0.052483	0.0191316	0.0363243	0.0320239	0.036932	0.156871
Otu0000149	0.0746321	0.0930551	0	0.0758875	0.119471	0.116962	0.0801942	0.0935352	0.115214	0.0684309	0.115499	0.0699656	0.0530814	0.105704	0.0852477	0.0726788	0.130194	0	0.10166	0.0833543	0.108533	0.122161	0.0936236	0.110246	0.102531	0.0864484	0.000858782	0.100432	0.131561	0.112388	0.103914	0.0923353	0.128103	0.100824	0	0.11866	0.132315	0.095975	0.0821759	0.0775633	0.110983	0	0.0983792	0.0682279	0.0996858	0.0744206	0.0960717	0.0886368	0.0960938
Otu0000150	0.0274961	0.0235087	0.0180182	0.0175665	0.0428449	0.0219854	0.016883	0.0246145	0.0297636	0.0224364	0.0197335	0.0158256	0.0260909	0.0244539	0.0254636	0.0159296	0.0194683	0.0207995	0.0249529	0.0361726	0.0456981	0.0330436	0.0187247	0.0179748	0.0305939	0.0216121	0.0309161	0.0279464	0.0421339	0.034965	0.0264043	0.0338845	0.0491989	0.0339135	0.0225928	0.0268664	0.0473128	0.026993	0.025463	0.0283168	0.036021	0.0352438	0.0245948	0.0377877	0.0432979	0.0265788	0.0240179	0.0295456	0.103486
Otu0000151	0.0345665	0.0382016	0.0254375	0.0505916	0.0247182	0.000879415	0.0390419	0.0502137	0.0201625	0.0336545	0.0400474	0.0341499	0.0323887	0.000788836	0	0.000995599	0.00486707	0.0363992	0.00092418	0.00157272	0.025134	0	0.0312079	0	0.0347283	0.0400224	0.0291986	0.0532728	0	0.0424575	0.0528087	0.0474383	0	0.0540783	0.0492935	0.057091	0	0	0.0300926	0	0	0.0246707	0.0418112	0.0230925	0.0292009	0.0159473	0.0364717	0	0.195473
Otu0000152	0.185402	0.0852189	0.10069	0.0969673	0.192802	0.0853032	0.143505	0.0866432	0.183382	0.116669	0.130589	0.0682998	0.188934	0.123058	0.101854	0.134406	0.217801	0.157036	0.142324	0.0833543	0.18165	0.131173	0.147301	0.129419	0.202581	0.0784439	0.108207	0.096939	0.213249	0.162962	0.110728	0.0991122	0.212576	0.134738	0.136584	0.101868	0.190053	0.0939756	0.114583	0.0627893	0.174264	0.0713688	0.14142	0.111264	0.164129	0.124034	0.153003	0.125569	0.0706331
Otu0000153	0.0824882	0.0793418	0.0975103	0.106102	0.0733307	0.0598002	0.0918012	0.0787665	0.0672082	0.0852582	0.103311	0.0774619	0.0917679	0.0986045	0.0719624	0.0686964	0.0827402	0.090478	0.108129	0.0660544	0.0719745	0.0811071	0.102362	0.0922708	0.0628416	0.0864484	0.074714	0.107419	0.0627709	0.0924076	0.096248	0.0864055	0.0974695	0.0962411	0.109883	0.0705242	0.0946256	0.0809789	0.105324	0.0898749	0.0691213	0.0669633	0.0934602	0.0965687	0.0684711	0.0885959	0.104078	0.113751	0.0821315
Otu0000154	0.0785601	0.0715055	0.0625338	0.041457	0.0725068	0.0853032	0.0612008	0.0462753	0.0537665	0.0830146	0.0603612	0.065801	0.0836707	0.0686288	0.0653197	0.059736	0.0425868	0.042639	0.0619201	0.0534726	0.0754019	0.0520687	0.0399461	0.0287597	0.0587073	0.0584327	0.0601147	0.0480328	0.0584715	0.0505744	0.0613262	0.0609921	0.0575534	0.0568281	0.0564821	0.0503745	0.0529262	0.0449883	0.0543981	0.075101	0.0691213	0.0810608	0.0725547	0.0745258	0.0704849	0.0664469	0.0533732	0.0975004	0.0804888
Otu0000155	0.0549921	0.0548536	0.0413359	0.0512943	0.0766265	0.0422119	0.0400971	0.0620286	0.0624076	0.0437509	0.0504945	0.0466437	0.0791723	0.0583739	0.078605	0.0527668	0.0644887	0.0530388	0.0720861	0.0644816	0.0822566	0.0750991	0.0686573	0.070701	0.072764	0.069639	0.0618323	0.0689926	0.0705097	0.078047	0.0502534	0.0516739	0.0937564	0.0577447	0.0626438	0.0738825	0.104249	0.0789795	0.0636574	0.0997242	0.0671742	0.0757743	0.0700952	0.0650789	0.11479	0.064675	0.0809493	0.073864	0.0681691
Otu0000156	0.0172832	0.0411402	0.0487552	0.0344304	0.0255422	0.0413325	0.0316556	0.0492291	0.0192023	0.0358982	0.0296002	0.0358157	0.0197931	0.0323423	0.0243565	0.0358416	0.020685	0.0249594	0.0175594	0.0424635	0.025134	0.0320423	0.0249663	0.0479329	0.0223253	0.0496278	0.0403627	0.0497795	0.0232166	0.0293457	0.0459946	0.0381201	0.0213505	0.0403296	0.0297815	0.0447773	0.0200478	0.0439886	0.0266204	0.0517089	0.025312	0.0414115	0.0307435	0.0293905	0.0322217	0.0398682	0.0293553	0.0413638	0.0681691
Otu0000157	0.0604913	0.0636693	0.0614739	0.0667529	0.0667392	0.0685943	0.0580352	0.0777819	0.073929	0.0639436	0.0893811	0.0616364	0.0557805	0.0891385	0.0708552	0.0836304	0.0632719	0.0779983	0.0859488	0.0691998	0.0594075	0.0640846	0.0811405	0.0910725	0.0802057	0.0616345	0.0695613	0.0777259	0.0730894	0.0774226	0.101359	0.0711575	0.089115	0.089825	0.0893444	0.0817186	0.0842007	0.07698	0.087963	0.0664828	0.0856714	0.0511036	0.0713249	0.0661285	0.0735057	0.0699908	0.104078	0.0975004	0.0788462
Otu0000158	0.140623	0.110687	0.10493	0.0990753	0.112056	0.10553	0.103408	0.0748282	0.0979319	0.112182	0.095185	0.0949533	0.134953	0.0883497	0.0918904	0.10852	0.119243	0.0998378	0.0988873	0.105372	0.0856839	0.0921216	0.11859	0.0802876	0.1108	0.124069	0.102195	0.0829658	0.120382	0.101773	0.114987	0.103348	0.127174	0.114573	0.107829	0.124257	0.115475	0.0879771	0.100694	0.0824879	0.119745	0.091634	0.104528	0.127009	0.132914	0.111631	0.131654	0.0723867	0.121555
Otu0000159	0.0919154	0.0734646	0.109169	0.113831	0.0898095	0.0817856	0.0865253	0.119134	0.073929	0.0796491	0.0789339	0.104948	0.105263	0.0946604	0.0863548	0.144362	0.0863905	0.0967178	0.118295	0.16199	0.0948235	0.0961269	0.0836371	0.1426	0.0802057	0.0992556	0.0927484	0.118772	0.0911467	0.103022	0.086027	0.111819	0.0965412	0.103574	0.106802	0.0951517	0.0946256	0.0929758	0.130787	0.104649	0.0924862	0.0969206	0.105758	0.110214	0.0755196	0.0974555	0.110305	0.110796	0.0188902
Otu0000160	0.103699	0.121461	0.109169	0.111723	0.106288	0.112565	0.0991875	0.111258	0.0969718	0.130131	0.0998282	0.116609	0.0962663	0.112804	0.129532	0.146353	0.0790899	0.091518	0.0813279	0.102227	0.0651198	0.0971282	0.0986169	0.0635111	0.111627	0.127271	0.142558	0.0908257	0.116943	0.0899101	0.115838	0.115207	0.0844736	0.118239	0.102695	0.116421	0.0697663	0.0939756	0.107639	0.0886438	0.0954068	0.102207	0.105758	0.0944693	0.105727	0.0992274	0.0862867	0.122614	0.0344952
Otu0000161	0.0447793	0.0362425	0.0392161	0.0758875	0.0387252	0.0474884	0.0643664	0.0600595	0.0528064	0.0437509	0.0562985	0.0499754	0.0476833	0.043386	0.0708552	0.064714	0.0486707	0.044719	0.0397398	0.0550453	0.047983	0.0520687	0.0411944	0.040743	0.0463043	0.0448251	0.0541033	0.0654993	0.0498727	0.0505744	0.0519569	0.0491326	0.0380595	0.0595778	0.058536	0.0604493	0.0553319	0.0409893	0.0486111	0.0578647	0.036021	0.0511036	0.0504193	0.0472347	0.0352425	0.0487278	0.0515941	0.0590912	0.110056
Otu0000162	0.118626	0.109707	0.069953	0.111723	0.126887	0.107289	0.102353	0.138826	0.141137	0.118913	0.130009	0.110779	0.127755	0.0970269	0.106283	0.0975687	0.142362	0.135197	0.149717	0.102227	0.1211	0.122161	0.152294	0.154584	0.145528	0.108861	0.116794	0.0890791	0.159937	0.116758	0.125208	0.121137	0.130888	0.102657	0.123234	0.127615	0.122692	0.0929758	0.113426	0.0775633	0.124613	0.0775365	0.109447	0.09237	0.112776	0.0974555	0.106746	0.101932	0.0418871
Otu0000163	0.084845	0.0959937	0.0975103	0.0491863	0.083218	0.138068	0.0527593	0.0531674	0.0844903	0.102085	0.0609416	0.0524742	0.120558	0.0844055	0.0664268	0.0786524	0.088824	0.0925579	0.0702377	0.056618	0.109675	0.10614	0.0711539	0.0718993	0.0884744	0.108061	0.0738552	0.0890791	0.0842677	0.0861638	0.0655849	0.0516739	0.100254	0.083409	0.0883175	0.0727631	0.0986351	0.101973	0.0868056	0.121885	0.0846979	0.147143	0.0971495	0.0934197	0.10472	0.108087	0.0880658	0.113751	0.0501002
Otu0000164	0.0879874	0.135175	0.113409	0.131398	0.131007	0.175004	0.122402	0.140795	0.143057	0.117791	0.140456	0.119941	0.0944669	0.153034	0.168281	0.0915951	0.155746	0.136237	0.12384	0.141545	0.123385	0.15921	0.157288	0.131815	0.119068	0.147282	0.108207	0.132745	0.149618	0.147353	0.162685	0.103348	0.11325	0.131988	0.0985869	0.141048	0.151561	0.176954	0.16088	0.113267	0.122666	0.173576	0.124204	0.104966	0.119824	0.124034	0.112973	0.0886368	0.0353165
Otu0000165	0.100557	0.0930551	0.0837317	0.0906434	0.0906334	0.0879415	0.0991875	0.0738436	0.0787296	0.0729182	0.0864791	0.076629	0.104363	0.10176	0.0730695	0.07467	0.0669222	0.0759183	0.0591475	0.0676271	0.0742594	0.0781031	0.0499326	0.0599161	0.0802057	0.10646	0.0961836	0.108292	0.109204	0.0792957	0.086027	0.0838642	0.082617	0.089825	0.100641	0.0794797	0.0753797	0.0829784	0.0671296	0.0911061	0.0710684	0.119829	0.0725547	0.09237	0.0956581	0.0770785	0.0667165	0.0827276	0.130589
Otu0000166	0.0667761	0.0754236	0.0392161	0.0688608	0.0782743	0.0694738	0.0706975	0.0511982	0.0787296	0.0818927	0.0737104	0.0624693	0.0503824	0.0709953	0.0719624	0.059736	0.0474539	0.088398	0.066541	0.0676271	0.0993934	0.0801057	0.0798921	0.0802876	0.100877	0.0568318	0.0583972	0.0593861	0.0911467	0.0686813	0.072399	0.0643806	0.11325	0.0742431	0.0605899	0.0526133	0.0745778	0.0879771	0.0833333	0.0381661	0.0983275	0.0801797	0.0737844	0.0671782	0.0956581	0.0637891	0.0845075	0.0694321	0.0632412
Otu0000167	0.0903442	0.051915	0.0551145	0.0541049	0.0749786	0.0439707	0.0432626	0.0344604	0.0720088	0.0482382	0.0597808	0.0524742	0.0575798	0.0583739	0.0597841	0.0567492	0.0511042	0.0571987	0.0702377	0.045609	0.0948235	0.0510674	0.0599191	0.0695027	0.0595341	0.0488273	0.0506681	0.0585127	0.0627709	0.0680569	0.0502534	0.0567566	0.0983978	0.0669105	0.0718863	0.0660465	0.0930218	0.0549857	0.0833333	0.0393972	0.0749625	0.0660822	0.0344327	0.0503837	0.0775334	0.0788504	0.0711642	0.0812504	0.120733
Otu0000168	0.118626	0.140072	0.136726	0.116642	0.143366	0.131912	0.101298	0.127011	0.137297	0.176125	0.106213	0.114111	0.130454	0.130158	0.143925	0.117481	0.0912575	0.137277	0.11275	0.146263	0.142807	0.147194	0.132321	0.130617	0.148008	0.138478	0.13397	0.153705	0.120382	0.121753	0.114987	0.11436	0.152238	0.137487	0.126314	0.144407	0.113871	0.145962	0.125	0.152664	0.139216	0.157716	0.14388	0.137505	0.126873	0.159473	0.141439	0.121137	0.013141
Otu0000169	0.0604913	0.0597512	0.040276	0.0365384	0.0461407	0.0606796	0.033766	0.0521828	0.0547267	0.0605782	0.0423689	0.05414	0.0449843	0.0504855	0.0420703	0.0228988	0.052321	0.046799	0.0517541	0.0518998	0.06055	0.0761005	0.0486843	0.0323547	0.0520924	0.0592332	0.0403627	0.0567661	0.0558919	0.0418332	0.0596227	0.0626864	0.0408444	0.0476623	0.0328623	0.0458967	0.0449071	0.0469878	0.0358796	0.0467842	0.0584124	0.06432	0.0430409	0.052483	0.0402771	0.0389822	0.0329135	0.0472729	0.128125
Otu0000170	0.146907	0.108728	0.117648	0.117345	0.125239	0.0773885	0.124512	0.107319	0.120015	0.11106	0.14568	0.104948	0.128655	0.143568	0.109604	0.148344	0.105859	0.151837	0.158035	0.0817816	0.132524	0.145192	0.138563	0.134212	0.130644	0.0976547	0.113359	0.110039	0.126402	0.136738	0.123504	0.128761	0.129959	0.0962411	0.106802	0.132093	0.121089	0.095975	0.113426	0.0935684	0.128507	0.0801797	0.106987	0.131207	0.153053	0.116061	0.141439	0.150683	0.0229968
Otu0000171	0.0259248	0.0479969	0.0233177	0.0400517	0.0304858	0.0184677	0.0432626	0.0344604	0.0211226	0.0336545	0.0470121	0.0266536	0.031489	0.0362865	0.0232494	0.034846	0.0316359	0.0384791	0.0517541	0.00157272	0.022849	0.031041	0.0486843	0.040743	0.0405163	0.0368206	0.0532445	0.0454129	0.0352549	0.0586913	0.0366254	0.0389672	0.0399161	0.0384964	0.0482665	0.0347024	0.0376899	0.0299922	0.0428241	0.0332414	0.0438093	0.0352438	0.0233651	0.0472347	0.042291	0.0336665	0.0453672	0.0546593	0.086238
Otu0000172	0.0565633	0.0626898	0.0508749	0.0822114	0.0584998	0.0413325	0.0580352	0.0708899	0.0662481	0.0549691	0.0696476	0.0583047	0.0566802	0.0765171	0.0608912	0.0716832	0.0401533	0.0270394	0.0388156	0.0251636	0.0262764	0.0490648	0.0362011	0.0323547	0.0578804	0.046426	0.0489506	0.0480328	0.0498727	0.0743007	0.0783612	0.0635335	0.0686928	0.0586612	0.0739402	0.0537327	0.0689644	0.0479875	0.0578704	0.0406284	0.0730154	0.045817	0.0467301	0.0388374	0.0443048	0.0513856	0.0711642	0.063523	0.0993791
Otu0000173	0.179117	0.160643	0.149445	0.151072	0.22576	0.242718	0.138229	0.169348	0.00192023	0.00224364	0.185727	0.00249877	0.00449843	0.222452	0.198173	0.0059736	0.00608384	0.187196	0.146945	0.00629089	0.221636	0.00700925	0.171019	0.20012	0.217465	0.211318	0.138264	0.151085	0.189172	0.201049	0.205272	0.149939	0.287767	0.164068	0.00718863	0.167915	0.23496	0.22894	0.152778	0.195755	0.247279	0.296048	0.163555	0.167946	0.230586	0.195797	0.162788	0.138864	0.0139624
Otu0000174	0.0510641	0.0636693	0.0731327	0.0590236	0.0584998	0.061559	0.0801942	0.0679361	0.0508862	0.0560909	0.0737104	0.0591376	0.0557805	0.0694176	0.0664268	0.0537624	0.0401533	0.0790382	0.0674652	0.0629089	0.0685471	0.0610806	0.0649124	0.0635111	0.0644953	0.0640359	0.0687026	0.0681193	0.0567517	0.0911588	0.0732507	0.0499797	0.052912	0.0650773	0.0790749	0.0805991	0.0649549	0.0599844	0.0659722	0.0566335	0.0447828	0.0484603	0.0676357	0.0703272	0.0573949	0.0664469	0.0773911	0.0827276	0.121555
Otu0000175	0.107627	0.0950142	0.0837317	0.111021	0.109584	0.107289	0.112905	0.119134	0.118094	0.11106	0.119562	0.111612	0.0836707	0.123847	0.135068	0.0945819	0.0863905	0.101918	0.082252	0.0880725	0.0799717	0.118156	0.0836371	0.0982624	0.112453	0.100856	0.10563	0.118772	0.119523	0.113636	0.137132	0.11436	0.121605	0.132904	0.117072	0.136571	0.106654	0.0849779	0.122685	0.0664828	0.121692	0.0801797	0.09469	0.0976183	0.122845	0.108973	0.110305	0.150683	0.0386018
Otu0000176	0.0557777	0.070526	0.0688932	0.0555103	0.0543801	0.0554031	0.0485386	0.0462753	0.0691284	0.0617	0.0528161	0.0741302	0.0620783	0.0465413	0.0608912	0.0507756	0.0413701	0.0561587	0.0388156	0.0723452	0.0365585	0.0680899	0.0424427	0.0323547	0.036382	0.0632354	0.0523857	0.0637527	0.0533122	0.0518232	0.0494016	0.067769	0.0334181	0.0549949	0.0297815	0.0391801	0.0344822	0.045988	0.0474537	0.0357037	0.0515976	0.0449359	0.0602573	0.0556319	0.0503464	0.0593593	0.0346926	0.0443184	0.152765
Otu0000177	0.0322097	0.0264473	0.0233177	0.0309171	0.0387252	0.0202265	0.0316556	0.0285529	0.0153619	0.0258018	0.027859	0.0241548	0.0215924	0.0141991	0.0365347	0.0318592	0.0316359	0.0259994	0.0268012	0.0235908	0.0274189	0.0290383	0.0362011	0.0191732	0.0339014	0.0216121	0.0171756	0.0314397	0.034395	0.0418332	0.0238491	0.0169423	0.0482706	0.0421628	0.0287545	0.0257469	0.0376899	0.0179953	0.025463	0.0221609	0.0194708	0.0132164	0.0245948	0.0272911	0.041284	0.0132894	0.0462568	0.0295456	0.23736
Otu0000178	0.0589201	0.0499559	0.0519348	0.0562129	0.0675631	0.0545237	0.0580352	0.0590749	0.0604874	0.04936	0.067326	0.0391474	0.0449843	0.0702064	0.0420703	0.07467	0.073006	0.0655185	0.0628443	0.0377453	0.070832	0.0440582	0.0536775	0.0539245	0.0768983	0.0440247	0.0506681	0.0489062	0.0730894	0.0686813	0.0519569	0.0720046	0.0677645	0.0687436	0.0616168	0.0649271	0.0721721	0.0569852	0.0543981	0.0554023	0.0798302	0.0405304	0.0590275	0.0577313	0.0523602	0.0602452	0.0569314	0.0827276	0.0969151
Otu0000179	0.0950578	0.111666	0.154745	0.165828	0.105464	0.093218	0.109739	0.163441	0.0768093	0.104329	0.13117	0.129103	0.101664	0.0993934	0.10739	0.162283	0.0790899	0.106078	0.1414	0.180863	0.095966	0.115152	0.143556	0.147394	0.0760714	0.0944529	0.122806	0.0934457	0.0945862	0.108641	0.092841	0.135538	0.101183	0.137487	0.139665	0.113063	0.090616	0.0889769	0.111111	0.161282	0.112931	0.0960395	0.113136	0.136456	0.0986789	0.107201	0.13966	0.122614	0.0106771
Otu0000180	0.131195	0.123421	0.10069	0.0808061	0.13183	0.106409	0.0918012	0.0620286	0.118094	0.169395	0.0940242	0.098285	0.176338	0.113592	0.105176	0.118476	0.109509	0.128957	0.113674	0.100654	0.167941	0.129171	0.1111	0.113841	0.132298	0.152085	0.152863	0.136239	0.128121	0.128621	0.117542	0.142315	0.153166	0.146653	0.156096	0.113063	0.145146	0.112971	0.15162	0.185906	0.130454	0.130402	0.146339	0.177392	0.14097	0.132894	0.161899	0.165455	0.00328526
Otu0000181	0.0141408	0.0254677	0.049815	0.0323224	0.0205985	0.0439707	0.0527593	0.0571057	0.0182422	0.04936	0.036565	0.0558059	0.0323887	0.0402307	0.0276778	0.044802	0.00973414	0.043679	0.0425123	0.0298817	0.0319887	0.0300397	0.0312079	0.0359497	0.023979	0.0416233	0.0437979	0.0410462	0.00773887	0.0474525	0.0391806	0.0415085	0.0176373	0.0430793	0.0554551	0.0447773	0.018444	0.0259932	0.0300926	0.0430907	0.0204443	0.0290762	0.0356625	0.046185	0.0201386	0.0380963	0.0222388	0.0339774	0.0583133
Otu0000182	0.128839	0.100891	0.148385	0.08713	0.110408	0.0853032	0.0875805	0.109289	0.101772	0.0964764	0.10273	0.0849582	0.156545	0.0946604	0.0741766	0.136397	0.111943	0.091518	0.106281	0.116381	0.122242	0.103136	0.123583	0.119832	0.109146	0.0832466	0.0927484	0.094319	0.0920066	0.0892857	0.096248	0.0889469	0.103967	0.0989908	0.112964	0.0783603	0.10505	0.0839782	0.113426	0.13789	0.122666	0.113661	0.106987	0.103916	0.153053	0.112517	0.114752	0.113751	0.00821315
Otu0000183	0.0479217	0.0303654	0.0286172	0.049889	0.041197	0.0246236	0.0422075	0.0413524	0.0499261	0.0415073	0.0452709	0.0341499	0.0386865	0.0402307	0.038749	0.0557536	0.0340695	0.0384791	0.0434365	0.0440362	0.0342736	0.0300397	0.0399461	0.0515279	0.0429969	0.0152085	0.0498094	0.0366796	0.0386944	0.0455794	0.0264043	0.0245663	0.029705	0.039413	0.0503204	0.0425384	0.0513224	0.0169956	0.0393519	0.0307791	0.0282326	0.018503	0.0491896	0.043036	0.0302078	0.0363243	0.049815	0.0812504	0.101843
Otu0000184	0.112341	0.148888	0.0996301	0.127182	0.148309	0.157415	0.160388	0.0807357	0.142097	0.133496	0.16077	0.100784	0.106163	0.15619	0.132854	0.0995599	0.223885	0.148717	0.139551	0.100654	0.133667	0.14419	0.144805	0.103056	0.131471	0.112063	0.14084	0.127505	0.184873	0.146104	0.175461	0.0906411	0.115107	0.122822	0.108856	0.130974	0.137929	0.134965	0.121528	0.0738698	0.0973539	0.0969206	0.103298	0.102867	0.0926373	0.114289	0.107636	0.0797731	0.0410657
Otu0000185	0.0872018	0.068567	0.0551145	0.135614	0.110408	0.102892	0.108684	0.123073	0.0969718	0.0897455	0.120142	0.0941204	0.0818713	0.100971	0.10739	0.147349	0.0790899	0.0811182	0.136779	0.14469	0.110818	0.104137	0.134818	0.161774	0.0959161	0.085648	0.117653	0.110912	0.104045	0.107393	0.106469	0.116902	0.154095	0.0797426	0.102695	0.123138	0.125098	0.11397	0.106481	0.104649	0.110983	0.106613	0.121744	0.12176	0.116804	0.103657	0.134323	0.109319	0.0164263
Otu0000186	0.0494929	0.0430992	0.0445156	0.0400517	0.0304858	0.0325383	0.0474834	0.018707	0.0374446	0.0302891	0.036565	0.033317	0.0467836	0.0315535	0.0343205	0.034846	0.0498874	0.0571987	0.0480574	0.028309	0.0525528	0.0430568	0.0486843	0.0359497	0.0347283	0.0432242	0.0446567	0.0392996	0.0515925	0.0574426	0.0451429	0.0355787	0.0417726	0.0485788	0.0462126	0.0380607	0.0408975	0.0209945	0.0486111	0.0406284	0.0321268	0.0387682	0.0418112	0.0409367	0.0543741	0.0540435	0.0587105	0.0443184	0.0903446
Otu0000187	0.0015712	0.00783622	0.146265	0.165828	0.168084	0.00527649	0.186768	0.00590749	0.00864105	0.00448727	0.00580397	0.132435	0.149348	0.199576	0.00664268	0.156309	0.155746	0.177836	0.19685	0.116381	0.195359	0.217287	0.00499326	0.201318	0.0066149	0.00560314	0.00429391	0.00611327	0.20723	0.20542	0.00596227	0.00508268	0.00464141	0.00549949	0.175608	0.158959	0.00400956	0.00799792	0.162037	0.00738698	0.181078	0.213225	0.18938	0.00629796	0.189302	0.00885959	0.00800598	0.197955	0.00246394
Otu0000188	0.104485	0.108728	0.10281	0.133506	0.0922813	0.107289	0.0981323	0.0915661	0.128656	0.114425	0.109115	0.123273	0.11336	0.0741506	0.109604	0.0786524	0.102208	0.118557	0.115523	0.00629089	0.11196	0.113149	0.106107	0.118634	0.101704	0.114464	0.121088	0.137112	0.0885671	0.0936563	0.132022	0.174505	0.103039	0.0953245	0.00513473	0.127615	0.0882103	0.0969748	0.113426	0.153895	0.113904	0.118067	0.105758	0.142754	0.0936443	0.00531576	0.0800598	0.0782958	0.028746
Otu0000189	0.116269	0.0950142	0.113409	0.13983	0.0906334	0.102012	0.0949668	0.127996	0.120015	0.134618	0.095185	0.131602	0.101664	0.0844055	0.0830335	0.0856216	0.102208	0.0852781	0.092418	0.0880725	0.117673	0.109144	0.0836371	0.0886759	0.0975698	0.104859	0.10563	0.129252	0.0868474	0.112388	0.11158	0.136385	0.102111	0.0980743	0.12118	0.122018	0.111466	0.118969	0.111111	0.0812568	0.12656	0.107494	0.0873115	0.0776748	0.109755	0.0912538	0.105857	0.0782958	0.0295673
Otu0000190	0.170476	0.167499	0.00423958	0.00281065	0.00329576	0.177642	0	0.175255	0.153619	0.141349	0.178182	0.000832924	0.00449843	0.00315535	0.132854	0.0019912	0.00608384	0.00415991	0.00739344	0	0.00571226	0.00500661	0.203475	0.00958658	0.134779	0.156888	0.163169	0.136239	0.00515925	0.00499501	0.154167	0.168575	0.158736	0.156736	0.00718863	0.00447773	0.176421	0.186951	0.00462963	0.146508	0.000973539	0.000881096	0.00245948	0.172144	0.00100693	0.173648	0.206376	0.0073864	0.0895233
Otu0000191	0.0463505	0.0372221	0.0243776	0.0526996	0.041197	0.0316589	0.0411523	0.0275683	0.0499261	0.0347764	0.0609416	0.0358157	0.0521817	0.0394418	0.0453916	0.0338504	0.0474539	0.0395191	0.0554508	0.0377453	0.047983	0.0510674	0.0374494	0.0227681	0.0429969	0.0384215	0.0309161	0.0375529	0.0421339	0.0505744	0.0502534	0.0415085	0.0566251	0.0577447	0.0410779	0.0503745	0.0657568	0.0429888	0.0451389	0.0418595	0.0389416	0.0405304	0.0467301	0.043036	0.041284	0.0380963	0.0542627	0.0502275	0.0747396
Otu0000192	0.080917	0.0528945	0.0582942	0.0801034	0.0601476	0.0703532	0.0654215	0.072859	0.0691284	0.0504818	0.0580397	0.0707985	0.0782726	0.0638957	0.0763908	0.0657096	0.0498874	0.046799	0.0572992	0.0613362	0.06055	0.0460608	0.0624157	0.0527262	0.0735908	0.0584327	0.0738552	0.0602594	0.0722295	0.0643107	0.068992	0.067769	0.0677645	0.0669105	0.0677785	0.0817186	0.0553319	0.07698	0.0613426	0.0689451	0.0623065	0.0687255	0.0787034	0.0724265	0.0775334	0.0611312	0.0604896	0.0782958	0.0320313
Otu0000193	0.0817026	0.104809	0.178062	0.167936	0.0749786	0.152139	0.119236	0.171317	0.0585671	0.124522	0.110856	0.170749	0.0908682	0.12858	0.173817	0.266821	0.0608384	0.112317	0.184836	0.308254	0.0948235	0.118156	0.190992	0.292391	0.0686296	0.137677	0.138264	0.103926	0.0567517	0.106144	0.126059	0.157563	0.0612665	0.114573	0.14788	0.101868	0.0625491	0.139964	0.128472	0.185906	0.0817773	0.141856	0.131582	0.146952	0.0765265	0.128464	0.117421	0.130001	0.0106771
Otu0000194	0.0455649	0.0577921	0.0922108	0.0674555	0.0535561	0.0809061	0.073863	0.0462753	0.0729689	0.0785273	0.0719692	0.0824595	0.0692758	0.0670511	0.078605	0.122459	0.0438036	0.0655185	0.0785553	0.128963	0.0639773	0.0610806	0.0973686	0.150989	0.054573	0.0544305	0.0721377	0.0716126	0.0524524	0.0568182	0.0783612	0.0770873	0.0510555	0.0916582	0.0616168	0.0537327	0.0521243	0.07698	0.0810185	0.0800256	0.050624	0.0775365	0.0885413	0.0745258	0.0614226	0.0575874	0.0800598	0.0768185	0.0459936
Otu0000195	0.0510641	0.0489764	0.0975103	0.093454	0.0667392	0.0474884	0.0675319	0.0767974	0.0768093	0.0875018	0.092283	0.0882899	0.0683761	0.0473302	0.0797122	0.07467	0.0547545	0.0571987	0.109977	0.0817816	0.0639773	0.0791044	0.0786438	0.0802876	0.0537461	0.0416233	0.0386452	0.064626	0.034395	0.0536963	0.0672884	0.0669219	0.0733342	0.0549949	0.0934522	0.110824	0.0553319	0.0659828	0.0983796	0.0997242	0.0554917	0.0405304	0.056568	0.0934197	0.0624295	0.0522716	0.0871762	0.0960232	0.0476363
Otu0000196	0.0832738	0.087178	0.0731327	0.0906434	0.0766265	0.0765091	0.0812493	0.0748282	0.0835302	0.0785273	0.0829967	0.104948	0.082771	0.0922939	0.0941046	0.106529	0.0632719	0.0925579	0.0748586	0.0927906	0.0765443	0.119157	0.0711539	0.0623128	0.0595341	0.0816457	0.0936072	0.0733592	0.06879	0.0905345	0.105617	0.0906411	0.0881867	0.0760763	0.0821558	0.104107	0.0697663	0.0799792	0.0914352	0.0714075	0.0691213	0.0775365	0.089771	0.0944693	0.0745126	0.0823942	0.0809493	0.0723867	0.0632412
Otu0000197	0.0581345	0.0969733	0.177002	0.158802	0.0700349	0.0914591	0.103408	0.169348	0.0499261	0.115547	0.106213	0.155757	0.0638776	0.0765171	0.110711	0.210071	0.0547545	0.0998378	0.138627	0.303535	0.0594075	0.0740978	0.123583	0.2145	0.0661491	0.0968542	0.110783	0.0978123	0.0541721	0.0767982	0.0877305	0.118596	0.0603383	0.0669105	0.115018	0.0996295	0.0585396	0.0929758	0.106481	0.153895	0.0525711	0.106613	0.103298	0.0713768	0.0755196	0.104543	0.075612	0.113751	0.0106771
Otu0000198	0.0526353	0.0636693	0.0657135	0.0646449	0.0486125	0.0633179	0.0495938	0.0610441	0.0393648	0.0717964	0.0539769	0.0699656	0.0575798	0.0631069	0.0597841	0.089604	0.0401533	0.0675985	0.066541	0.100654	0.0422707	0.0620819	0.0599191	0.077891	0.0537461	0.0568318	0.0652674	0.0751059	0.034395	0.0636863	0.0502534	0.0796286	0.0445575	0.0559115	0.0749671	0.0638076	0.0384918	0.072981	0.0706019	0.0960307	0.0438093	0.0704877	0.0700952	0.100767	0.042291	0.0797363	0.0533732	0.0856822	0.00739183
Otu0000199	0.0581345	0.0597512	0.0455755	0.0737795	0.0774504	0.0958562	0.0580352	0.0915661	0.0691284	0.0852582	0.0905419	0.0699656	0.0521817	0.0899273	0.058677	0.0577448	0.0596216	0.0821582	0.0961147	0.0581907	0.0776868	0.0750991	0.0836371	0.0886759	0.0694565	0.0888498	0.100477	0.0751059	0.0558919	0.0711788	0.079213	0.0728517	0.0779756	0.0696602	0.0790749	0.0671659	0.0625491	0.072981	0.0717593	0.0726386	0.0642536	0.0907529	0.0873115	0.0724265	0.0724988	0.0744206	0.0800598	0.0842049	0.0517428
Otu0000200	0.00628481	0.018611	0.0158984	0.0182692	0.0041197	0.00967356	0.016883	0.030522	0.0124815	0.0145836	0.0150903	0.0291523	0.0116959	0.00552185	0.00885691	0.0109516	0.00486707	0.0114397	0.00554508	0.00943634	0.0171368	0.00700925	0.019973	0.0155782	0.00578804	0.00720403	0.0137405	0.0235798	0.00515925	0.00936563	0.0238491	0.0220249	0.0102111	0.00733266	0.018485	0.0167915	0.0200478	0.00799792	0.00810185	0.014774	0.00681477	0.00264329	0.0135271	0.0052483	0.0100693	0.0115175	0.00978508	0.0206819	0.119912
Otu0000201	0.0636337	0.101871	0.108109	0.0660502	0.0494364	0.108168	0.0928564	0.0886123	0.0537665	0.106573	0.0748712	0.0999509	0.0476833	0.0836167	0.101854	0.0706876	0.0608384	0.0946379	0.076707	0.0864997	0.0571226	0.107141	0.0923753	0.0754943	0.0620147	0.132074	0.103054	0.0978123	0.0567517	0.078047	0.0638814	0.102501	0.065908	0.10449	0.077021	0.0727631	0.045709	0.119969	0.114583	0.139121	0.0564653	0.155073	0.109447	0.12281	0.0594087	0.0974555	0.109415	0.090114	0.0344952
Otu0000202	0.0015712	0.0587717	0.0678333	0.00421597	0.00164788	0.000879415	0.00105519	0.144733	0.00384047	0.00112182	0.000580397	0.00166585	0	0.00394418	0.00110711	0	0.00243353	0	0.00184836	0.00157272	0.0685471	0.00100132	0.087382	0	0.00248059	0	0.000858782	0.00174665	0.0034395	0.00187313	0.0017035	0.112666	0.00371312	0	0.00205389	0.00223886	0.00240573	0.0609841	0.00115741	0	0.11001	0.0599145	0.0848521	0.00209932	0.0936443	0.00265788	0.00177911	0.00295456	0.138802
Otu0000203	0.0510641	0.0313449	0.020138	0.043565	0.0560279	0.0501266	0.045373	0.0482445	0.0662481	0.0572127	0.0725496	0.0383145	0.048583	0.0560074	0.0553557	0.0258856	0.0304192	0.0623986	0.0517541	0.045609	0.0582651	0.0550727	0.0636641	0.0275614	0.0529192	0.046426	0.0326337	0.0462862	0.0670702	0.0368382	0.0519569	0.0626864	0.0751908	0.0467457	0.0441587	0.0313441	0.0769835	0.0659828	0.025463	0.0504777	0.0710684	0.0493414	0.0381219	0.0440857	0.042291	0.0496137	0.0667165	0.0723867	0.0722757
Otu0000204	0.109199	0.0969733	0.0890312	0.0569156	0.107112	0.0835444	0.0654215	0.0777819	0.128656	0.09872	0.0992478	0.0824595	0.125056	0.116748	0.0752837	0.0826348	0.11681	0.117517	0.0794795	0.084927	0.109675	0.116153	0.0549258	0.074296	0.137259	0.115265	0.0901721	0.0934457	0.125542	0.0892857	0.0970998	0.0940295	0.147597	0.111823	0.0811288	0.0929129	0.131514	0.118969	0.0914352	0.116961	0.136295	0.134808	0.089771	0.098668	0.122845	0.119605	0.112084	0.090114	0.057492
Otu0000205	0.0455649	0.0607307	0.0445156	0.0534023	0.0379013	0.0299001	0.0464282	0.0383987	0.0518463	0.0448727	0.0528161	0.0491425	0.0476833	0.0378641	0.0464988	0.064714	0.0474539	0.0561587	0.0609959	0.0377453	0.0491255	0.0520687	0.047436	0.0467346	0.0388626	0.0384215	0.0489506	0.0497795	0.0498727	0.0636863	0.0587709	0.0516739	0.0389878	0.0595778	0.0739402	0.0514939	0.063351	0.0329914	0.0439815	0.0320102	0.0525711	0.0326006	0.0504193	0.0283408	0.0523602	0.0451839	0.0658269	0.0457957	0.0977365
Otu0000206	0.0707041	0.0959937	0.0752525	0.0681582	0.0634434	0.0765091	0.062256	0.0748282	0.0787296	0.08638	0.0957654	0.0608034	0.0737742	0.0623181	0.0542485	0.0716832	0.0474539	0.0956779	0.0739344	0.0440362	0.0674047	0.0771018	0.0886303	0.0754943	0.0628416	0.0656368	0.0841606	0.0838391	0.0567517	0.0774226	0.0817682	0.0728517	0.0677645	0.0907416	0.108856	0.0727631	0.0705682	0.0749805	0.0925926	0.0898749	0.0662007	0.0572712	0.056568	0.0661285	0.069478	0.0726487	0.0800598	0.0871595	0.0821315
Otu0000207	0.096629	0.164561	0.172763	0.15037	0.124415	0.113444	0.161443	0	0.104653	0.102085	0.140456	0.133268	0.120558	0.0828278	0.140603	0.0766612	0.135061	0.123757	0.138627	0.110091	0.146234	0.129171	0.0948719	0.0587178	0.122376	0.120067	0.109924	0.176412	0.147039	0.0999001	0.0988033	0.0957238	0.0751908	0.100824	0.0842097	0.00671659	0.0946256	0.15196	0.105324	0.102187	0.00389416	0.0801797	0.00245948	0.0671782	0.0996858	0.000885959	0.0862867	0.0650003	0.0205329
Otu0000208	0.000785601	0	0.0423958	0.0597262	0	0.0422119	0.0443178	0.000984581	0.00288035	0.00112182	0.0580397	0.0474767	0.0332883	0	0.0431774	0.0408196	0.0219018	0.0405591	0	0	0	0.0360476	0.00124832	0	0.000826863	0	0.0532445	0.0462862	0.000859875	0.00124875	0.0485499	0.044897	0	0.0476623	0	0.0593299	0	0	0	0.00369349	0.0301797	0	0.0393517	0	0	0.00177192	0.0364717	0	0.155228
Otu0000209	0.116269	0.0783622	0.0890312	0.103291	0.096401	0.0677149	0.0854701	0.15261	0.0806498	0.0852582	0.095185	0.124939	0.108862	0.0954492	0.0963188	0.168256	0.102208	0.0956779	0.117371	0.1211	0.0913962	0.0690912	0.108603	0.146195	0.0752445	0.0888498	0.0858782	0.0899524	0.107484	0.0861638	0.0766577	0.101654	0.116035	0.0797426	0.108856	0	0.110664	0.0759802	0.087963	0.107111	0.106116	0.0872285	0.102068	0.108115	0.0916304	0.0956836	0.101409	0.13591	0.00410657
Otu0000210	0.0895586	0.0783622	0.0794921	0.0590236	0.0840419	0.0800267	0.0675319	0.0462753	0.0720088	0.100964	0.0516553	0.0624693	0.111561	0.0859832	0.0941046	0.106529	0.0559713	0.0551188	0.0656168	0.0975088	0.0845415	0.0821084	0.0561742	0.0826842	0.0752445	0.0760426	0.0661262	0.0558928	0.0662104	0.0618132	0.0706955	0.0686162	0.0677645	0.078826	0.0646977	0.0514939	0.0761816	0.0749805	0.099537	0.121885	0.100275	0.0995639	0.106987	0.116512	0.0865958	0.0850521	0.0942926	0.0960232	0.0147837
Otu0000211	0.0487073	0.068567	0.080552	0.106102	0.0403731	0.0703532	0.0759734	0.102396	0.0432053	0.0673091	0.0725496	0.098285	0.0521817	0.0662623	0.0774979	0.0935863	0.0498874	0.0727984	0.100736	0.108518	0.0377009	0.0700925	0.0948719	0.134212	0.0446506	0.0640359	0.086737	0.0550194	0.0404141	0.0711788	0.075806	0.0694633	0.0371312	0.0568281	0.0739402	0.0548522	0.0601434	0.0679823	0.0706019	0.114498	0.06328	0.0599145	0.0774736	0.0797741	0.0493395	0.0567014	0.0773911	0.073864	0.0172476
Otu0000212	0.080917	0.0979528	0.0953905	0.108913	0.0898095	0.0422119	0.0896908	0.0915661	0.0796897	0.0919891	0.112597	0.112445	0.082771	0.0828278	0.0885691	0.0915951	0.073006	0.105038	0.0813279	0.0959361	0.108533	0.0771018	0.0961202	0.0946675	0.078552	0.0776435	0.0996187	0.110039	0.0808282	0.128621	0.105617	0.0914882	0.0863301	0.109073	0.100641	0.109704	0.081795	0.0649831	0.0949074	0.0738698	0.0963804	0.0537469	0.0959197	0.0776748	0.0886096	0.0788504	0.104078	0.11966	0.0353165
Otu0000213	0.0447793	0.0382016	0.0339166	0.0344304	0.00164788	0.0307795	0.0295452	0.000984581	0.0240029	0.0358982	0.0400474	0.0258206	0.0521817	0.00157767	0.0287849	0.0278768	0.0352862	0.0384791	0.0443607	0.0345999	0.0377009	0.0320423	0.00124832	0.0227681	0.0264596	0.0344193	0.0283398	0.0401729	0.0318154	0.0443307	0.0281078	0.0313432	0.0315616	0.0412462	0.0328623	0.0145526	0.0240574	0.0389899	0.0300926	0.0283168	0.0311533	0.027314	0.0221353	0.0262415	0.0332286	0.022149	0.0284657	0.026591	0.151122
Otu0000214	0.0463505	0.0744441	0.0763124	0.103291	0.0370773	0.0668355	0.0664767	0.0994427	0.0374446	0.0818927	0.0446905	0.0791278	0.0647773	0.0709953	0.0819264	0.107525	0.0279856	0.0655185	0.0702377	0.127391	0.0434132	0.0680899	0.087382	0.105452	0.0504387	0.0712399	0.0558208	0.0611327	0.0395542	0.0405844	0.0485499	0.0559095	0.0556969	0.0485788	0.0472396	0.0649271	0.0336803	0.0749805	0.0578704	0.0787944	0.0340739	0.0810608	0.0577978	0.0619299	0.0453117	0.0664469	0.0471463	0.0576139	0.03121
Otu0000215	0.100557	0.106769	0.0953905	0.0758875	0.0996968	0.110806	0.0728079	0.0955044	0.110413	0.114425	0.0847379	0.0957862	0.110661	0.0702064	0.0874619	0.0806436	0.114376	0.106078	0.0859488	0.0833543	0.11196	0.0861137	0.0836371	0.0838826	0.103358	0.122469	0.0841606	0.104799	0.0954461	0.078047	0.0911375	0.119443	0.0789039	0.113656	0.0831827	0.113063	0.101843	0.127967	0.12037	0.132966	0.114878	0.13657	0.137731	0.103916	0.0855889	0.12049	0.091624	0.107841	0.0197116
Otu0000216	0.0722753	0.0793418	0.0784322	0.0850221	0.0906334	0.0844238	0.108684	0.0856586	0.0883307	0.0673091	0.098087	0.0774619	0.0548808	0.0844055	0.0941046	0.100556	0.109509	0.0956779	0.142324	0.102227	0.0799717	0.0720952	0.114845	0.0994608	0.10005	0.0680381	0.074714	0.0716126	0.0980257	0.114885	0.099655	0.0872526	0.0649797	0.0861587	0.0688055	0.11754	0.0761816	0.0759802	0.0729167	0.0689451	0.0856714	0.0678444	0.089771	0.0850224	0.0755196	0.0761925	0.0747225	0.0960232	0.0386018
Otu0000217	0.0573489	0.070526	0.0635937	0.0632396	0.0601476	0.0677149	0.0580352	0.0502137	0.0518463	0.0830146	0.0539769	0.0591376	0.0638776	0.0583739	0.0398561	0.054758	0.0401533	0.0623986	0.0378914	0.0330272	0.0536953	0.0510674	0.0274629	0.0383463	0.0520924	0.0680381	0.0704201	0.0724859	0.061911	0.0530719	0.0519569	0.0728517	0.046414	0.0568281	0.0616168	0.0436579	0.0473128	0.0589847	0.0590278	0.0726386	0.050624	0.0493414	0.0528788	0.0650789	0.0432979	0.0691048	0.0480359	0.0650003	0.0747396
Otu0000218	0.0817026	0.0744441	0.0890312	0.0555103	0.0535561	0.0492472	0.0569801	0.065967	0.0758492	0.0650655	0.0574593	0.0399803	0.0710751	0.0575851	0.0509272	0.079648	0.0644887	0.0800782	0.0674652	0.0597635	0.0616924	0.0670886	0.067409	0.0671061	0.08434	0.0912511	0.0626911	0.0558928	0.0773887	0.0886613	0.0630297	0.0643806	0.0789039	0.0815758	0.0503204	0.0694048	0.0745778	0.07698	0.0914352	0.0738698	0.0954068	0.0766554	0.0700952	0.0902707	0.0735057	0.0753065	0.0773911	0.0768185	0.121555
Otu0000219	0.0353521	0.0430992	0.0339166	0.0302145	0.0486125	0.0448501	0.0358763	0.0482445	0.0470457	0.0415073	0.0464317	0.0374816	0.0332883	0.0347088	0.0420703	0.0408196	0.0267689	0.0374392	0.0489816	0.0518998	0.0456981	0.0490648	0.0374494	0.0455362	0.0463043	0.0400224	0.0498094	0.0410462	0.0361147	0.0462038	0.0596227	0.0457441	0.0612665	0.0421628	0.0441587	0.0369413	0.0505204	0.0389899	0.0497685	0.0381661	0.0749625	0.0581523	0.0541086	0.046185	0.0453117	0.0460699	0.0515941	0.0398865	0.0763823
Otu0000220	0.0581345	0.0920756	0.0869114	0.103994	0.0634434	0.0624384	0.0875805	0.0856586	0.105613	0.0482382	0.092283	0.0707985	0.0575798	0.0599516	0.0752837	0.0876128	0.150879	0.090478	0.132158	0.0723452	0.117673	0.0700925	0.067409	0.0766926	0.0859938	0.0576323	0.0961836	0.0908257	0.108344	0.0949051	0.075806	0.0855584	0.0649797	0.0669105	0.0708593	0.082838	0.0761816	0.0759802	0.0833333	0.0430907	0.0730154	0.0634389	0.089771	0.0724265	0.0755196	0.0708767	0.0818389	0.0650003	0.0361378
Otu0000221	0.0023568	0.0910961	0.0763124	0.106805	0.0865137	0.103771	0.090746	0.101412	0.105613	0.108816	0.105052	0.103283	0	0.12858	0.116247	0	0.0839569	0.118557	0.131234	0.0975088	0.0913962	0.0961269	0.124831	0.121031	0.0893012	0.104859	0.117653	0.0890791	0.0730894	0.098027	0.08262	0.109278	0.100254	0.0861587	0.0883175	0.0962712	0.0761816	0.118969	0.0891204	0.104649	0.0749625	0.11278	0.0762439	0.089221	0.0876027	0.0894819	0.104967	0.0768185	0.0714544
Otu0000222	0.0542065	0.0470173	0.0508749	0.0632396	0.0543801	0.0501266	0.0464282	0.0610441	0.0547267	0.0504818	0.07313	0.05414	0.0386865	0.0662623	0.108497	0.123454	0.0352862	0.0634386	0.0748586	0.0723452	0.0491255	0.0480634	0.0836371	0.111444	0.0537461	0.0384215	0.0626911	0.0392996	0.0576116	0.0511988	0.0485499	0.0686162	0.082617	0.0522452	0.0503204	0.0526133	0.0777854	0.045988	0.0752315	0.0430907	0.0535447	0.0581523	0.0602573	0.0619299	0.055381	0.0567014	0.091624	0.0827276	0.0320313
Otu0000223	0.0487073	0.068567	0.0614739	0.0449703	0.0650913	0.0685943	0.0527593	0.065967	0.08257	0.0459945	0.0667456	0.0799607	0.0557805	0.0749395	0.0553557	0.0637184	0.0644887	0.0686385	0.0600717	0.0660544	0.06055	0.0720952	0.0724023	0.0659077	0.0570536	0.0576323	0.0532445	0.0716126	0.0507326	0.0643107	0.0613262	0.0618393	0.065908	0.0476623	0.057509	0.0805991	0.0665587	0.053986	0.0486111	0.0701763	0.061333	0.0652011	0.0676357	0.0598306	0.0624295	0.0451839	0.0658269	0.0605685	0.0689904
Otu0000224	0.0557777	0.0626898	0.0445156	0.0730768	0.0617955	0.0474884	0.0569801	0.0561211	0.0720088	0.0437509	0.0603612	0.0491425	0.0530814	0.0489079	0.0553557	0.0388284	0.0389365	0.0311993	0.0304979	0.0251636	0.0319887	0.0510674	0.0274629	0.0275614	0.0661491	0.046426	0.0687026	0.0410462	0.0610511	0.0674326	0.0655849	0.0609921	0.0649797	0.0549949	0.0492935	0.0447773	0.0713701	0.0519865	0.0497685	0.0430907	0.0564653	0.0422926	0.0528788	0.0535326	0.0533672	0.0540435	0.0400299	0.0457957	0.0895233
Otu0000225	0.0911298	0.070526	0.10069	0.0744821	0.106288	0.0562825	0.0759734	0.0571057	0.121935	0.0841364	0.0876399	0.0907887	0.105263	0.0678399	0.0863548	0.0716832	0.0912575	0.090478	0.110902	0.0644816	0.110818	0.10614	0.0773955	0.0551228	0.11328	0.0816457	0.0901721	0.0681193	0.0988856	0.104895	0.0911375	0.0686162	0.0993261	0.109073	0.0862636	0.0514939	0.0793893	0.0759802	0.0891204	0.0652516	0.0934598	0.0757743	0.0910008	0.0724265	0.102707	0.0956836	0.0996299	0.0753413	0.0763823
Otu0000226	0.0188544	0.0235087	0.0286172	0.0217825	0.0296619	0.0272619	0.0189934	0.0108304	0.0336041	0.0201927	0.0272786	0.0158256	0.0233918	0.0307646	0.0276778	0.0179208	0.020685	0.0228795	0.0240287	0.0110091	0.022849	0.025033	0.0162281	0.0119832	0.0223253	0.0184103	0.0283398	0.0200865	0.020637	0.0262238	0.0272561	0.0194836	0.0259919	0.0155819	0.0236198	0.0246275	0.0168401	0.0109971	0.0266204	0.00615582	0.0194708	0.0149786	0.0221353	0.00944693	0.0231593	0.0177192	0.0151224	0.010341	0.177404
Otu0000227	0.0290673	0.0460378	0.0519348	0.0379437	0.0230703	0.0448501	0.0211037	0.0452907	0.0201625	0.0415073	0.030761	0.0583047	0.0368871	0.0410195	0.0276778	0.0507756	0.015818	0.0374392	0.0175594	0.0440362	0.022849	0.0360476	0.0324562	0.0347513	0.0248059	0.0448251	0.0386452	0.0462862	0.0171975	0.0274725	0.0332183	0.0550623	0.0111394	0.0329969	0.037997	0.0447773	0.0224535	0.0389899	0.0358796	0.0504777	0.025312	0.0440548	0.0455004	0.0482843	0.0201386	0.0380963	0.0284657	0.0517048	0.057492
Otu0000228	0.00628481	0.0225291	0.029677	0.0217825	0.0115352	0.0131912	0.0211037	0.00984582	0.0192023	0.0179491	0.0203139	0.0174914	0.014395	0.0173544	0.0143925	0.014934	0.0292024	0.0228795	0.0175594	0.0125818	0.0114245	0.0120159	0.0187247	0.0119832	0.0107492	0.0168094	0.0206108	0.0209598	0.00773887	0.014985	0.0204421	0.0220249	0.0102111	0.0164985	0.0205389	0.0190303	0.0144344	0.0109971	0.0138889	0.0110805	0.0175237	0.0158597	0.0209056	0.0199435	0.0171178	0.00885959	0.0169015	0.0192046	0.148658
Otu0000229	0.0769889	0.0695465	0.0858515	0.0786981	0.0568519	0.0685943	0.073863	0.0827048	0.0643278	0.0729182	0.0725496	0.0749631	0.0530814	0.0583739	0.0608912	0.0786524	0.068139	0.0863181	0.0776311	0.0471817	0.0799717	0.0640846	0.106107	0.0587178	0.0752445	0.0520291	0.0738552	0.0759792	0.0885671	0.0668082	0.0621779	0.0982651	0.0751908	0.0760763	0.0821558	0.0761214	0.0601434	0.0649831	0.0648148	0.0886438	0.0710684	0.0784176	0.0725547	0.0902707	0.055381	0.086824	0.0925135	0.0945459	0.03121
Otu0000230	0.0738465	0.0734646	0.0996301	0.0850221	0.134302	0.0817856	0.105519	0.106335	0.159379	0.0886236	0.13117	0.0916216	0.0989654	0.0978157	0.0863548	0.123454	0.15818	0.129997	0.127537	0.116381	0.137094	0.0831097	0.121087	0.109047	0.140567	0.0816457	0.109924	0.0978123	0.1393	0.104271	0.125208	0.0923353	0.129031	0.0879919	0.0842097	0.100749	0.133919	0.101973	0.111111	0.0701763	0.129481	0.0572712	0.131582	0.0703272	0.0986789	0.0885959	0.144997	0.0871595	0.0410657
Otu0000231	0.0392801	0.0382016	0.0551145	0.091346	0.0304858	0.0342972	0.0664767	0.0767974	0.032644	0.04936	0.0568789	0.076629	0.0296896	0.0615292	0.0531414	0.0457976	0.0425868	0.0384791	0.0554508	0.0691998	0.0297038	0.0530701	0.0574225	0.0683044	0.036382	0.0504282	0.0489506	0.0794725	0.034395	0.0499501	0.0519569	0.110972	0.0343464	0.0559115	0.0564821	0.0861963	0.0280669	0.0619839	0.056713	0.0738698	0.0389416	0.0563901	0.0553383	0.0703272	0.0322217	0.0575874	0.0533732	0.0694321	0.0418871
Otu0000232	0.00314241	0.0205701	0.0148385	0.0147559	0	0.0219854	0.0147726	0.0108304	0.00192023	0.0145836	0.0121883	0.0233219	0	0.0370753	0.0221423	0.0318592	0.00121677	0.0280794	0.020332	0.0204454	0	0.0270357	0.0137315	0.0239664	0	0.0184103	0.0180344	0.034933	0	0.0174825	0.0204421	0.0347316	0.00278484	0.0238311	0.0410779	0.0257469	0	0.0219943	0.0162037	0.0406284	0	0.0308384	0.0295138	0.049334	0	0.0124034	0.0231284	0.0384093	0.00328526
Otu0000233	0.0856306	0.100891	0.119768	0.160207	0.0642674	0.0905797	0.118181	0.130949	0.0998521	0.0886236	0.106213	0.154091	0.0701754	0.103338	0.102962	0.138388	0.0620551	0.117517	0.121068	0.0896452	0.06055	0.103136	0.12608	0.160575	0.0777251	0.092852	0.121088	0.103052	0.0627709	0.088037	0.115838	0.124526	0.076119	0.105407	0.119126	0.136571	0.0665587	0.0819787	0.108796	0.109574	0.0671742	0.082823	0.110677	0.138555	0.0765265	0.0779644	0.136991	0.140342	0.0114984
Otu0000234	0	0	0	0	0	0	0	0	0	0	0	0	0.000899685	0	0	0	0	0	0	0	0.0022849	0	0	0	0	0	0	0	0	0	0	0	0	0	0	0	0	0	0	0	0	0	0	0	0	0	0	0	0
Otu0000235	0.0754177	0.0783622	0.10069	0.0730768	0.0749786	0.0940974	0.0664767	0.0836894	0.0748891	0.08638	0.0597808	0.0816265	0.0845704	0.0757283	0.0730695	0.0816392	0.068139	0.0738383	0.0646926	0.108518	0.0891113	0.0791044	0.0699056	0.0910725	0.060361	0.0816457	0.0772904	0.0960657	0.0515925	0.0711788	0.0545122	0.101654	0.0835453	0.0714934	0.0688055	0.0772408	0.0713701	0.101973	0.0868056	0.130503	0.0846979	0.106613	0.0885413	0.0745258	0.0886096	0.0841661	0.0693851	0.0827276	0.0180689
Otu0000236	0	0.0470173	0.0466354	0.0407544	0.0387252	0.0430913	0.0348211	0.0344604	0.0259232	0.0325327	0.0359846	0.0341499	0.0161943	0.0347088	0.0442845	0.0228988	0.0973414	0.0384791	0.0406639	0.0314545	0.0217066	0.0300397	0	0.0251648	0.0248059	0.000800448	0	0.032313	0.0292357	0.0287213	0.0451429	0.0177894	0.0287767	0.028414	0.0174581	0.0369413	0.0328784	0.0359906	0.0347222	0.0233921	0.036021	0.0475792	0.0418112	0.0262415	0.028194	0.0292367	0.0293553	0.0192046	0.0928086
Otu0000237	0.0526353	0.0528945	0.0561744	0.0442677	0.0601476	0.0580414	0.0485386	0.0521828	0.057607	0.0650655	0.0499141	0.043312	0.0548808	0.0567962	0.0476059	0.0557536	0.0608384	0.0270394	0.0480574	0.0503271	0.0628349	0.0440582	0.0461876	0.0431396	0.0661491	0.0440247	0.0661262	0.0585127	0.0636307	0.0561938	0.0655849	0.0567566	0.0621948	0.0375799	0.0472396	0.0481356	0.0585396	0.0609841	0.0486111	0.0911061	0.06328	0.0493414	0.056568	0.0724265	0.0795473	0.0478418	0.0533732	0.0723867	0.0238181
Otu0000238	0.0581345	0.0617103	0.105989	0.0758875	0.0782743	0.0474884	0.0559249	0.0856586	0.0499261	0.0583345	0.0783535	0.0624693	0.0548808	0.0615292	0.0619983	0.0945819	0.0401533	0.0655185	0.0582234	0.0927906	0.0502679	0.0550727	0.0586708	0.0922708	0.0553998	0.0648363	0.0618323	0.0716126	0.055032	0.0699301	0.0681402	0.0838642	0.0668362	0.0687436	0.078048	0.0705242	0.0601434	0.0679823	0.0798611	0.0701763	0.0652271	0.0484603	0.0602573	0.0640292	0.0724988	0.0637891	0.067606	0.0590912	0.0106771
Otu0000239	0.154763	0.0881575	0.0996301	0.0962646	0.107936	0.0800267	0.145616	0.0925507	0.193944	0.100964	0.123044	0.0641351	0.125956	0.117537	0.0741766	0.114494	0.2032	0.160156	0.165428	0.0707725	0.13024	0.119157	0.119838	0.122229	0.144701	0.0672377	0.127959	0.0812192	0.130701	0.162338	0.10221	0.0745459	0.150382	0.129238	0.145826	0.0850768	0.135523	0.0839782	0.112269	0.0480154	0.131428	0.0757743	0.125433	0.120711	0.150032	0.132894	0.144997	0.18466	0.0180689
Otu0000240	0.0762033	0.000979528	0	0.106805	0.082394	0.0448501	0.0654215	0	0.110413	0.0628218	0.100409	0.140764	0.0539811	0.110437	0.068641	0.054758	0.0596216	0.0842381	0.0739344	0.0644816	0.00114245	0.0791044	0.00124832	0.077891	0.0901281	0.0448251	0.0541033	0.0716126	0.0670702	0.0711788	0.0621779	0.00338845	0.089115	0.0696602	0.096533	0.146646	0.0850026	0.00399896	0.0659722	0.0541712	0.00389416	0.00264329	0.00122974	0.0661285	0.00100693	0.0496137	0.0765016	0.110796	0.00410657
Otu0000241	0.0565633	0.138113	0.134607	0.0864274	0.106288	0.128395	0.11607	0.0620286	0.08257	0.0931109	0.10273	0.098285	0.0818713	0.107282	0.11514	0.0527668	0.181298	0.0831981	0.119219	0.116381	0.12567	0.101133	0.0861337	0.074296	0.0901281	0.0872489	0.0790079	0.0960657	0.116943	0.101149	0.114135	0.0618393	0.0519837	0.078826	0.0595629	0.0895546	0.0866065	0.118969	0.114583	0.0615582	0.0623065	0.0801797	0.0934602	0.0451354	0.0855889	0.0832802	0.0684956	0.0517048	0.028746
Otu0000242	0.0620625	0.0470173	0.0413359	0.0555103	0.0667392	0.0439707	0.0770286	0.054152	0.0796897	0.0504818	0.0684868	0.0574717	0.0512821	0.0536409	0.0453916	0.0567492	0.0462371	0.0811182	0.0600717	0.0440362	0.073117	0.0510674	0.0761472	0.0671061	0.0529192	0.0440247	0.0566796	0.0593861	0.0610511	0.0643107	0.0536604	0.0720046	0.0705494	0.078826	0.0492935	0.0660465	0.0681625	0.053986	0.0486111	0.0430907	0.061333	0.0449359	0.0516491	0.049334	0.0584018	0.0416401	0.0747225	0.0723867	0.0673478
Otu0000243	0.102914	0.0861985	0.0710129	0.0548076	0.0980489	0.0949768	0.0580352	0.0787665	0.109453	0.0975982	0.0899615	0.0491425	0.107063	0.0733618	0.0664268	0.0816392	0.0973414	0.107118	0.0831762	0.073918	0.0776868	0.103136	0.0811405	0.074296	0.141394	0.0864484	0.0884545	0.0637527	0.107484	0.103022	0.096248	0.08217	0.116035	0.117322	0.09756	0.0593299	0.136325	0.0869774	0.0949074	0.0935684	0.111957	0.0942773	0.105758	0.0902707	0.1017	0.0939117	0.0960717	0.0960232	0.0657052
Otu0000244	0.0667761	0.0617103	0.0635937	0.0688608	0.0568519	0.0562825	0.0633112	0.0797511	0.0691284	0.0729182	0.0621024	0.0566388	0.0683761	0.0536409	0.0597841	0.0726788	0.0608384	0.0623986	0.0646926	0.0691998	0.0514104	0.0630833	0.0486843	0.0455362	0.0504387	0.0608341	0.0635499	0.0401729	0.0748091	0.0643107	0.0621779	0.0660748	0.0779756	0.0852421	0.0759941	0.0649271	0.063351	0.0649831	0.0752315	0.0578647	0.06328	0.0607956	0.066406	0.0514333	0.0563879	0.064675	0.0693851	0.0531821	0.0517428
Otu0000245	0.0432081	0.0450583	0.049815	0.045673	0.0519082	0.0386942	0.0306004	0.0285529	0.0460856	0.0302891	0.0533965	0.0274865	0.0296896	0.0410195	0.0332134	0.0119472	0.0352862	0.044719	0.0554508	0.0220181	0.0377009	0.0450595	0.0449393	0.0167765	0.0314208	0.0336188	0.039504	0.0340596	0.0490129	0.0424575	0.0536604	0.029649	0.0436292	0.0384964	0.0451857	0.0212692	0.0489166	0.0339912	0.0347222	0.0233921	0.0369945	0.0255518	0.0381219	0.0136456	0.0342355	0.0460699	0.0453672	0.0147728	0.0952725
Otu0000246	0.0652049	0.0626898	0.0710129	0.0534023	0.0535561	0.057162	0.045373	0.0580903	0.0499261	0.0538473	0.0533965	0.0558059	0.0728745	0.0418083	0.0675339	0.07467	0.0498874	0.0530388	0.066541	0.0723452	0.0525528	0.0660872	0.0624157	0.0683044	0.0479581	0.0648363	0.0721377	0.0925724	0.0576116	0.0624376	0.0630297	0.0736988	0.0547686	0.0595778	0.0749671	0.0638076	0.0497185	0.0519865	0.056713	0.0812568	0.0535447	0.0555091	0.0713249	0.0734762	0.0634364	0.0753065	0.0667165	0.0679549	0.013141
Otu0000247	0.0691329	0.0636693	0.0667734	0.0709688	0.0848659	0.0633179	0.0823045	0.0767974	0.0998521	0.0628218	0.127107	0.0666339	0.0386865	0.0670511	0.0697481	0.0686964	0.0717893	0.0842381	0.0739344	0.0267363	0.0571226	0.0550727	0.0986169	0.0766926	0.0711102	0.0520291	0.0807255	0.0742326	0.0808282	0.0718032	0.0741025	0.0686162	0.0798322	0.0824924	0.0616168	0.0727631	0.100239	0.0579849	0.0833333	0.0467842	0.0623065	0.0475792	0.0787034	0.0545823	0.0573949	0.0682189	0.0871762	0.0989777	0.0542068
Otu0000248	0.0769889	0.0421197	0.0413359	0.0695635	0.0683871	0.0325383	0.0696423	0.0531674	0.0729689	0.0459945	0.0539769	0.0533071	0.0593792	0.0449637	0.068641	0.0657096	0.0450204	0.0603186	0.0637684	0.0534726	0.0651198	0.0831097	0.0586708	0.074296	0.0678028	0.0400224	0.0618323	0.0637527	0.0567517	0.0618132	0.0587709	0.0872526	0.0603383	0.0430793	0.0790749	0.0839574	0.0665587	0.0469878	0.0798611	0.0467842	0.0525711	0.0537469	0.061487	0.0619299	0.0684711	0.0691048	0.0765016	0.0856822	0.0788462
Otu0000249	0.0557777	0.0832599	0.080552	0.0920487	0.0650913	0.0853032	0.0685871	0.111258	0.0566469	0.0841364	0.0719692	0.0866241	0.0557805	0.0662623	0.0797122	0.122459	0.0669222	0.087358	0.0693135	0.0959361	0.06055	0.0720952	0.104858	0.112642	0.0628416	0.0680381	0.0824431	0.0724859	0.0679301	0.0505744	0.0817682	0.0872526	0.0547686	0.0779095	0.0677785	0.082838	0.0753797	0.0659828	0.056713	0.0911061	0.0827508	0.0652011	0.0799331	0.0860721	0.0825681	0.0779644	0.0773911	0.0886368	0.00410657
Otu0000250	0.0699185	0.0724851	0.0773723	0.163018	0.0535561	0.0729914	0.117126	0.147687	0.0604874	0.0774055	0.07313	0.150759	0.0881691	0.0844055	0.0841406	0.0995599	0.0620551	0.0811182	0.092418	0.105372	0.073117	0.0801057	0.11859	0.134212	0.0719371	0.0720403	0.059256	0.0768525	0.0730894	0.0718032	0.103914	0.107583	0.0668362	0.07241	0.0811288	0.0694048	0.05453	0.0669826	0.0821759	0.0972619	0.073989	0.0881096	0.0799331	0.0818734	0.0604157	0.0797363	0.0925135	0.0886368	0.0213542
Otu0000251	0.0911298	0.116564	0.146265	0.0920487	0.103816	0.0958562	0.137174	0.0787665	0.0777695	0.0964764	0.116079	0.114943	0.0908682	0.100971	0.100747	0.069692	0.164264	0.166396	0.110902	0.0691998	0.119958	0.122161	0.0848854	0.0659077	0.0876475	0.100056	0.0979011	0.130999	0.116943	0.114261	0.106469	0.122831	0.089115	0.0999074	0.0811288	0.120899	0.0914179	0.104973	0.113426	0.0984931	0.0642536	0.107494	0.111906	0.0692775	0.0926373	0.086824	0.100519	0.0782958	0.0114984
Otu0000252	0.0424225	0.0940347	0.0953905	0.0808061	0.0617955	0.0606796	0.0706975	0.0571057	0.0451255	0.0381418	0.0626828	0.0624693	0.0584795	0.0512744	0.0542485	0.0657096	0.0571881	0.0644786	0.0609959	0.114809	0.047983	0.0460608	0.0461876	0.074296	0.04217	0.0848475	0.0729965	0.0794725	0.0507326	0.0680569	0.0715472	0.0694633	0.0352747	0.0494954	0.077021	0.0805991	0.0425013	0.0479875	0.0636574	0.0627893	0.037968	0.0590334	0.0541086	0.0556319	0.0392702	0.0593593	0.0489254	0.0413638	0.000821315
Otu0000253	0.0267105	0.0587717	0.0360364	0.0386464	0.0247182	0.051006	0.0400971	0.0295374	0.0336041	0.0325327	0.0429493	0.0466437	0.0197931	0.0402307	0.0287849	0.034846	0.0304192	0.0363992	0.0443607	0.0393181	0.0536953	0.0430568	0.0374494	0.0359497	0.0339014	0.0560314	0.0489506	0.0384263	0.034395	0.0424575	0.0417359	0.044897	0.0269201	0.0430793	0.0318354	0.041419	0.0336803	0.0509867	0.0335648	0.045553	0.0311533	0.0414115	0.0344327	0.0314898	0.0342355	0.0451839	0.0355821	0.0310229	0.0821315
Otu0000254	0.0573489	0.0744441	0.0582942	0.0534023	0.0741546	0.0782679	0.0527593	0.0699053	0.0844903	0.0818927	0.0632632	0.0524742	0.0674764	0.0741506	0.0608912	0.0428108	0.0742228	0.0592787	0.0517541	0.0393181	0.0799717	0.0730965	0.0736506	0.0395446	0.0686296	0.076843	0.0661262	0.0593861	0.0773887	0.0724276	0.0741025	0.0618393	0.0881867	0.0779095	0.0636707	0.0604493	0.0777854	0.0549857	0.0509259	0.0664828	0.086645	0.073131	0.0455004	0.052483	0.0876027	0.0797363	0.0711642	0.0812504	0.109235
Otu0000255	0.0714897	0.0597512	0.0837317	0.0878327	0.0766265	0.0817856	0.0844149	0.10535	0.0892909	0.0785273	0.0992478	0.076629	0.0782726	0.111226	0.0841406	0.113498	0.0717893	0.091518	0.0794795	0.073918	0.083399	0.0791044	0.0898787	0.0970641	0.0826863	0.0744417	0.0824431	0.0803458	0.096306	0.0867882	0.0919893	0.0804757	0.0705494	0.0953245	0.0759941	0.0929129	0.0914179	0.0599844	0.0949074	0.0566335	0.0652271	0.06432	0.0799331	0.0902707	0.083575	0.0779644	0.0987404	0.0960232	0.0057492
Otu0000256	0.080917	0.0832599	0.0816119	0.0794008	0.0626195	0.100253	0.0717527	0.0807357	0.073929	0.0751618	0.0853183	0.0974521	0.0863698	0.0938715	0.0941046	0.125446	0.0571881	0.107118	0.0794795	0.1038	0.0742594	0.0710938	0.087382	0.0862792	0.0653222	0.0848475	0.0953248	0.0751059	0.0713696	0.0749251	0.0715472	0.109278	0.0724059	0.0714934	0.0842097	0.0783603	0.072974	0.0749805	0.0787037	0.0886438	0.0700948	0.073131	0.114366	0.0881714	0.0785404	0.0699908	0.0934031	0.090114	0.0221755
Otu0000257	0.0754177	0.0568126	0.0678333	0.0611316	0.0609716	0.0650767	0.0970771	0.0787665	0.0912111	0.0661873	0.103311	0.0533071	0.048583	0.0654734	0.0907833	0.0686964	0.128977	0.0727984	0.107205	0.0613362	0.0582651	0.0470621	0.0724023	0.0647094	0.0983967	0.0496278	0.0609735	0.0716126	0.0834079	0.0861638	0.0681402	0.0669219	0.0705494	0.0769929	0.058536	0.0861963	0.0641529	0.0559854	0.0543981	0.0443219	0.0554917	0.0422926	0.0725547	0.0745258	0.0483325	0.0735346	0.0791702	0.0576139	0.0459936
Otu0000258	0.0707041	0.0734646	0.0625338	0.0962646	0.0667392	0.0747502	0.0654215	0.0935352	0.0595272	0.0841364	0.0661652	0.0999509	0.0575798	0.0662623	0.0453916	0.0866172	0.0413701	0.0613586	0.0536025	0.0896452	0.0616924	0.0740978	0.091127	0.0659077	0.0752445	0.0616345	0.0781492	0.0698659	0.0464332	0.0630619	0.0911375	0.089794	0.0696211	0.0714934	0.0811288	0.111943	0.0601434	0.0759802	0.0752315	0.0787944	0.0895656	0.06432	0.0848521	0.100767	0.0563879	0.0691048	0.0765016	0.090114	0.00657052
Otu0000259	0.0369233	0.0284063	0.0180182	0.0323224	0.0263661	0.025503	0.0200485	0.0255991	0.032644	0.0190709	0.0325022	0.0224889	0.0368871	0.0362865	0.00442845	0.0258856	0.0279856	0.0322393	0.0443607	0.0204454	0.0422707	0.0240317	0.0187247	0.0383463	0.0322477	0.0256143	0.0266222	0.0192131	0.034395	0.034965	0.0442911	0.0135538	0.0343464	0.0265809	0.0256737	0.0179109	0.0416994	0.0289925	0.0300926	0.0135428	0.0389416	0.0211463	0.0295138	0.0325394	0.0352425	0.0336665	0.0275761	0.026591	0.0550281
Otu0000260	0.111555	0.107748	0.0996301	0.08713	0.117	0.116083	0.106574	0.084674	0.0748891	0.0729182	0.100409	0.0882899	0.103464	0.0883497	0.0941046	0.0627228	0.0973414	0.0946379	0.12384	0.0817816	0.102821	0.0941242	0.091127	0.0754943	0.0826863	0.0976547	0.0961836	0.0803458	0.115223	0.114261	0.120097	0.0880998	0.0789039	0.0971577	0.0985869	0.0794797	0.0946256	0.0989743	0.111111	0.0800256	0.0759361	0.0740121	0.116825	0.0860721	0.100693	0.0761925	0.109415	0.0650003	0.044351
Otu0000261	0.0864162	0.0920756	0.10069	0.10821	0.0906334	0.0844238	0.0886356	0.109289	0.0777695	0.0875018	0.0934438	0.0932875	0.104363	0.0796725	0.0730695	0.101551	0.0790899	0.0831981	0.0914938	0.0754907	0.070832	0.0981295	0.087382	0.0802876	0.0851669	0.0952533	0.0936072	0.0855858	0.0954461	0.102398	0.104766	0.110972	0.103039	0.10999	0.115018	0.0973906	0.0825969	0.0779797	0.113426	0.112036	0.0827508	0.0819419	0.089771	0.0944693	0.0855889	0.0912538	0.103188	0.0827276	0.015605
Otu0000262	0.0612769	0.105789	0.144146	0.00281065	0.0617955	0.107289	0.0833597	0.121104	0.0451255	0.00336545	0.00232159	0.115776	0.0764732	0.086772	0.109604	0.180204	0.0596216	0.102958	0.11275	0.00471817	0.0548377	0.0991309	0.113597	0.161774	0.00165373	0.114464	0.106489	0.0855858	0.0593314	0.0855395	0.0945445	0.0864055	0.0631231	0.0733266	0.11091	0.090674	0.0705682	0.099974	0	0.144046	0.0652271	0.117186	0.0848521	0.157449	0.0745126	0.108087	0.102299	0.00147728	0.000821315
Otu0000263	0.123339	0.117543	0.108109	0.0948593	0.133478	0.108168	0.105519	0.111258	0.140177	0.136862	0.13175	0.106614	0.124157	0.115959	0.121782	0.0945819	0.133844	0.121677	0.0914938	0.0707725	0.115388	0.0991309	0.117342	0.0623128	0.149662	0.101657	0.107348	0.0951923	0.146179	0.0986513	0.133725	0.104195	0.122533	0.106323	0.0893444	0.122018	0.121891	0.111971	0.0787037	0.0763321	0.139216	0.0898718	0.103298	0.0944693	0.109755	0.145297	0.106746	0.0842049	0.0262821
Otu0000264	0.0754177	0.0754236	0.0752525	0.0864274	0.103816	0.0606796	0.0854701	0.100427	0.111374	0.0751618	0.124205	0.0524742	0.0692758	0.086772	0.0675339	0.0856216	0.150879	0.128957	0.127537	0.0550453	0.0948235	0.0861137	0.102362	0.0934691	0.0793789	0.0616345	0.0712789	0.0681193	0.0937264	0.0986513	0.0911375	0.0804757	0.0640514	0.0641607	0.0872905	0.101868	0.0954275	0.0789795	0.0844907	0.0541712	0.104169	0.0581523	0.0823926	0.0766251	0.0664572	0.0815083	0.075612	0.0782958	0.0353165
Otu0000265	0.0793458	0.0636693	0.0392161	0.0316198	0.0626195	0.0562825	0.0422075	0.0374141	0.0614475	0.0605782	0.0383062	0.0366486	0.0719748	0.0473302	0.0476059	0.064714	0.0584048	0.044719	0.0517541	0.0597635	0.0616924	0.0550727	0.0299596	0.0479329	0.0752445	0.0592332	0.0541033	0.0436662	0.0653505	0.0430819	0.0468464	0.0482854	0.0798322	0.061411	0.0688055	0.0358218	0.0561338	0.0679823	0.0393519	0.0763321	0.0837244	0.0757743	0.0504193	0.052483	0.0634364	0.0620172	0.0667165	0.0561366	0.0238181
Otu0000266	0.0879874	0.113625	0.0890312	0.095562	0.101345	0.136309	0.0918012	0.0738436	0.0873706	0.0695527	0.103311	0.0849582	0.0647773	0.0993934	0.105176	0.0537624	0.115593	0.103998	0.0868729	0.102227	0.102821	0.122161	0.0998652	0.0671061	0.0760714	0.120868	0.0979011	0.104799	0.0954461	0.0849151	0.096248	0.08217	0.0566251	0.078826	0.0677785	0.104107	0.10505	0.0909763	0.105324	0.067714	0.0662007	0.115424	0.089771	0.0629796	0.0855889	0.0912538	0.0853971	0.0590912	0.0213542
Otu0000267	0.106842	0.0822803	0.0985702	0.11875	0.0856898	0.10553	0.105519	0.145718	0.111374	0.0964764	0.0882203	0.115776	0.0899685	0.108859	0.102962	0.132415	0.0863905	0.102958	0.104432	0.106945	0.0902537	0.0861137	0.122335	0.148592	0.0859938	0.0992556	0.102195	0.096939	0.0902869	0.0986513	0.104766	0.119443	0.0946847	0.0934914	0.11091	0.0861963	0.0842007	0.102973	0.0810185	0.131734	0.0915127	0.0986828	0.121744	0.12281	0.0896166	0.117833	0.0996299	0.140342	0.00903446
Otu0000268	0.0707041	0.070526	0.0657135	0.0829141	0.0609716	0.0853032	0.0664767	0.0639978	0.0614475	0.0673091	0.070228	0.0757961	0.0809717	0.0607404	0.0520343	0.0736744	0.0462371	0.0519988	0.0702377	0.119527	0.0525528	0.059078	0.0449393	0.0515279	0.0653222	0.0664372	0.0712789	0.0733592	0.0748091	0.0686813	0.0749542	0.0889469	0.052912	0.0760763	0.0657246	0.0727631	0.0697663	0.072981	0.0752315	0.100955	0.0642536	0.0819419	0.0676357	0.0692775	0.0674642	0.0522716	0.0640478	0.073864	0.00657052
Otu0000269	0.0769889	0.109707	0.0953905	0.108913	0.100521	0.10465	0.126622	0.0876277	0.00288035	0.08638	0.123624	0.0807936	0.0692758	0.0851943	0.0985331	0.059736	0.167914	0.106078	0.108129	0.0754907	0.0925386	0.090119	0.0886303	0.0934691	0.108319	0.0680381	0.0858782	0.0951923	0.115223	0.111139	0.0945445	0.0830171	0.00278484	0.0962411	0.0924252	0.105227	0.0962294	0.0909763	0.0925926	0.0714075	0.0593859	0.0863474	0.0934602	0.00314898	0.0684711	0.00265788	0.0773911	0.0650003	0.0681691
Otu0000270	0.131981	0.143011	0.118708	0.120155	0.135126	0.0958562	0.135064	0.0876277	0.132496	0.115547	0.135813	0.105781	0.107962	0.0986045	0.128425	0.0856216	0.150879	0.144557	0.13493	0.084927	0.150804	0.117155	0.127328	0.070701	0.134779	0.0784439	0.134829	0.0847125	0.129841	0.156094	0.114987	0.0745459	0.104896	0.122822	0.122207	0.0996295	0.120287	0.0919761	0.140046	0.0726386	0.101248	0.0652011	0.119285	0.0745258	0.111769	0.101885	0.140549	0.0975004	0.028746
Otu0000271	0.0652049	0.051915	0.0646536	0.043565	0.0725068	0.0650767	0.0654215	0.0610441	0.073929	0.0572127	0.07313	0.0533071	0.0431849	0.052852	0.0664268	0.069692	0.0924743	0.0727984	0.0683893	0.0534726	0.0719745	0.0510674	0.0661607	0.0730977	0.0760714	0.0584327	0.0601147	0.0576394	0.075669	0.0586913	0.0715472	0.0516739	0.0816887	0.0742431	0.0646977	0.0727631	0.0569357	0.0819787	0.0671296	0.045553	0.0710684	0.0660822	0.0737844	0.0650789	0.0563879	0.0620172	0.0471463	0.0679549	0.0533855
Otu0000272	0.0274961	0.0284063	0.0349765	0.0428624	0.02719	0.0395737	0.0485386	0.0452907	0.0364844	0.02468	0.0510749	0.0349828	0.0134953	0.0323423	0.0354276	0.0179208	0.0340695	0.0478389	0.0508299	0.0251636	0.0308462	0.0360476	0.0411944	0.033553	0.0231522	0.0144081	0.0455154	0.0401729	0.0300956	0.0462038	0.0468464	0.0465912	0.0306333	0.0302472	0.0616168	0.0436579	0.0416994	0.0329914	0.0208333	0.0172363	0.0223914	0.0176219	0.0405814	0.0209932	0.0221524	0.0354384	0.0240179	0.0310229	0.0796675
Otu0000273	0.0644193	0.0411402	0.0487552	0.0344304	0.0568519	0.0501266	0.0495938	0.0383987	0.0672082	0.0560909	0.0487533	0.032484	0.0548808	0.0536409	0.0453916	0.0507756	0.0474539	0.0707184	0.0489816	0.0534726	0.0811141	0.0630833	0.0449393	0.0587178	0.0628416	0.0408229	0.0575384	0.0366796	0.041274	0.0418332	0.0451429	0.0474383	0.0566251	0.0659939	0.0503204	0.0514939	0.0689644	0.0559854	0.0590278	0.0800256	0.0525711	0.0599145	0.0528788	0.0734762	0.0614226	0.0708767	0.0604896	0.0709094	0.015605
Otu0000274	0.135909	0.12538	0.111289	0.0562129	0.124415	0.12048	0.0991875	0.0876277	0.124815	0.113304	0.0946046	0.0891228	0.117859	0.112015	0.117354	0.0487844	0.130194	0.088398	0.119219	0.0896452	0.110818	0.123163	0.0898787	0.0790893	0.131471	0.168094	0.128817	0.0960657	0.116943	0.102398	0.0970998	0.08217	0.12439	0.100824	0.077021	0.0996295	0.10906	0.118969	0.128472	0.0972619	0.133375	0.133927	0.108217	0.0829231	0.129894	0.117833	0.0809493	0.0842049	0
Otu0000275	0.0510641	0.0440788	0.0561744	0.0625369	0.0395491	0.0272619	0.0590904	0.0630132	0.0662481	0.0639436	0.0528161	0.0491425	0.0449843	0.043386	0.0453916	0.0607316	0.0413701	0.0478389	0.0757828	0.0503271	0.0628349	0.0550727	0.0661607	0.0479329	0.0446506	0.0432242	0.0687026	0.0445395	0.0421339	0.0680569	0.0459946	0.0703104	0.036203	0.0485788	0.057509	0.0638076	0.0505204	0.0359906	0.0659722	0.0615582	0.0477034	0.000881096	0.0491896	0.0587809	0.0342355	0.044298	0.0667165	0.0679549	0.0320313
Otu0000276	0.0699185	0.0509354	0.060414	0.0653475	0.0510843	0.0527649	0.0696423	0.0777819	0.0710486	0.0605782	0.0539769	0.076629	0.0566802	0.0567962	0.0531414	0.04978	0.0584048	0.0644786	0.0489816	0.0440362	0.0616924	0.0600793	0.0511809	0.0479329	0.0694565	0.0896502	0.0704201	0.0751059	0.06879	0.0474525	0.0536604	0.08217	0.0612665	0.0669105	0.077021	0.0727631	0.0601434	0.0699818	0.0671296	0.100955	0.06328	0.0801797	0.0959197	0.0902707	0.0684711	0.0496137	0.0613792	0.0915913	0.0114984
Otu0000277	0.0832738	0.0764032	0.0890312	0.0646449	0.0881616	0.0861826	0.0643664	0.072859	0.0844903	0.0583345	0.0684868	0.0707985	0.0836707	0.0844055	0.0730695	0.0766612	0.0717893	0.0769583	0.0739344	0.0707725	0.0788292	0.0921216	0.0836371	0.0766926	0.0735908	0.0792444	0.0893133	0.0847125	0.082548	0.0718032	0.075806	0.0669219	0.0770473	0.0971577	0.0842097	0.0805991	0.0890122	0.101973	0.0717593	0.0947996	0.0837244	0.0863474	0.0688654	0.0850224	0.0936443	0.103657	0.0782807	0.090114	0.0123197
Otu0000278	0	0.0901166	0.090091	0.108913	0.0865137	0.093218	0.102353	0.0955044	0.110413	0.0796491	0.101569	0.0907887	0.0764732	0.0796725	0.0852477	0.084626	0.0961246	0.125837	0.11275	0.0534726	0.0913962	0.00100132	0.11859	0.00119832	0.00248059	0.0792444	0.0996187	0.0934457	0.0928665	0.0974026	0.0911375	0.0965709	0.0983978	0.00274975	0.0985869	0.00223886	0.105852	0.0739808	0.0891204	0.00369349	0.0983275	0.0634389	0.124204	0.00104966	0.115797	0.0956836	0.1192	0.00147728	0.0271034
Otu0000279	0.0636337	0.089137	0.0922108	0.103994	0.069211	0.0580414	0.0633112	0.0905815	0.0518463	0.0605782	0.0806751	0.0832924	0.0602789	0.0615292	0.0653197	0.0617272	0.0742228	0.0759183	0.0859488	0.0770634	0.0536953	0.0670886	0.0786438	0.0958658	0.0611879	0.0648363	0.0446567	0.0593861	0.0670702	0.0743007	0.0741025	0.0720046	0.0584817	0.0815758	0.0544282	0.0694048	0.0737759	0.0629836	0.0590278	0.0837191	0.0593859	0.06432	0.0713249	0.0713768	0.0614226	0.0664469	0.0800598	0.0664776	0.00739183
Otu0000280	0.0502785	0.0411402	0.0625338	0.0505916	0.0584998	0.0439707	0.0612008	0.0482445	0.0508862	0.0403855	0.0528161	0.0558059	0.0539811	0.0504855	0.0653197	0.0418152	0.0498874	0.044719	0.0517541	0.0471817	0.0411283	0.0460608	0.0561742	0.0383463	0.0463043	0.0552309	0.0583972	0.0401729	0.0395542	0.0655594	0.0672884	0.0508268	0.0677645	0.0641607	0.0523743	0.0380607	0.0513224	0.0429888	0.0520833	0.0320102	0.0535447	0.0378871	0.0627167	0.046185	0.0674642	0.0487278	0.0533732	0.0576139	0.0829528
Otu0000281	0.0942722	0.0989323	0.0784322	0.0801034	0.0815701	0.097615	0.0960219	0.0866432	0.0969718	0.102085	0.0719692	0.065801	0.0917679	0.0899273	0.0852477	0.084626	0.108292	0.0769583	0.0914938	0.0691998	0.102821	0.0851123	0.0948719	0.0623128	0.10005	0.110462	0.086737	0.0663726	0.0885671	0.0955295	0.0919893	0.0728517	0.122533	0.101741	0.0893444	0.0604493	0.101843	0.112971	0.100694	0.100955	0.14019	0.115424	0.113136	0.0839728	0.124859	0.0885959	0.0853971	0.0886368	0.00903446
Otu0000282	0.0722753	0.123421	0.10281	0.0941567	0.112056	0.131033	0.0865253	0.111258	0.0969718	0.0729182	0.112597	0.0791278	0.0782726	0.0883497	0.112926	0.054758	0.122893	0.0717584	0.128461	0.0817816	0.12567	0.0991309	0.0961202	0.0683044	0.0835132	0.0880493	0.109065	0.0838391	0.119523	0.106768	0.113283	0.0779344	0.0872584	0.0705768	0.0893444	0.075002	0.118683	0.0929758	0.099537	0.109574	0.0749625	0.0898718	0.104528	0.043036	0.0946512	0.0797363	0.075612	0.0546593	0.015605
Otu0000283	0.0801314	0.10285	0.0858515	0.12156	0.0939292	0.114324	0.0970771	0.103381	0.073929	0.0706745	0.128268	0.132435	0.0737742	0.118325	0.102962	0.0686964	0.0644887	0.0811182	0.0730102	0.102227	0.0628349	0.0921216	0.0923753	0.0647094	0.0686296	0.0912511	0.108207	0.0873324	0.082548	0.0936563	0.124356	0.0770873	0.0491989	0.100824	0.0996139	0.113063	0.0625491	0.0789795	0.09375	0.0566335	0.050624	0.0581523	0.0787034	0.0734762	0.0453117	0.0761925	0.0782807	0.0709094	0.00410657
Otu0000284	0.0573489	0.0617103	0.0423958	0.0590236	0.055204	0.072112	0.0474834	0.0590749	0.0595272	0.0527255	0.0661652	0.0566388	0.065677	0.0591627	0.0553557	0.0527668	0.0693557	0.0623986	0.0720861	0.0550453	0.0525528	0.0490648	0.0536775	0.0551228	0.0636685	0.0584327	0.0618323	0.0689926	0.0730894	0.0655594	0.0698437	0.0516739	0.065908	0.0458291	0.0605899	0.0660465	0.0713701	0.0519865	0.056713	0.0418595	0.0662007	0.0616767	0.0553383	0.0482843	0.0563879	0.0522716	0.0613792	0.0531821	0.0402444
Otu0000285	0.0746321	0.0479969	0.0635937	0.0625369	0.02719	0.0175883	0.0580352	0.0472599	0.0499261	0.0426291	0.0574593	0.0466437	0.0521817	0.0425972	0.0442845	0.0587404	0.0474539	0.0353592	0.0582234	0.0487544	0.0365585	0.0490648	0.0624157	0.0467346	0.0620147	0.0360202	0.0575384	0.0489062	0.0515925	0.0693057	0.0545122	0.0516739	0.052912	0.0568281	0.0595629	0.0458967	0.0497185	0.0349909	0.0578704	0.0418595	0.0399151	0.0281951	0.0504193	0.0577313	0.0443048	0.0531576	0.0773911	0.0620457	0.0262821
Otu0000286	0.00549921	0.00587717	0.00741926	0.00632396	0.00906335	0.0061559	0.00633112	0.0127996	0.0057607	0.0112182	0.0127687	0.00916216	0.017094	0.000788836	0.0110711	0.009956	0.00973414	0.0103998	0.00831762	0.0141545	0.00114245	0.00700925	0.00624157	0.00718993	0.00826863	0.00640359	0.000858782	0.00785992	0.0120382	0.00999001	0.00511052	0.0067769	0.0139242	0.00641607	0.00718863	0	0.0128306	0	0.00694444	0.00861814	0.0136295	0	0.0061487	0	0.00201386	0.00708767	0.0106746	0.00147728	0.0854167
Otu0000287	0.0314241	0.0382016	0.0466354	0.0316198	0.0247182	0.0184677	0.0400971	0.0255991	0.0268833	0.0392636	0.0319218	0.0374816	0.0260909	0.0370753	0.038749	0.0388284	0.015818	0.0270394	0.0434365	0.0220181	0.0171368	0.028037	0.0362011	0.0191732	0.0231522	0.0224126	0.0257635	0.0305664	0.0223567	0.0380869	0.0408841	0.0347316	0.0222787	0.0458291	0.0421048	0.0223886	0.027265	0.0159958	0.0335648	0.0283168	0.0146031	0.0176219	0.0319732	0.0199435	0.0191316	0.0301226	0.0346926	0.0502275	0.110056
Otu0000288	0.0455649	0.053874	0.0572343	0.0583209	0.0617955	0.0474884	0.0411523	0.0531674	0.0364844	0.0504818	0.0545573	0.0516413	0.0602789	0.0291869	0.0885691	0.07467	0.0316359	0.0488789	0.0508299	0.0534726	0.0422707	0.056074	0.0536775	0.0539245	0.0446506	0.0656368	0.0506681	0.0375529	0.0455734	0.0549451	0.0459946	0.0542152	0.0519837	0.0494954	0.0451857	0.0470162	0.0641529	0.0359906	0.056713	0.0492465	0.0467299	0.0414115	0.056568	0.0755755	0.0634364	0.0558154	0.0622687	0.073864	0.0213542
Otu0000289	0.023568	0.0156724	0.0158984	0.0295118	0.0313097	0.0114324	0.0200485	0.0246145	0.0201625	0.0291673	0.0319218	0.0208231	0.0197931	0.0228763	0.0243565	0.0179208	0.020685	0.0197596	0.0221803	0.0188727	0.025134	0.0220291	0.023718	0.0143799	0.0305939	0.0176099	0.027481	0.0227064	0.0257962	0.0312188	0.00936928	0.0338845	0.0380595	0.0293306	0.0225928	0.0279858	0.0312746	0.022994	0.025463	0.0246233	0.0243385	0.0167408	0.0258245	0.0283408	0.0372563	0.0256928	0.0346926	0.0251138	0.0722757
Otu0000290	0.0707041	0.0666079	0.069953	0.0709688	0.069211	0.0518855	0.0685871	0.0679361	0.0508862	0.0673091	0.0650044	0.0749631	0.0836707	0.0741506	0.0464988	0.0587404	0.0754396	0.0665585	0.0905697	0.073918	0.0868264	0.059078	0.087382	0.0695027	0.0702834	0.0800448	0.0712789	0.0751059	0.0644906	0.0624376	0.068992	0.0813229	0.065908	0.0604944	0.0801019	0.0794797	0.0681625	0.0639834	0.0659722	0.0911061	0.0905391	0.045817	0.0405814	0.104966	0.0765265	0.0717627	0.0693851	0.0871595	0.00410657
Otu0000291	0.0738465	0.0636693	0.0572343	0.0379437	0.0733307	0.0554031	0.0517041	0.0354449	0.0864105	0.0706745	0.0626828	0.0366486	0.0647773	0.0623181	0.0476059	0.0487844	0.0644887	0.0675985	0.056375	0.0330272	0.0845415	0.0610806	0.0661607	0.0467346	0.0942624	0.0744417	0.0721377	0.0558928	0.0773887	0.0574426	0.0596227	0.0398143	0.0854019	0.0861587	0.0667516	0.0526133	0.0737759	0.0639834	0.056713	0.0590958	0.0652271	0.0784176	0.0627167	0.0629796	0.0785404	0.064675	0.057821	0.0531821	0.0583133
Otu0000292	0.0251392	0.0235087	0.0211979	0.0196745	0.0173027	0.0299001	0.0221589	0.0226454	0.0240029	0.0213145	0.0191531	0.0208231	0.0215924	0.0228763	0.0210352	0.0288724	0.0219018	0.0218395	0.0304979	0.0235908	0.0217066	0.025033	0.0212214	0.0227681	0.0206716	0.0200112	0.0154581	0.0174665	0.0214969	0.0255994	0.0281078	0.0203307	0.0222787	0.0201648	0.0277276	0.0223886	0.0384918	0.0149961	0.0208333	0.0332414	0.0272591	0.027314	0.0270543	0.0220428	0.0352425	0.021263	0.0231284	0.010341	0.0648839
Otu0000293	0.0377089	0.0754236	0.080552	0.113831	0.0469646	0.0712326	0.0865253	0.0925507	0.0508862	0.0605782	0.0963458	0.124939	0.0503824	0.077306	0.0642126	0.0955775	0.036503	0.0727984	0.0656168	0.0880725	0.0468405	0.0851123	0.0823888	0.0814859	0.0578804	0.0528296	0.0858782	0.0803458	0.0601912	0.0686813	0.0775095	0.0914882	0.0408444	0.0641607	0.0872905	0.0951517	0.0425013	0.0779797	0.0868056	0.0960307	0.0350474	0.0704877	0.0762439	0.0671782	0.0402771	0.0664469	0.0720538	0.0812504	0.00410657
Otu0000294	0.0180688	0.0107748	0.0105989	0.0154586	0.0115352	0.0123118	0.00633112	0.0137841	0.0192023	0.0145836	0.0168315	0.0116609	0.0152946	0.0165656	0.0110711	0.014934	0.0194683	0.0228795	0.0240287	0.0188727	0.0137094	0.0210278	0.0112348	0.0251648	0.0132298	0.00960538	0.0180344	0.0157198	0.0197771	0.0106144	0.0238491	0.0110125	0.0120677	0.0201648	0.0143773	0.0123138	0.0160382	0.0179953	0.0266204	0.0196986	0.0136295	0.0140975	0.0196758	0.0167945	0.0302078	0.0106315	0.0231284	0.0132955	0.104307
Otu0000295	0.0565633	0.0910961	0.0487552	0.0505916	0.0766265	0.0773885	0.0601456	0.0787665	0.0777695	0.0538473	0.0713888	0.0682998	0.0503824	0.0749395	0.0520343	0.0428108	0.0766563	0.0686385	0.0850246	0.0629089	0.0811141	0.0771018	0.0549258	0.0611144	0.0669759	0.085648	0.054962	0.0759792	0.0670702	0.0649351	0.0715472	0.0728517	0.0686928	0.0595778	0.0616168	0.0761214	0.0561338	0.0839782	0.0613426	0.0701763	0.0525711	0.0819419	0.061487	0.049334	0.0463187	0.0504997	0.0587105	0.0605685	0.0361378
Otu0000296	0.0652049	0.0626898	0.0582942	0.0646449	0.0980489	0.102892	0.0749182	0.0935352	0.090251	0.07404	0.0847379	0.0641351	0.0296896	0.114381	0.0808193	0.0587404	0.0936911	0.0707184	0.0711619	0.0518998	0.070832	0.0730965	0.108603	0.0850809	0.0950893	0.0728408	0.0729965	0.0873324	0.0928665	0.0849151	0.101359	0.0626864	0.0965412	0.0870753	0.0626438	0.0996295	0.0874084	0.0719813	0.0694444	0.0517089	0.0915127	0.0722499	0.0676357	0.0608802	0.0634364	0.0637891	0.0658269	0.0797731	0.0279247
Otu0000297	0.0274961	0.0244882	0.0593541	0.1321	0.0189506	0.0325383	0.0485386	0.15261	0.0153619	0.0358982	0.0446905	0.124106	0.0287899	0.0394418	0.0464988	0.07467	0.0267689	0.0259994	0.0314221	0.0896452	0.0239915	0.0380502	0.0486843	0.077891	0.0214984	0.0368206	0.0171756	0.0314397	0.0197771	0.024975	0.0340701	0.0228721	0.029705	0.0320804	0.0256737	0.0246275	0.0168401	0.0339912	0.025463	0.0295479	0.0262856	0.027314	0.00983792	0.0230925	0.0322217	0.0301226	0.0151224	0.0132955	0.0566707
Otu0000298	0.0424225	0.0479969	0.00317968	0.0491863	0.00329576	0.0351766	0.0601456	0.0403678	0.00288035	0.0426291	0.0533965	0.0508084	0.0404858	0.0362865	0.0376418	0.0467932	0.0425868	0.0665585	0.046209	0.0267363	0.0548377	0.0390515	0.043691	0.0347513	0.0322477	0.0344193	0.0429391	0.00436662	0.048153	0.0649351	0.0485499	0.0406614	0	0.0549949	0.00205389	0.0425384	0.00561338	0.00199948	0.0532407	0.0233921	0.0331003	0.0317195	0.0442706	0.0482843	0.041284	0.044298	0.0542627	0.0590912	0.0542068
Otu0000299	0.0832738	0.0597512	0.0582942	0.0512943	0.0659152	0.0677149	0.0569801	0.054152	0.0508862	0.0673091	0.0481729	0.0691327	0.0764732	0.077306	0.0597841	0.0557536	0.0644887	0.0603186	0.0619201	0.0770634	0.0742594	0.0851123	0.0449393	0.0635111	0.0669759	0.0680381	0.0695613	0.064626	0.0765289	0.0643107	0.0570674	0.0830171	0.0854019	0.0549949	0.0739402	0.0638076	0.0793893	0.0659828	0.0740741	0.0787944	0.0837244	0.0652011	0.0639465	0.0713768	0.0765265	0.0602452	0.0773911	0.0797731	0.0164263
Otu0000300	0.015712	0.016652	0.00847916	0.0161612	0.0164788	0.0184677	0.0232141	0.0157533	0.0144018	0.0235582	0.0179923	0.0124939	0.00719748	0.0141991	0.0143925	0.00896039	0.0279856	0.0187196	0.0249529	0.0141545	0.0148519	0.0090119	0.0124831	0.0107849	0.00826863	0.0152085	0.0120229	0.0104799	0.0249364	0.0212288	0.0161833	0.0135538	0.0204222	0.010999	0.0225928	0.0190303	0.0200478	0.0259932	0.0173611	0.0135428	0.0165502	0.00969206	0.0159866	0.00629796	0.0251732	0.0141753	0.0231284	0.0147728	0.0714544
Otu0000301	0.0620625	0.0489764	0.060414	0.0512943	0.0642674	0.0773885	0.0527593	0.0462753	0.0864105	0.0527255	0.064424	0.0491425	0.0503824	0.0638957	0.0531414	0.059736	0.0547545	0.0592787	0.0545266	0.0534726	0.0639773	0.0620819	0.0773955	0.0575195	0.0653222	0.069639	0.0644086	0.064626	0.0722295	0.0555694	0.0638814	0.0720046	0.0556969	0.0797426	0.0862636	0.0481356	0.0809931	0.0709815	0.0601852	0.0726386	0.0623065	0.0652011	0.0713249	0.0661285	0.0594087	0.0708767	0.0640478	0.0576139	0.0213542
Otu0000302	0.01964	0.018611	0.020138	0.0344304	0.0181267	0.010553	0.0327108	0.0275683	0.0364844	0.0190709	0.033663	0.0183243	0.0197931	0.0205097	0.019928	0.0278768	0.0292024	0.0207995	0.0314221	0.0141545	0.0194217	0.0200264	0.0262146	0.033553	0.023979	0.0192108	0.0180344	0.0192131	0.0300956	0.0312188	0.0315148	0.0177894	0.0259919	0.0247477	0.0277276	0.0324635	0.0232554	0.0159958	0.0266204	0.00984931	0.0214179	0.00881096	0.0270543	0.0251918	0.0241663	0.0203771	0.0329135	0.0310229	0.0870594
Otu0000303	0.0416369	0.0646488	0.0667734	0.093454	0.0403731	0.0545237	0.0685871	0.0915661	0.0355243	0.07404	0.0493337	0.0932875	0.0422852	0.0575851	0.0542485	0.069692	0.0511042	0.0665585	0.0674652	0.0550453	0.0456981	0.0670886	0.0811405	0.0790893	0.0479581	0.0544305	0.0626911	0.0523995	0.0490129	0.0480769	0.0511051	0.0660748	0.0473423	0.0678271	0.0626438	0.0660465	0.0577376	0.0419891	0.0486111	0.0886438	0.0350474	0.0590334	0.056568	0.0692775	0.0402771	0.0531576	0.0471463	0.0827276	0.0336739
Otu0000304	0.0573489	0.0959937	0.0688932	0.0822114	0.0790983	0.12048	0.102353	0.0935352	0.0720088	0.0639436	0.0882203	0.098285	0.0611786	0.114381	0.0841406	0.0438064	0.118026	0.0925579	0.0757828	0.0817816	0.0696896	0.0931229	0.0848854	0.0790893	0.0628416	0.0888498	0.0987599	0.0751059	0.075669	0.0911588	0.10221	0.0694633	0.0389878	0.0586612	0.0677785	0.104107	0.0697663	0.0699818	0.0706019	0.0664828	0.0457563	0.0713688	0.0787034	0.0514333	0.069478	0.0815083	0.0533732	0.0576139	0.0238181
Otu0000305	0.00785601	0.0127339	0.0127187	0.0196745	0.00906335	0.00791473	0.016883	0.011815	0.0124815	0.0190709	0.00812555	0.00749631	0.0107962	0.00788836	0.00885691	0.00896039	0.00851737	0.0124797	0.00831762	0.00629089	0.012567	0.0130172	0.0137315	0.0107849	0.0132298	0.0104058	0.0103054	0.0113532	0.0120382	0.0187313	0.010221	0.0127067	0.00464141	0.00916582	0.019512	0.0123138	0.00561338	0.00699818	0.0127315	0.00738698	0.0048677	0.00440548	0.0135271	0.0136456	0.014097	0.00885959	0.00978508	0.00886368	0.106771
Otu0000306	0.084845	0.0940347	0.0710129	0.0646449	0.0947531	0.110806	0.0844149	0.0531674	0.0729689	0.0639436	0.0969262	0.0799607	0.0746739	0.0844055	0.0653197	0.0487844	0.128977	0.0748783	0.0868729	0.0581907	0.0822566	0.0911203	0.0798921	0.040743	0.0529192	0.0824462	0.074714	0.064626	0.104905	0.0799201	0.068992	0.0635335	0.0696211	0.0623276	0.0698324	0.0526133	0.0866065	0.0909763	0.0798611	0.045553	0.0554917	0.0660822	0.0700952	0.049334	0.0745126	0.0620172	0.0489254	0.0472729	0.0353165
Otu0000307	0.0494929	0.070526	0.0837317	0.0569156	0.0477885	0.0598002	0.0559249	0.0521828	0.0374446	0.0527255	0.0562985	0.0591376	0.0701754	0.0402307	0.0542485	0.039824	0.0571881	0.0540788	0.0480574	0.0927906	0.0525528	0.0600793	0.0362011	0.0551228	0.0388626	0.0712399	0.0635499	0.0733592	0.0576116	0.0599401	0.0374771	0.0457441	0.0259919	0.0559115	0.0523743	0.0481356	0.0449071	0.0659828	0.0625	0.0418595	0.0340739	0.0502225	0.0553383	0.0556319	0.0594087	0.0487278	0.0373612	0.0443184	0.0197116
Otu0000308	0.00785601	0.00979528	0.00635937	0.0105399	0.0156549	0.00791473	0.0105519	0.00984582	0.0144018	0.00673091	0.00522357	0.00416462	0.00899685	0.0110437	0.00664268	0.0119472	0.0182515	0.0103998	0.00831762	0.00786361	0.0102821	0.00801057	0.00624157	0.0167765	0.00909549	0.00560314	0.00601147	0.00785992	0.013758	0.00999001	0.0127763	0.0118596	0.0167091	0.010999	0.0154042	0.0111943	0.0128306	0.00599844	0.0104167	0.00984931	0.00584124	0.00969206	0.0135271	0.00629796	0.0110762	0.00531576	0.0133433	0.0147728	0.0985578
Otu0000309	0.0581345	0.0323244	0.0529947	0.0393491	0.0444928	0.051006	0.02849	0.0443062	0.0345642	0.0426291	0.0272786	0.032484	0.0413855	0.0347088	0.0243565	0.0328548	0.0292024	0.0301593	0.0277254	0.0518998	0.0342736	0.0430568	0.0374494	0.0251648	0.0231522	0.0440247	0.0412215	0.0410462	0.0309555	0.034965	0.0315148	0.037273	0.0417726	0.0348301	0.0410779	0.0458967	0.0224535	0.0439886	0.068287	0.067714	0.0301797	0.045817	0.0356625	0.046185	0.0402771	0.0363243	0.0382508	0.0428411	0.0188902
Otu0000310	0.0911298	0.087178	0.0667734	0.0695635	0.0939292	0.0765091	0.0654215	0.0472599	0.102732	0.0785273	0.0609416	0.076629	0.101664	0.082039	0.068641	0.039824	0.0827402	0.0675985	0.0702377	0.0534726	0.0948235	0.0831097	0.0536775	0.0515279	0.102531	0.104859	0.0807255	0.0567661	0.0868474	0.0580669	0.0604744	0.067769	0.0807604	0.0733266	0.0564821	0.0593299	0.102645	0.095975	0.0787037	0.067714	0.0798302	0.0995639	0.0602573	0.0566816	0.0614226	0.0815083	0.0560418	0.0502275	0.0386018
Otu0000311	0.0290673	0.0313449	0.040276	0.0337278	0.0362534	0.0474884	0.0295452	0.0452907	0.0451255	0.0426291	0.0348238	0.0499754	0.0422852	0.0370753	0.0354276	0.04978	0.0401533	0.043679	0.0397398	0.0550453	0.0445556	0.0390515	0.0224697	0.0323547	0.0289402	0.0400224	0.0206108	0.0462862	0.0309555	0.0430819	0.0332183	0.0415085	0.0445575	0.039413	0.037997	0.0291052	0.0384918	0.0419891	0.0462963	0.0590958	0.0311533	0.037006	0.0356625	0.0503837	0.0443048	0.0407541	0.0471463	0.0561366	0.0246394
Otu0000312	0.0447793	0.0479969	0.049815	0.0779954	0.0387252	0.0474884	0.0538145	0.0787665	0.0297636	0.0448727	0.0522357	0.065801	0.048583	0.0560074	0.0763908	0.118476	0.0413701	0.044719	0.0582234	0.143118	0.0445556	0.0550727	0.0549258	0.184542	0.0413432	0.0504282	0.0652674	0.0585127	0.0326752	0.0493257	0.0570674	0.060145	0.029705	0.0430793	0.0492935	0.0503745	0.0304726	0.0669826	0.0393519	0.0775633	0.0399151	0.06432	0.0467301	0.0745258	0.0292009	0.0575874	0.049815	0.0605685	0.00492789
Otu0000313	0.0172832	0.0195906	0.0169583	0.0252958	0.0222464	0.0237442	0.0295452	0.030522	0.0240029	0.02468	0.0249571	0.0274865	0.0134953	0.0291869	0.0210352	0.0189164	0.020685	0.0228795	0.0212561	0.0173	0.0308462	0.025033	0.0187247	0.0191732	0.0115761	0.0184103	0.0300574	0.0270731	0.0266561	0.0293457	0.0306631	0.0313432	0.0213505	0.0183316	0.0236198	0.0268664	0.0152363	0.0189951	0.0289352	0.0160051	0.0223914	0.0246707	0.0270543	0.0199435	0.0221524	0.0159473	0.0249075	0.0162501	0.0681691
Otu0000314	0.0314241	0.053874	0.0635937	0.0899407	0.0379013	0.0580414	0.0960219	0.0807357	0.0470457	0.0605782	0.0812555	0.0957862	0.0350877	0.052852	0.0376418	0.0428108	0.0340695	0.046799	0.056375	0.0676271	0.0399858	0.0430568	0.0499326	0.0395446	0.0438237	0.0408229	0.0635499	0.0515261	0.0369746	0.0549451	0.0604744	0.0745459	0.0445575	0.0513286	0.0729132	0.0671659	0.0392937	0.0549857	0.0428241	0.0406284	0.0369945	0.0396493	0.0504193	0.0545823	0.0392702	0.0513856	0.057821	0.073864	0.0410657
Otu0000315	0.0392801	0.0264473	0.0190781	0.0281065	0.02719	0.0325383	0.0232141	0.0324912	0.0268833	0.0358982	0.0261178	0.0191572	0.0305893	0.0189321	0.019928	0.0169252	0.0389365	0.0280794	0.0184836	0.0220181	0.0274189	0.0220291	0.0162281	0.0191732	0.0256328	0.0376211	0.0223283	0.0139732	0.0335351	0.0143606	0.0272561	0.0271076	0.0380595	0.0339135	0.0236198	0.0223886	0.0208497	0.0319917	0.0289352	0.0233921	0.0418622	0.0281951	0.0135271	0.0178442	0.0332286	0.021263	0.0177911	0.0147728	0.116627
Otu0000316	0.0455649	0.0254677	0.0264974	0.0372411	0.042021	0.0237442	0.0211037	0.0334758	0.0528064	0.03702	0.0313414	0.0358157	0.0287899	0.0418083	0.0354276	0.0338504	0.0328527	0.045759	0.0341947	0.0377453	0.0399858	0.0360476	0.0374494	0.0383463	0.0322477	0.0344193	0.0334925	0.0331863	0.0326752	0.0287213	0.0306631	0.0228721	0.0454858	0.039413	0.0267006	0.0402996	0.0473128	0.0389899	0.037037	0.0307791	0.0447828	0.0422926	0.033203	0.0356884	0.0463187	0.0345524	0.0542627	0.036932	0.0607773
Otu0000317	0.0149264	0.0176315	0.00741926	0.0196745	0.02719	0.025503	0.0179382	0.0295374	0.0259232	0.0145836	0.0290198	0.0249877	0.0152946	0.0212986	0.0254636	0.0139384	0.0219018	0.0124797	0.025877	0.0173	0.0205641	0.0230304	0.0187247	0.0215698	0.0173641	0.0120067	0.0120229	0.0209598	0.0257962	0.0193556	0.0281078	0.0254134	0.0259919	0.0174151	0.0225928	0.0179109	0.0208497	0.0119969	0.0185185	0.0246233	0.025312	0.0281951	0.0245948	0.0272911	0.0100693	0.0239209	0.0213493	0.0206819	0.0747396
Otu0000318	0	0.0734646	0.0688932	0.0105399	0	0.133671	0.0348211	0.00590749	0	0.0706745	0.0319218	0.00749631	0.000899685	0.430705	0.245779	0.0567492	0	0.0228795	0.0656168	0.00943634	0	0.0460608	0.285864	0.0215698	0	0	0	0	0	0	0	0	0	0	0	0	0	0	0	0	0	0	0	0	0	0	0	0	0.00164263
Otu0000319	0.0243536	0.016652	0.0148385	0.0147559	0.0214225	0.0123118	0.0253245	0.00984582	0.0192023	0.0190709	0.0226355	0.0183243	0.0125956	0.0181432	0.0166067	0.0179208	0	0.0291193	0.0221803	0.0204454	0.025134	0	0.00998652	0.0167765	0.0214984	0.016009	0	0.0130999	0.0292357	0.0312188	0.0247008	0.0245663	0.0213505	0.0265809	0.0287545	0.0212692	0.0200478	0.0159958	0.0162037	0.00246233	0.0155766	0.00792986	0.0159866	0.0262415	0.014097	0.0230349	0.0222388	0.00147728	0.127304
Otu0000320	0	0	0	0.000702662	0.00082394	0	0	0	0.000960117	0	0	0.000832924	0	0	0	0	0	0.00623986	0	0	0	0	0	0	0	0	0	0	0	0	0	0.000847113	0	0	0	0	0	0	0	0	0.000973539	0	0	0	0	0.000885959	0	0	0.0772036
Otu0000321	0.0314241	0.0401606	0.0381562	0.0526996	0.0395491	0.0413325	0.0400971	0.0610441	0.032644	0.0471164	0.0475925	0.0741302	0.0332883	0.0410195	0.0354276	0.0577448	0.0316359	0.046799	0.0323463	0.0440362	0.0377009	0.0460608	0.0636641	0.0431396	0.0281133	0.0440247	0.0334925	0.0384263	0.0361147	0.0368382	0.0434394	0.0474383	0.0315616	0.0384964	0.0287545	0.0391801	0.0344822	0.0409893	0.0324074	0.0357037	0.0331003	0.0378871	0.0319732	0.0503837	0.0382633	0.0363243	0.0329135	0.0650003	0.0229968
Otu0000322	0.096629	0.0881575	0.0794921	0.0632396	0.069211	0.0809061	0.0685871	0.0403678	0.0595272	0.0785273	0.0766123	0.0741302	0.0980657	0.0859832	0.0730695	0.0706876	0.0790899	0.0800782	0.0914938	0.0864997	0.0856839	0.0690912	0.0686573	0.0611144	0.0835132	0.0784439	0.0875958	0.0882058	0.0601912	0.0799201	0.0877305	0.0686162	0.0751908	0.089825	0.0831827	0.0593299	0.0713701	0.0849779	0.0694444	0.0775633	0.0769096	0.105732	0.0774736	0.0818734	0.0896166	0.0770785	0.0782807	0.0694321	0.00739183
Otu0000323	0.0439937	0.0577921	0.0392161	0.041457	0.0453167	0.0562825	0.0495938	0.042337	0.0441654	0.0617	0.0354042	0.05414	0.0413855	0.048119	0.0653197	0.0507756	0.0377198	0.0499189	0.0268012	0.0440362	0.0502679	0.0370489	0.0386978	0.0671061	0.0438237	0.0552309	0.0437979	0.0567661	0.0378345	0.0455794	0.0459946	0.0465912	0.0380595	0.0357467	0.0554551	0.0649271	0.0473128	0.0529862	0.0625	0.0627893	0.0447828	0.0414115	0.0479599	0.049334	0.0292009	0.0478418	0.0400299	0.0472729	0.0172476
Otu0000324	0.0243536	0.0215496	0.0264974	0.0309171	0.0255422	0.0334178	0.0306004	0.0206762	0.0297636	0.02468	0.0261178	0.0241548	0.0206928	0.0370753	0.0232494	0.019912	0.0292024	0.0270394	0.0175594	0.0377453	0.0262764	0.0270357	0.0249663	0.0179748	0.0231522	0.0368206	0.0291986	0.032313	0.0266561	0.0268482	0.0383289	0.0321903	0.0427009	0.0302472	0.0338893	0.0313441	0.0240574	0.0239938	0.0358796	0.0295479	0.0214179	0.0299573	0.0270543	0.0241422	0.027187	0.0248069	0.0284657	0.0251138	0.110877
Otu0000325	0.0494929	0.0489764	0.0445156	0.0512943	0.0642674	0.0598002	0.062256	0.0600595	0.0643278	0.04936	0.061522	0.0574717	0.0530814	0.0520632	0.068641	0.0657096	0.0851737	0.0592787	0.0683893	0.0314545	0.0696896	0.0650859	0.0461876	0.0563212	0.0570536	0.0568318	0.0601147	0.0698659	0.0644906	0.0736763	0.0800647	0.0643806	0.0631231	0.0669105	0.058536	0.0727631	0.0761816	0.0659828	0.0787037	0.0664828	0.0642536	0.045817	0.061487	0.0535326	0.0573949	0.0682189	0.067606	0.0679549	0.0205329
Otu0000326	0.0447793	0.0558331	0.0381562	0.0590236	0.0617955	0.0492472	0.0443178	0.0630132	0.0643278	0.0471164	0.061522	0.0424791	0.0368871	0.0536409	0.048713	0.044802	0.0778731	0.0717584	0.076707	0.0345999	0.0674047	0.0580767	0.0649124	0.0599161	0.0653222	0.0440247	0.0583972	0.0454129	0.055032	0.0405844	0.0587709	0.0482854	0.0603383	0.0678271	0.0513474	0.0582105	0.0689644	0.0299922	0.0532407	0.0332414	0.0554917	0.0475792	0.061487	0.0472347	0.0614226	0.0380963	0.0729434	0.0605685	0.0615986
Otu0000327	0.0400657	0.0430992	0.0349765	0.0583209	0.0288379	0.0272619	0.0474834	0.0285529	0.0355243	0.0291673	0.0400474	0.0316511	0.0377868	0.0354976	0.0553557	0.0358416	0.0450204	0.0301593	0.0388156	0.0330272	0.025134	0.0350463	0.0486843	0.0431396	0.0372088	0.0336188	0.0420803	0.0392996	0.0369746	0.0487013	0.0408841	0.0347316	0.0399161	0.0421628	0.0328623	0.0347024	0.036086	0.0469878	0.0277778	0.0369349	0.0369945	0.0308384	0.0270543	0.0472347	0.0322217	0.0513856	0.0658269	0.0502275	0.0336739
Otu0000328	0.0722753	0.0636693	0.069953	0.0534023	0.0444928	0.0641973	0.0548697	0.0580903	0.041285	0.0673091	0.0406278	0.0782948	0.0602789	0.0694176	0.0619983	0.0677008	0.0450204	0.0478389	0.0517541	0.0629089	0.0571226	0.059078	0.043691	0.0635111	0.0702834	0.0736412	0.0661262	0.0724859	0.0404141	0.0549451	0.0511051	0.0855584	0.0408444	0.0577447	0.058536	0.0805991	0.05453	0.0719813	0.0590278	0.108342	0.06328	0.0766554	0.0627167	0.101817	0.0634364	0.0735346	0.0631583	0.0915913	0.00903446
Otu0000329	0.0345665	0.051915	0.0614739	0.0772928	0.0222464	0.0641973	0.0569801	0.0689207	0.0384047	0.0617	0.0441101	0.0741302	0.0350877	0.0575851	0.0464988	0.0677008	0.0340695	0.045759	0.0545266	0.0754907	0.0319887	0.0690912	0.0561742	0.0515279	0.0330745	0.0632354	0.0532445	0.0663726	0.020637	0.0499501	0.0459946	0.0720046	0.036203	0.0623276	0.0595629	0.0671659	0.0296707	0.0709815	0.0474537	0.0627893	0.0321268	0.0555091	0.056568	0.0650789	0.0332286	0.0593593	0.0596001	0.0590912	0.0188902
Otu0000330	0.0345665	0.0264473	0.0339166	0.047781	0.0296619	0.0413325	0.0432626	0.0403678	0.0422451	0.0516036	0.0388866	0.0483096	0.0305893	0.038653	0.0376418	0.0457976	0.020685	0.043679	0.0397398	0.0345999	0.0308462	0.0360476	0.0561742	0.033553	0.0305939	0.0224126	0.039504	0.0427929	0.027516	0.0393357	0.0357736	0.0626864	0.0278484	0.0311638	0.0410779	0.0324635	0.0400956	0.0339912	0.037037	0.0615582	0.0389416	0.0405304	0.0455004	0.0503837	0.0352425	0.0522716	0.049815	0.0546593	0.028746
Otu0000331	0.0722753	0.0734646	0.0731327	0.0941567	0.0741546	0.0782679	0.073863	0.0817203	0.0681683	0.0762836	0.0696476	0.0716314	0.0692758	0.0686288	0.0453916	0.069692	0.0705725	0.0748783	0.0794795	0.0723452	0.0971085	0.0630833	0.0748989	0.0671061	0.0678028	0.0840471	0.0833018	0.0812192	0.0653505	0.083042	0.0885823	0.0813229	0.0909715	0.0632441	0.0852366	0.0761214	0.0874084	0.0699818	0.0659722	0.0541712	0.0944333	0.0696066	0.0676357	0.0713768	0.0664572	0.0788504	0.0524836	0.073864	0.0369592
Otu0000332	0.0227824	0.0235087	0.0222578	0.0168639	0.0173027	0.0246236	0.0253245	0.0315066	0.0336041	0.0168273	0.0220551	0.0208231	0.0179937	0.0173544	0.019928	0.0179208	0.0267689	0.0218395	0.0138627	0.0157272	0.0159943	0.031041	0.0299596	0.0131815	0.0198447	0.0216121	0.0206108	0.0192131	0.0257962	0.0287213	0.0212938	0.0203307	0.0241353	0.0238311	0.0133503	0.0134332	0.0248593	0.0209945	0.025463	0.00861814	0.0165502	0.0158597	0.0110677	0.0167945	0.0211455	0.0141753	0.016012	0.010341	0.128125
Otu0000333	0.0502785	0.053874	0.0413359	0.0885354	0.0346055	0.0413325	0.0643664	0.0886123	0.00480058	0.0673091	0.0783535	0.124106	0.0602789	0.0536409	0.00442845	0.0288724	0.0219018	0.0259994	0.0240287	0.0361726	0.0399858	0.0490648	0.0386978	0.0395446	0.0347283	0.0592332	0.0601147	0.0855858	0.0447135	0.0343407	0.0672884	0.0880998	0.0844736	0.0632441	0.0883175	0.0503745	0.045709	0.0309919	0.0486111	0.075101	0.0311533	0.0466981	0.0577978	0.0535326	0.0342355	0.0575874	0.0471463	0.0428411	0.0295673
Otu0000334	0.0549921	0.0362425	0.0572343	0.0526996	0.0807462	0.0712326	0.0612008	0.0610441	0.0508862	0.0628218	0.0650044	0.043312	0.0692758	0.0678399	0.058677	0.0328548	0.0632719	0.0582387	0.036043	0.0534726	0.0616924	0.0530701	0.0287112	0.0443379	0.0719371	0.076843	0.0506681	0.0829658	0.0679301	0.0655594	0.0783612	0.0753931	0.036203	0.0449125	0.0338893	0.0447773	0.0449071	0.0519865	0.0219907	0.05294	0.0477034	0.0748932	0.0344327	0.0272911	0.0785404	0.0708767	0.0462568	0.0325001	0.0336739
Otu0000335	0.0298529	0.0146929	0.0105989	0.0091346	0.0189506	0.0158295	0.0179382	0.0108304	0.0220827	0.00897455	0.0156707	0.0124939	0.014395	0.0126214	0.0154996	0.014934	0.0292024	0.0249594	0.0175594	0.0173	0.0182792	0.0180238	0.0249663	0.0131815	0.0305939	0.016009	0.0231871	0.0130999	0.0197771	0.0212288	0.0144798	0.0110125	0.0204222	0.0201648	0.0112964	0.0123138	0.0248593	0.0099974	0.0219907	0.0123116	0.0146031	0.0114542	0.0110677	0.00944693	0.014097	0.0141753	0.0124537	0.010341	0.142087
Otu0000336	0.0314241	0.0342835	0.040276	0.0372411	0.0304858	0.0290207	0.0242693	0.0206762	0.0259232	0.0336545	0.0237963	0.0258206	0.0359874	0.0260316	0.0321063	0.0527668	0.015818	0.0395191	0.0240287	0.0424635	0.0445556	0.0380502	0.0162281	0.0395446	0.0330745	0.0336188	0.0300574	0.034933	0.027516	0.0255994	0.0298113	0.0304961	0.029705	0.0256643	0.0308084	0.0223886	0.0296707	0.0249935	0.037037	0.0381661	0.0262856	0.0396493	0.0455004	0.0377877	0.028194	0.0372103	0.0249075	0.036932	0.03121
Otu0000337	0.0714897	0.0695465	0.0869114	0.0632396	0.0650913	0.0861826	0.0749182	0.0787665	0.057607	0.0852582	0.0690672	0.0891228	0.0647773	0.0709953	0.0863548	0.0965731	0.0450204	0.0675985	0.082252	0.105372	0.0674047	0.0791044	0.0923753	0.0826842	0.0661491	0.0784439	0.0841606	0.0794725	0.0447135	0.0568182	0.079213	0.097418	0.0742625	0.0815758	0.0513474	0.0895546	0.0625491	0.072981	0.0949074	0.0874126	0.073989	0.0907529	0.0959197	0.0934197	0.0714919	0.08771	0.0862867	0.0472729	0.015605
Otu0000338	0.0314241	0.0323244	0.0233177	0.0407544	0.0370773	0.0439707	0.0306004	0.0364295	0.0316839	0.0381418	0.030761	0.0308182	0.0359874	0.0291869	0.0332134	0.019912	0.0267689	0.043679	0.036043	0.0267363	0.0445556	0.0290383	0.0299596	0.0419413	0.0380357	0.0288161	0.0386452	0.0305664	0.0369746	0.03996	0.0374771	0.0423557	0.0380595	0.0357467	0.0338893	0.0313441	0.0368879	0.0289925	0.0393519	0.0320102	0.0369945	0.0405304	0.0356625	0.0377877	0.0453117	0.0345524	0.0382508	0.0472729	0.0476363
Otu0000339	0.0306385	0.0264473	0.0211979	0.0302145	0.0428449	0.0228648	0.0274348	0.0206762	0.0268833	0.0269236	0.0359846	0.0241548	0.0368871	0.0244539	0.0309992	0.0228988	0.0316359	0.0384791	0.0286496	0.0157272	0.0434132	0.0330436	0.0312079	0.0311564	0.0339014	0.0240134	0.0249047	0.0253264	0.0257962	0.0430819	0.0289596	0.0338845	0.0343464	0.0320804	0.018485	0.0268664	0.0513224	0.0299922	0.0277778	0.0295479	0.0165502	0.0193841	0.0455004	0.0346388	0.0251732	0.0336665	0.0329135	0.0310229	0.0566707
Otu0000340	0.0707041	0.0617103	0.0445156	0.0618342	0.0914574	0.082665	0.0801942	0.0777819	0.098892	0.0639436	0.0771927	0.0524742	0.0782726	0.0922939	0.0675339	0.0537624	0.152096	0.0935979	0.102584	0.0597635	0.0788292	0.0821084	0.0886303	0.0695027	0.108319	0.0608341	0.0566796	0.064626	0.107484	0.0811688	0.08262	0.0533681	0.0900433	0.0568281	0.0626438	0.0973906	0.0946256	0.0699818	0.0706019	0.0430907	0.0924862	0.0713688	0.0787034	0.0671782	0.0735057	0.0504997	0.0640478	0.0797731	0.0180689
Otu0000342	0.000785601	0.000979528	0.00105989	0.045673	0	0.00263824	0	0.0649824	0.000960117	0	0.00232159	0.0458108	0.000899685	0	0.048713	0.0019912	0	0.00103998	0	0.0723452	0	0	0.00124832	0.00239665	0.000826863	0.000800448	0.00257635	0	0.000859875	0.00374625	0.0017035	0.0499797	0.000928281	0	0.00205389	0.00111943	0.000801912	0	0	0	0.000973539	0.000881096	0.00368922	0	0.00100693	0	0.00177911	0.00147728	0.0164263
Otu0000343	0.0329953	0.0333039	0.0434557	0.0505916	0.0395491	0.0606796	0.00527593	0.042337	0.0480058	0.0504818	0.0603612	0.0624693	0.0323887	0.000788836	0.0531414	0.0328548	0.00608384	0.044719	0.0499057	0.0518998	0.0651198	0.0450595	0.0499326	0.0311564	0.0429969	0.0400224	0.0506681	0.0593861	0.0386944	0.03996	0.0621779	0.0440499	0.036203	0.0467457	0.0451857	0.0481356	0.0569357	0.0389899	0.0416667	0.0307791	0.0292062	0.0422926	0.0418112	0.0356884	0.0342355	0.0354384	0.000889553	0	0.0435297
Otu0000344	0	0	0	0.000702662	0	0.00263824	0	0	0	0	0	0	0	0	0	0	0	0	0	0	0	0	0	0	0	0.00480269	0	0	0	0	0.00255526	0	0	0	0	0	0.000801912	0	0.00115741	0.00246233	0	0.00176219	0.0061487	0	0.00201386	0.000885959	0	0	0
Otu0000345	0.023568	0.0264473	0.0275573	0.0407544	0.0313097	0.0351766	0.0369315	0.0492291	0.0432053	0.0291673	0.0435297	0.0374816	0.0197931	0.0299758	0.0343205	0.034846	0.0352862	0.0353592	0.0443607	0.028309	0.0262764	0.0320423	0.0249663	0.0251648	0.0339014	0.0208117	0.0231871	0.0331863	0.0335351	0.0418332	0.0434394	0.0389672	0.0213505	0.0293306	0.0328623	0.0391801	0.0320765	0.0279927	0.0347222	0.0246233	0.0272591	0.0202652	0.028284	0.0272911	0.0312148	0.021263	0.0311344	0.0221592	0.0583133
Otu0000346	0.13041	0.0489764	0.0466354	0.0709688	0.096401	0.0545237	0.0928564	0.0886123	0.155539	0.114425	0.0800947	0.0682998	0.102564	0.0638957	0.0808193	0.0806436	0.132628	0.135197	0.0859488	0.0345999	0.107391	0.0891176	0.0848854	0.0910725	0.147182	0.0296166	0.0618323	0.0698659	0.0954461	0.0549451	0.0817682	0.0796286	0.0807604	0.0531617	0.0903713	0.0794797	0.0922199	0.0479875	0.0949074	0.067714	0.0963804	0.0387682	0.119285	0.151151	0.0845819	0.0912538	0.141439	0.11966	0.0106771
Otu0000347	0.0589201	0.0430992	0.0466354	0.0555103	0.0790983	0.0448501	0.0706975	0.0531674	0.0662481	0.0403855	0.0737104	0.044145	0.0584795	0.0796725	0.0653197	0.0487844	0.0584048	0.046799	0.0406639	0.0361726	0.0331311	0.0340449	0.0386978	0.0323547	0.0553998	0.0456256	0.0609735	0.0489062	0.0593314	0.0693057	0.0672884	0.0559095	0.0937564	0.0714934	0.058536	0.0503745	0.0665587	0.0489873	0.0636574	0.0418595	0.0535447	0.0431737	0.0479599	0.0566816	0.0594087	0.0478418	0.0667165	0.0517048	0.0739183
Otu0000348	0.0628481	0.068567	0.0763124	0.0751848	0.0535561	0.0527649	0.0643664	0.0649824	0.0595272	0.08638	0.0568789	0.0807936	0.0701754	0.0473302	0.0542485	0.064714	0.0547545	0.0571987	0.0591475	0.0471817	0.0651198	0.0690912	0.0511809	0.0539245	0.0446506	0.0552309	0.0661262	0.0803458	0.0541721	0.0605644	0.075806	0.089794	0.0538403	0.0522452	0.0831827	0.0761214	0.063351	0.0679823	0.0590278	0.0861814	0.0554917	0.0528658	0.0873115	0.098668	0.0523602	0.0717627	0.0711642	0.0975004	0.013141
Otu0000349	0.0439937	0.0715055	0.0741926	0.0779954	0.0519082	0.097615	0.104463	0.106335	0.0460856	0.0830146	0.0592004	0.0732973	0.0557805	0.0702064	0	0.0677008	0.0535378	0.0592787	0.0674652	0.0676271	0.0571226	0.0851123	0.0836371	0.0802876	0.0454775	0.0824462	0.0755728	0.0908257	0	0.0730519	0.075806	0.0779344	0.0640514	0.0797426	0.0862636	0.0794797	0.045709	0.0929758	0.0659722	0.0923372	0	0.11278	0.0848521	0.0724265	0.0714919	0.104543	0.0898449	0.0679549	0
Otu0000350	0.0573489	0.0577921	0.0508749	0.0358357	0.0477885	0.051006	0.062256	0.0383987	0.0384047	0.0403855	0.0533965	0.0466437	0.0458839	0.0441748	0.0664268	0.0318592	0.0669222	0.0634386	0.0739344	0.0471817	0.0456981	0.0460608	0.0586708	0.0323547	0.0628416	0.0592332	0.0601147	0.0410462	0.0447135	0.0574426	0.0587709	0.0432028	0.0436292	0.0439959	0.0400509	0.041419	0.0433032	0.0399896	0.0648148	0.0357037	0.0389416	0.0484603	0.0553383	0.046185	0.0604157	0.0602452	0.0462568	0.0472729	0.0501002
Otu0000351	0.0172832	0.00391811	0.0105989	0.0161612	0.0107112	0.010553	0.00844149	0.0216608	0.0115214	0.0100964	0.0104471	0.00916216	0.0152946	0.00315535	0.0132854	0.0039824	0.0073006	0.00727984	0.0120143	0.00943634	0.0114245	0.0110145	0.0187247	0.00958658	0.0124029	0.00400224	0.0180344	0.0183398	0.0103185	0.00936563	0.0127763	0.0144009	0.00928281	0.00916582	0.0123234	0.0235081	0.0104249	0.0099974	0.0185185	0.00984931	0.0116825	0.00881096	0.00983792	0.0209932	0.00604157	0.0132894	0.0142328	0.0192046	0.0870594
Otu0000352	0.0934866	0.111666	0.0794921	0.0681582	0.0939292	0.125756	0.0780838	0.0610441	0.08257	0.0953546	0.0835771	0.0674668	0.0818713	0.096238	0.0819264	0.0567492	0.0851737	0.101918	0.100736	0.0550453	0.109675	0.0881163	0.0761472	0.0599161	0.0893012	0.132074	0.100477	0.0803458	0.103185	0.0699301	0.101359	0.0669219	0.101183	0.114573	0.0605899	0.0783603	0.0825969	0.106972	0.0717593	0.0726386	0.0983275	0.122472	0.0787034	0.0608802	0.0986789	0.100113	0.0684956	0.0487502	0
Otu0000353	0.0581345	0.0274268	0.0360364	0.0281065	0.0708589	0.0483678	0.0348211	0.0374141	0.0595272	0.0314109	0.0429493	0.0474767	0.048583	0.0418083	0.0298921	0.0428108	0.0547545	0.0540788	0.0443607	0.0408908	0.0536953	0.0520687	0.0624157	0.0395446	0.0752445	0.0456256	0.0420803	0.0419196	0.0748091	0.0437063	0.0442911	0.0432028	0.0631231	0.0522452	0.0236198	0.0593299	0.05453	0.0519865	0.056713	0.0369349	0.0457563	0.0343627	0.0491896	0.0514333	0.0614226	0.0451839	0.0435881	0.0472729	0.0615986
Otu0000354	0.0479217	0.0342835	0	0.0512943	0.0494364	0.0650767	0.00211037	0	0.00288035	0.00224364	0.0452709	0	0.0368871	0.0575851	0	0.0388284	0	0.0363992	0.00092418	0.0440362	0.0491255	0.0490648	0	0.00119832	0.0438237	0.0520291	0.00171756	0.000873324	0.0472931	0.000624376	0.0613262	0.0618393	0.0454858	0.00274975	0.039024	0.00223886	0.0681625	0.00299922	0.00462963	0.00123116	0.050624	0.0449359	0	0.0346388	0.0523602	0.0389822	0.0364717	0	0.144551
Otu0000355	0.0879874	0.0656284	0.080552	0.0576183	0.100521	0.0545237	0.0664767	0.0472599	0.0835302	0.0628218	0.070228	0.0466437	0.0746739	0.0757283	0.0763908	0.0856216	0.0462371	0.0582387	0.0536025	0.0393181	0.047983	0.0781031	0.0337045	0.033553	0.0802057	0.062435	0.0721377	0.0558928	0.0920066	0.0674326	0.0809165	0.052521	0.125318	0.11274	0.0842097	0.0470162	0.0866065	0.0709815	0.0856481	0.0627893	0.103195	0.0652011	0.0541086	0.0535326	0.0896166	0.0806223	0.0773911	0.0605685	0.0328526
Otu0000356	0.0227824	0.0244882	0.0254375	0.0351331	0.0164788	0.00703532	0.0253245	0.0265837	0.0268833	0.0325327	0.0237963	0.0258206	0.0206928	0.0220874	0.019928	0.0408196	0.0146012	0.0270394	0.0268012	0.0235908	0.0205641	0.0180238	0.0287112	0.0287597	0.0248059	0.0208117	0.0291986	0.0288197	0.0111784	0.0312188	0.0204421	0.0330374	0.0204222	0.0311638	0.0308084	0.0156721	0.0168401	0.0189951	0.0208333	0.0209298	0.0107089	0.0140975	0.0258245	0.0293905	0.0201386	0.0186051	0.0346926	0.0221592	0.0542068
Otu0000357	0.0989858	0.0793418	0.0858515	0.0632396	0.0906334	0.0870621	0.0928564	0.0639978	0.100812	0.0639436	0.0783535	0.0674668	0.105263	0.086772	0.0852477	0.039824	0.0912575	0.088398	0.0748586	0.0676271	0.117673	0.0951256	0.087382	0.0623128	0.0901281	0.0992556	0.094466	0.0803458	0.101465	0.0867882	0.072399	0.0499797	0.0816887	0.0934914	0.0554551	0.0425384	0.101041	0.0889769	0.0775463	0.0714075	0.086645	0.103088	0.0737844	0.0640292	0.0996858	0.08771	0.0738329	0.0546593	0.0238181
Otu0000358	0.0471361	0.0440788	0.0370963	0.043565	0.0436688	0.0527649	0.0464282	0.0492291	0.0499261	0.0415073	0.0522357	0.0291523	0.0395861	0.0465413	0.0398561	0.0338504	0.0584048	0.042639	0.0480574	0.0314545	0.0525528	0.0510674	0.0511809	0.0383463	0.054573	0.0432242	0.0498094	0.0358063	0.0472931	0.0393357	0.0391806	0.0364259	0.0427009	0.0384964	0.0595629	0.0402996	0.0577376	0.0409893	0.0462963	0.0283168	0.036021	0.0396493	0.0516491	0.0272911	0.0443048	0.044298	0.0382508	0.0384093	0.0484576
Otu0000359	0.0581345	0.0509354	0.0508749	0.0470783	0.0650913	0.0685943	0.0485386	0.0344604	0.0604874	0.0471164	0.0574593	0.0374816	0.0602789	0.0370753	0.0343205	0.0517712	0.0511042	0.0301593	0.0452848	0.0235908	0.0445556	0.0570753	0.0337045	0.037148	0.0694565	0.0504282	0.0506681	0.0445395	0.0696499	0.0555694	0.0391806	0.0415085	0.046414	0.0659939	0.0482665	0.0593299	0.0769835	0.0569852	0.0555556	0.0418595	0.0515976	0.0396493	0.0479599	0.0503837	0.0604157	0.0602452	0.0480359	0.0546593	0.0459936
Otu0000360	0.0534209	0.0509354	0.040276	0.0393491	0.0593237	0.051006	0.0379867	0.0502137	0.0643278	0.0527255	0.0522357	0.043312	0.0494827	0.0552185	0.038749	0.054758	0.0608384	0.0592787	0.0582234	0.0408908	0.06055	0.0530701	0.0586708	0.0479329	0.0611879	0.0496278	0.0489506	0.0462862	0.0713696	0.0611888	0.0562157	0.0559095	0.082617	0.0485788	0.0431318	0.0470162	0.0585396	0.0639834	0.0474537	0.0430907	0.0749625	0.0466981	0.0504193	0.0472347	0.0533672	0.0478418	0.0444777	0.0517048	0.0394231
Otu0000361	0.0392801	0.070526	0.0996301	0.089238	0.0568519	0.0738708	0.045373	0.0827048	0.0297636	0.0908673	0.0603612	0.0999509	0.0548808	0.0615292	0.0752837	0.141375	0.0389365	0.0623986	0.0619201	0.116381	0.06055	0.0600793	0.0998652	0.125824	0.0405163	0.0640359	0.0455154	0.0716126	0.0361147	0.0549451	0.0749542	0.0550623	0.046414	0.0577447	0.0749671	0.0447773	0.0216516	0.0569852	0.0486111	0.0701763	0.0408886	0.0572712	0.0676357	0.0640292	0.0473256	0.0708767	0.0507045	0.0694321	0.00903446
Otu0000362	0.0329953	0.0617103	0.0572343	0.0393491	0.0222464	0.0307795	0.0495938	0.0403678	0.0345642	0.0516036	0.0592004	0.0416462	0.0233918	0.0441748	0.038749	0.0467932	0.0328527	0.0478389	0.0378914	0.0267363	0.0274189	0.0470621	0.0411944	0.0311564	0.0429969	0.0416233	0.0575384	0.034933	0.0266561	0.0524476	0.0485499	0.0550623	0.0241353	0.0467457	0.0431318	0.0626882	0.0280669	0.0349909	0.0509259	0.0504777	0.0262856	0.0405304	0.0639465	0.0650789	0.0302078	0.0487278	0.0658269	0.0590912	0.0402444
Otu0000363	0.0573489	0.053874	0.0381562	0.0505916	0.0683871	0.0554031	0.045373	0.0334758	0.048966	0.0459945	0.0429493	0.0399803	0.0602789	0.0465413	0.0376418	0.0378328	0.0462371	0.0530388	0.0314221	0.0314545	0.0639773	0.0470621	0.0362011	0.0395446	0.0429969	0.0432242	0.0515269	0.0401729	0.0429937	0.0524476	0.0502534	0.0516739	0.0556969	0.0430793	0.0462126	0.0313441	0.0328784	0.0579849	0.0439815	0.05294	0.0535447	0.0422926	0.0504193	0.0566816	0.0463187	0.0327805	0.0462568	0.0487502	0.0262821
Otu0000365	0.0432081	0.0636693	0.0657135	0.0801034	0.041197	0.0738708	0.0770286	0.065967	0.0566469	0.0572127	0.07313	0.0724644	0.0377868	0.0670511	0.0442845	0.0567492	0.0559713	0.0603186	0.0600717	0.0408908	0.0594075	0.0670886	0.0524292	0.040743	0.0504387	0.0560314	0.0738552	0.0777259	0.0610511	0.0343407	0.0451429	0.0957238	0.036203	0.0659939	0.0544282	0.0973906	0.0344822	0.0649831	0.0555556	0.0861814	0.0438093	0.0449359	0.0528788	0.0734762	0.0473256	0.0487278	0.0551523	0.0620457	0.00739183
Otu0000366	0.0369233	0.0528945	0.040276	0.0407544	0.0560279	0.0413325	0.0464282	0.0374141	0.0470457	0.0617	0.0406278	0.0374816	0.0494827	0.0496967	0.0442845	0.0587404	0.0377198	0.0509589	0.0434365	0.0629089	0.0571226	0.0500661	0.0411944	0.0395446	0.04217	0.0632354	0.0661262	0.0489062	0.0361147	0.0618132	0.0545122	0.0559095	0.0491989	0.0485788	0.0657246	0.0481356	0.0497185	0.0859776	0.0659722	0.0849503	0.0574388	0.0625578	0.0602573	0.0661285	0.0533672	0.0567014	0.0480359	0.0694321	0.00985578
Otu0000367	0.0298529	0.0264473	0.0317968	0.0295118	0.0263661	0.0246236	0.0274348	0.018707	0.0192023	0.0201927	0.0249571	0.0183243	0.0359874	0.0173544	0.0276778	0.0258856	0.0231186	0.0291193	0.025877	0.00943634	0.0297038	0.0200264	0.0399461	0.0191732	0.0289402	0.0248139	0.0300574	0.0253264	0.0214969	0.0293457	0.0238491	0.0203307	0.0259919	0.0265809	0.0287545	0.0246275	0.0336803	0.0179953	0.0289352	0.0320102	0.0282326	0.0308384	0.0307435	0.0230925	0.027187	0.0283507	0.0302448	0.0310229	0.0451723
Otu0000368	0.0015712	0.000979528	0.0190781	0.000702662	0	0.00175883	0.0221589	0.0285529	0.0297636	0.0280455	0.00116079	0.0299853	0.00179937	0	0.0210352	0.0019912	0.0036503	0.00207995	0.0212561	0	0	0	0.019973	0.0251648	0.000826863	0.00400224	0.0249047	0.0366796	0.00171975	0.0368382	0.000851752	0	0.00185656	0.021998	0.00102695	0.0111943	0.00160382	0.00399896	0.00347222	0.0320102	0.00292062	0.000881096	0.0258245	0.00314898	0.00503464	0.00265788	0.00266866	0.0177274	0.00821315
Otu0000369	0.0329953	0.0548536	0.0529947	0.0555103	0.0444928	0.0545237	0.0601456	0.0669515	0.0451255	0.0560909	0.0539769	0.0716314	0.0413855	0.0560074	0.058677	0.0637184	0.0450204	0.0509589	0.0582234	0.0927906	0.0445556	0.0761005	0.0499326	0.070701	0.0479581	0.062435	0.0541033	0.067246	0.0472931	0.0574426	0.0570674	0.0796286	0.05941	0.0696602	0.0657246	0.0716437	0.0441051	0.0709815	0.0532407	0.0997242	0.0525711	0.0810608	0.0823926	0.0829231	0.0453117	0.0593593	0.0569314	0.0753413	0.015605
Otu0000370	0.0251392	0.0303654	0.0180182	0.0140532	0.0379013	0.0351766	0.0158278	0.0167379	0.0364844	0.0235582	0.0162511	0.0183243	0.0422852	0.0173544	0.019928	0.0139384	0.0170347	0.0249594	0.0212561	0.00943634	0.0331311	0.0220291	0.0174764	0.0191732	0.018191	0.023213	0.0223283	0.0261997	0.0232166	0.0224775	0.0264043	0.015248	0.0334181	0.0265809	0.0287545	0.0179109	0.0280669	0.022994	0.0196759	0.0196986	0.0321268	0.0317195	0.0307435	0.0262415	0.0251732	0.0256928	0.0222388	0.0221592	0.0698118
Otu0000371	0.0015712	0	0.00423958	0.0126479	0	0	0.016883	0.0147687	0.016322	0.0157055	0.000580397	0.0149926	0	0	0.00221423	0	0	0.00207995	0.0175594	0.0110091	0.0159943	0	0	0	0	0.0208117	0	0	0	0	0	0	0.000928281	0.000916582	0.00102695	0.00223886	0	0.00099974	0.0185185	0	0.0175237	0	0.0221353	0.0262415	0	0.00177192	0.000889553	0.00295456	0.0057492
Otu0000372	0.0714897	0.0597512	0.0572343	0.0323224	0.0955771	0.051006	0.0358763	0.0315066	0.0633677	0.0774055	0.0412082	0.0533071	0.102564	0.0512744	0.0520343	0.0487844	0.073006	0.0613586	0.0591475	0.0597635	0.0891113	0.0660872	0.067409	0.033553	0.0818595	0.10726	0.0738552	0.0733592	0.0834079	0.0680569	0.0638814	0.060145	0.082617	0.0760763	0.0616168	0.0705242	0.0970313	0.0909763	0.068287	0.0898749	0.0905391	0.0845852	0.066406	0.0650789	0.0916304	0.0744206	0.0649374	0.0975004	0.00328526
Otu0000373	0.0707041	0.0636693	0.0551145	0.0660502	0.0601476	0.0729914	0.0654215	0.0718744	0.0758492	0.0650655	0.0795143	0.0841253	0.0854701	0.0591627	0.058677	0.0637184	0.0644887	0.0623986	0.0683893	0.0644816	0.0559802	0.0640846	0.0624157	0.0587178	0.0587073	0.0600336	0.0644086	0.0724859	0.0722295	0.0643107	0.0621779	0.0694633	0.036203	0.061411	0.0801019	0.0682854	0.0585396	0.0659828	0.0752315	0.045553	0.0477034	0.0652011	0.0577978	0.0650789	0.0503464	0.0602452	0.049815	0.0502275	0.00246394
Otu0000374	0.0699185	0.0783622	0.0487552	0.0808061	0.042021	0.0580414	0.0696423	0.0777819	0.0595272	0.0482382	0.0917027	0.098285	0.0494827	0.0536409	0.0719624	0.0537624	0.0498874	0.0665585	0.0646926	0.073918	0.0525528	0.0710938	0.0798921	0.070701	0.0463043	0.0568318	0.0798667	0.0785992	0.0601912	0.0867882	0.0664367	0.0711575	0.0473423	0.0742431	0.0677785	0.0817186	0.0641529	0.0639834	0.0636574	0.0504777	0.0369945	0.0431737	0.061487	0.0713768	0.0624295	0.0469558	0.0711642	0.0502275	0.00328526
Otu0000375	0.0251392	0.0362425	0.029677	0.0274038	0.0164788	0.0219854	0.0306004	0.0255991	0.0278434	0.0336545	0.00348238	0.0283194	0.0422852	0.0268204	0.0121782	0.02489	0.0231186	0.0405591	0.0221803	0.0157272	0.0388434	0.0090119	0.0212214	0.0167765	0.0148835	0.00480269	0.0300574	0.00261997	0.0146179	0.0237263	0.0204421	0.0220249	0.0185656	0.0256643	0.00718863	0.0190303	0.0264631	0.0149961	0.0127315	0.0160051	0.0223914	0.0202652	0.0319732	0.0125959	0.0120831	0.0363243	0.025797	0.0132955	0.0739183
Otu0000376	0.0353521	0.0284063	0.0466354	0.0386464	0.02719	0.0158295	0.0327108	0.0255991	0.0355243	0.0325327	0.0417886	0.0274865	0.0296896	0.0354976	0.0254636	0.0189164	0.0194683	0.0280794	0.0194078	0.0251636	0.0377009	0.031041	0.0149798	0.0359497	0.0297671	0.0296166	0.0334925	0.032313	0.0232166	0.0430819	0.0459946	0.0220249	0.0324898	0.0403296	0.0431318	0.0324635	0.0320765	0.0209945	0.0451389	0.0209298	0.025312	0.0193841	0.0270543	0.0314898	0.0251732	0.043412	0.0320239	0.0531821	0.0459936
Otu0000377	0.0714897	0.0499559	0.0582942	0.045673	0.0601476	0.0483678	0.0506489	0.0620286	0.0700885	0.0572127	0.070228	0.0574717	0.0575798	0.0631069	0.058677	0.0716832	0.0462371	0.0582387	0.0711619	0.0393181	0.070832	0.0630833	0.0811405	0.0563212	0.0711102	0.0600336	0.0618323	0.0654993	0.0472931	0.0668082	0.0630297	0.0567566	0.0566251	0.0421628	0.0441587	0.0537327	0.063351	0.0549857	0.0625	0.0406284	0.0769096	0.0502225	0.0602573	0.0671782	0.055381	0.0629031	0.0720538	0.0723867	0.0205329
Otu0000378	0.0636337	0.0470173	0.0657135	0.0576183	0.0634434	0.0501266	0.0569801	0.0669515	0.0643278	0.0583345	0.0562985	0.0474767	0.0620783	0.0654734	0.0564628	0.0408196	0.0584048	0.0561587	0.0489816	0.0550453	0.0582651	0.059078	0.0686573	0.0611144	0.0653222	0.0440247	0.0704201	0.0654993	0.0653505	0.0568182	0.0494016	0.0609921	0.0733342	0.07241	0.0718863	0.0537327	0.0737759	0.0629836	0.0902778	0.0541712	0.0798302	0.0590334	0.056568	0.0598306	0.0584018	0.0584733	0.0693851	0.0856822	0.00328526
Otu0000379	0.096629	0.0959937	0.0657135	0.0632396	0.0848659	0.0879415	0.0728079	0.0649824	0.0806498	0.0964764	0.0597808	0.0732973	0.11426	0.0749395	0.058677	0.0726788	0.00121677	0.0686385	0.0517541	0.073918	0.119958	0.0750991	0.0574225	0.0623128	0.0942624	0.0984551	0.0687026	0.0611327	0.0834079	0.0649351	0.0672884	0.0703104	0.0872584	0.0687436	0.0759941	0.0582105	0.0890122	0.101973	0.0590278	0.0886438	0.0983275	0.127759	0.0811628	0.0545823	0.10472	0.064675	0.0649374	0.0561366	0.015605
Otu0000380	0.0384945	0.0382016	0.0370963	0.0231878	0.0288379	0.0404531	0.0263797	0.0275683	0.032644	0.0258018	0.0383062	0.0366486	0.0287899	0.03392	0.0376418	0.0219032	0.073006	0.0301593	0.0480574	0.0251636	0.0422707	0.0390515	0.0249663	0.0191732	0.0289402	0.0496278	0.0334925	0.0331863	0.0283759	0.0237263	0.0340701	0.029649	0.0408444	0.0467457	0.0256737	0.0246275	0.0216516	0.0399896	0.03125	0.0406284	0.036021	0.0414115	0.0479599	0.0272911	0.0241663	0.0336665	0.033803	0.0280683	0.0550281
Otu0000381	0.0856306	0.0734646	0.0710129	0.0505916	0.0799222	0.0703532	0.0728079	0.00295374	0.0633677	0.0717964	0.00116079	0.0583047	0.0818713	0.0796725	0.058677	0.0637184	0.073006	0.0655185	0.0600717	0.0896452	0.0788292	0.0761005	0.0748989	0.0754943	0.0752445	0.100056	0.0790079	0.064626	0.0679301	0.0649351	0.068992	0.0753931	0.065908	0.106323	0.0924252	0.0761214	0.0705682	0.0919761	0.0960648	0.0984931	0.000973539	0.0801797	0.09469	0.100767	0.0825681	0.0947976	0.0880658	0.0886368	0.000821315
Otu0000382	0.0361377	0.0430992	0.0572343	0.0653475	0.0395491	0.0492472	0.0569801	0.0600595	0.0297636	0.0628218	0.0638436	0.0949533	0.0413855	0.0560074	0.068641	0.0766612	0.0279856	0.0499189	0.0545266	0.0644816	0.0445556	0.0570753	0.0549258	0.0551228	0.036382	0.0488273	0.0515269	0.0768525	0.0455734	0.044955	0.0621779	0.0762402	0.0306333	0.0458291	0.0492935	0.075002	0.027265	0.0569852	0.0752315	0.0923372	0.0321268	0.0563901	0.0639465	0.0755755	0.028194	0.0513856	0.0658269	0.0753413	0.00410657
Otu0000383	0.011784	0.0176315	0.0180182	0.00140532	0.0115352	0.021106	0.00105519	0.00196916	0.000960117	0.00112182	0.0226355	0.000832924	0.0260909	0.0173544	0.0177138	0.034846	0.0109509	0.0103998	0.00184836	0	0.0022849	0.0240317	0.019973	0.0167765	0.00992236	0.0016009	0.0180344	0.00960657	0.0128981	0.0206044	0.0127763	0.0144009	0.023207	0.0164985	0.0205389	0.0145526	0.0128306	0.0139964	0.00231482	0.014774	0.000973539	0.0140975	0.00122974	0.00104966	0.0120831	0.0168332	0.025797	0.0162501	0.147015
Otu0000384	0.0518497	0.0597512	0.040276	0.0421597	0.0535561	0.0536443	0.00105519	0.054152	0.0470457	0.0538473	0.067326	0.0424791	0.0530814	0.0591627	0.0553557	0.0527668	0.0559713	0.0644786	0.0471332	0.0471817	0.0594075	0.0650859	0.0524292	0.0383463	0.054573	0.0552309	0.0523857	0.0611327	0.0627709	0.0549451	0.0545122	0.052521	0.00185656	0.0439959	0.0564821	0.0559716	0.000801912	0.0599844	0.0648148	0.00369349	0.0525711	0.0528658	0.066406	0.0556319	0.069478	0.0602452	0.0453672	0.0487502	0.0558494
Otu0000385	0.0714897	0.0617103	0.0445156	0.0231878	0.0626195	0.0589208	0.0369315	0.0206762	0.0854504	0.0617	0.0423689	0.0316511	0.0944669	0.00157767	0.0509272	0.039824	0.0377198	0.045759	0.0240287	0.0440362	0.0674047	0.0370489	0.0162281	0.00718993	0.060361	0.0720403	0.0583972	0.0401729	0.0567517	0.0462038	0.0502534	0.044897	0.0519837	0.0531617	0.0308084	0.0391801	0.0593415	0.0449883	0.0532407	0.0590958	0.086645	0.0801797	0.0787034	0.0566816	0.069478	0.0478418	0.0569314	0.0768185	0.0344952
Otu0000386	0.092701	0.0861985	0.0869114	0.0653475	0.0865137	0.0782679	0.0770286	0.0669515	0.0777695	0.100964	0.0621024	0.0641351	0.0989654	0.0749395	0.0664268	0.0686964	0.0742228	0.0831981	0.0776311	0.056618	0.0856839	0.0690912	0.0561742	0.070701	0.0876475	0.0808453	0.0781492	0.0698659	0.0851276	0.0755495	0.0911375	0.0618393	0.103039	0.0852421	0.0605899	0.0559716	0.0850026	0.105972	0.0648148	0.0763321	0.0885921	0.0969206	0.0762439	0.0608802	0.0996858	0.0850521	0.0711642	0.0590912	0.00821315
Otu0000387	0.0597057	0.0626898	0.0741926	0.0737795	0.0568519	0.0712326	0.0706975	0.0620286	0.048966	0.0706745	0.0824163	0.0707985	0.0431849	0.0599516	0.0498201	0.0308636	0.0498874	0.0561587	0.0609959	0.0754907	0.0468405	0.0550727	0.0711539	0.0479329	0.0446506	0.0680381	0.0772904	0.0742326	0.0576116	0.0611888	0.075806	0.0779344	0.0584817	0.0678271	0.0729132	0.0839574	0.0441051	0.072981	0.0543981	0.0701763	0.0438093	0.0572712	0.0725547	0.0409367	0.0493395	0.0567014	0.0409194	0.0561366	0.00903446
Otu0000388	0.0243536	0.0205701	0.00953905	0.0358357	0.0263661	0.0114324	0.0189934	0.0285529	0.0307237	0.0157055	0.030761	0.0299853	0.0125956	0.0197209	0.0254636	0.0179208	0.0292024	0.0343192	0.0351189	0.0188727	0.0262764	0.0390515	0.0312079	0.0275614	0.0248059	0.0120067	0.019752	0.0209598	0.0197771	0.0324675	0.0289596	0.0177894	0.029705	0.0293306	0.0369701	0.0302247	0.0433032	0.0199948	0.0300926	0.0184674	0.037968	0.0176219	0.028284	0.0283408	0.0302078	0.0310086	0.0462568	0.0206819	0.044351
Otu0000389	0.00314241	0.0215496	0.0233177	0.0147559	0.00164788	0.0650767	0.0348211	0.0511982	0.00384047	0.0538473	0.0342434	0.0349828	0.00269906	0.0544297	0.0464988	0.059736	0.00121677	0.044719	0.0341947	0.0393181	0.00114245	0.0290383	0.0212214	0.0383463	0.00330745	0.0480269	0.0403627	0.0253264	0.0034395	0.0387113	0.0289596	0.0491326	0.00185656	0.0293306	0.0400509	0.0458967	0.00240573	0.0609841	0.037037	0.0381661	0.00389416	0.0502225	0.0270543	0.0335891	0	0.0460699	0.0364717	0.0295456	0.000821315
Otu0000390	0.0738465	0.0881575	0.0879713	0.00281065	0.069211	0.0650767	0.0928564	0.0876277	0.0710486	0.0605782	0.0853183	0.0483096	0.0611786	0.0615292	0.0608912	0.0617272	0.0644887	0.0707184	0.103508	0.0802089	0.0788292	0.0640846	0.0836371	0.0766926	0.0934355	0.0632354	0.0712789	0.0829658	0.089427	0.0861638	0.099655	0.0762402	0.0983978	0.0916582	0.0657246	0.0805991	0.0890122	0.0779797	0.0763889	0.0517089	0.0934598	0.0563901	0.0873115	0.0650789	0.0775334	0.0717627	0.0942926	0.0664776	0.0418871
Otu0000391	0.119411	0.0666079	0.0794921	0.0421597	0.10464	0.0800267	0.0517041	0.0413524	0.0873706	0.0717964	0.0493337	0.0383145	0.136752	0.0638957	0.0564628	0.034846	0.0644887	0.045759	0.0295738	0.0235908	0.0776868	0.0510674	0.043691	0.0227681	0.0810326	0.0808453	0.0824431	0.0637527	0.0748091	0.0649351	0.0553639	0.0533681	0.112322	0.0889084	0.0698324	0.0514939	0.0882103	0.07698	0.0856481	0.0886438	0.0963804	0.0748932	0.0627167	0.0734762	0.0916304	0.0832802	0.0693851	0.0886368	0.0114984
Otu0000392	0	0	0	0	0.00164788	0	0	0	0	0	0	0	0	0	0	0	0	0	0	0	0.0022849	0	0	0	0	0	0	0	0	0	0	0	0	0	0	0	0	0	0	0	0	0	0	0	0	0	0	0	0
Otu0000393	0	0.0303654	0.367783	0.313387	0.00082394	0.0659561	0.263797	0.149656	0	0.0392636	0.226935	0.46727	0	0.190898	0.156103	0.154318	0	0.0332793	0.335477	0.226472	0.00114245	0.0430568	0.399461	0.224086	0	0	0	0	0	0	0	0	0.000928281	0	0	0	0	0.00399896	0	0	0	0	0	0	0	0	0	0	0.00164263
Otu0000394	0.0306385	0.0313449	0.0423958	0.0323224	0.0247182	0.0316589	0.0411523	0.0315066	0.0345642	0.0471164	0.0319218	0.0349828	0.0503824	0.0252428	0.0398561	0.0288724	0.0109509	0.0363992	0.0332705	0.0330272	0.0205641	0.0240317	0.0262146	0.0179748	0.0372088	0.0280157	0.0386452	0.0427929	0.0180574	0.0318432	0.0476981	0.0465912	0.0111394	0.0421628	0.0246467	0.0425384	0.0312746	0.022994	0.03125	0.0295479	0.0155766	0.0246707	0.0393517	0.0304401	0.0221524	0.0265788	0.0435881	0.0398865	0.0386018
Otu0000395	0.00549921	0.00293858	0.00847916	0.0210799	0.00247182	0.00351766	0.00844149	0.0137841	0	0.00560909	0.00928634	0.0174914	0.000899685	0.00315535	0.00110711	0.0059736	0.00243353	0.00519988	0	0	0.0022849	0.00600793	0.00374494	0	0.00165373	0.00560314	0.0103054	0.00611327	0.00257962	0.00874126	0.00681402	0.00762402	0	0	0.018485	0.00783603	0.00320765	0.00399896	0.00462963	0	0.00194708	0.00440548	0.00245948	0	0.00402771	0.000885959	0	0.00147728	0.0969151
Otu0000396	0.0353521	0.0342835	0.0487552	0.0217825	0.0337816	0.025503	0.0274348	0.030522	0.041285	0.0190709	0.0388866	0.0358157	0.0503824	0.0323423	0.0243565	0.0338504	0.0352862	0.0291193	0.0295738	0.0393181	0.0297038	0.0240317	0.0374494	0.0167765	0.0479581	0.0344193	0.0334925	0.0305664	0.034395	0.024975	0.0298113	0.0330374	0.000928281	0.028414	0.0205389	0.0212692	0.0152363	0.0289925	0.0266204	0.0270856	0.0321268	0.0290762	0.0344327	0.00314898	0.0302078	0.0345524	0.0302448	0.026591	0.0698118
Otu0000397	0.0620625	0.0421197	0.060414	0.0449703	0.0477885	0.0430913	0.0495938	0.0403678	0.0460856	0.0538473	0.0377258	0.054973	0.0575798	0.0402307	0.0509272	0.0408196	0.0352862	0.0478389	0.0425123	0.0408908	0.0502679	0.056074	0.0424427	0.0263631	0.0553998	0.0488273	0.0515269	0.0462862	0.0533122	0.0605644	0.0476981	0.0482854	0.0649797	0.0412462	0.0492935	0.0436579	0.0513224	0.0619839	0.0555556	0.0578647	0.0515976	0.0431737	0.0467301	0.049334	0.0684711	0.0584733	0.041809	0.0590912	0.0180689
Otu0000398	0.000785601	0.00293858	0.0158984	0.00140532	0.00164788	0.000879415	0.0200485	0.0216608	0.0153619	0.0145836	0.000580397	0.0166585	0.00269906	0	0.0287849	0	0.0486707	0	0.0138627	0.00471817	0	0.00300396	0.0212214	0.0203715	0	0.000800448	0.0154581	0.0148465	0.000859875	0.0193556	0.000851752	0	0	0.0256643	0	0.0615688	0.000801912	0.0469878	0.03125	0.0221609	0	0.00264329	0.0196758	0.00209932	0.00201386	0	0.00177911	0.0162501	0.00410657
Otu0000399	0.00942722	0.0225291	0.0158984	0.0231878	0.0156549	0.0175883	0.0126622	0.011815	0.0105613	0.0157055	0.0145099	0.0274865	0.0206928	0.0110437	0.0143925	0.0209076	0.0121677	0.0187196	0.0184836	0.0267363	0.00799717	0.0230304	0.0187247	0.00838826	0.0107492	0.0200112	0.019752	0.0305664	0.00773887	0.0143606	0.0204421	0.0228721	0.0111394	0.010999	0.0174581	0.0190303	0.00721721	0.022994	0.0104167	0.0246233	0.00194708	0.0281951	0.0147569	0.0178442	0.0161108	0.0132894	0.0133433	0.0132955	0.0238181
Otu0000400	0.0392801	0.0235087	0.0286172	0.0281065	0.0379013	0.0413325	0.0306004	0.0246145	0.0499261	0.0336545	0.0290198	0.0208231	0.0413855	0.0378641	0.0265707	0.019912	0.0352862	0.0301593	0.0249529	0.0377453	0.0514104	0.0290383	0.0274629	0.0251648	0.0372088	0.0264148	0.0386452	0.0331863	0.0404141	0.0280969	0.0357736	0.037273	0.0371312	0.0357467	0.0359431	0.0425384	0.063351	0.0319917	0.0347222	0.0590958	0.0340739	0.0396493	0.0295138	0.0451354	0.0483325	0.0363243	0.0346926	0.0487502	0.0123197
Otu0000401	0.0502785	0.0382016	0.0254375	0.0168639	0.0477885	0.0342972	0.0316556	0.0167379	0.032644	0.0325327	0.0325022	0.0149926	0.0440846	0.0315535	0.0276778	0.0308636	0.052321	0.0332793	0.0231045	0.0471817	0.0525528	0.0460608	0.0299596	0.0275614	0.0479581	0.0480269	0.0334925	0.0261997	0.0490129	0.0262238	0.0315148	0.0245663	0.0417726	0.0403296	0.037997	0.0190303	0.0264631	0.045988	0.0381944	0.0480154	0.0642536	0.0440548	0.0528788	0.0251918	0.0573949	0.0416401	0.0311344	0.0325001	0.0689904
Otu0000402	0.0534209	0.0421197	0.0286172	0.0590236	0.055204	0.0369354	0.0263797	0.0413524	0.0537665	0.0347764	0.0522357	0.0524742	0.0395861	0.0370753	0.038749	0.0308636	0.0328527	0.0561587	0.0508299	0.0345999	0.0468405	0.0410542	0.047436	0.0467346	0.0429969	0.0336188	0.0352101	0.0419196	0.041274	0.0355894	0.0442911	0.0482854	0.0612665	0.0375799	0.0482665	0.0559716	0.0617472	0.0399896	0.0358796	0.0357037	0.0399151	0.0387682	0.0467301	0.0472347	0.0453117	0.0345524	0.057821	0.0354547	0.0271034
Otu0000403	0.0298529	0.0470173	0.0360364	0.0309171	0.0428449	0.0316589	0.0580352	0.0393833	0.0278434	0.0415073	0.0400474	0.0424791	0.0332883	0.0323423	0.0398561	0.034846	0.0328527	0.0343192	0.0452848	0.028309	0.0377009	0.0460608	0.0386978	0.0299581	0.0438237	0.0280157	0.0429391	0.0366796	0.0404141	0.0437063	0.0451429	0.0364259	0.0352747	0.0302472	0.0421048	0.0402996	0.0400956	0.0429888	0.0474537	0.0270856	0.0321268	0.0255518	0.0541086	0.0241422	0.042291	0.0363243	0.0382508	0.0428411	0.0418871
Otu0000404	0.0125696	0.0195906	0.00953905	0.0105399	0.0123591	0.01495	0.0147726	0.0127996	0.0153619	0.0280455	0.0139295	0.0141597	0.0125956	0.0157767	0.00885691	0.014934	0.0109509	0.0176796	0.0184836	0.0110091	0.012567	0.0230304	0.0137315	0.0179748	0.0165373	0.0136076	0.0103054	0.0174665	0.00859875	0.0174825	0.0127763	0.0144009	0.0139242	0.0201648	0.0164312	0.0190303	0.0136325	0.00599844	0.0208333	0.0184674	0.00973539	0.0123353	0.0209056	0.0251918	0.00805542	0.0177192	0.0142328	0.0132955	0.0648839
Otu0000405	0.00942722	0.0127339	0.00741926	0.0140532	0.0082394	0.0123118	0.0253245	0.00984582	0.0268833	0.00336545	0.0179923	0.0149926	0.0161943	0.0141991	0.00664268	0.0059736	0.0133844	0.0145597	0.0157111	0.00786361	0.0159943	0.0130172	0.0112348	0.0143799	0.0297671	0.0136076	0.0128817	0.00873324	0.00859875	0.0174825	0.00596227	0.0169423	0.0139242	0.0210814	0.0133503	0.0167915	0.0112268	0.00799792	0.00694444	0.00861814	0.0155766	0.00969206	0.028284	0.0146952	0.0110762	0.0132894	0.00711643	0.0177274	0.075561
Otu0000406	0.0463505	0.0568126	0.0635937	0.0611316	0.055204	0.0765091	0.0706975	0.0551366	0.0460856	0.04936	0.061522	0.044145	0.0512821	0.0567962	0.0553557	0.0268812	0.073006	0.0519988	0.0850246	0.0393181	0.0525528	0.0550727	0.043691	0.0503295	0.0330745	0.069639	0.0661262	0.0611327	0.0593314	0.0493257	0.0587709	0.0474383	0.0380595	0.0531617	0.0544282	0.049255	0.0473128	0.0519865	0.0671296	0.0689451	0.050624	0.0511036	0.0627167	0.0419864	0.0372563	0.0460699	0.0355821	0.036932	0.0139624
Otu0000407	0.00549921	0.0127339	0.0190781	0.0267011	0.00494364	0.0202265	0.0232141	0.0295374	0.0057607	0.0190709	0.0208943	0.0224889	0.00809717	0.0189321	0.0154996	0.0268812	0.0036503	0.0176796	0.020332	0.0188727	0.00571226	0.0180238	0.0149798	0.0191732	0.00413432	0.023213	0.027481	0.0314397	0.00859875	0.0174825	0.0247008	0.0203307	0.00928281	0.0293306	0.0246467	0.0279858	0.00400956	0.0129966	0.0208333	0.0357037	0.00681477	0.0220274	0.0172164	0.0241422	0.00704849	0.022149	0.0186806	0.036932	0.0106771
Otu0000408	0.0447793	0.0372221	0.0307369	0.0302145	0.0535561	0.0325383	0.0263797	0.0334758	0.0432053	0.0314109	0.0487533	0.0299853	0.0359874	0.0418083	0.0520343	0.0258856	0.0815234	0.043679	0.0508299	0.0377453	0.0525528	0.0460608	0.0461876	0.0323547	0.0496118	0.030417	0.0343513	0.0410462	0.0541721	0.0568182	0.0425876	0.0355787	0.0556969	0.0412462	0.0400509	0.0436579	0.0593415	0.0449883	0.037037	0.0393972	0.0496505	0.037006	0.0455004	0.0293905	0.041284	0.0327805	0.0426985	0.0251138	0.0484576
Otu0000409	0.0581345	0.0764032	0.0529947	0.089238	0.0667392	0.0589208	0.062256	0.0856586	0.0633677	0.0516036	0.0888007	0.0882899	0.0638776	0.0709953	0.0608912	0.0736744	0.0584048	0.0759183	0.0988873	0.0676271	0.0754019	0.0771018	0.117342	0.0886759	0.0644953	0.0472264	0.0652674	0.0838391	0.0576116	0.0792957	0.0570674	0.0703104	0.0556969	0.0586612	0.0646977	0.0940323	0.0368879	0.0599844	0.0671296	0.0504777	0.0652271	0.0511036	0.0676357	0.0850224	0.0463187	0.0478418	0.0738329	0.0590912	0.0164263
Otu0000410	0.0432081	0.000979528	0.0381562	0.0562129	0.00082394	0.0554031	0.0411523	0.065967	0.0748891	0.0504818	0.0516553	0.0483096	0.0431849	0.0623181	0.058677	0.0507756	0.00121677	0.0696784	0.056375	0.0597635	0.0502679	0.0510674	0.0786438	0.070701	0.0438237	0.0520291	0.054962	0.0585127	0.0455734	0.0493257	0.0502534	0.044897	0.052912	0.0549949	0.0462126	0.0358218	0.0593415	0.0469878	0.0451389	0.0406284	0.0700948	0.0599145	0.0528788	0.0440857	0.0463187	0.0593593	0.0533732	0.0398865	0.044351
Otu0000411	0.0424225	0.0264473	0.0264974	0.0337278	0.0486125	0.0290207	0.0369315	0.042337	0.032644	0.0437509	0.0400474	0.032484	0.0467836	0.0347088	0.0343205	0.0288724	0.0316359	0.0311993	0.0388156	0.0440362	0.0594075	0.0450595	0.0386978	0.040743	0.036382	0.0224126	0.0412215	0.0392996	0.0429937	0.0324675	0.0247008	0.044897	0.0371312	0.0430793	0.0492935	0.0481356	0.0505204	0.0469878	0.0347222	0.05294	0.0389416	0.0343627	0.0319732	0.043036	0.042291	0.0345524	0.0320239	0.0384093	0.0229968
Otu0000412	0.0597057	0.0528945	0.049815	0.0562129	0.0469646	0.051006	0.0675319	0.0590749	0.0470457	0.0471164	0.0783535	0.0499754	0.0467836	0.0544297	0.0498201	0.0786524	0.0474539	0.0603186	0.0730102	0.0330272	0.0502679	0.0710938	0.0848854	0.0575195	0.0463043	0.05363	0.0790079	0.0663726	0.0515925	0.0605644	0.0621779	0.0550623	0.0556969	0.0559115	0.0729132	0.0526133	0.045709	0.0549857	0.0509259	0.0689451	0.048677	0.0607956	0.0836223	0.0671782	0.0443048	0.0567014	0.0871762	0.0723867	0.00821315
Otu0000413	0.015712	0.0460378	0.0254375	0.0351331	0.0214225	0.0290207	0.016883	0.018707	0.0201625	0.0224364	0.0330826	0.0274865	0.0251912	0.0173544	0.0121782	0.0268812	0.00973414	0.0239195	0.020332	0.0173	0.0297038	0.0220291	0.0249663	0.0191732	0.0132298	0.039222	0.0352101	0.0375529	0.0292357	0.0268482	0.0238491	0.0237192	0.0241353	0.0229145	0.0338893	0.0201498	0.0160382	0.0209945	0.0185185	0.0196986	0.012656	0.0132164	0.0172164	0.0272911	0.0171178	0.022149	0.0355821	0.0443184	0.0435297
Otu0000414	0.0667761	0.0558331	0.0678333	0.00210799	0.0650913	0.0536443	0.0348211	0.000984581	0.000960117	0.00336545	0.0423689	0.00166585	0.082771	0.00315535	0.0719624	0.0029868	0.0632719	0.0488789	0.0452848	0.00629089	0.0674047	0.0620819	0.0699056	0.0718993	0.0628416	0.000800448	0.0644086	0.0541461	0.00257962	0.0574426	0.0494016	0.00338845	0	0.061411	0.0503204	0	0.0657568	0.0889769	0.0648148	0.10588	0.0720419	0.0775365	0.0713249	0.0902707	0.0614226	0.0823942	0.0720538	0.00443184	0.0139624
Otu0000415	0.0644193	0.0783622	0.00105989	0.129992	0.0568519	0.00263824	0.00422074	0.112242	0.0585671	0.0583345	0.0864791	0.120774	0.0557805	0.0836167	0.0619983	0.100556	0.00121677	0.0623986	0.0979631	0.0754907	0.0582651	0.0831097	0.0861337	0.0659077	0.0628416	0.0752421	0.0798667	0.00174665	0.00171975	0.0849151	0.0741025	0.0779344	0.0501272	0.0815758	0.096533	0.0996295	0.0617472	0.00099974	0.0810185	0.0615582	0.00194708	0.0466981	0.061487	0.0787245	0.00100693	0.00354384	0.0747225	0.0517048	0.00492789
Otu0000416	0.01964	0.0479969	0.0349765	0.041457	0.0444928	0.0483678	0.02849	0.0383987	0.032644	0.0358982	0.000580397	0.0266536	0.0188934	0.0362865	0.0332134	0	0.0243353	0.0228795	0.0304979	0.0393181	0.022849	0.025033	0.0249663	0.0383463	0.0305939	0.0432242	0.0334925	0.0340596	0.027516	0.0305944	0.0340701	0.0432028	0.000928281	0.0421628	0.0174581	0.0369413	0.0408975	0.0399896	0.0289352	0.0283168	0.0350474	0.0440548	0.00122974	0.0367381	0.0342355	0.0380963	0.0320239	0.0251138	0.0476363
Otu0000417	0.0369233	0.0313449	0.0328567	0.0512943	0.0296619	0.0369354	0.0306004	0.0462753	0.0307237	0.0403855	0.0301806	0.0266536	0.0242915	0.0323423	0.0321063	0.0368372	0.0413701	0.0249594	0.0378914	0.0298817	0.0319887	0.0470621	0.0374494	0.040743	0.0281133	0.0240134	0.0463742	0.0375529	0.0421339	0.0343407	0.0298113	0.0440499	0.0427009	0.0339135	0.0297815	0.041419	0.0288688	0.0289925	0.0439815	0.0443219	0.0408886	0.0422926	0.056568	0.0346388	0.0523602	0.0363243	0.033803	0.0443184	0.0172476
Otu0000418	0.0502785	0.0793418	0.0731327	0.102589	0.0642674	0.0633179	0.119236	0.0620286	0.0681683	0.0572127	0.106793	0.0732973	0.0332883	0.0733618	0.0719624	0.0487844	0.119243	0.0779983	0.082252	0.0676271	0.0582651	0.0650859	0.0649124	0.0431396	0.0413432	0.0288161	0.0661262	0.0602594	0.0730894	0.0705544	0.0494016	0.0440499	0.0324898	0.0577447	0.0667516	0.0626882	0.0441051	0.0439886	0.0601852	0.0246233	0.0331003	0.0361249	0.0491896	0.043036	0.041284	0.0354384	0.0604896	0.0413638	0.0238181
Otu0000419	0.00392801	0.182192	0.00211979	0.181989	0.00988729	0.200507	0.00633112	0.180178	0.00192023	0.00336545	0.00522357	0.00249877	0.00269906	0.00473302	0.00664268	0.004978	0.173998	0.186156	0.00554508	0.149409	0.0137094	0.179237	0.00249663	0.00958658	0.00330745	0.00640359	0.172615	0.176412	0.00515925	0.00374625	0.203569	0.00169423	0.00742625	0.17965	0.00410779	0.204856	0.00320765	0.0159958	0.0104167	0.00492465	0.0048677	0.197366	0.170934	0.0052483	0.00604157	0.171876	0.177911	0.146251	0.0114984
Otu0000420	0.0243536	0.0205701	0.0264974	0.0344304	0.0238943	0.0219854	0.0348211	0.0324912	0.0297636	0.0201927	0.0220551	0.0233219	0.0134953	0.0228763	0.0309992	0.0209076	0.0109509	0.0218395	0.0147869	0.0188727	0.0182792	0.0210278	0.0299596	0.0179748	0.0148835	0.0224126	0.0223283	0.0288197	0.0240765	0.0262238	0.0315148	0.0144009	0.0176373	0.0164985	0.0256737	0.0201498	0.0232554	0.0169956	0.0266204	0.0196986	0.00778831	0.0299573	0.0258245	0.0167945	0.0181247	0.0230349	0.0275761	0.0177274	0.0418871
Otu0000421	0.0149264	0.0215496	0.0127187	0.0245932	0.0205985	0.0175883	0.016883	0.0167379	0.0192023	0.0213145	0.0133491	0.0199902	0.0116959	0.0126214	0.00996402	0.0169252	0.0133844	0.0114397	0.0138627	0.00629089	0.0205641	0.0190251	0.0224697	0.0203715	0.0190179	0.016009	0.0128817	0.0165932	0.0163376	0.0224775	0.0178868	0.0237192	0.0241353	0.0183316	0.0287545	0.0223886	0.0216516	0.0129966	0.0127315	0.0258544	0.0292062	0.0193841	0.028284	0.0188939	0.0171178	0.0115175	0.016012	0.0221592	0.0525641
Otu0000422	0.00942722	0.0137134	0.00847916	0.00632396	0.00988729	0.00967356	0.0147726	0.00590749	0.0105613	0.0145836	0.00986674	0.00749631	0.00899685	0.00709953	0.00996402	0.0079648	0.00851737	0.0103998	0.00739344	0.0110091	0.0148519	0.0130172	0.00249663	0.00958658	0.00826863	0.00640359	0.00687025	0.00523995	0.0103185	0.00874126	0.0161833	0.00847113	0.00835453	0.00458291	0.00718863	0.00783603	0.0104249	0.0099974	0.00925926	0.00123116	0.00584124	0.0105732	0	0.00629796	0.0100693	0.00797363	0.00622687	0.00147728	0.0722757
Otu0000423	0.011784	0.0235087	0.0169583	0.0274038	0.0197746	0.0158295	0.0242693	0.018707	0.0124815	0.0134618	0.0330826	0.0208231	0.0125956	0.0181432	0.019928	0.0159296	0.0073006	0.0239195	0.0231045	0.0157272	0.0217066	0.0210278	0.019973	0.0107849	0.0231522	0.0144081	0.0214695	0.0174665	0.0146179	0.0212288	0.0195903	0.0169423	0.00649797	0.0174151	0.0205389	0.0156721	0.0208497	0.0189951	0.0324074	0.014774	0.00681477	0.0123353	0.0147569	0.0115463	0.0120831	0.0203771	0.0177911	0.010341	0.0410657
Otu0000424	0.0455649	0.0430992	0.029677	0.0449703	0.0543801	0.051006	0.0390419	0.0590749	0.0720088	0.0336545	0.0539769	0.0516413	0.0278902	0.0536409	0.0697481	0.029868	0.0571881	0.0530388	0.0489816	0.0487544	0.0411283	0.0550727	0.0536775	0.0587178	0.0479581	0.0480269	0.0343513	0.0497795	0.0515925	0.0499501	0.0511051	0.0660748	0.0454858	0.0403296	0.0595629	0.0514939	0.0657568	0.0529862	0.0648148	0.0689451	0.0642536	0.0599145	0.0504193	0.0398871	0.0573949	0.042526	0.0560418	0.0428411	0.0229968
Otu0000425	0.0675617	0.0734646	0.0572343	0.000702662	0.0535561	0	0.0580352	0	0	0	0.0557181	0.0474767	0.0539811	0.0418083	0.0553557	0	0.0717893	0.0592787	0.076707	0	0.0514104	0.0650859	0.0561742	0.0503295	0.000826863	0.0688385	0.0601147	0.000873324	0.000859875	0	0.068992	0.0618393	0	0	0.078048	0.0638076	0.0537281	0.0549857	0.0752315	0.0652516	0	0	0.0688654	0.0587809	0.0644434	0.0691048	0.0560418	0.073864	0
Otu0000426	0.0518497	0.0313449	0.040276	0.0309171	0.0428449	0.0386942	0.0295452	0.02363	0.0336041	0.0358982	0.0325022	0.0316511	0.0395861	0.048119	0.0409632	0.02489	0.0498874	0.0384791	0.0295738	0.0220181	0.0468405	0.0380502	0.0324562	0.0299581	0.0405163	0.0384215	0.0326337	0.0235798	0.0386944	0.0355894	0.0366254	0.0262605	0.052912	0.0494954	0.0308084	0.033583	0.0392937	0.0409893	0.0277778	0.0320102	0.0428357	0.0317195	0.0270543	0.0325394	0.0523602	0.0407541	0.0364717	0.0295456	0.0632412
Otu0000427	0.0306385	0.0479969	0.049815	0.049889	0.0453167	0.057162	0.0495938	0.0383987	0.0393648	0.0471164	0.0441101	0.044145	0.0260909	0.0425972	0.038749	0.0338504	0.0401533	0.043679	0.0489816	0.0377453	0.0514104	0.0650859	0.0736506	0.033553	0.0305939	0.0560314	0.0334925	0.0550194	0.0438536	0.0418332	0.0562157	0.0567566	0.0334181	0.0467457	0.0482665	0.0470162	0.0449071	0.0359906	0.0706019	0.0640205	0.036021	0.0317195	0.0430409	0.0577313	0.0362494	0.0389822	0.0471463	0.0443184	0.0123197
Otu0000428	0.0463505	0.0636693	0.0710129	0.0548076	0.0700349	0.0879415	0.0506489	0.0886123	0.057607	0.0818927	0.0632632	0.0449779	0.0332883	0.0804613	0.120675	0.0467932	0.0644887	0.0592787	0.046209	0.0534726	0.0377009	0.0791044	0.0686573	0.0563212	0.0570536	0.108061	0.0755728	0.0785992	0.0773887	0.0499501	0.0988033	0.0381201	0.100254	0.0953245	0.0492935	0.0705242	0.072974	0.0659828	0.0914352	0.0492465	0.086645	0.0837041	0.0774736	0.052483	0.0704849	0.086824	0.049815	0.0664776	0.00328526
Otu0000429	0.0636337	0.0470173	0.0317968	0.045673	0.0601476	0.0474884	0.0580352	0.0413524	0.0633677	0.0504818	0.0580397	0.044145	0.0602789	0.0504855	0.0431774	0.0438064	0.0535378	0.0384791	0.0489816	0.0251636	0.0502679	0.0510674	0.0461876	0.0467346	0.0529192	0.0400224	0.0515269	0.0480328	0.0567517	0.0418332	0.0434394	0.0542152	0.0473423	0.0494954	0.0646977	0.0503745	0.0416994	0.0609841	0.0787037	0.05294	0.06328	0.054628	0.061487	0.052483	0.0563879	0.0531576	0.0613792	0.0605685	0.00410657
Otu0000430	0.0856306	0.0773827	0.0773723	0.0716715	0.0576758	0.0694738	0.079139	0.0590749	0.0720088	0.0661873	0.0603612	0.0574717	0.0719748	0.0591627	0.0520343	0.0527668	0.0876072	0.0623986	0.0591475	0.0518998	0.0674047	0.0640846	0.0649124	0.0766926	0.0678028	0.0808453	0.0661262	0.067246	0.0705097	0.0636863	0.0715472	0.0703104	0.0854019	0.0687436	0.0821558	0.0660465	0.0689644	0.0809789	0.0590278	0.0800256	0.0827508	0.0898718	0.066406	0.0566816	0.0966651	0.0823942	0.0560418	0.0443184	0.0172476
Otu0000431	0.0950578	0.0803213	0.0646536	0.0660502	0.0939292	0.0782679	0.0844149	0.0639978	0.0796897	0.0964764	0.0667456	0.0741302	0.103464	0.0575851	0.0808193	0.0487844	0.107076	0.0613586	0.0850246	0.0471817	0.095966	0.0911203	0.0836371	0.0467346	0.112453	0.100056	0.0790079	0.0585127	0.0816881	0.0730519	0.0570674	0.0694633	0.0863301	0.0705768	0.0657246	0.075002	0.0713701	0.0819787	0.0891204	0.0689451	0.104169	0.108375	0.0823926	0.0629796	0.0825681	0.0682189	0.0818389	0.0782958	0
Otu0000432	0.0219968	0.0205701	0.0254375	0.0161612	0.0304858	0.0334178	0.0369315	0.0295374	0.032644	0.0179491	0.0383062	0.0191572	0.0179937	0.0410195	0.038749	0.0079648	0.0559713	0.0332793	0.0332705	0.0125818	0.0422707	0.0230304	0.0287112	0.0191732	0.0223253	0.0256143	0.0214695	0.0130999	0.0395542	0.0343407	0.0323666	0.0177894	0.0241353	0.0265809	0.0246467	0.0235081	0.0425013	0.0209945	0.0243056	0.0110805	0.0194708	0.0220274	0.0172164	0.0115463	0.0100693	0.022149	0.0284657	0.0132955	0.0542068
Otu0000433	0.00707041	0.0568126	0.0635937	0.00281065	0.0634434	0.00439707	0.00527593	0.00689207	0.00192023	0.00112182	0.0742908	0.00249877	0.00269906	0.0662623	0.00664268	0.059736	0.00608384	0.00207995	0.0859488	0.00314545	0.00685471	0.00200264	0.0786438	0.0718993	0.00248059	0.0016009	0.00171756	0.00523995	0.00515925	0.0755495	0.00511052	0.00169423	0.00556969	0.00641607	0.00205389	0.0582105	0.00400956	0.00399896	0.00231482	0.060327	0.06328	0.000881096	0.00122974	0.0052483	0.00503464	0.00354384	0.00177911	0.0576139	0.0361378
Otu0000434	0.0565633	0.0842394	0.0773723	0.0639422	0.0041197	0.00439707	0.0675319	0.0767974	0.0057607	0.0617	0.0638436	0.0807936	0.0683761	0.0741506	0.0741766	0.0836304	0.0644887	0.0727984	0.0887213	0.0959361	0.0616924	0.0740978	0.0624157	0.0934691	0.0587073	0.100056	0.0755728	0.0820925	0.0034395	0.0674326	0.0621779	0.0787815	0.0686928	0.083409	0.00102695	0.0794797	0.0577376	0.00399896	0.00462963	0.0898749	0.0769096	0.0872285	0.061487	0.09237	0.0765265	0.0947976	0.0809493	0.0915913	0
Otu0000435	0.0384945	0.0323244	0.0328567	0.0337278	0.0346055	0.0386942	0.0369315	0.0275683	0.0220827	0.0381418	0.0243767	0.0391474	0.0242915	0.0331311	0.0232494	0.0368372	0.0243353	0.0311993	0.0240287	0.045609	0.0319887	0.0290383	0.0274629	0.0515279	0.0281133	0.0272152	0.0309161	0.0419196	0.0240765	0.0330919	0.0212938	0.0304961	0.0287767	0.0238311	0.0287545	0.0279858	0.0288688	0.0359906	0.0428241	0.0467842	0.0272591	0.037006	0.0405814	0.0514333	0.0312148	0.0363243	0.0382508	0.0561366	0.0123197
Otu0000436	0.0314241	0.0293858	0.0190781	0.0196745	0.0263661	0.0114324	0.0232141	0.0226454	0.032644	0.0291673	0.0400474	0.0208231	0.0188934	0.0157767	0.0254636	0.0328548	0.0377198	0.0270394	0.0351189	0.0188727	0.0285613	0.0230304	0.0399461	0.0227681	0.0388626	0.0152085	0.0223283	0.0209598	0.0240765	0.0268482	0.0229973	0.0220249	0.0380595	0.0320804	0.0287545	0.0212692	0.0449071	0.0149961	0.0289352	0.0135428	0.0408886	0.0202652	0.0319732	0.0262415	0.0392702	0.0230349	0.0409194	0.0295456	0.0353165
Otu0000437	0.0683473	0.0587717	0.0614739	0.0660502	0.0642674	0.036056	0.0696423	0.0403678	0.0710486	0.0628218	0.0795143	0.0533071	0.0530814	0.0607404	0.0575699	0.0418152	0.0669222	0.0790382	0.0739344	0.0298817	0.0696896	0.0640846	0.0736506	0.0359497	0.0587073	0.0472264	0.0644086	0.0541461	0.0739492	0.078047	0.0502534	0.0398143	0.0436292	0.078826	0.0636707	0.0425384	0.0593415	0.049987	0.0462963	0.0233921	0.0350474	0.0281951	0.0467301	0.052483	0.0382633	0.0513856	0.0524836	0.0384093	0.0123197
Otu0000438	0.0133552	0.016652	0.00847916	0.0175665	0.0189506	0.0175883	0.0158278	0.018707	0.0220827	0.01234	0.0179923	0.00999509	0.0152946	0.0102549	0.0132854	0.0308636	0.020685	0.0280794	0.0194078	0.0157272	0.0182792	0.0120159	0.023718	0.0239664	0.0206716	0.00960538	0.0103054	0.0130999	0.0171975	0.01998	0.017035	0.015248	0.0213505	0.0164985	0.0133503	0.0223886	0.0224535	0.022994	0.0231481	0.0172363	0.0165502	0.0114542	0.00860818	0.0104966	0.0211455	0.0186051	0.0204597	0.0221592	0.0550281
Otu0000439	0.0997714	0.051915	0.0763124	0.0562129	0.0914574	0.0439707	0.0685871	0.0413524	0.090251	0.0605782	0.0754515	0.0458108	0.0881691	0.0678399	0.0575699	0.0627228	0.11681	0.0946379	0.0850246	0.0534726	0.0788292	0.0700925	0.0936236	0.0683044	0.0826863	0.0448251	0.0541033	0.0401729	0.082548	0.0861638	0.0715472	0.0516739	0.112322	0.0797426	0.0893444	0.0604493	0.0769835	0.0509867	0.0636574	0.0418595	0.0944333	0.0334817	0.0700952	0.0650789	0.0714919	0.0708767	0.0925135	0.0797731	0.0188902
Otu0000441	0.023568	0.0146929	0.00953905	0.00562129	0.0082394	0.010553	0.0126622	0.011815	0.0297636	0.0145836	0.00986674	0.00999509	0.0161943	0.0157767	0.0232494	0.0109516	0.0170347	0.0280794	0.020332	0.0204454	0.0114245	0.0160211	0.0212214	0.0167765	0.0214984	0.023213	0.0128817	0.0113532	0.0154777	0.0162338	0.0119245	0.0169423	0.0102111	0.0183316	0.0174581	0.0100749	0.0168401	0.00699818	0.0219907	0.0184674	0.0301797	0.018503	0.0172164	0.00734762	0.0130901	0.0177192	0.0142328	0.010341	0.0648839
Otu0000442	0.0439937	0.0382016	0.0339166	0.0217825	0.0304858	0.0404531	0.0306004	0.0315066	0.0403249	0.0459945	0.0272786	0.0358157	0.0422852	0.0315535	0.0509272	0.0258856	0.0511042	0.0374392	0.0489816	0.0377453	0.06055	0.0380502	0.0249663	0.0227681	0.0487849	0.0400224	0.0386452	0.0384263	0.0421339	0.0274725	0.0383289	0.0245663	0.0343464	0.0384964	0.0225928	0.0223886	0.0304726	0.0389899	0.0520833	0.0504777	0.037968	0.0563901	0.0491896	0.0262415	0.0392702	0.0451839	0.0373612	0.0325001	0.0558494
Otu0000443	0.0251392	0.0342835	0.0317968	0.0295118	0.0403731	0.0527649	0.0400971	0.0177225	0.0355243	0.0358982	0.0330826	0.0158256	0.0395861	0.0354976	0.0464988	0.0418152	0.0304192	0.0353592	0.0341947	0.0235908	0.0411283	0.0480634	0.0312079	0.0275614	0.0264596	0.039222	0.0369276	0.0401729	0.0309555	0.0343407	0.0400324	0.052521	0.0473423	0.0485788	0.0472396	0.0380607	0.0384918	0.0429888	0.0462963	0.0443219	0.0311533	0.0414115	0.0479599	0.0377877	0.0392702	0.0345524	0.0444777	0.0472729	0.0164263
Otu0000444	0.109984	0.068567	0.0826718	0.0569156	0.0865137	0.0457296	0.0685871	0.0344604	0.0854504	0.0830146	0.0574593	0.0391474	0.112461	0.0631069	0.0675339	0.0567492	0.115593	0.0800782	0.118295	0.0471817	0.0868264	0.0740978	0.0948719	0.0575195	0.0835132	0.0552309	0.0738552	0.0358063	0.102325	0.0892857	0.0587709	0.0618393	0.0946847	0.0733266	0.117072	0.0537327	0.0801912	0.0609841	0.0717593	0.0430907	0.0924862	0.0555091	0.0639465	0.0671782	0.0896166	0.0753065	0.0889553	0.0561366	0.0106771
Otu0000445	0.0337809	0.0342835	0.029677	0.0196745	0.0222464	0.0518855	0.02849	0.0177225	0.0432053	0.0358982	0.0243767	0.0374816	0.0431849	0.0449637	0.0287849	0.0209076	0.0413701	0.0363992	0.0295738	0.0393181	0.0274189	0.0390515	0.023718	0.0431396	0.0520924	0.0440247	0.0300574	0.0288197	0.034395	0.0362138	0.0298113	0.0406614	0.0389878	0.0339135	0.0164312	0.0402996	0.036086	0.0389899	0.0277778	0.0320102	0.0262856	0.0414115	0.0356625	0.0230925	0.0302078	0.0487278	0.0186806	0.0295456	0.0640626
Otu0000446	0.0125696	0.016652	0.0158984	0.0182692	0.0189506	0.0193471	0.0189934	0.0157533	0.0240029	0.0168273	0.0203139	0.0133268	0.00899685	0.0157767	0.0110711	0.0169252	0.0194683	0.0270394	0.0268012	0.00629089	0.0137094	0.0220291	0.019973	0.0251648	0.00992236	0.0104058	0.0120229	0.0122265	0.0163376	0.0187313	0.013628	0.0203307	0.0148525	0.0192482	0.0225928	0.0279858	0.0208497	0.0179953	0.0127315	0.0172363	0.0107089	0.0123353	0.0184461	0.0136456	0.0120831	0.0150613	0.0124537	0.0073864	0.0476363
Otu0000447	0.183045	0.153786	0.00529947	0.00491863	0.0107112	0.137189	0.00527593	0.198885	0.00672082	0.00224364	0.191531	0.174081	0.00719748	0.159345	0.133961	0.206089	0.0036503	0.236075	0.202395	0.00786361	0.00342736	0.00400529	0.00748989	0.00599161	0.0124029	0.00400224	0.00601147	0.0034933	0.00429937	0.00749251	0.00596227	0.182976	0.223716	0.189732	0.00513473	0.00783603	0.00882103	0.0049987	0.00694444	0.00123116	0.00584124	0.000881096	0.138961	0.00839727	0.201386	0.00354384	0.00533732	0.218637	0.00821315
Otu0000448	0.0416369	0.0372221	0.049815	0.0702662	0.0354294	0.0351766	0.0527593	0.0679361	0.032644	0.0560909	0.0400474	0.0799607	0.0224921	0.048119	0.0287849	0.0487844	0.0389365	0.0374392	0.0415881	0.0345999	0.0274189	0.0420555	0.0511809	0.0515279	0.0388626	0.039222	0.0506681	0.0445395	0.027516	0.0393357	0.0511051	0.0728517	0.036203	0.039413	0.0492935	0.0705242	0.027265	0.0419891	0.0474537	0.0578647	0.0457563	0.0387682	0.0491896	0.0503837	0.0261801	0.0460699	0.0444777	0.063523	0.00739183
Otu0000449	0.0306385	0.0303654	0.0349765	0.0238905	0.0181267	0.0281413	0.0274348	0.02363	0.0182422	0.0235582	0.0330826	0.0291523	0.0287899	0.0291869	0.0309992	0.0238944	0.0194683	0.0332793	0.0434365	0.045609	0.0205641	0.0320423	0.0249663	0.0287597	0.018191	0.0528296	0.0489506	0.0471595	0.0266561	0.034965	0.0349219	0.0398143	0.0343464	0.0366633	0.037997	0.033583	0.0176421	0.0339912	0.0451389	0.0418595	0.0399151	0.0220274	0.0393517	0.0314898	0.0261801	0.0345524	0.0346926	0.0295456	0.0271034
Otu0000450	0.0785601	0.0832599	0.0964504	0.0674555	0.0617955	0.0967356	0.0706975	0.0610441	0.0614475	0.0628218	0.0539769	0.0757961	0.065677	0.0489079	0.0631055	0.0378328	0.0754396	0.0748783	0.0656168	0.0503271	0.0742594	0.090119	0.0798921	0.0431396	0.0504387	0.0960538	0.0841606	0.0785992	0.0739492	0.0593157	0.075806	0.0694633	0.0547686	0.0870753	0.0554551	0.0537327	0.0681625	0.0669826	0.0810185	0.0701763	0.0515976	0.073131	0.089771	0.0724265	0.0584018	0.0593593	0.0569314	0.0413638	0
Otu0000451	0.01964	0.0205701	0.0180182	0.0274038	0.0238943	0.0131912	0.0274348	0.0226454	0.0336041	0.0224364	0.0284394	0.0208231	0.0224921	0.0220874	0.0309992	0.0258856	0.0231186	0.0270394	0.0314221	0.0173	0.025134	0.025033	0.0324562	0.0287597	0.0305939	0.0256143	0.027481	0.0270731	0.0249364	0.0243506	0.0238491	0.0169423	0.0324898	0.0210814	0.0267006	0.0201498	0.0376899	0.0129966	0.0162037	0.0123116	0.0272591	0.0167408	0.0245948	0.0136456	0.0322217	0.0177192	0.0240179	0.0221592	0.057492
Otu0000452	0.0329953	0.0323244	0.0243776	0.0344304	0.0486125	0.0307795	0.0306004	0.0324912	0.0508862	0.0459945	0.0296002	0.0383145	0.034188	0.03392	0.0420703	0.0278768	0.0450204	0.0218395	0.0406639	0.0393181	0.0377009	0.0400529	0.0324562	0.0239664	0.0396894	0.0344193	0.0283398	0.0462862	0.0395542	0.0293457	0.0545122	0.0406614	0.0566251	0.0375799	0.0400509	0.0369413	0.05453	0.0379901	0.0358796	0.0590958	0.0447828	0.0352438	0.0221353	0.043036	0.0453117	0.0416401	0.0515941	0.0487502	0.0262821
Otu0000453	0.0471361	0.0264473	0.0137786	0.0323224	0.0477885	0.0228648	0.0379867	0.030522	0.048966	0.03702	0.036565	0.021656	0.0251912	0.0323423	0.0321063	0.044802	0.0352862	0.0530388	0.0332705	0.0487544	0.0377009	0.0410542	0.0561742	0.070701	0.0339014	0.0128072	0.0352101	0.0419196	0.0490129	0.0505744	0.0434394	0.044897	0.0473423	0.0421628	0.0431318	0.0548522	0.0497185	0.0259932	0.037037	0.0295479	0.0418622	0.0264329	0.0319732	0.0409367	0.0443048	0.0354384	0.0720538	0.0517048	0.0197116
Otu0000454	0.0746321	0.051915	0.0667734	0.0674555	0.0560279	0.0316589	0.0590904	0.0413524	0.0547267	0.0347764	0.0713888	0.0383145	0.0692758	0.0536409	0.0520343	0.0428108	0.0559713	0.0540788	0.0600717	0.0377453	0.0628349	0.0670886	0.0611674	0.0479329	0.0735908	0.0408229	0.0523857	0.0515261	0.0773887	0.0705544	0.0630297	0.0432028	0.0584817	0.0604944	0.0544282	0.0458967	0.0617472	0.0429888	0.0578704	0.0246233	0.0408886	0.0299573	0.0393517	0.0535326	0.0815611	0.0478418	0.0515941	0.0413638	0.0583133
Otu0000455	0.0133552	0.0137134	0.0243776	0.0175665	0.0189506	0.01495	0.02849	0.0167379	0.0192023	0.0190709	0.0214747	0.0133268	0.0179937	0.0149879	0.0166067	0.0209076	0.0073006	0.0239195	0.0240287	0.0173	0.0159943	0.0200264	0.019973	0.0119832	0.0157104	0.00880493	0.0231871	0.0174665	0.0120382	0.0287213	0.0255526	0.0211778	0.00928281	0.0192482	0.0215659	0.0156721	0.0160382	0.00899766	0.0196759	0.0110805	0.00973539	0.0114542	0.028284	0.0115463	0.00704849	0.0186051	0.0169015	0.0325001	0.0542068
Otu0000456	0.0573489	0.0489764	0.0392161	0.0442677	0.0601476	0.0474884	0.0348211	0.0482445	0.0393648	0.0482382	0.0528161	0.0483096	0.0602789	0.0536409	0.0520343	0.0388284	0.0389365	0.0821582	0.056375	0.0629089	0.0536953	0.0500661	0.0561742	0.0503295	0.0496118	0.0496278	0.0523857	0.0445395	0.0705097	0.0462038	0.0349219	0.0432028	0.0519837	0.0476623	0.0554551	0.0458967	0.0465109	0.0419891	0.037037	0.0541712	0.0535447	0.0502225	0.0344327	0.043036	0.0432979	0.0451839	0.0426985	0.0546593	0.0435297
Otu0000457	0.0133552	0.0382016	0.040276	0.0351331	0.0238943	0.0228648	0.045373	0.0167379	0.0105613	0.0314109	0.0342434	0.0308182	0.017094	0.03392	0.0409632	0.044802	0.0109509	0.0239195	0.0471332	0.0393181	0.0182792	0.0450595	0.0411944	0.037148	0.0132298	0.0368206	0.054962	0.0410462	0.0223567	0.0455794	0.0511051	0.060145	0.0194939	0.0339135	0.0688055	0.0324635	0.0256612	0.0469878	0.0543981	0.0627893	0.0184972	0.054628	0.0405814	0.0713768	0.0171178	0.0460699	0.0693851	0.0664776	0.015605
Otu0000458	0.0141408	0.0313449	0.0434557	0.0730768	0.0115352	0.0334178	0.0274348	0.0639978	0.016322	0.0336545	0.0296002	0.0866241	0.0188934	0.0291869	0.038749	0.0706876	0.00973414	0.0332793	0.0332705	0.0676271	0.0114245	0.0330436	0.023718	0.0623128	0.018191	0.0312175	0.0352101	0.0261997	0.0128981	0.0318432	0.0289596	0.037273	0.0176373	0.0238311	0.0297815	0.0347024	0.0112268	0.0369904	0.03125	0.05294	0.0233649	0.0352438	0.0344327	0.0314898	0.0110762	0.0203771	0.0249075	0.0413638	0.00657052
Otu0000459	0.0274961	0.0528945	0.040276	0.0386464	0.0370773	0.0606796	0.0527593	0.0344604	0.0595272	0.0437509	0.039467	0.0391474	0.0368871	0.0362865	0.0398561	0.0358416	0.0462371	0.0582387	0.0480574	0.0377453	0.0491255	0.0530701	0.0486843	0.0323547	0.0438237	0.0480269	0.0601147	0.0532728	0.0421339	0.0480769	0.0553639	0.0440499	0.0454858	0.0467457	0.0708593	0.0436579	0.0585396	0.0489873	0.0520833	0.0578647	0.0340739	0.045817	0.0590275	0.0377877	0.0463187	0.0593593	0.0569314	0.0590912	0.0147837
Otu0000460	0.0667761	0.0881575	0.0794921	0.0716715	0.0889856	0.102892	0.0801942	0.0561211	0.073929	0.00112182	0.0806751	0.0666339	0.065677	0.0859832	0.0664268	0.0378328	0.100992	0.0821582	0.0683893	0.0676271	0.00342736	0.0801057	0.0624157	0.040743	0.0636685	0.00240135	0.000858782	0.0628794	0.0816881	0.0649351	0.0715472	0.0516739	0.0399161	0.0522452	0.0492935	0.0615688	0.000801912	0.095975	0.0578704	0.0418595	0.000973539	0.06432	0.0577978	0.0335891	0.0533672	0.0575874	0.0480359	0.0310229	0.000821315
Otu0000461	0.0636337	0.0509354	0.0593541	0.0288091	0.0708589	0.0536443	0.0506489	0.0551366	0.0729689	0.0549691	0.0528161	0.0399803	0.0584795	0.0599516	0.048713	0.0627228	0.0608384	0.0592787	0.0554508	0.0503271	0.0742594	0.0540714	0.0574225	0.0527262	0.0644953	0.0632354	0.0532445	0.0506528	0.0859875	0.0555694	0.0570674	0.0398143	0.0816887	0.0779095	0.0636707	0.0470162	0.0681625	0.0479875	0.0729167	0.0541712	0.0710684	0.0581523	0.0725547	0.0608802	0.0896166	0.0682189	0.0613792	0.0753413	0.0180689
Otu0000462	0.0290673	0.0450583	0.0286172	0.051997	0.0329576	0.0351766	0.0474834	0.0393833	0.0307237	0.0258018	0.0325022	0.032484	0.00359874	0.043386	0.0509272	0.0477888	0.0243353	0.0322393	0.0332705	0.0345999	0.025134	0.0350463	0.047436	0.040743	0.0272865	0.0320179	0.0429391	0.0340596	0.0533122	0.0418332	0.0383289	0.0398143	0.0538403	0.0531617	0.0462126	0.0425384	0.0328784	0.0329914	0.0266204	0.0196986	0.0408886	0.0317195	0.0516491	0.0419864	0.0302078	0.0336665	0.0346926	0.0354547	0.028746
Otu0000463	0.01964	0.0382016	0.0381562	0.0512943	0.0214225	0.0290207	0.0432626	0.0334758	0.0259232	0.0325327	0.033663	0.0416462	0.0287899	0.0276093	0.0243565	0.0228988	0.0450204	0.0343192	0.0304979	0.0251636	0.0217066	0.028037	0.0362011	0.0311564	0.0272865	0.0360202	0.0326337	0.0340596	0.020637	0.0430819	0.0400324	0.0415085	0.0213505	0.0421628	0.0410779	0.0458967	0.0192459	0.0309919	0.0324074	0.0221609	0.025312	0.0326006	0.0344327	0.043036	0.0221524	0.0327805	0.033803	0.0457957	0.0295673
Otu0000464	0.0400657	0.0391811	0.0413359	0.0358357	0.0205985	0.0334178	0.0422075	0.0452907	0.0345642	0.0314109	0.0499141	0.0483096	0.0332883	0.0197209	0.0321063	0.0388284	0.0170347	0.0374392	0.0268012	0.0314545	0.0194217	0.0340449	0.0249663	0.040743	0.0372088	0.0328184	0.0489506	0.0305664	0.0171975	0.0255994	0.0366254	0.0516739	0.0241353	0.0439959	0.0431318	0.0458967	0.0192459	0.0279927	0.0486111	0.0357037	0.025312	0.0334817	0.0405814	0.043036	0.0362494	0.0398682	0.0435881	0.036932	0.0164263
Otu0000465	0.0479217	0.0313449	0.040276	0.0400517	0.0329576	0.0554031	0.0464282	0.0393833	0.0336041	0.0403855	0.0423689	0.0466437	0.0512821	0.0457525	0.0365347	0.0408196	0.052321	0.0353592	0.0480574	0.0424635	0.0491255	0.0300397	0.0262146	0.0455362	0.0504387	0.0456256	0.0523857	0.0480328	0.0369746	0.0362138	0.0349219	0.0584508	0.0380595	0.0265809	0.0308084	0.0503745	0.0336803	0.053986	0.0462963	0.0541712	0.0515976	0.0361249	0.0356625	0.0451354	0.042291	0.0451839	0.0453672	0	0.0361378
Otu0000466	0.0824882	0.0509354	0.0275573	0.0421597	0.0716828	0.051006	0.0580352	0.0295374	0.0864105	0.0549691	0.0580397	0.0424791	0.0692758	0.052852	0.0520343	0.0557536	0.0936911	0.0582387	0.046209	0.0471817	0.0936811	0.0520687	0.0686573	0.0431396	0.0942624	0.0416233	0.0515269	0.0384263	0.0670702	0.0487013	0.0553639	0.0465912	0.0854019	0.0458291	0.0595629	0.0324635	0.0705682	0.0409893	0.0555556	0.0307791	0.086645	0.0361249	0.0590275	0.0409367	0.069478	0.0549295	0.0711642	0.0723867	0.0164263
Otu0000467	0.0267105	0.0675874	0.0657135	0.045673	0.0379013	0.0694738	0.0527593	0.0226454	0.0432053	0.0347764	0.039467	0.0374816	0.0233918	0.0544297	0.0453916	0.02489	0.088824	0.045759	0.0517541	0.0503271	0.0377009	0.0350463	0.0249663	0.0155782	0.0388626	0.0496278	0.0377864	0.0454129	0.041274	0.0355894	0.0408841	0.029649	0.023207	0.0339135	0.0421048	0.0481356	0.0368879	0.0369904	0.0462963	0.0258544	0.0321268	0.0431737	0.0356625	0.0188939	0.0221524	0.0310086	0.0320239	0.0251138	0.0205329
Otu0000468	0.0164976	0.0313449	0.0349765	0.0562129	0.0148309	0.0334178	0.0242693	0.0472599	0.0144018	0.0314109	0.0226355	0.032484	0.0296896	0.0323423	0.0309992	0.0527668	0.020685	0.0395191	0.0240287	0.0408908	0.0262764	0.0340449	0.0262146	0.033553	0.0190179	0.0264148	0.0334925	0.0261997	0.0128981	0.0218531	0.0221456	0.037273	0.0222787	0.0366633	0.0369701	0.0156721	0.0104249	0.0219943	0.0231481	0.045553	0.0136295	0.0317195	0.0356625	0.0451354	0.0151039	0.0310086	0.0249075	0.0384093	0.00821315
Otu0000469	0.0259248	0.0274268	0.0233177	0.0358357	0.0354294	0.01495	0.0400971	0.0364295	0.041285	0.0280455	0.0243767	0.0366486	0.0296896	0.0291869	0.0265707	0.0368372	0.0304192	0.0405591	0.0443607	0.0330272	0.0399858	0.0380502	0.0486843	0.0419413	0.0330745	0.0216121	0.0257635	0.0244531	0.0257962	0.0312188	0.0306631	0.0364259	0.0473423	0.0403296	0.0277276	0.041419	0.0400956	0.0299922	0.03125	0.0369349	0.0457563	0.0290762	0.0368922	0.0388374	0.0312148	0.0292367	0.0426985	0.0413638	0.0320313
Otu0000470	0.00471361	0	0.00317968	0.0161612	0.00164788	0.0228648	0.00105519	0	0.0144018	0	0.0145099	0.000832924	0	0.000788836	0.00553557	0	0	0	0.00831762	0.00157272	0	0	0.00124832	0.00239665	0	0.0144081	0	0.000873324	0	0.01998	0.0178868	0.000847113	0.0352747	0	0.0133503	0	0.0296707	0.00199948	0	0	0.0292062	0.0140975	0	0	0.0171178	0.0177192	0.0151224	0	0.0410657
Otu0000471	0.0675617	0.0382016	0.0519348	0.0449703	0.0650913	0.0378148	0.0432626	0.0669515	0.0787296	0.0650655	0.0806751	0.0474767	0.0701754	0.0599516	0.0464988	0.0686964	0.0900408	0.0675985	0.0831762	0.0676271	0.0765443	0.0700925	0.0636641	0.0683044	0.0959161	0.0480269	0.0609735	0.0550194	0.0902869	0.0686813	0.075806	0.0567566	0.0807604	0.0540783	0.0831827	0.0582105	0.0601434	0.0789795	0.0625	0.0554023	0.0730154	0.0414115	0.066406	0.0608802	0.0896166	0.0682189	0.0809493	0.0679549	0.0279247
Otu0000472	0.023568	0.0195906	0.0243776	0.0231878	0.0255422	0.0219854	0.0200485	0.0216608	0.0374446	0.0291673	0.0296002	0.0166585	0.0260909	0.0307646	0.0287849	0.0139384	0.0438036	0.0145597	0.0314221	0.0157272	0.0239915	0.0180238	0.0249663	0.0143799	0.0289402	0.0248139	0.0163169	0.0288197	0.0249364	0.024975	0.0255526	0.0186365	0.0213505	0.0201648	0.0154042	0.0257469	0.0296707	0.0399896	0.0219907	0.0160051	0.0155766	0.0246707	0.0196758	0.0104966	0.0191316	0.0186051	0.0213493	0.0132955	0.0459936
Otu0000473	0.0549921	0.0411402	0.0381562	0.0632396	0.0395491	0.0369354	0.0527593	0.0580903	0.041285	0.0471164	0.0487533	0.0449779	0.0359874	0.0512744	0.0498201	0.0418152	0.0474539	0.0478389	0.0452848	0.0487544	0.0559802	0.0460608	0.0524292	0.0695027	0.0463043	0.0376211	0.0463742	0.0541461	0.0498727	0.0493257	0.0672884	0.0533681	0.0519837	0.0421628	0.0513474	0.0537327	0.0521243	0.0379901	0.0462963	0.0369349	0.0525711	0.037006	0.0491896	0.049334	0.0624295	0.044298	0.0435881	0.0753413	0.0123197
Otu0000474	0.0557777	0.0401606	0.0423958	0.0238905	0.0683871	0.0316589	0.0316556	0.0196916	0.0595272	0.0516036	0.0162511	0.0274865	0.0773729	0.0378641	0.0298921	0.0268812	0.0535378	0.0374392	0.0194078	0.0235908	0.0559802	0.0340449	0.0374494	0.00958658	0.0529192	0.0432242	0.0291986	0.0288197	0.0576116	0.0368382	0.0340701	0.0321903	0.0603383	0.0366633	0.0318354	0.0291052	0.0577376	0.0419891	0.0289352	0.0418595	0.0710684	0.0590334	0.0344327	0.0304401	0.0785404	0.0469558	0.0435881	0.0295456	0.00492789
Otu0000475	0.0620625	0.068567	0.0466354	0.0351331	0.0642674	0.0703532	0.0422075	0.0344604	0.0633677	0.0560909	0.0441101	0.0341499	0.0773729	0.0607404	0.0453916	0.034846	0.0584048	0.0613586	0.0388156	0.045609	0.0616924	0.0690912	0.0386978	0.0323547	0.0553998	0.076843	0.0463742	0.0515261	0.061911	0.0593157	0.0536604	0.044897	0.0547686	0.0641607	0.0431318	0.0302247	0.072974	0.0629836	0.0474537	0.0554023	0.0827508	0.0819419	0.0541086	0.0398871	0.0594087	0.0629031	0.0542627	0.0325001	0.0221755
Otu0000476	0.00392801	0.00293858	0.00635937	0.00281065	0.0041197	0.00527649	0.00527593	0	0.00768093	0.00224364	0.00464317	0.00999509	0.00899685	0.0102549	0.00664268	0.0019912	0.00608384	0.00415991	0.00554508	0.00314545	0.00913962	0.00400529	0.00374494	0.00599161	0.00909549	0.00240135	0.00171756	0.0034933	0.00515925	0.00561938	0.00340701	0.00169423	0.00464141	0.00274975	0.00205389	0.00895546	0.000801912	0.0099974	0	0.00492465	0.00681477	0.00704877	0	0.00629796	0	0.0044298	0.00800598	0.00590912	0.0525641
Otu0000477	0.0463505	0.0509354	0.0731327	0.230473	0.0181267	0.0457296	0.0812493	0.238269	0.0364844	0.0549691	0.0713888	0.25071	0.0377868	0.0331311	0.0287849	0.0238944	0.0304192	0.0311993	0.0304979	0.0440362	0.0297038	0.028037	0.0224697	0.0155782	0.0330745	0.046426	0.0506681	0.0829658	0.0361147	0.0437063	0.0476981	0.0796286	0.0380595	0.0439959	0.0646977	0.0817186	0.018444	0.0199948	0.0289352	0.0258544	0.0301797	0.027314	0.0307435	0.0283408	0.0352425	0.0256928	0.0240179	0.0236365	0.00657052
Otu0000478	0.0439937	0.0430992	0.0423958	0.0351331	0.0313097	0.0342972	0.0464282	0.0472599	0.0393648	0.02468	0.0377258	0.0258206	0.0431849	0.0299758	0.038749	0.0219032	0.0328527	0.0280794	0.0341947	0.0235908	0.0285613	0.031041	0.0337045	0.0299581	0.0463043	0.030417	0.054962	0.0358063	0.0361147	0.02997	0.0323666	0.0381201	0.0417726	0.0458291	0.0421048	0.0235081	0.0441051	0.0329914	0.037037	0.0381661	0.0447828	0.0317195	0.033203	0.0367381	0.041284	0.0372103	0.0471463	0.036932	0.0673478
Otu0000479	0.0329953	0.0264473	0.0381562	0.0330251	0.0288379	0.025503	0.0358763	0.0265837	0.032644	0.0201927	0.0377258	0.032484	0.0251912	0.0236651	0.0309992	0.034846	0.0644887	0.0343192	0.046209	0.0345999	0.0297038	0.0330436	0.0274629	0.0239664	0.0264596	0.0280157	0.0326337	0.032313	0.0335351	0.034965	0.0298113	0.0271076	0.0259919	0.0229145	0.0359431	0.0201498	0.0240574	0.0299922	0.03125	0.014774	0.0262856	0.0211463	0.0368922	0.0262415	0.027187	0.0292367	0.0266866	0.0147728	0.0377805
Otu0000480	0.0290673	0.0176315	0.0180182	0.0463757	0.0362534	0.0334178	0.0306004	0.0364295	0.041285	0.02468	0.0348238	0.0224889	0.0296896	0.0307646	0.0265707	0.0358416	0.0279856	0.0499189	0.0351189	0.0440362	0.0422707	0.0440582	0.0449393	0.0575195	0.04217	0.0248139	0.0369276	0.0366796	0.0352549	0.0468282	0.0485499	0.0423557	0.0473423	0.0265809	0.0349162	0.0358218	0.0553319	0.0329914	0.03125	0.0480154	0.0428357	0.018503	0.0467301	0.046185	0.028194	0.0177192	0.0409194	0.0457957	0.0123197
Otu0000481	0.0699185	0.0568126	0.0445156	0.0751848	0.0642674	0.0756297	0.0390419	0.0452907	0.0508862	0.0516036	0.0510749	0.0533071	0.031489	0.0733618	0.0420703	0.0477888	0.0389365	0.0603186	0.0397398	0.0518998	0.0639773	0.0450595	0.0586708	0.0623128	0.0562267	0.0440247	0.0523857	0.0602594	0.0507326	0.0487013	0.0596227	0.029649	0.0482706	0.0384964	0.0400509	0.0929129	0.0441051	0.0429888	0.0474537	0.0221609	0.0399151	0.0704877	0.0405814	0.0419864	0.028194	0.0469558	0.0302448	0.026591	0.00821315
Otu0000482	0.0361377	0.0215496	0.0180182	0.0210799	0.0370773	0.0272619	0.0263797	0.0246145	0.0316839	0.0269236	0.0284394	0.0224889	0.0251912	0.0244539	0.0309992	0.0238944	0.0438036	0.0301593	0.0341947	0.0393181	0.0342736	0.0320423	0.0374494	0.0251648	0.0396894	0.0280157	0.0291986	0.0261997	0.0352549	0.0324675	0.0255526	0.0262605	0.0334181	0.0412462	0.0297815	0.0246275	0.0376899	0.0189951	0.0277778	0.0233921	0.0214179	0.0352438	0.0307435	0.0335891	0.0372563	0.0380963	0.0471463	0.026591	0.0476363
Otu0000483	0.0369233	0.0372221	0.0328567	0.0365384	0.028014	0.0448501	0.033766	0.030522	0.0393648	0.0347764	0.033663	0.0358157	0.0395861	0.0212986	0.0321063	0.039824	0.0231186	0.0301593	0.0286496	0.028309	0.0377009	0.0410542	0.0324562	0.033553	0.0264596	0.0352197	0.047233	0.0462862	0.0223567	0.0362138	0.0468464	0.0432028	0.0287767	0.0384964	0.0318354	0.0302247	0.0304726	0.0389899	0.0439815	0.0393972	0.0233649	0.0334817	0.0381219	0.0545823	0.0382633	0.0398682	0.0355821	0.0398865	0.0139624
Otu0000484	0.0267105	0.0274268	0.0360364	0.0210799	0.0238943	0.0158295	0.0263797	0.0196916	0.0182422	0.01234	0.033663	0.0199902	0.0287899	0.0212986	0.0265707	0.0219032	0.0231186	0.0239195	0.0314221	0.0393181	0.0217066	0.028037	0.023718	0.0227681	0.018191	0.0328184	0.0231871	0.0183398	0.0309555	0.0312188	0.0281078	0.0110125	0.0259919	0.0320804	0.0143773	0.0212692	0.0256612	0.0219943	0.0289352	0.0184674	0.0204443	0.0255518	0.0135271	0.0304401	0.0191316	0.0256928	0.0249075	0.0251138	0.0509215
Otu0000485	0.0164976	0.0127339	0.0148385	0.00843194	0.0205985	0.00879415	0.00844149	0.00886123	0.0172821	0.0112182	0.0116079	0.00916216	0.0116959	0.0126214	0.0166067	0.0119472	0.0121677	0.00831981	0.0147869	0.00786361	0.0171368	0.0120159	0.0112348	0.0203715	0.00578804	0.0104058	0.0145993	0.0130999	0.013758	0.0181069	0.0153315	0.0127067	0.0111394	0.0100824	0.0102695	0.00895546	0.0128306	0.0119969	0.00694444	0.00861814	0.0146031	0.0105732	0.00860818	0.0136456	0.0120831	0.0194911	0.0115642	0.0132955	0.0361378
Otu0000486	0.0141408	0	0.0180182	0.00281065	0.00659152	0.021106	0.00105519	0.0147687	0.0144018	0.0168273	0.0354042	0.0149926	0.00179937	0.00315535	0.0143925	0	0.00121677	0	0.0110902	0.00943634	0	0.00801057	0.0124831	0.00718993	0.00496118	0.0272152	0.0154581	0.029693	0.0111784	0.0118631	0.0144798	0.0135538	0.000928281	0.0137487	0.0349162	0.0212692	0.0152363	0.00199948	0.0150463	0.00861814	0.000973539	0.00969206	0.0196758	0.00839727	0.0110762	0.00177192	0.00266866	0	0.0665265
Otu0000487	0.0290673	0.0440788	0.0275573	0.0365384	0.0477885	0.0307795	0.0390419	0.0265837	0.0422451	0.0314109	0.0406278	0.0208231	0.034188	0.0410195	0.0343205	0.0388284	0.0377198	0.0301593	0.0434365	0.0220181	0.035416	0.028037	0.0399461	0.0431396	0.0355551	0.0264148	0.0343513	0.0218331	0.0421339	0.0387113	0.0391806	0.0364259	0.0278484	0.0449125	0.0410779	0.0324635	0.0497185	0.0309919	0.0289352	0.0357037	0.0389416	0.0290762	0.0393517	0.0272911	0.0372563	0.0318945	0.0435881	0.0280683	0.03121
Otu0000488	0.0329953	0.0430992	0.0423958	0.0632396	0.041197	0.0325383	0.0548697	0.0649824	0.0393648	0.0549691	0.0441101	0.065801	0.0350877	0.038653	0.0498201	0.0677008	0.0413701	0.0363992	0.0443607	0.0534726	0.035416	0.0430568	0.0511809	0.0527262	0.0380357	0.0384215	0.0558208	0.0541461	0.0232166	0.0455794	0.0502534	0.0728517	0.0380595	0.0467457	0.0523743	0.075002	0.0513224	0.0409893	0.0625	0.060327	0.0428357	0.045817	0.0528788	0.0640292	0.0432979	0.043412	0.0524836	0.106364	0.000821315
Otu0000489	0.0204256	0.0382016	0.0688932	0.123668	0.0197746	0.0299001	0.0569801	0.124057	0.0403249	0.04936	0.039467	0.158256	0.0377868	0.0315535	0.0476059	0.122459	0.0182515	0.0343192	0.0489816	0.0990815	0.0171368	0.0390515	0.0773955	0.0874775	0.0248059	0.0264148	0.0334925	0.0340596	0.0163376	0.0268482	0.0434394	0.0474383	0.023207	0.0412462	0.0534012	0.0526133	0.018444	0.0299922	0.0405093	0.0492465	0.0184972	0.027314	0.056568	0.0776748	0.0181247	0.0407541	0.0462568	0.0517048	0.0106771
Otu0000490	0.0691329	0.0607307	0.049815	0.0421597	0.0609716	0.0562825	0.0569801	0.0492291	0.0691284	0.0516036	0.0458513	0.0349828	0.0665767	0.0394418	0.0553557	0.0457976	0.0547545	0.043679	0.0434365	0.0408908	0.0685471	0.0580767	0.0586708	0	0.0636685	0.0688385	0.0661262	0.0462862	0.0627709	0.0543207	0.0528087	0.0423557	0.05941	0.0522452	0.0451857	0.041419	0.0649549	0.0469878	0.0613426	0.0283168	0.0623065	0.0625578	0.0368922	0.0503837	0	0.0540435	0.0471463	0.0354547	0.0238181
Otu0000491	0.0267105	0.0479969	0.0551145	0.0358357	0.0543801	0.0237442	0.0253245	0.0315066	0.0384047	0.0482382	0.0510749	0.044145	0.0440846	0.0425972	0.0420703	0.0368372	0.036503	0.0415991	0.0526783	0.0550453	0.0411283	0.0470621	0.0424427	0.0395446	0.0347283	0.0496278	0.0317749	0.0384263	0.0326752	0.0530719	0.0468464	0.0389672	0.0482706	0.0357467	0.0318354	0.0369413	0.0296707	0.026993	0.0543981	0.0307791	0.048677	0.0334817	0.0430409	0.0482843	0.0624295	0.064675	0.0364717	0.0428411	0.0583133
Otu0000492	0.0329953	0.0460378	0.0360364	0.0245932	0.0255422	0.0342972	0.0295452	0.0265837	0.0364844	0.0325327	0.0237963	0.0358157	0.0449843	0.0449637	0.0376418	0.0408196	0.0401533	0.0322393	0.025877	0.0267363	0.0377009	0.0340449	0.0299596	0.0395446	0.04217	0.0424238	0.0463742	0.0445395	0.0283759	0.0274725	0.0315148	0.037273	0.0427009	0.0366633	0.037997	0.0291052	0.0376899	0.0449883	0.037037	0.0393972	0.0282326	0.0493414	0.0430409	0.0335891	0.041284	0.0531576	0.0266866	0.0487502	0.0057492
Otu0000493	0.0212112	0.0264473	0.0519348	0.0449703	0.0123591	0.0413325	0.0474834	0.0393833	0.0134416	0.0482382	0.0232159	0.0599705	0.0134953	0.0228763	0.048713	0.135402	0.0133844	0.0332793	0.0443607	0.176145	0.0171368	0.0200264	0.0586708	0.137807	0.0173641	0.0272152	0.0369276	0.0384263	0.0120382	0.0224775	0.0178868	0.0457441	0.0157808	0.0366633	0.0328623	0.0436579	0.00962294	0.0239938	0.025463	0.05294	0.00973539	0.0299573	0.0504193	0.0503837	0.0201386	0.0372103	0.0382508	0.0531821	0.00164263
Otu0000494	0.0620625	0.0421197	0.0519348	0.0512943	0.0428449	0.0342972	0.0474834	0.0354449	0.0470457	0.0403855	0.0487533	0.0266536	0.0377868	0.0394418	0.0343205	0.044802	0.0304192	0.046799	0.0591475	0.0393181	0.0377009	0.0530701	0.043691	0.0323547	0.0438237	0.0360202	0.0429391	0.034933	0.0386944	0.0586913	0.0349219	0.0381201	0.0510555	0.0311638	0.0564821	0.0402996	0.0569357	0.0319917	0.0520833	0.0332414	0.0477034	0.0246707	0.0442706	0.0304401	0.0543741	0.0487278	0.0542627	0.0620457	0.0386018
Otu0000495	0.0227824	0.0127339	0.0233177	0.0302145	0.0156549	0.0228648	0.0379867	0.0295374	0.0278434	0.0258018	0.0290198	0.0349828	0.0215924	0.03392	0.0154996	0.0179208	0.0170347	0.0239195	0.0268012	0.0125818	0.0319887	0.028037	0.0212214	0.0227681	0.0214984	0.0200112	0.0360688	0.0410462	0.0154777	0.0168581	0.0349219	0.0491326	0.0194939	0.0210814	0.0297815	0.0358218	0.0280669	0.0209945	0.0277778	0.0307791	0.0223914	0.027314	0.0270543	0.0241422	0.0201386	0.0203771	0.0489254	0.036932	0.0238181
Otu0000496	0.0172832	0.0195906	0.020138	0.0112426	0.0222464	0.036056	0.0390419	0.0255991	0.0307237	0.0179491	0.0272786	0.0166585	0.0152946	0.0173544	0.0221423	0.0209076	0.0340695	0.0280794	0.0304979	0.0125818	0.0319887	0.0230304	0.0349528	0.0275614	0.018191	0.0256143	0.0249047	0.0270731	0.0197771	0.0224775	0.0221456	0.0245663	0.0176373	0.0274975	0.0277276	0.0369413	0.0248593	0.0209945	0.0185185	0.0221609	0.0282326	0.0220274	0.0270543	0.0241422	0.0302078	0.0230349	0.0284657	0.026591	0.0320313
Otu0000497	0.0133552	0.0127339	0.0180182	0.0428624	0.014007	0.0184677	0.0189934	0.0571057	0.00960117	0.0201927	0.0191531	0.0591376	0.0179937	0.0197209	0.019928	0.039824	0.0194683	0.0166396	0.0147869	0.0235908	0.0159943	0.0240317	0.0137315	0.0347513	0.0173641	0.023213	0.0163169	0.0227064	0.020637	0.0218531	0.013628	0.0237192	0.0250636	0.0238311	0.0246467	0.033583	0.0128306	0.026993	0.0243056	0.0246233	0.0214179	0.0140975	0.0184461	0.0262415	0.0191316	0.0230349	0.0177911	0.0221592	0.0188902
Otu0000498	0	0.00489764	0	0.00491863	0	0.00527649	0.00316556	0.00295374	0	0	0.00232159	0.00166585	0	0.00552185	0.00442845	0.0039824	0	0.00311993	0.00646926	0.0110091	0	0.00200264	0.0137315	0.0131815	0	0.0016009	0	0	0.000859875	0.000624376	0	0	0	0	0	0	0	0.00399896	0.00115741	0	0	0.00264329	0	0	0	0.000885959	0	0	0.00164263
Otu0000499	0.000785601	0.0068567	0.00105989	0.0344304	0.0041197	0.00263824	0.00633112	0.00295374	0.711447	0.0100964	0.0417886	0.00249877	0.0386865	0.00552185	0.00442845	0.0019912	0.787248	0.00831981	0.00277254	0.00471817	0.00799717	0.00200264	0.00998652	0.00479329	0.00413432	0.0016009	0.0386452	0.00698659	0.00859875	0.0024975	0.00681402	0.00254134	0.00649797	0.00274975	0	0.00559716	0.0368879	0.00799792	0.00462963	0	0.00584124	0.000881096	0.00860818	0.698023	0.00906235	0.0115175	0.00622687	0.00443184	0
Otu0000500	0.0573489	0.0587717	0.0508749	0.0569156	0.0840419	0.0536443	0.0527593	0.0590749	0.0672082	0.0852582	0.0725496	0.0508084	0.062978	0.0749395	0.0608912	0.0338504	0.0438036	0.042639	0.0480574	0.0644816	0.0434132	0.0480634	0.0324562	0.0419413	0.0562267	0.0656368	0.0678438	0.0724859	0.0791085	0.0655594	0.0621779	0.0626864	0.0566251	0.0559115	0.0657246	0.0772408	0.0681625	0.0599844	0.0821759	0.045553	0.0691213	0.0757743	0.0516491	0.0598306	0.0584018	0.0549295	0.0560418	0.0561366	0.0180689
Otu0000501	0.000785601	0.00293858	0.00423958	0	0.00082394	0.0422119	0.0263797	0	0.000960117	0.0314109	0.0388866	0.0341499	0	0.0623181	0.0365347	0.000995599	0.0425868	0.0353592	0.025877	0.0267363	0.0022849	0.0540714	0	0.0299581	0.0587073	0.0600336	0.0515269	0.0462862	0.0593314	0.0499501	0.0374771	0.0669219	0.000928281	0.000916582	0.0534012	0.0503745	0.00160382	0.0589847	0.0231481	0.0517089	0	0	0.0491896	0.0146952	0.0493395	0.0602452	0.000889553	0.0723867	0.0246394
Otu0000502	0.0015712	0	0	0.00140532	0.00082394	0	0	0.000984581	0.000960117	0	0.000580397	0.000832924	0.00179937	0	0	0	0	0	0	0	0	0.00100132	0.00249663	0.0227681	0	0.000800448	0	0	0	0	0.000851752	0.0245663	0	0.000916582	0.037997	0	0	0	0.00231482	0.00123116	0	0.000881096	0	0.00209932	0	0.000885959	0.00177911	0.0280683	0.075561
Otu0000503	0.0361377	0.00391811	0.0243776	0.0126479	0.0255422	0.0167089	0.0211037	0.00886123	0.0403249	0.0112182	0.0203139	0	0.0260909	0.0205097	0	0.0109516	0.0243353	0.0145597	0.0184836	0.00943634	0.0022849	0.0190251	0.0174764	0.0107849	0.0281133	0.016009	0.0180344	0.0104799	0.0300956	0.0162338	0.0178868	0.0127067	0.046414	0.0229145	0.019512	0.0145526	0.0208497	0.0139964	0.0231481	0.0123116	0.0262856	0.018503	0.0258245	0.0157449	0.0211455	0.0248069	0.0124537	0.0118182	0.0878807
Otu0000504	0.0479217	0.0489764	0.0466354	0.0618342	0.0403731	0.0589208	0.0538145	0.0364295	0.0547267	0.0628218	0.0533965	0.0583047	0.048583	0.0615292	0.0542485	0.0557536	0.0389365	0.0488789	0.0582234	0.0440362	0.0525528	0.0470621	0.0524292	0.0599161	0.0487849	0.0664372	0.0738552	0.0567661	0.0490129	0.0480769	0.0570674	0.0559095	0.0482706	0.0559115	0.0636707	0.0447773	0.0489166	0.0609841	0.0648148	0.0554023	0.0496505	0.0687255	0.0577978	0.0629796	0.0634364	0.044298	0.0604896	0.0384093	0.00657052
Otu0000505	0.00864162	0.00783622	0.00741926	0.00983726	0.00494364	0.0061559	0.0105519	0.00787665	0.00480058	0.00785273	0.00754515	0.00666339	0.00719748	0.00473302	0.00332134	0.0069692	0.00851737	0.00935979	0.00369672	0.00471817	0.00456981	0.00801057	0.00624157	0.00119832	0.0066149	0.00880493	0.00601147	0.00436662	0.00515925	0.00499501	0.00596227	0.00592979	0.00556969	0.00641607	0.00513473	0.00559716	0.00561338	0.00899766	0.00694444	0.00738698	0.00876185	0.00440548	0.00737844	0.00944693	0.00604157	0.00354384	0.00889553	0.00886368	0.0566707
Otu0000506	0.0212112	0.0293858	0.0127187	0.0252958	0.0222464	0.0281413	0.0295452	0.0255991	0.0192023	0.0336545	0.0179923	0.0199902	0.0224921	0.0394418	0.0420703	0.0686964	0.0255521	0.0259994	0.0286496	0.0707725	0.0297038	0.0290383	0.0374494	0.0623128	0.0214984	0.0312175	0.0257635	0.0366796	0.0146179	0.02997	0.0161833	0.0254134	0.0213505	0.0256643	0.0164312	0.0279858	0.0200478	0.0219943	0.03125	0.0430907	0.0311533	0.0387682	0.0196758	0.0314898	0.0211455	0.0363243	0.0222388	0.0310229	0.0517428
Otu0000507	0	0.0244882	0.0275573	0.0175665	0.00164788	0.0430913	0.0189934	0	0	0.0280455	0.0116079	0.00749631	0.00359874	0.0331311	0.0354276	0	0.00121677	0.0239195	0.020332	0	0.00114245	0.0260344	0.019973	0	0.00165373	0.0368206	0.0206108	0.0235798	0.00257962	0.0243506	0.0238491	0.0186365	0.00278484	0.0494954	0.0349162	0.0179109	0.00240573	0.0359906	0.0601852	0.0443219	0	0.0466981	0.0577978	0.0514333	0.00100693	0.0389822	0.0462568	0.0428411	0.00328526
Otu0000508	0.0597057	0.0597512	0.0635937	0.0625369	0.0535561	0.0554031	0.0865253	0.0571057	0.0643278	0.0482382	0.0835771	0.0449779	0.0503824	0.0520632	0.0741766	0.039824	0.0973414	0.0634386	0.0720861	0.0440362	0.0514104	0.0620819	0.0536775	0.0635111	0.0669759	0.0496278	0.0489506	0.0593861	0.0696499	0.0699301	0.0553639	0.0542152	0.0427009	0.0559115	0.0492935	0.057091	0.0697663	0.0569852	0.0520833	0.0357037	0.0564653	0.0352438	0.056568	0.0398871	0.0432979	0.0558154	0.0524836	0.0517048	0
Otu0000509	0.00785601	0.0146929	0.0275573	0.0189719	0.0107112	0.0158295	0.00844149	0.00984582	0.0105613	0.0100964	0.0145099	0.0166585	0.0161943	0.0165656	0.0254636	0.0517712	0.00973414	0.0197596	0.0240287	0.084927	0.00685471	0.0100132	0.0249663	0.0754943	0.0173641	0.0176099	0.0171756	0.0375529	0.006879	0.00686813	0.0255526	0.0304961	0.00835453	0.0164985	0.0225928	0.0279858	0.00561338	0.0129966	0.0416667	0.273318	0.0107089	0.0167408	0.0368922	0.259266	0.00906235	0.0115175	0.0329135	0.264433	0.0114984
Otu0000510	0.0322097	0.0127339	0.0190781	0.0210799	0.0296619	0.0219854	0.0211037	0.0147687	0.0230428	0.0201927	0.0197335	0.0149926	0.0305893	0.0228763	0.0143925	0.0129428	0.0267689	0.0145597	0.025877	0.0173	0.0468405	0.0270357	0.023718	0.0179748	0.0264596	0.0184103	0.0231871	0.0200865	0.0223567	0.0143606	0.0178868	0.0211778	0.029705	0.0183316	0.0174581	0.0223886	0.0248593	0.026993	0.0231481	0.0270856	0.0340739	0.0264329	0.0184461	0.0209932	0.0342355	0.0283507	0.0231284	0.0236365	0.0246394
Otu0000511	0.0439937	0.0205701	0.0264974	0.0484837	0.041197	0.0342972	0.0432626	0.0383987	0.0364844	0.0381418	0.0412082	0.0308182	0.0287899	0.0220874	0.0276778	0.0189164	0.0377198	0.0270394	0.0314221	0.0235908	0.0319887	0.0360476	0.0312079	0.0227681	0.0289402	0.0184103	0.0352101	0.0331863	0.0266561	0.0274725	0.0366254	0.0381201	0.0399161	0.0329969	0.0328623	0.0447773	0.0416994	0.0139964	0.0277778	0.0283168	0.0399151	0.0158597	0.0245948	0.0199435	0.0261801	0.0283507	0.0409194	0.0132955	0.0279247
Otu0000512	0	0	0	0.00421597	0	0	0.00211037	0.0108304	0	0	0.00174119	0.00832924	0	0	0.0121782	0.378328	0	0	0	0.308254	0	0	0.00249663	0.270821	0	0	0.00257635	0	0	0	0	0	0	0	0	0	0	0	0	0	0	0.000881096	0	0	0	0	0	0	0
Otu0000513	0.00864162	0.0205701	0.0233177	0.0161612	0.0164788	0.0272619	0.0253245	0.0206762	0.0288035	0.0145836	0.0191531	0.0149926	0.0179937	0.0197209	0.00996402	0.0169252	0.0133844	0.0239195	0.0147869	0.0141545	0.0194217	0.0140185	0.019973	0.0155782	0.0107492	0.0208117	0.0188932	0.0314397	0.0111784	0.0156094	0.0178868	0.0355787	0.00835453	0.0146653	0.0143773	0.0134332	0.0152363	0.0129966	0.0138889	0.0209298	0.0107089	0.0229085	0.0270543	0.0304401	0.0161108	0.0239209	0.0133433	0.0206819	0.0279247
Otu0000514	0.0267105	0.0225291	0.0360364	0.0259985	0.0337816	0.0175883	0.0221589	0.0226454	0.0374446	0.0112182	0.0417886	0.0249877	0.0269906	0.0299758	0.0177138	0.029868	0.0146012	0.0155997	0.0147869	0.0110091	0.0137094	0.0170225	0.0112348	0.0119832	0.0314208	0.0216121	0.027481	0.0174665	0.0300956	0.0305944	0.0357736	0.0288018	0.0278484	0.0229145	0.0328623	0.0358218	0.0296707	0.0169956	0.0138889	0.014774	0.0331003	0.0176219	0.0196758	0.0283408	0.0392702	0.0301226	0.0204597	0.0177274	0.0402444
Otu0000515	0.0290673	0.0499559	0.0434557	0.0288091	0.042021	0.0281413	0.0348211	0.0403678	0.0355243	0.0415073	0.0441101	0.0391474	0.0404858	0.0394418	0.0431774	0.0438064	0.0462371	0.0395191	0.036043	0.0440362	0.0342736	0.0380502	0.047436	0.0287597	0.023979	0.0352197	0.0386452	0.0340596	0.0378345	0.0343407	0.0451429	0.0398143	0.0399161	0.0412462	0.0338893	0.041419	0.0384918	0.0369904	0.037037	0.0381661	0.0457563	0.0414115	0.0393517	0.0377877	0.0432979	0.0540435	0.0302448	0.0443184	0.0344952
Otu0000516	0.0432081	0.0460378	0.0466354	0.0351331	0.0453167	0.0316589	0.0464282	0.0364295	0.0336041	0.0403855	0.0464317	0.0349828	0.0548808	0.0347088	0.0332134	0.0219032	0.0243353	0.0363992	0.0295738	0.0173	0.0456981	0.028037	0.0187247	0.0155782	0.0372088	0.046426	0.0240459	0.0340596	0.041274	0.0355894	0.0255526	0.0254134	0.0454858	0.050412	0.0318354	0.0347024	0.0425013	0.0289925	0.0381944	0.0209298	0.0447828	0.0299573	0.0209056	0.0283408	0.0322217	0.0292367	0.0249075	0.0206819	0.0550281
Otu0000517	0.0903442	0.0754236	0.0752525	0.0611316	0.0774504	0.093218	0.0770286	0.065967	0.0796897	0.0751618	0.064424	0.0591376	0.0674764	0.0757283	0.0730695	0.0358416	0.088824	0.0592787	0.0619201	0.0487544	0.0765443	0.0650859	0.0599191	0.0503295	0.0636685	0.0800448	0.0764316	0.0628794	0.0859875	0.0593157	0.0732507	0.0542152	0.0631231	0.0760763	0.0462126	0.0626882	0.0745778	0.0849779	0.0694444	0.05294	0.0759361	0.0925151	0.0651762	0.0440857	0.0714919	0.0735346	0.0551523	0.0576139	0
Otu0000518	0.0164976	0.00195906	0.0211979	0.0119452	0.0263661	0.0123118	0.0105519	0	0.0153619	0.0157055	0.0249571	0.00166585	0.0215924	0.0228763	0.0287849	0	0.0121677	0.00727984	0.0212561	0.0141545	0.0148519	0	0.0362011	0.0107849	0	0.0120067	0.0231871	0	0	0.0212288	0.0144798	0.0110125	0.0167091	0.0164985	0	0.0212692	0.0144344	0.0179953	0.0173611	0	0.00778831	0.0132164	0	0.0157449	0.014097	0.00177192	0.0177911	0.00295456	0.0624199
Otu0000519	0.0447793	0.051915	0.0667734	0.0470783	0.0584998	0.0606796	0.0517041	0.0492291	0.0451255	0.0594564	0.0446905	0.0624693	0.0737742	0.00236651	0.00221423	0.0487844	0.00121677	0.0405591	0.0277254	0.00314545	0.0137094	0.0500661	0.00124832	0.0323547	0.0355551	0.0288161	0.059256	0.0611327	0.0576116	0.0487013	0.0494016	0.0567566	0.0519837	0.0705768	0.0657246	0.0626882	0.00240573	0.053986	0.0520833	0.0320102	0.0457563	0.0590334	0.0627167	0.0608802	0.0614226	0.0611312	0.0560418	0.0620457	0.0106771
Otu0000520	0.000785601	0.000979528	0.00317968	0.0119452	0	0.000879415	0.0105519	0.00886123	0	0.00673091	0.00290198	0.00166585	0	0	0	0.000995599	0	0.00103998	0.00092418	0	0	0.00500661	0	0	0	0	0.00687025	0.0113532	0	0.00124875	0.00340701	0.00847113	0	0.000916582	0.0133503	0.0111943	0.000801912	0	0.00115741	0.00123116	0.000973539	0	0.00122974	0.00104966	0.00201386	0	0.000889553	0.00147728	0.0714544
Otu0000521	0.0149264	0.0195906	0.0381562	0.0491863	0.013183	0.0307795	0.0474834	0.0285529	0.024963	0.0224364	0.0388866	0.0316511	0.014395	0.0220874	0.0276778	0.0368372	0.0231186	0.0322393	0.036043	0.0251636	0.012567	0.025033	0.0187247	0.0191732	0.023979	0.0264148	0.0291986	0.0497795	0.0257962	0.0412088	0.0281078	0.0440499	0.0204222	0.028414	0.0431318	0.049255	0.027265	0.0299922	0.025463	0.0344726	0.0243385	0.0202652	0.033203	0.0230925	0.027187	0.0230349	0.0346926	0.0428411	0.0246394
Otu0000522	0.0659905	0.0617103	0.0529947	0.0463757	0.0617955	0.000879415	0.0506489	0.0374141	0.048966	0.00560909	0.0592004	0.0491425	0.0476833	0.0244539	0.0243565	0.009956	0.0547545	0.0384791	0.0480574	0.0393181	0.0525528	0.00300396	0.0324562	0.0251648	0.0578804	0.0352197	0.039504	0.0366796	0.0567517	0.0711788	0.0579192	0.0389672	0.052912	0.0769929	0.0801019	0.0537327	0.0593415	0.0259932	0.0717593	0.0406284	0.0642536	0.0158597	0.0356625	0.0398871	0.055381	0.0398682	0.0507045	0.0398865	0.00164263
Otu0000523	0.0337809	0.0333039	0.0328567	0.041457	0.0321337	0.021106	0.0316556	0.0255991	0.0345642	0.0201927	0.0266982	0.0349828	0.0251912	0.0205097	0.0354276	0.0179208	0.0182515	0.0353592	0.0212561	0.0361726	0.0171368	0.028037	0.023718	0.0239664	0.0264596	0.0176099	0.0283398	0.0200865	0.0214969	0.0387113	0.0298113	0.0245663	0.0408444	0.0348301	0.0349162	0.0201498	0.0376899	0.0279927	0.0462963	0.0283168	0.0262856	0.0290762	0.0221353	0.0241422	0.041284	0.0283507	0.0302448	0.0251138	0.0501002
Otu0000524	0.0204256	0.0195906	0.0169583	0.0168639	0.0156549	0.0263824	0.0179382	0.00787665	0.0105613	0.0224364	0.0179923	0.021656	0.0224921	0.0134102	0.0143925	0.0139384	0.0073006	0.0114397	0.0175594	0.0204454	0.0114245	0.0130172	0.0162281	0.0215698	0.0124029	0.0272152	0.0188932	0.0130999	0.0128981	0.0237263	0.0204421	0.0228721	0.0129959	0.021998	0.0164312	0.0123138	0.0232554	0.0209945	0.0173611	0.0369349	0.00778831	0.0308384	0.0209056	0.0272911	0.0100693	0.0177192	0.0151224	0.026591	0.0139624
Otu0000525	0.0322097	0.0362425	0.0180182	0.0344304	0.0197746	0.0237442	0.0474834	0.0295374	0.0230428	0.0235582	0.0266982	0.0466437	0.0224921	0.0197209	0.038749	0.0278768	0.0243353	0.0176796	0.0175594	0.0204454	0.0194217	0.0170225	0	0.0191732	0.023979	0.0440247	0.019752	0.0183398	0.020637	0.0287213	0.0255526	0.0228721	0.0222787	0.0164985	0.0225928	0.0425384	0.0200478	0.0209945	0.0127315	0.0184674	0.0262856	0.0229085	0.0258245	0.0398871	0.0292009	0.0044298	0.0142328	0.0221592	0.0147837
Otu0000526	0.023568	0.0235087	0.020138	0.0161612	0.0247182	0.0246236	0.0316556	0.0265837	0.0432053	0.03702	0.0429493	0.021656	0.0188934	0.0141991	0.0243565	0.0228988	0.0401533	0.0280794	0.0314221	0.00943634	0.0331311	0.025033	0.0274629	0.0359497	0.0256328	0.0192108	0.0266222	0.0270731	0.0318154	0.0355894	0.0383289	0.044897	0.0315616	0.0183316	0.0287545	0.0257469	0.0368879	0.0219943	0.0208333	0.0160051	0.0340739	0.0246707	0.0233651	0.0199435	0.0191316	0.0230349	0.0515941	0.026591	0.013141
Otu0000527	0.0369233	0.0313449	0.0370963	0.045673	0.0238943	0.0237442	0.0327108	0.0344604	0.0259232	0.0560909	0.036565	0.0349828	0.0224921	0.0244539	0.0321063	0.0408196	0.0255521	0.0301593	0.0480574	0.0188727	0.0319887	0.0420555	0.0262146	0.033553	0.0314208	0.0384215	0.0334925	0.0401729	0.0266561	0.0405844	0.0417359	0.0499797	0.0389878	0.0476623	0.0369701	0.0369413	0.0296707	0.0409893	0.0428241	0.0357037	0.0311533	0.0475792	0.0504193	0.0367381	0.0332286	0.044298	0.0426985	0.0517048	0.0246394
Otu0000528	0.0424225	0.00195906	0.0360364	0.00351331	0.0403731	0.0307795	0.0295452	0.000984581	0.0355243	0.0302891	0.00754515	0.0366486	0.0530814	0.0402307	0.00221423	0.0019912	0.0279856	0.0405591	0.0314221	0.00157272	0.0285613	0.0090119	0.0312079	0.0227681	0.0512655	0.0640359	0.039504	0.0445395	0.0361147	0.0362138	0.0391806	0.0406614	0.00742625	0.0705768	0.0287545	0.0291052	0.0408975	0.0329914	0.0393519	0.0320102	0.00292062	0.000881096	0.00368922	0.0346388	0.0322217	0.00177192	0.0373612	0.0295456	0.00903446
Otu0000529	0.0597057	0.0568126	0.0476953	0.043565	0.0469646	0.0439707	0.0379867	0.0521828	0.057607	0.0572127	0.0441101	0.0649681	0.0755735	0.0489079	0.0476059	0.054758	0.0292024	0.0239195	0.025877	0.0377453	0.0377009	0.0370489	0.023718	0.0251648	0.0512655	0.0576323	0.0601147	0.0585127	0.0601912	0.0543207	0.0476981	0.0592979	0.0603383	0.050412	0.0431318	0.0593299	0.0561338	0.0639834	0.0474537	0.0467842	0.0467299	0.0484603	0.0491896	0.043036	0.0453117	0.042526	0.0400299	0.0590912	0.0057492
Otu0000530	0.0219968	0.0293858	0.029677	0.0154586	0.0181267	0.0430913	0.0263797	0.0127996	0.0153619	0.0336545	0.0185727	0.010828	0.0260909	0.0465413	0.0575699	0.0358416	0.0194683	0.0353592	0.0378914	0.0330272	0.0194217	0.0350463	0.0399461	0.0359497	0.0148835	0.0264148	0.0309161	0.0183398	0.0180574	0.0262238	0.0306631	0.0177894	0.0213505	0.0183316	0.037997	0.0223886	0.0144344	0.0349909	0.0358796	0.0430907	0.0184972	0.0502225	0.0270543	0.0293905	0.014097	0.0354384	0.0302448	0.0280683	0.0106771
Otu0000531	0.00392801	0.0254677	0.0445156	0.00351331	0.00082394	0.051006	0.0242693	0.00984582	0.00192023	0.04936	0.0243767	0.00499754	0.00359874	0.0496967	0.0309992	0.0109516	0.00243353	0.0259994	0.0175594	0.00471817	0.00456981	0.025033	0.019973	0.00838826	0	0.0448251	0.0360688	0.0157198	0.00257962	0.0518232	0.0459946	0.0160951	0.00835453	0.0476623	0.0636707	0.00895546	0.00160382	0.0689821	0.0324074	0.00984931	0.00292062	0.045817	0.0344327	0.0115463	0.00402771	0.0593593	0.033803	0.0073864	0.00739183
Otu0000532	0.0219968	0.018611	0.0222578	0.0189719	0.0255422	0.0246236	0.0232141	0.0196916	0.0201625	0.0258018	0.0255374	0.021656	0.017094	0.0244539	0.0332134	0.0139384	0.0255521	0.0218395	0.0286496	0.0188727	0.0171368	0.0270357	0.0187247	0.0155782	0.0173641	0.0176099	0.0249047	0.0218331	0.0352549	0.0237263	0.0289596	0.0177894	0.0241353	0.0229145	0.019512	0.0190303	0.0248593	0.022994	0.0231481	0.00984931	0.0214179	0.0211463	0.0184461	0.0146952	0.0372563	0.0239209	0.0284657	0.0162501	0.0624199
Otu0000533	0.00864162	0	0.0254375	0.0189719	0.00082394	0.0184677	0.011607	0.0196916	0.0144018	0.0224364	0.0133491	0.0224889	0.0197931	0.0197209	0.00774979	0.014934	0.00851737	0.0124797	0.0110902	0.0141545	0.00342736	0	0.0174764	0.00958658	0.00826863	0.030417	0.0352101	0.0244531	0.006879	0.0106144	0.0212938	0.0203307	0.00742625	0.0137487	0.0174581	0.0167915	0.00320765	0.0179953	0.00925926	0.0184674	0.00876185	0.018503	0.0122974	0.00734762	0.0120831	0.0230349	0.0115642	0.0118182	0.0804888
Otu0000534	0.0274961	0.0342835	0.0317968	0.0182692	0.02719	0.025503	0.0379867	0.0275683	0.0288035	0.0314109	0.0342434	0.0233219	0.0287899	0.0323423	0.0265707	0.014934	0.0401533	0.0239195	0.0351189	0.0204454	0.0217066	0.0290383	0.0287112	0.0143799	0.0272865	0.0296166	0.0300574	0.0288197	0.027516	0.0274725	0.0298113	0.0127067	0.023207	0.0256643	0.0338893	0.0190303	0.0232554	0.0279927	0.0381944	0.0135428	0.0233649	0.0246707	0.0307435	0.0304401	0.0261801	0.0230349	0.0169015	0.0118182	0.0336739
Otu0000535	0.0345665	0.0411402	0.0211979	0.0252958	0.0247182	0.0228648	0.0263797	0.011815	0.0336041	0.0325327	0.0301806	0.0166585	0.031489	0.0323423	0.0309992	0.0288724	0.0401533	0.0374392	0.0286496	0.0235908	0.0319887	0.031041	0.0274629	0.0479329	0.0330745	0.0208117	0.0360688	0.0235798	0.0404141	0.0330919	0.0357736	0.0254134	0.0399161	0.0339135	0.0225928	0.0291052	0.0489166	0.0219943	0.025463	0.0307791	0.0331003	0.0378871	0.0258245	0.0335891	0.041284	0.0318945	0.0489254	0.0295456	0.0369592
Otu0000536	0.0306385	0.016652	0.0180182	0.0161612	0.0148309	0.01495	0.0200485	0.0216608	0.016322	0.0190709	0.0284394	0.0224889	0.0233918	0.0205097	0.0154996	0.0228988	0.0243353	0.0103998	0.0212561	0.0220181	0.0217066	0.0150198	0.0224697	0.00958658	0.0339014	0.0176099	0.0180344	0.0165932	0.0292357	0.0231019	0.0315148	0.0177894	0.0278484	0.0265809	0.037997	0.0212692	0.0248593	0.0119969	0.0277778	0.0295479	0.0301797	0.0176219	0.0110677	0.0188939	0.0231593	0.022149	0.0204597	0.0236365	0.0928086
Otu0000537	0.0353521	0.035263	0.0370963	0.0330251	0.0436688	0.0439707	0.0295452	0.0521828	0.0316839	0.0516036	0.0226355	0.0566388	0.0332883	0.0441748	0.0376418	0.0477888	0.0450204	0.0353592	0.0231045	0.0424635	0.0388434	0.0400529	0.0449393	0.0718993	0.0231522	0.0664372	0.0403627	0.0392996	0.0386944	0.0355894	0.0400324	0.0550623	0.0399161	0.0366633	0.0256737	0.0436579	0.0304726	0.053986	0.0358796	0.0480154	0.0369945	0.0475792	0.0467301	0.0419864	0.041284	0.0283507	0.0391403	0.0546593	0.00657052
Otu0000538	0.0243536	0.018611	0.0254375	0.0344304	0.0255422	0.01495	0.0221589	0.0452907	0.0288035	0.0224364	0.0197335	0.0416462	0.0350877	0.0299758	0.0365347	0.0378328	0.0340695	0.0259994	0.036043	0.0314545	0.0239915	0.0510674	0.0574225	0.0395446	0.0272865	0.0264148	0.0188932	0.0288197	0.0335351	0.0293457	0.0212938	0.0254134	0.0269201	0.028414	0.0277276	0.0257469	0.0344822	0.0329914	0.037037	0.0430907	0.0262856	0.0352438	0.0430409	0.0314898	0.0231593	0.0496137	0.0311344	0.0339774	0.0205329
Otu0000539	0.0259248	0.0362425	0.0254375	0.0323224	0.0313097	0.025503	0.02849	0.0364295	0.024963	0.0269236	0.033663	0.0233219	0.0260909	0.0197209	0.0321063	0.0219032	0.0219018	0.0218395	0.0388156	0.0393181	0.0377009	0.0320423	0.0287112	0.0311564	0.0330745	0.030417	0.0317749	0.0410462	0.0283759	0.02997	0.0264043	0.0304961	0.0324898	0.0247477	0.0297815	0.0302247	0.0425013	0.0299922	0.0428241	0.0381661	0.0282326	0.0387682	0.0307435	0.0325394	0.0332286	0.0203771	0.0311344	0.0413638	0.00739183
Otu0000540	0.0392801	0.0372221	0.029677	0.0274038	0.028014	0.0307795	0.0189934	0.0285529	0.0278434	0.0358982	0.0249571	0.0308182	0.0431849	0.0347088	0.0365347	0.029868	0.0219018	0.0301593	0.0286496	0.0267363	0.0319887	0.0210278	0.019973	0.0311564	0.0388626	0.0384215	0.0455154	0.0305664	0.041274	0.0231019	0.0247008	0.0330374	0.0427009	0.0265809	0.0267006	0.0257469	0.0336803	0.0399896	0.0243056	0.0381661	0.0399151	0.0449359	0.0233651	0.049334	0.0453117	0.0398682	0.0391403	0.0251138	0.0172476
Otu0000541	0.00392801	0.0264473	0.0211979	0.0182692	0.00494364	0.0184677	0.00949668	0.0167379	0.00672082	0.0190709	0.0179923	0.0233219	0.00719748	0.0173544	0.0276778	0.0418152	0.00851737	0.0124797	0.0147869	0.0377453	0.00685471	0.0240317	0.0174764	0.0515279	0.00496118	0.0240134	0.019752	0.0192131	0.00601912	0.0237263	0.0127763	0.0135538	0.00742625	0.0146653	0.0205389	0.0179109	0.00721721	0.0249935	0.0173611	0.0221609	0.00681477	0.0255518	0.0221353	0.0188939	0.00302078	0.0168332	0.0204597	0.0221592	0.0180689
Otu0000542	0.0502785	0.051915	0.0370963	0.0604289	0.041197	0.0492472	0.0580352	0.0511982	0.0441654	0.03702	0.0464317	0.0558059	0.048583	0.0512744	0.0498201	0.0587404	0.0620551	0.0582387	0.0480574	0.0424635	0.0536953	0.0390515	0.0424427	0.0539245	0.0372088	0.0432242	0.0583972	0.0366796	0.0438536	0.0430819	0.0434394	0.0550623	0.0417726	0.0494954	0.0698324	0.0481356	0.0521243	0.0439886	0.056713	0.0480154	0.0525711	0.0352438	0.0504193	0.0503837	0.0432979	0.0531576	0.0604896	0.0561366	0.00328526
Otu0000543	0.0243536	0.018611	0.0148385	0.0182692	0.0288379	0.0167089	0.0253245	0.0177225	0.0192023	0.0179491	0.0191531	0.0133268	0.031489	0.0252428	0.0132854	0.0139384	0.015818	0.0166396	0.0212561	0.0204454	0.0274189	0.0230304	0.019973	0.0143799	0.0157104	0.0136076	0.0154581	0.0192131	0.0171975	0.0162338	0.0272561	0.0220249	0.0120677	0.0164985	0.0256737	0.00895546	0.018444	0.0169956	0.0208333	0.0221609	0.0107089	0.0176219	0.0245948	0.0125959	0.0161108	0.021263	0.0142328	0.0206819	0.0418871
Otu0000544	0.0707041	0.0362425	0.0551145	0.0463757	0.0502604	0.0404531	0.0601456	0.0433216	0.0528064	0.04936	0.0487533	0.0408133	0.0557805	0.0441748	0.058677	0.0507756	0.0644887	0.0540788	0.0489816	0.0534726	0.0742594	0.0510674	0.0586708	0.0599161	0.0711102	0.0400224	0.039504	0.0689926	0.0713696	0.0474525	0.0485499	0.0618393	0.0742625	0.0549949	0.0338893	0.0514939	0.0569357	0.0519865	0.0613426	0.0701763	0.0662007	0.0414115	0.0430409	0.0608802	0.0604157	0.0708767	0.0480359	0.073864	0
Otu0000545	0.0290673	0.0421197	0.0339166	0.0245932	0.0288379	0.0334178	0.016883	0.0167379	0.0288035	0.0201927	0.0139295	0.0258206	0.0458839	0.0268204	0.0166067	0.0278768	0.0316359	0.0239195	0.0221803	0.0125818	0.0217066	0.0180238	0.0174764	0.0167765	0.0198447	0.0328184	0.0180344	0.0235798	0.0154777	0.0174825	0.0306631	0.029649	0.023207	0.0174151	0.018485	0.0347024	0.0232554	0.0209945	0.0266204	0.0283168	0.0233649	0.0220274	0.028284	0.0409367	0.0231593	0.0150613	0.0222388	0.026591	0.013141
Otu0000546	0.0557777	0.0528945	0.0561744	0.051997	0.0469646	0.0299001	0.0474834	0.0403678	0.0460856	0.0504818	0.0504945	0.0408133	0.0422852	0.0473302	0.0398561	0.0338504	0.0413701	0.043679	0.0471332	0.0534726	0.0502679	0.0440582	0.0499326	0.0347513	0.0562267	0.0520291	0.0386452	0.0532728	0.0429937	0.0705544	0.0434394	0.0381201	0.0482706	0.0540783	0.0431318	0.0470162	0.0392937	0.0399896	0.0462963	0.0554023	0.0574388	0.0414115	0.0381219	0.0640292	0.0513533	0.0469558	0.0560418	0.0398865	0.0057492
Otu0000547	0.0188544	0.0274268	0.0158984	0.0274038	0.0370773	0.0334178	0.0306004	0.0226454	0.0201625	0.0235582	0.0272786	0.0308182	0.0197931	0.0236651	0.0243565	0.0179208	0.0304192	0.0197596	0.0221803	0.0235908	0.0422707	0.0370489	0.0312079	0.0239664	0.0248059	0.0344193	0.0317749	0.0288197	0.0240765	0.01998	0.0247008	0.0288018	0.0287767	0.0256643	0.0225928	0.0358218	0.0312746	0.0329914	0.0243056	0.0357037	0.0282326	0.0449359	0.0295138	0.0283408	0.0342355	0.0318945	0.025797	0.0280683	0.0188902
Otu0000548	0.0377089	0.0254677	0.0307369	0.0161612	0.0354294	0.0342972	0.0221589	0.0127996	0.024963	0.0224364	0.0261178	0.0258206	0.031489	0.0315535	0.0177138	0.0219032	0.0243353	0.0280794	0.0332705	0.0330272	0.0399858	0.0300397	0.0274629	0.0383463	0.0347283	0.0320179	0.0317749	0.0227064	0.0171975	0.024975	0.0340701	0.0220249	0.0334181	0.0311638	0.0256737	0.0223886	0.0304726	0.0439886	0.0243056	0.0443219	0.0292062	0.0299573	0.033203	0.0482843	0.0352425	0.0345524	0.0382508	0.0325001	0.00985578
Otu0000549	0.0455649	0.0548536	0.0551145	0.0808061	0.0428449	0.0694738	0.0643664	0.072859	0.048966	0.0875018	0.0481729	0.100784	0.0449843	0.0465413	0.0564628	0.0557536	0.0328527	0.0519988	0.0378914	0.028309	0.06055	0.0650859	0.0349528	0.040743	0.0562267	0.0680381	0.0480918	0.0899524	0.0361147	0.034965	0.0536604	0.0914882	0.0417726	0.0403296	0.0677785	0.101868	0.0489166	0.053986	0.0405093	0.0504777	0.0584124	0.0396493	0.0442706	0.0598306	0.0392702	0.0407541	0.0409194	0.0531821	0.0123197
Otu0000550	0.0290673	0.0391811	0.0349765	0.0295118	0.0346055	0.0369354	0.0348211	0.0255991	0.0364844	0.0448727	0.0412082	0.0383145	0.0251912	0.0457525	0.0409632	0.0209076	0.0425868	0.0478389	0.0471332	0.0298817	0.0456981	0.0300397	0.0362011	0.0347513	0.0372088	0.05363	0.0412215	0.0471595	0.0395542	0.0387113	0.0494016	0.0550623	0.0380595	0.0320804	0.0369701	0.041419	0.0392937	0.045988	0.0439815	0.0443219	0.0321268	0.0748932	0.028284	0.0440857	0.0382633	0.0416401	0.0471463	0.0339774	0.0057492
Otu0000551	0.0400657	0.0597512	0.0392161	0.0316198	0.0362534	0.0307795	0.0390419	0.0265837	0.0393648	0.0291673	0.036565	0.0583047	0.0422852	0.0370753	0.0409632	0.0477888	0.0401533	0.0249594	0.0443607	0.0676271	0.0342736	0.0340449	0.0461876	0.0251648	0.0405163	0.0416233	0.0721377	0.0384263	0.0464332	0.0437063	0.0434394	0.0389672	0.0213505	0.028414	0.0236198	0.0291052	0.0256612	0.0279927	0.0439815	0.0246233	0.0662007	0.0361249	0.056568	0.0398871	0.0292009	0.0318945	0.0346926	0.0650003	0.0854167
Otu0000552	0.0180688	0.0274268	0.0158984	0.0274038	0.028014	0.0325383	0.0274348	0.0315066	0.0336041	0.0168273	0.0325022	0.0174914	0.0197931	0.0205097	0.0309992	0.0179208	0.0255521	0.0322393	0.036043	0.0314545	0.0217066	0.0320423	0.0324562	0.0347513	0.0190179	0.0272152	0.0249047	0.0261997	0.0369746	0.0368382	0.0366254	0.0304961	0.0408444	0.0229145	0.0328623	0.0369413	0.0304726	0.0359906	0.037037	0.0307791	0.0350474	0.0246707	0.0455004	0.0283408	0.0302078	0.0239209	0.0311344	0.0295456	0.0147837
Otu0000553	0.0439937	0.0205701	0.0190781	0.0309171	0.042021	0.01495	0.0263797	0.0167379	0.0259232	0.0179491	0.0266982	0.0124939	0.0395861	0.0331311	0.0166067	0.0318592	0.0316359	0.0332793	0.0314221	0.00786361	0.0411283	0.025033	0.0349528	0.0311564	0.0281133	0.0152085	0.0317749	0.0279464	0.027516	0.0355894	0.0187386	0.0194836	0.0352747	0.0293306	0.0400509	0.0223886	0.0312746	0.0179953	0.03125	0.0196986	0.0340739	0.0211463	0.0270543	0.0178442	0.0382633	0.0177192	0.0409194	0.0310229	0.028746
Otu0000554	0.0180688	0.0235087	0.0190781	0.0147559	0.0230703	0.0246236	0.0200485	0.0137841	0.0105613	0.0157055	0.0156707	0.0116609	0.0215924	0.0141991	0.0154996	0.0159296	0.020685	0.00831981	0.020332	0.0141545	0.012567	0.0150198	0.0124831	0.0119832	0.00826863	0.0288161	0.0171756	0.0122265	0.0171975	0.0193556	0.0144798	0.00762402	0.0129959	0.0302472	0.0154042	0.0190303	0.0152363	0.0129966	0.0138889	0.014774	0.0214179	0.0176219	0.0147569	0.0157449	0.00906235	0.00974555	0.0142328	0.0073864	0.0845954
Otu0000555	0.01964	0.0235087	0.0105989	0.0231878	0.0304858	0.0219854	0.0411523	0.011815	0.0345642	0.0302891	0.0354042	0.0208231	0.0188934	0.0228763	0.0309992	0.0288724	0.0255521	0.0311993	0.0351189	0.0173	0.0274189	0.0270357	0.0337045	0.0251648	0.036382	0.0184103	0.0214695	0.0218331	0.0189172	0.0287213	0.0247008	0.0271076	0.0306333	0.0293306	0.0225928	0.0380607	0.0352841	0.0159958	0.0185185	0.0123116	0.037968	0.0202652	0.0270543	0.0283408	0.0312148	0.0177192	0.0240179	0.0295456	0.0271034
Otu0000556	0.000785601	0.000979528	0.0614739	0.00140532	0.00247182	0.0316589	0.0538145	0.00393833	0.00192023	0.0471164	0.00116079	0.0466437	0.0251912	0.00236651	0.0365347	0.0368372	0.0036503	0.00207995	0.00092418	0.00314545	0	0	0.0124831	0	0.0248059	0.0368206	0.0377864	0	0.00171975	0.03996	0.0408841	0.052521	0.0389878	0.0421628	0.0277276	0.049255	0.0336803	0.0169956	0.0219907	0.0369349	0.0350474	0.0387682	0.00122974	0.0398871	0.042291	0.00177192	0.00177911	0.0413638	0.000821315
Otu0000557	0.0502785	0.0303654	0.040276	0.0512943	0.028014	0.036056	0.0369315	0.0472599	0.0316839	0.0302891	0.039467	0.0416462	0.0350877	0.0410195	0.0343205	0.0358416	0.0194683	0.0405591	0.0351189	0.0361726	0.0297038	0.0390515	0.0424427	0.0443379	0.0264596	0.0400224	0.0360688	0.0392996	0.0309555	0.0511988	0.0349219	0.0304961	0.0389878	0.0439959	0.0431318	0.0347024	0.0312746	0.0259932	0.0393519	0.0270856	0.0369945	0.0326006	0.0319732	0.043036	0.0322217	0.0372103	0.0551523	0.0546593	0.0057492
Otu0000558	0.0141408	0.0127339	0.00211979	0.0126479	0.013183	0.0167089	0.016883	0.0127996	0.0230428	0	0.0150903	0.00166585	0.000899685	0	0.00442845	0	0.0121677	0	0.0184836	0.0173	0	0.00600793	0.00124832	0.0251648	0.0173641	0.0104058	0	0.0130999	0.000859875	0.0162338	0.0144798	0.00423557	0.0194939	0.000916582	0.0205389	0.0145526	0.0168401	0	0.0173611	0	0.0223914	0.0149786	0.0172164	0.0157449	0.014097	0.0150613	0.0240179	0.0162501	0.0386018
Otu0000559	0.0274961	0.0333039	0.0243776	0.0267011	0.0387252	0.025503	0.0358763	0.0246145	0.0374446	0.0314109	0.0266982	0.032484	0.0404858	0.0402307	0.0409632	0.0228988	0.0292024	0.0363992	0.025877	0.0393181	0.0456981	0.0350463	0.0262146	0.0179748	0.0429969	0.0280157	0.0377864	0.032313	0.0326752	0.0280969	0.0315148	0.0423557	0.0324898	0.0403296	0.0400509	0.0380607	0.0344822	0.0329914	0.0277778	0.0246233	0.0321268	0.045817	0.0258245	0.0272911	0.0503464	0.0416401	0.0311344	0.026591	0.044351
Otu0000560	0.011784	0.0264473	0.0275573	0.0140532	0.0173027	0.00967356	0.0274348	0.0216608	0.016322	0.00785273	0.0185727	0.0141597	0.0125956	0.0197209	0.019928	0.014934	0.0243353	0.0249594	0.0184836	0.0330272	0.00799717	0.0190251	0.0262146	0.0179748	0.0148835	0.0256143	0.0240459	0.0148465	0.0214969	0.0237263	0.0247008	0.0228721	0.0204222	0.0192482	0.0267006	0.0179109	0.0168401	0.0159958	0.0300926	0.0196986	0.0155766	0.0176219	0.0159866	0.00944693	0.0181247	0.0186051	0.0266866	0.0236365	0.0353165
Otu0000561	0.00471361	0.0176315	0.00953905	0.0252958	0.00247182	0.025503	0.016883	0.0157533	0	0.0179491	0.0139295	0.0283194	0.00179937	0.0276093	0.0243565	0.0228988	0.00121677	0.0187196	0.0147869	0.028309	0.00114245	0.0190251	0.0174764	0.0143799	0.000826863	0.0152085	0.0163169	0.0305664	0.00257962	0.0137363	0.0221456	0.0186365	0.00556969	0.0174151	0.0205389	0.0246275	0.00320765	0.0159958	0.0127315	0.0295479	0.00194708	0.0132164	0.0159866	0.0262415	0	0.0168332	0.0213493	0.0280683	0
Otu0000562	0.0447793	0.0284063	0.020138	0.0358357	0.0584998	0.0378148	0.0474834	0.0216608	0.0288035	0.0179491	0.0261178	0.0274865	0.0467836	0.0291869	0.0321063	0.0219032	0.0438036	0.0280794	0.0425123	0.0314545	0.0536953	0.059078	0.0386978	0.0275614	0.0380357	0.0344193	0.027481	0.0436662	0.0472931	0.03996	0.0289596	0.0406614	0.0649797	0.0375799	0.0338893	0.0347024	0.0425013	0.0299922	0.0428241	0.045553	0.0554917	0.0475792	0.028284	0.0293905	0.0644434	0.0327805	0.0533732	0.0443184	0.013141
Otu0000563	0.0369233	0.035263	0.0317968	0.0245932	0.0329576	0.0307795	0.0432626	0.0265837	0.0336041	0.0258018	0.0354042	0.0374816	0.0494827	0.043386	0.0453916	0.0169252	0.0425868	0.042639	0.0268012	0.0173	0.0159943	0.0260344	0.023718	0.0203715	0.0330745	0.0344193	0.0463742	0.0305664	0.0318154	0.0330919	0.0357736	0.0288018	0.0399161	0.0559115	0.039024	0.0369413	0.0304726	0.0339912	0.0381944	0.0258544	0.0408886	0.0255518	0.0442706	0.0314898	0.0463187	0.0310086	0.0391403	0.0251138	0.0303886
Otu0000564	0.0133552	0.00489764	0.0137786	0.00983726	0.0173027	0.00527649	0.0137174	0.0137841	0.0105613	0.0112182	0.0133491	0.0133268	0.0188934	0.0126214	0.0143925	0.0119472	0.0170347	0.0114397	0.0092418	0.0110091	0.0148519	0.0120159	0.00624157	0.00479329	0.0157104	0.0104058	0.0171756	0.00873324	0.0180574	0.0137363	0.0161833	0.0160951	0.0120677	0.0183316	0.0174581	0.0212692	0.0232554	0.0149961	0.0127315	0.00861814	0.0165502	0.00704877	0.00983792	0.0136456	0.0151039	0.0159473	0.0106746	0.0132955	0.0410657
Otu0000565	0.0597057	0.0626898	0.0169583	0.0534023	0.069211	0.0351766	0.0274348	0.0364295	0.0451255	0.0516036	0.0441101	0.0383145	0.0620783	0.0394418	0.048713	0.0507756	0.0073006	0.0519988	0.0249529	0.0393181	0.073117	0.0580767	0.0649124	0.0623128	0.0504387	0.0488273	0.0764316	0.0585127	0.0318154	0.0549451	0.0272561	0.052521	0.065908	0.061411	0.0729132	0.0436579	0.063351	0.049987	0.0416667	0.0517089	0.0447828	0.0431737	0.0209056	0.0577313	0.042291	0.0549295	0.0444777	0.0398865	0.00246394
Otu0000566	0	0	0	0.000702662	0.0148309	0.0184677	0.0179382	0.0157533	0	0.0145836	0.0214747	0.0158256	0.0152946	0.0141991	0	0	0.0377198	0	0.0110902	0.00157272	0	0.00700925	0	0.0143799	0.0157104	0.0112063	0	0.000873324	0.00171975	0.0156094	0	0.00847113	0	0	0.00205389	0.0100749	0.0168401	0	0	0.00738698	0.000973539	0.0114542	0.00122974	0.00104966	0.00100693	0	0.000889553	0	0.0706331
Otu0000567	0	0.000979528	0.0487552	0.16091	0	0.000879415	0.0358763	0.216608	0	0.00112182	0.0145099	0.138265	0	0	0.00774979	0.0238944	0	0.00207995	0.00092418	0.00943634	0	0.00200264	0.0137315	0.0203715	0	0	0.0661262	0.270731	0	0	0.0195903	0.218555	0	0	0.0205389	0.160079	0	0	0	0.00123116	0	0	0	0.00314898	0	0	0.000889553	0.00295456	0
Otu0000568	0.0251392	0.0391811	0.0339166	0.0463757	0.0296619	0.0316589	0.0432626	0.0413524	0.0240029	0.0314109	0.0383062	0.0408133	0.0467836	0.0244539	0.0298921	0.0278768	0.036503	0.0249594	0.0341947	0.0267363	0.0468405	0.0500661	0.0324562	0.0215698	0.0388626	0.0376211	0.0523857	0.0523995	0.0352549	0.0343407	0.0485499	0.0567566	0.0436292	0.039413	0.0421048	0.057091	0.0400956	0.0479875	0.0497685	0.0381661	0.0418622	0.0440548	0.0381219	0.0356884	0.0443048	0.0407541	0.0409194	0.0384093	0.0057492
Otu0000569	0	0	0	0.00210799	0.00164788	0	0	0	0.000960117	0.00336545	0	0	0	0.00157767	0	0.0019912	0.00121677	0	0	0	0	0	0	0.00119832	0	0	0.000858782	0.00436662	0	0.00374625	0.00255526	0	0	0.00366633	0	0.0033583	0.00160382	0.00199948	0	0	0.000973539	0	0	0.00104966	0.00201386	0	0	0	0.0410657
Otu0000570	0.0298529	0.0244882	0.0137786	0.0091346	0.0313097	0.0316589	0.0179382	0.0177225	0.0268833	0.0269236	0.0162511	0.0249877	0.031489	0.0323423	0.0188209	0.0139384	0.0304192	0.0218395	0.0138627	0.0173	0.0239915	0.0350463	0.019973	0.0119832	0.0305939	0.030417	0.0249047	0.0174665	0.020637	0.0274725	0.0306631	0.0186365	0.0213505	0.0192482	0.0236198	0.0223886	0.0328784	0.0329914	0.0243056	0.0344726	0.0272591	0.0220274	0.0258245	0.0283408	0.0292009	0.0186051	0.0213493	0.0295456	0.0123197
Otu0000571	0.0298529	0.0264473	0.0169583	0.0259985	0.0222464	0.0193471	0.0221589	0.0167379	0.0240029	0.02468	0.0243767	0.0174914	0.0269906	0.0189321	0.0221423	0.0258856	0.020685	0.0270394	0.0295738	0.0141545	0.0297038	0.0190251	0.0312079	0.0203715	0.0272865	0.0176099	0.0334925	0.0130999	0.0232166	0.0274725	0.0229973	0.0177894	0.023207	0.0238311	0.0215659	0.0268664	0.0304726	0.0099974	0.0243056	0.0246233	0.0214179	0.0140975	0.0184461	0.0209932	0.0221524	0.0248069	0.0284657	0.0280683	0.028746
Otu0000572	0.0636337	0.0548536	0.0561744	0.043565	0.0519082	0.0501266	0.0601456	0.0324912	0.0528064	0.0628218	0.0632632	0.0508084	0.0503824	0.0473302	0.0697481	0.0358416	0.0474539	0.0509589	0.056375	0.0550453	0.0616924	0.0550727	0.0499326	0.0347513	0.0719371	0.0512287	0.0601147	0.0523995	0.0601912	0.0749251	0.0570674	0.0432028	0.0454858	0.061411	0.0410779	0.057091	0.0505204	0.053986	0.0659722	0.0418595	0.0477034	0.0440548	0.0553383	0.0283408	0.0523602	0.0549295	0.0631583	0.063523	0.00739183
Otu0000573	0.0204256	0.0342835	0.0233177	0.0147559	0.0222464	0.0228648	0.0105519	0.02363	0.0182422	0.0168273	0.0232159	0.0241548	0.014395	0.0157767	0.0177138	0.0139384	0.0170347	0.0291193	0.0240287	0.0141545	0.0239915	0.0210278	0.019973	0.0143799	0.0214984	0.0272152	0.0171756	0.0261997	0.0171975	0.0255994	0.0221456	0.0186365	0.0129959	0.0256643	0.0277276	0.0212692	0.018444	0.0209945	0.0104167	0.0160051	0.0204443	0.0202652	0.0159866	0.0199435	0.0221524	0.0265788	0.0213493	0.0177274	0.0607773
Otu0000574	0.0251392	0.0303654	0.0275573	0.0189719	0.00247182	0.0193471	0.0189934	0.018707	0	0.01234	0.0203139	0.0183243	0.0242915	0.000788836	0.019928	0.0288724	0.00121677	0.0363992	0.0212561	0.0188727	0.0285613	0.0270357	0.00249663	0.0203715	0.0157104	0.0288161	0.0180344	0.00174665	0.0249364	0.0262238	0.0204421	0.0271076	0.0185656	0	0.019512	0.0190303	0	0.0219943	0.0219907	0.0307791	0.0272591	0.0229085	0.0356625	0.0272911	0.027187	0.022149	0.0186806	0.0251138	0.0410657
Otu0000575	0.0479217	0.0460378	0.0455755	0.0421597	0.0461407	0.046609	0.0327108	0.0285529	0.0374446	0.0224364	0.0464317	0.0274865	0.0413855	0.0496967	0.0354276	0.0278768	0.0669222	0.0395191	0.0471332	0.0204454	0.0548377	0.0330436	0.0399461	0.033553	0.0463043	0.0368206	0.0498094	0.0340596	0.0524524	0.0574426	0.0442911	0.0313432	0.046414	0.0339135	0.0349162	0.041419	0.0505204	0.0409893	0.0335648	0.0233921	0.0438093	0.0414115	0.0504193	0.0419864	0.0513533	0.0460699	0.0391403	0.0428411	0.0139624
Otu0000576	0.011784	0.00979528	0.0105989	0.0119452	0.00494364	0.00703532	0.0105519	0.0108304	0.00672082	0.0201927	0.00870595	0.0133268	0.00809717	0.00157767	0.00332134	0.00896039	0.00486707	0.00831981	0.0138627	0.00157272	0.00913962	0.0090119	0.00748989	0.00958658	0.0115761	0.00560314	0.00858782	0.0157198	0.00945862	0.00749251	0.017035	0.0144009	0.00835453	0.0128321	0.0143773	0.0145526	0.0128306	0.00399896	0.00578704	0.00369349	0	0.00352438	0.00491896	0.00839727	0.014097	0.00708767	0.00978508	0.0147728	0.0492789
Otu0000577	0.0306385	0.0215496	0.0190781	0.0274038	0.0379013	0.0290207	0.0242693	0.0354449	0.0268833	0.02468	0.0412082	0.0149926	0.0242915	0.0212986	0.0298921	0.019912	0.0243353	0.0530388	0.0369672	0.0204454	0.022849	0.0320423	0.0262146	0.033553	0.0264596	0.0224126	0.0120229	0.029693	0.0318154	0.0324675	0.0306631	0.0271076	0.0324898	0.0302472	0.0225928	0.0313441	0.0328784	0.0259932	0.0358796	0.0270856	0.037968	0.0211463	0.033203	0.0230925	0.0332286	0.0239209	0.041809	0.0325001	0.0197116
Otu0000578	0.0353521	0.0391811	0.0349765	0.0393491	0.0436688	0.0386942	0.02849	0.0403678	0.0422451	0.03702	0.039467	0.043312	0.0386865	0.0394418	0.0409632	0.0418152	0.0279856	0.045759	0.0415881	0.0235908	0.0445556	0.0340449	0.0524292	0.0359497	0.0405163	0.0328184	0.0506681	0.0288197	0.0498727	0.0518232	0.0434394	0.0415085	0.0473423	0.0375799	0.0410779	0.0380607	0.0376899	0.0529862	0.0300926	0.0344726	0.0438093	0.0220274	0.0430409	0.0419864	0.0483325	0.0363243	0.0462568	0.0561366	0.00492789
Otu0000579	0.00707041	0.0235087	0.029677	0.0358357	0.0230703	0.0272619	0.0327108	0.0295374	0.0192023	0.0302891	0.0226355	0.0366486	0.0251912	0.0189321	0.0254636	0.0278768	0.0267689	0.0291193	0.0295738	0.0393181	0.0434132	0.0290383	0.0249663	0.040743	0.0206716	0.0264148	0.0317749	0.0270731	0.0197771	0.02997	0.0332183	0.0321903	0.0259919	0.0192482	0.0246467	0.0324635	0.018444	0.0219943	0.0231481	0.0258544	0.0223914	0.0308384	0.028284	0.0304401	0.0120831	0.0292367	0.0329135	0.0384093	0.0205329
Otu0000580	0.0329953	0.0264473	0	0.0379437	0.0370773	0.0246236	0.0221589	0.0354449	0.0422451	0	0.0400474	0.00583047	0.0269906	0.048119	0	0.0338504	0.0389365	0.0187196	0.025877	0.0141545	0.0342736	0.0390515	0.0536775	0.0455362	0.0372088	0.0264148	0.0326337	0.0489062	0.0455734	0.0343407	0.000851752	0.037273	0.0501272	0.0339135	0.00102695	0.0548522	0.0473128	0.0369904	0.0358796	0.0196986	0.0438093	0.0220274	0.0356625	0.0367381	0.041284	0.0398682	0.033803	0.0354547	0
Otu0000581	0.0290673	0.0401606	0.0529947	0.0590236	0.0387252	0.0219854	0.0379867	0.0443062	0.0182422	0.0358982	0.0475925	0.05414	0.0458839	0.0283981	0.0453916	0.0736744	0.0219018	0.0363992	0.0554508	0.0613362	0.0331311	0.0270357	0.0411944	0.0443379	0.0314208	0.0400224	0.0249047	0.0331863	0.041274	0.0374625	0.0366254	0.0364259	0.036203	0.0421628	0.0564821	0.0223886	0.0264631	0.0489873	0.0439815	0.0418595	0.037968	0.0449359	0.0442706	0.0335891	0.0342355	0.0372103	0.0435881	0.0502275	0.00328526
Otu0000582	0.000785601	0	0	0	0	0	0	0	0	0	0	0	0	0	0	0	0.00121677	0	0	0.00314545	0	0	0.00374494	0	0	0	0	0	0	0	0.000851752	0.000847113	0	0	0	0	0	0	0	0	0	0	0	0	0.00402771	0	0	0	0
Otu0000583	0.0353521	0.0293858	0.0476953	0.0632396	0.0205985	0.0342972	0.0474834	0.0561211	0.0211226	0.0258018	0.0487533	0.0599705	0.0287899	0.0283981	0.0409632	0.0507756	0.020685	0.0311993	0.0499057	0.0393181	0.0308462	0.0360476	0.0386978	0.0431396	0.0198447	0.0336188	0.039504	0.0305664	0.0266561	0.0255994	0.0349219	0.0321903	0.0250636	0.0201648	0.0297815	0.0425384	0.0240574	0.0349909	0.0300926	0.0221609	0.0146031	0.0361249	0.0344327	0.0325394	0.0332286	0.0372103	0.0275761	0.0310229	0.00985578
Otu0000584	0.0227824	0.0235087	0.0286172	0.0274038	0.0247182	0.0263824	0.0295452	0.0443062	0.0259232	0.0235582	0.0284394	0.0449779	0.0179937	0.0283981	0.0309992	0.0358416	0.0316359	0.0145597	0.0314221	0.0393181	0.0285613	0.0300397	0.0399461	0.0383463	0.018191	0.0272152	0.0214695	0.0270731	0.0189172	0.0237263	0.0315148	0.0304961	0.0185656	0.0192482	0.018485	0.0391801	0.018444	0.0299922	0.025463	0.0344726	0.0243385	0.0193841	0.0172164	0.0367381	0.0352425	0.0380963	0.0329135	0.0339774	0.00657052
Otu0000585	0.0314241	0.0333039	0.0211979	0.0224852	0.02719	0.0299001	0.0158278	0.018707	0.0268833	0.0224364	0.0162511	0.0283194	0.0251912	0.0165656	0.0166067	0.0209076	0.036503	0.0218395	0.0166352	0.0204454	0.0377009	0.0330436	0.0224697	0.0263631	0.0264596	0.0240134	0.0326337	0.0218331	0.0171975	0.0231019	0.0264043	0.0228721	0.023207	0.028414	0.0225928	0.0302247	0.0200478	0.0219943	0.0185185	0.0332414	0.0243385	0.0211463	0.0172164	0.0283408	0.0261801	0.0274647	0.0284657	0.0251138	0.0106771
Otu0000586	0.0392801	0.0558331	0.0360364	0.0393491	0.0321337	0.0342972	0.0369315	0.0246145	0.041285	0.03702	0.0313414	0.0383145	0.0512821	0.0347088	0.0431774	0.0358416	0.0292024	0.0270394	0.0286496	0.0314545	0.0262764	0.0380502	0.0187247	0.0239664	0.0355551	0.0256143	0.0412215	0.0288197	0.0266561	0.0305944	0.0272561	0.0279547	0.0324898	0.0531617	0.0318354	0.0246275	0.0416994	0.0369904	0.0439815	0.045553	0.0438093	0.0334817	0.0467301	0.0283408	0.0261801	0.0318945	0.0400299	0.0339774	0.0303886
Otu0000587	0.0102128	0.0244882	0.0180182	0.0112426	0.0189506	0.0219854	0.00949668	0.0167379	0.0124815	0.0168273	0.0121883	0.0149926	0.0161943	0.0141991	0.00885691	0.0129428	0.00973414	0.0155997	0.0147869	0.0314545	0.0194217	0.0200264	0.0174764	0.0131815	0.0148835	0.0184103	0.0111642	0.0218331	0.0189172	0.0187313	0.017035	0.0118596	0.0129959	0.0146653	0.018485	0.0179109	0.018444	0.0099974	0.025463	0.0110805	0.0175237	0.0264329	0.0159866	0.0115463	0.0191316	0.00974555	0.016012	0.0192046	0.0172476
Otu0000588	0.0526353	0.0440788	0.0466354	0.0639422	0.0510843	0.0430913	0.0612008	0.0521828	0.057607	0.0549691	0.0470121	0.0399803	0.0683761	0.0552185	0.0464988	0.0418152	0.0535378	0.0363992	0.0572992	0.0534726	0.0514104	0.0520687	0.0599191	0.040743	0.0487849	0.0672377	0.047233	0.0550194	0.061911	0.0580669	0.0587709	0.0703104	0.0751908	0.0632441	0.0472396	0.0548522	0.0553319	0.0619839	0.0578704	0.0554023	0.0515976	0.0607956	0.061487	0.0451354	0.0765265	0.0496137	0.057821	0.036932	0.00985578
Otu0000589	0.0227824	0.0450583	0.040276	0.0309171	0.0247182	0.0378148	0.0411523	0.0324912	0.0268833	0.0358982	0.0168315	0.0308182	0.031489	0.0315535	0.0298921	0.0258856	0.0231186	0.0374392	0.025877	0.0157272	0.0365585	0.0400529	0.0262146	0.0239664	0.0256328	0.0400224	0.0326337	0.0419196	0.0180574	0.0274725	0.0323666	0.0381201	0.0250636	0.0384964	0.0410779	0.0223886	0.0224535	0.049987	0.0335648	0.05294	0.0214179	0.0317195	0.0356625	0.0346388	0.0292009	0.0504997	0.033803	0.0354547	0.00492789
Otu0000590	0.0227824	0.00979528	0.0190781	0.00421597	0.0115352	0.00527649	0.0179382	0.011815	0.0172821	0.00785273	0.0116079	0.0116609	0.0197931	0.0157767	0.0121782	0.0069692	0.0182515	0.0166396	0.0184836	0.00629089	0.012567	0.00700925	0.0149798	0.00718993	0.0148835	0.0136076	0.00772904	0.00785992	0.020637	0.0143606	0.0119245	0.0110125	0.0111394	0.0174151	0.0164312	0.00895546	0.0136325	0.0109971	0.0162037	0.00369349	0.00876185	0.0123353	0.0209056	0.0136456	0.014097	0.0168332	0.0177911	0.0162501	0.0804888
Otu0000591	0.0188544	0.0342835	0.040276	0.0203772	0.0181267	0.0246236	0.0221589	0.0216608	0.0211226	0.02468	0.027859	0.0316511	0.0233918	0.0205097	0.0254636	0.0159296	0.0194683	0.0239195	0.0268012	0.0251636	0.022849	0.0290383	0.0212214	0.0251648	0.023979	0.0240134	0.039504	0.0314397	0.0197771	0.0168581	0.0315148	0.0355787	0.0185656	0.0274975	0.0123234	0.0291052	0.0200478	0.0189951	0.0300926	0.0283168	0.0262856	0.0281951	0.0221353	0.0314898	0.0231593	0.0239209	0.0249075	0.0206819	0.0180689
Otu0000592	0.0133552	0.0244882	0.020138	0.0330251	0.0156549	0.0316589	0.0232141	0.0502137	0.00768093	0.0134618	0.0203139	0.0483096	0.017094	0.0228763	0.019928	0.0179208	0.0133844	0.0239195	0.0157111	0.0581907	0.0114245	0.00100132	0.0212214	0.0251648	0.0157104	0.0168094	0.0188932	0.034933	0.020637	0.01998	0.0221456	0.0245663	0.00928281	0.0192482	0.0256737	0.0223886	0.0144344	0.0389899	0.0115741	0.0209298	0.0184972	0.0361249	0.00983792	0.0146952	0.0100693	0	0.0177911	0.0251138	0.0246394
Otu0000593	0.00549921	0.00293858	0.00423958	0.00421597	0.0115352	0.00263824	0.00844149	0.00196916	0.0134416	0	0.00290198	0.00583047	0.00179937	0.000788836	0.00221423	0.0039824	0.00851737	0.00311993	0.0092418	0.00157272	0.0102821	0.00700925	0.00624157	0.00599161	0	0.0016009	0	0.00785992	0.0120382	0.00999001	0	0.0067769	0.0157808	0.00274975	0	0.00111943	0.00320765	0.00099974	0.00578704	0.00369349	0.00389416	0.00352438	0.00368922	0	0.00906235	0.00708767	0.00533732	0	0.0394231
Otu0000594	0.00314241	0.00195906	0.00317968	0.0379437	0.00247182	0.000879415	0	0.0364295	0.0633677	0.0504818	0.00232159	0.043312	0.00269906	0.0583739	0.00110711	0.0995599	0.00121677	0.00207995	0.00277254	0.0927906	0.0022849	0.00400529	0.00124832	0.00119832	0.00413432	0.0488273	0.00171756	0.00174665	0.055032	0.00187313	0.000851752	0.0559095	0.0640514	0	0.00410779	0.0436579	0.00160382	0.00399896	0.00347222	0.00246233	0.0048677	0.00264329	0.00122974	0.0052483	0	0.000885959	0.00978508	0.0812504	0
Otu0000595	0.0707041	0.0244882	0.0392161	0.0252958	0.0593237	0.0228648	0.0295452	0.0393833	0.0681683	0.0482382	0.0371454	0.0283194	0.0620783	0.0331311	0.0254636	0.029868	0.088824	0.0415991	0.0425123	0.0188727	0.0594075	0.0420555	0.0486843	0.0419413	0.0678028	0.023213	0.0386452	0.034933	0.0524524	0.0374625	0.0494016	0.0330374	0.0677645	0.0366633	0.037997	0.0291052	0.0745778	0.0259932	0.0486111	0.0246233	0.0671742	0.0220274	0.0577978	0.0335891	0.069478	0.042526	0.0507045	0.036932	0.0238181
Otu0000596	0.0172832	0.0430992	0.0625338	0.051997	0.0238943	0.0281413	0.0348211	0.0472599	0.00864105	0.0347764	0.0348238	0.0533071	0.0179937	0.0276093	0.0420703	0.0587404	0.0170347	0.0353592	0.0425123	0.0786361	0.0182792	0.0320423	0.0549258	0.0718993	0.0214984	0.0312175	0.0309161	0.0270731	0.00859875	0.0268482	0.0281078	0.0220249	0.0167091	0.0192482	0.0225928	0.0179109	0.0152363	0.0309919	0.0300926	0.0406284	0.0155766	0.0343627	0.0270543	0.0272911	0.0151039	0.0301226	0.0355821	0.0206819	0.00657052
Otu0000597	0.0675617	0.051915	0.0519348	0.0470783	0.0576758	0.0562825	0.0316556	0.0413524	0.0499261	0.0516036	0.0400474	0.0424791	0.065677	0.052852	0.0431774	0.04978	0.0438036	0.0571987	0.0351189	0.0613362	0.0571226	0.0500661	0.0424427	0.0467346	0.0653222	0.0632354	0.0635499	0.0454129	0.0610511	0.0443307	0.0476981	0.0499797	0.0742625	0.0577447	0.0605899	0.0358218	0.0392937	0.072981	0.0601852	0.060327	0.0652271	0.0757743	0.0430409	0.0503837	0.0473256	0.0531576	0.0515941	0.0487502	0.0057492
Otu0000598	0.0141408	0.0127339	0.0137786	0.0168639	0.0173027	0.025503	0.0158278	0.0206762	0.016322	0.0224364	0.0156707	0.0158256	0.0188934	0.0228763	0.0188209	0.0228988	0.0182515	0.0197596	0.0184836	0.0377453	0.0205641	0.0180238	0.0224697	0.0215698	0.0223253	0.0240134	0.00858782	0.0165932	0.0214969	0.0193556	0.0153315	0.0245663	0.0111394	0.0238311	0.0164312	0.0201498	0.0144344	0.0299922	0.0162037	0.0332414	0.0184972	0.0246707	0.0270543	0.0209932	0.0191316	0.0194911	0.0240179	0.0295456	0.0106771
Otu0000599	0.0479217	0.0479969	0.0328567	0.0302145	0.0453167	0.025503	0.0306004	0.0226454	0.0518463	0.03702	0.0272786	0.0241548	0.034188	0.0362865	0.038749	0.0338504	0.0316359	0.0249594	0.0277254	0.0173	0.0365585	0.0430568	0.019973	0.0179748	0.0330745	0.0424238	0	0.0200865	0.0335351	0.0368382	0.0476981	0.0364259	0.0612665	0.0421628	0.0277276	0.0268664	0.0441051	0.0279927	0.0451389	0	0.048677	0.0414115	0	0.043036	0.0523602	0.0389822	0.033803	0	0.0566707
Otu0000600	0.023568	0.0421197	0.0307369	0.0259985	0.0304858	0.0246236	0.0295452	0.0216608	0.0268833	0.0145836	0.0388866	0.0358157	0.0233918	0.0220874	0.0453916	0.0169252	0.0389365	0.0415991	0.0397398	0.0330272	0.0365585	0.025033	0.0212214	0.0239664	0.0214984	0.0280157	0.0317749	0.0314397	0.0369746	0.0330919	0.0349219	0.0228721	0.0148525	0.0174151	0.0359431	0.0179109	0.0400956	0.0199948	0.0428241	0.0233921	0.0233649	0.0149786	0.0295138	0.0220428	0.0392702	0.0345524	0.0302448	0.0251138	0.0279247
Otu0000601	0.0400657	0.0303654	0.0275573	0.0309171	0.0181267	0.0386942	0.0295452	0.0334758	0.0384047	0.0381418	0.0406278	0.021656	0.0152946	0.043386	0.0243565	0.029868	0.0328527	0.0395191	0.036043	0.0110091	0.0342736	0.0300397	0.0461876	0.037148	0.0297671	0.0360202	0.0334925	0.0305664	0.0257962	0.0380869	0.0255526	0.0347316	0.0389878	0.0329969	0.0328623	0.0369413	0.0481147	0.0369904	0.0300926	0.0307791	0.0292062	0.0493414	0.0405814	0.0262415	0.0191316	0.0327805	0.0329135	0.0354547	0.015605
Otu0000602	0.0204256	0.0235087	0.0169583	0.0161612	0.0181267	0.0219854	0.0211037	0.0216608	0.0182422	0.0190709	0.0261178	0.0241548	0.0215924	0.0181432	0.0154996	0.0169252	0.0352862	0.0270394	0.0194078	0.0173	0.00685471	0.025033	0.0274629	0.0167765	0.0223253	0.0264148	0.0145993	0.0192131	0.0266561	0.014985	0.0195903	0.0194836	0.0148525	0.0183316	0.0154042	0.0190303	0.0264631	0.0139964	0.0173611	0.0196986	0.0204443	0.0167408	0.0233651	0.0220428	0.0181247	0.0203771	0.0249075	0.0162501	0.0435297
Otu0000603	0.0746321	0.0509354	0.0381562	0.0505916	0.0708589	0.0712326	0.0517041	0.0403678	0.0547267	0.0560909	0.0487533	0.0483096	0.0602789	0.0757283	0.0409632	0.0418152	0.0644887	0.0540788	0.0369672	0.0518998	0.0468405	0.0380502	0.047436	0.0311564	0.0454775	0.062435	0.0506681	0.0523995	0.0722295	0.044955	0.0485499	0.0609921	0.076119	0.0604944	0.0441587	0.0682854	0.0489166	0.049987	0.0451389	0.0590958	0.0545182	0.0493414	0.0516491	0.0566816	0.0594087	0.0522716	0.0462568	0.0457957	0.00903446
Otu0000604	0.0306385	0.035263	0.0349765	0.0344304	0.0362534	0.0554031	0.0316556	0.0334758	0.0393648	0.0269236	0.0429493	0.0249877	0.0260909	0.0331311	0.0476059	0.0238944	0.0559713	0.0415991	0.0443607	0.0235908	0.0342736	0.0340449	0.0411944	0.0215698	0.036382	0.0336188	0.0223283	0.0209598	0.0558919	0.03996	0.0374771	0.0279547	0.0259919	0.0201648	0.0318354	0.0425384	0.045709	0.0309919	0.0439815	0.014774	0.0292062	0.0326006	0.033203	0.0314898	0.0352425	0.0248069	0.033803	0.0236365	0.0188902
Otu0000605	0.0298529	0.0411402	0.0466354	0.0505916	0.0568519	0.0307795	0.045373	0.0354449	0.0614475	0.0459945	0.0533965	0.0241548	0.0287899	0.0244539	0.0453916	0.029868	0.0486707	0.0270394	0.0572992	0.0330272	0.0422707	0.0500661	0.0337045	0.0383463	0.0471312	0.0320179	0.0420803	0.034933	0.0464332	0.0555694	0.0451429	0.029649	0.0427009	0.0485788	0.0369701	0.033583	0.0497185	0.0319917	0.0451389	0.0332414	0.0262856	0.0299573	0.0430409	0.0304401	0.0453117	0.0345524	0.0435881	0.0280683	0.0106771
Otu0000606	0.000785601	0.0783622	0.00105989	0.000702662	0.00247182	0.00175883	0.00105519	0.0561211	0.00288035	0	0.00174119	0.00166585	0.00539811	0.00236651	0.0642126	0.0019912	0.00121677	0.00207995	0	0.0503271	0.0022849	0.00100132	0	0	0.00165373	0.00400224	0.000858782	0.0034933	0.000859875	0.00374625	0.00340701	0.00169423	0	0.00183316	0	0.00111943	0.000801912	0.00099974	0	0.00123116	0.00194708	0.06432	0.00491896	0.00104966	0.00100693	0.065561	0.00177911	0	0.146194
Otu0000607	0.0377089	0.0284063	0.029677	0.0133506	0.0354294	0.0228648	0.0263797	0.0177225	0.0451255	0.0415073	0.0249571	0.0249877	0.0332883	0.0212986	0.0287849	0.0189164	0.0352862	0.0301593	0.0268012	0.0298817	0.0297038	0.031041	0.0187247	0.0191732	0.0496118	0.0416233	0.0360688	0.0122265	0.0300956	0.0324675	0.0187386	0.0186365	0.0259919	0.028414	0.0174581	0.0179109	0.0328784	0.0439886	0.025463	0.0184674	0.0428357	0.0317195	0.0258245	0.0188939	0.0392702	0.0248069	0.0204597	0.010341	0.0517428
Otu0000608	0.0636337	0.0401606	0.0667734	0.0330251	0.0782743	0.0536443	0.0464282	0.0374141	0.041285	0.0358982	0.0493337	0.0366486	0.0764732	0.0220874	0.0332134	0.0268812	0.0535378	0.0561587	0.0388156	0.0345999	0.06055	0.0490648	0.0549258	0.0323547	0.0694565	0.0488273	0.0360688	0.0567661	0.0722295	0.0393357	0.0383289	0.0550623	0.0677645	0.0265809	0.0431318	0.0503745	0.0617472	0.0619839	0.037037	0.075101	0.0603594	0.0422926	0.0233651	0.0671782	0.0573949	0.0504997	0.0293553	0.063523	0.0180689
Otu0000609	0.0549921	0.051915	0.0264974	0.0161612	0.0560279	0.036056	0.02849	0.0167379	0.0604874	0.0314109	0.0284394	0.0249877	0.0476833	0.0441748	0.0254636	0.0318592	0.0620551	0.0488789	0.036043	0.0251636	0.0502679	0.0370489	0.0312079	0.0299581	0.0504387	0.0472264	0.0343513	0.0244531	0.0404141	0.034965	0.0340701	0.0237192	0.0408444	0.0439959	0.0256737	0.0279858	0.0489166	0.0479875	0.0324074	0.0196986	0.0623065	0.0361249	0.0455004	0.0241422	0.0704849	0.0345524	0.0471463	0.0236365	0.0271034
Otu0000610	0.0109984	0.0205701	0.0158984	0.0182692	0.0247182	0.0290207	0.0158278	0.0216608	0.024963	0.0213145	0.0214747	0.0224889	0.017094	0.0244539	0.0243565	0.0129428	0.0231186	0.0145597	0.0194078	0.00786361	0.0262764	0.0190251	0.019973	0.0179748	0.0165373	0.0216121	0.0145993	0.0209598	0.0266561	0.0193556	0.0161833	0.0160951	0.023207	0.0201648	0.0123234	0.0134332	0.0176421	0.026993	0.0196759	0.0209298	0.0204443	0.0176219	0.0184461	0.0146952	0.0221524	0.0177192	0.0186806	0.0251138	0.0476363
Otu0000611	0.0573489	0.000979528	0.0487552	0.0625369	0.0346055	0.0395737	0.0411523	0.000984581	0.0384047	0.0415073	0.0690672	0.0383145	0.0602789	0.0347088	0.00221423	0.0607316	0.0352862	0.042639	0.0378914	0	0.0365585	0.0861137	0.0449393	0.0275614	0.0446506	0.000800448	0.0326337	0.0358063	0.0404141	0.0505744	0.0459946	0.0321903	0.0566251	0.00183316	0.0287545	0.0358218	0.0384918	0.0199948	0.0277778	0.0270856	0.0564653	0	0.0528788	0.0377877	0.0312148	0.00265788	0.0391403	0.0325001	0.00246394
Otu0000612	0.0298529	0.0225291	0.0254375	0.0182692	0.0222464	0.0184677	0.0126622	0.00984582	0.024963	0.0201927	0.0150903	0.0124939	0.0287899	0.0370753	0.0243565	0.0507756	0.0182515	0.0176796	0.0268012	0.0377453	0.0319887	0.0240317	0.0374494	0.0191732	0.0264596	0.0280157	0.0188932	0.0148465	0.0197771	0.0274725	0.0187386	0.0237192	0.0222787	0.0256643	0.0338893	0.0167915	0.0280669	0.026993	0.0243056	0.0320102	0.0340739	0.0220274	0.0381219	0.0514333	0.0332286	0.0345524	0.0240179	0.0280683	0.00328526
Otu0000613	0.0298529	0.0411402	0.0328567	0.0400517	0.0428449	0.0316589	0.0422075	0.0295374	0.0355243	0.0426291	0.0435297	0.0449779	0.0278902	0.0205097	0.0365347	0.034846	0.0194683	0.0322393	0.0415881	0.0314545	0.035416	0.0350463	0.0374494	0.0347513	0.0512655	0.0216121	0.0463742	0.0506528	0.034395	0.0330919	0.0315148	0.0660748	0.0287767	0.0229145	0.0338893	0.0402996	0.0304726	0.0319917	0.0543981	0.0381661	0.0204443	0.0264329	0.0479599	0.0440857	0.0292009	0.0230349	0.0329135	0.0398865	0.00739183
Otu0000614	0.0251392	0.0372221	0.0286172	0.0259985	0.0197746	0.0263824	0.0379867	0.0265837	0.0220827	0.0291673	0.0296002	0.0349828	0.0296896	0.0260316	0.0365347	0.0338504	0.0243353	0.0363992	0.036043	0.0298817	0.025134	0.0330436	0.0337045	0.0383463	0.0330745	0.0328184	0.0334925	0.0340596	0.0214969	0.0293457	0.0298113	0.044897	0.0287767	0.0329969	0.0369701	0.0223886	0.027265	0.0369904	0.0289352	0.0664828	0.0340739	0.0519847	0.0405814	0.0346388	0.0342355	0.0248069	0.0453672	0.0443184	0.0057492
Otu0000615	0.00314241	0.0107748	0.0222578	0.0140532	0.0148309	0.00967356	0.0200485	0.0127996	0.0115214	0.00785273	0.0150903	0.00916216	0.00539811	0.0126214	0.0132854	0.0059736	0.0219018	0.0124797	0.0157111	0.00314545	0.00342736	0.0090119	0.0087382	0.0131815	0.0165373	0.0016009	0.0103054	0.0209598	0.006879	0.00999001	0.013628	0.0118596	0.00649797	0.0128321	0.00924252	0.00895546	0.0120287	0.00899766	0.0173611	0.00738698	0.012656	0.00616767	0.0110677	0.00629796	0.00704849	0.0044298	0.0142328	0.00590912	0.0295673
Otu0000616	0.0377089	0.0254677	0.020138	0.0288091	0.0304858	0.0395737	0.0263797	0.0265837	0.0211226	0.0325327	0.0290198	0.0274865	0.0260909	0.0276093	0.0309992	0.0219032	0.036503	0.0343192	0.0166352	0.0267363	0.022849	0.031041	0.0287112	0.0227681	0.0289402	0.0208117	0.0257635	0.032313	0.0300956	0.0324675	0.0332183	0.0279547	0.0380595	0.0302472	0.0174581	0.0324635	0.0312746	0.0379901	0.0393519	0.0332414	0.0564653	0.0334817	0.0295138	0.0356884	0.0292009	0.0380963	0.0382508	0.0192046	0.00657052
Otu0000617	0.0164976	0.018611	0.0243776	0.0288091	0.014007	0.00703532	0.0253245	0.0216608	0.0240029	0.0179491	0.0220551	0.0116609	0.0179937	0.0086772	0.019928	0.0139384	0.00851737	0.0155997	0.0184836	0.00629089	0.00913962	0.0200264	0.0162281	0.0179748	0.0107492	0.0120067	0.0249047	0.0261997	0.0111784	0.0212288	0.0306631	0.0169423	0.0129959	0.0183316	0.0359431	0.0291052	0.0136325	0.00799792	0.0127315	0.00984931	0.00973539	0.00528658	0.00983792	0.0188939	0.0100693	0.0141753	0.0151224	0.0221592	0.0632412
Otu0000618	0.0322097	0.0264473	0.0254375	0.0224852	0.0395491	0.0404531	0.0221589	0.018707	0.0422451	0.0201927	0.0261178	0.0191572	0.0359874	0.0283981	0.0276778	0.0258856	0.0267689	0.0332793	0.0249529	0.0188727	0.035416	0.0260344	0.0249663	0.0239664	0.0272865	0.030417	0.0291986	0.029693	0.0386944	0.0287213	0.0315148	0.0330374	0.0334181	0.0238311	0.0277276	0.0380607	0.0465109	0.0349909	0.0428241	0.0430907	0.0262856	0.0326006	0.0356625	0.0314898	0.0352425	0.0380963	0.0231284	0.026591	0.00739183
Otu0000619	0.00785601	0.0195906	0.0116588	0.0288091	0.0197746	0.0158295	0.0158278	0.0127996	0.024963	0.0134618	0.0284394	0.0224889	0.0107962	0.0220874	0.0243565	0.0109516	0.0194683	0.0197596	0.0231045	0.0204454	0.0262764	0.0120159	0.0312079	0.0287597	0.0066149	0.0104058	0.0171756	0.029693	0.020637	0.0268482	0.0255526	0.0271076	0.036203	0.0302472	0.037997	0.0380607	0.0376899	0.0159958	0.0219907	0.014774	0.0262856	0.0149786	0.0122974	0.0146952	0.0110762	0.0141753	0.0284657	0.0192046	0.0238181
Otu0000620	0.00864162	0.0156724	0.0148385	0.0182692	0.0197746	0.00791473	0.0147726	0.0127996	0.0153619	0.0179491	0.0116079	0.0133268	0.014395	0.00552185	0.0132854	0.00896039	0.0219018	0.0103998	0.0212561	0.0188727	0.0159943	0.0090119	0.00499326	0.00838826	0.0165373	0.0104058	0.0188932	0.0139732	0.0249364	0.0193556	0.0195903	0.0160951	0.0102111	0.021998	0.0174581	0.0201498	0.0160382	0.0169956	0.0196759	0.00246233	0.0116825	0.0140975	0.00983792	0.0178442	0.014097	0.0106315	0.0151224	0.0073864	0.0501002
Otu0000621	0.0290673	0.0342835	0.049815	0.0548076	0.0288379	0.0246236	0.079139	0.0452907	0.0355243	0.0426291	0.0609416	0.0483096	0.0287899	0.0197209	0.0298921	0.029868	0.0377198	0.046799	0.036043	0.0251636	0.0388434	0.0380502	0.0536775	0.033553	0.0388626	0.0136076	0.0377864	0.034933	0.034395	0.0387113	0.0519569	0.0491326	0.0148525	0.0421628	0.0729132	0.0615688	0.0336803	0.0169956	0.0358796	0.0172363	0.012656	0.0176219	0.0344327	0.0293905	0.0171178	0.0327805	0.0293553	0.0310229	0.028746
Otu0000622	0.0204256	0.0293858	0.0370963	0.0386464	0.0205985	0.0246236	0.033766	0.030522	0.0144018	0.0336545	0.0412082	0.043312	0.0161943	0.0323423	0.0243565	0.0288724	0.0243353	0.0259994	0.0323463	0.028309	0.0148519	0.028037	0.0187247	0.0179748	0.0148835	0.0280157	0.027481	0.0340596	0.0214969	0.034965	0.0272561	0.0355787	0.0278484	0.0247477	0.0338893	0.041419	0.00721721	0.0289925	0.025463	0.0246233	0.0272591	0.0246707	0.0184461	0.0220428	0.0211455	0.0292367	0.0275761	0.0280683	0.0139624
Otu0000623	0.0180688	0.0293858	0.0233177	0.0386464	0.0189506	0.0237442	0.0348211	0.0364295	0.016322	0.0201927	0.0371454	0.032484	0.0224921	0.0197209	0.0265707	0.0418152	0.0243353	0.0280794	0.0406639	0.0503271	0.022849	0.0230304	0.0312079	0.0431396	0.0248059	0.0248139	0.0291986	0.0253264	0.0128981	0.0274725	0.0272561	0.0144009	0.0417726	0.0256643	0.0287545	0.0235081	0.0296707	0.0259932	0.0416667	0.0418595	0.0223914	0.0264329	0.0295138	0.0367381	0.0171178	0.0301226	0.0542627	0.0310229	0.00657052
Otu0000624	0.0172832	0.018611	0.0169583	0.0196745	0.0288379	0.0228648	0.0221589	0.0177225	0.0172821	0.0258018	0.0162511	0.0308182	0.031489	0.0181432	0.019928	0.019912	0.0133844	0.0166396	0.0147869	0.0220181	0.0217066	0.0390515	0.0287112	0.0107849	0.0231522	0.0224126	0.0214695	0.0392996	0.0283759	0.0118631	0.0298113	0.0330374	0.0129959	0.0174151	0.0154042	0.0156721	0.0264631	0.0279927	0.0173611	0.0332414	0.0175237	0.0246707	0.0233651	0.0272911	0.0201386	0.021263	0.0240179	0.0206819	0.00657052
Otu0000625	0.023568	0.0244882	0.0254375	0.0245932	0.0634434	0.0325383	0.0221589	0.0502137	0.041285	0.0358982	0.0325022	0.0399803	0.0233918	0.0331311	0.0276778	0.034846	0.0535378	0.0519988	0.0397398	0.0204454	0.0411283	0.0410542	0.0686573	0.0587178	0.0405163	0.0184103	0.0377864	0.0392996	0.0292357	0.044955	0.0519569	0.0288018	0.0612665	0.0302472	0.018485	0.0246275	0.0296707	0.0359906	0.0277778	0.0209298	0.0301797	0.0299573	0.0368922	0.046185	0.0261801	0.0389822	0.0329135	0.0354547	0.0205329
Otu0000626	0.0172832	0.00587717	0.0127187	0.0189719	0.0148309	0.0140706	0.0242693	0.0177225	0.0211226	0.0145836	0.0168315	0.0174914	0.0125956	0.0141991	0.0177138	0.0189164	0.0255521	0.0155997	0.0175594	0.0141545	0.0148519	0.0240317	0.0187247	0.0227681	0.00744177	0.0224126	0.0214695	0.0261997	0.0128981	0.0218531	0.0204421	0.0288018	0.0213505	0.0201648	0.0205389	0.0279858	0.0232554	0.0209945	0.0196759	0.0258544	0.0194708	0.0193841	0.0159866	0.0125959	0.0181247	0.0106315	0.0293553	0.0251138	0.0188902
Otu0000627	0.00392801	0.00489764	0.00317968	0.00140532	0.00329576	0.00263824	0.00211037	0.00492291	0.00864105	0.00448727	0.00870595	0.00416462	0.00539811	0.00236651	0.00110711	0.0029868	0.0073006	0.00519988	0.0046209	0.00629089	0.0022849	0.00600793	0.00499326	0.0131815	0.00248059	0.00240135	0.00601147	0.00611327	0.00773887	0.00999001	0.00596227	0.00338845	0.00371312	0.00733266	0.00102695	0.00671659	0.00721721	0.00299922	0.00578704	0.00738698	0.00389416	0.00264329	0	0.00419864	0.00604157	0.0044298	0.00444777	0.010341	0.0484576
Otu0000628	0.000785601	0.0068567	0.0317968	0.138424	0.00082394	0.0246236	0.0411523	0.193963	0.000960117	0.0213145	0.0417886	0.204066	0.000899685	0.0189321	0.0653197	0.190159	0.00243353	0.0176796	0.0369672	0.190299	0.00114245	0.0130172	0.043691	0.110246	0	0.00560314	0.00429391	0.00611327	0	0.00686813	0.0119245	0.00847113	0.00371312	0.00366633	0.00718863	0.00895546	0.00160382	0.00399896	0.0104167	0.00615582	0.00194708	0.0123353	0.00983792	0.00944693	0.00402771	0.00531576	0.00622687	0.00590912	0.00328526
Otu0000629	0	0.000979528	0	0.000702662	0	0.000879415	0	0.000984581	0	0.00336545	0.00116079	0.00416462	0	0	0	0.0029868	0	0	0.00369672	0	0	0	0.00124832	0	0	0	0	0.000873324	0	0	0.000851752	0	0.00371312	0	0	0.00111943	0	0	0	0	0	0	0.00122974	0	0	0.00177192	0	0	0.0624199
Otu0000630	0.0125696	0.0137134	0.00953905	0.0105399	0.0181267	0.00791473	0.0242693	0.0137841	0.0278434	0.02468	0.0121883	0.00832924	0.0215924	0.0189321	0.0221423	0.009956	0.0182515	0.0280794	0.0157111	0.0235908	0.00913962	0.0190251	0.0262146	0.0107849	0.0165373	0.0176099	0.0240459	0.00523995	0.0154777	0.0280969	0.013628	0.0177894	0.023207	0.0210814	0.0164312	0.0156721	0.0224535	0.0179953	0.0104167	0.00984931	0.0194708	0.0158597	0.00983792	0.0115463	0.0110762	0.0168332	0.0169015	0.0118182	0.0525641
Otu0000631	0.0502785	0.0499559	0.0413359	0.0274038	0.0576758	0.057162	0.0348211	0.0344604	0.0566469	0.0695527	0.0412082	0.0483096	0.0647773	0.0512744	0.0575699	0.034846	0.0608384	0.0415991	0.0268012	0.0267363	0.06055	0.0340449	0.0636641	0.0527262	0.0735908	0.0504282	0.0334925	0.034933	0.0576116	0.0343407	0.0374771	0.0330374	0.0686928	0.0302472	0.0267006	0.0291052	0.0665587	0.0409893	0.0231481	0.0393972	0.0915127	0.0872285	0.0344327	0.0388374	0.0604157	0.0558154	0.0329135	0.0280683	0.00739183
Otu0000632	0.00549921	0.0107748	0.00635937	0.0119452	0.0115352	0.0237442	0.0105519	0.0108304	0.0124815	0.0134618	0.00754515	0.00999509	0.0107962	0.0118325	0.0232494	0.0039824	0.00973414	0.0103998	0.0157111	0.0267363	0.0148519	0.0140185	0.0124831	0.0155782	0.00909549	0.0152085	0.0128817	0.0165932	0.0171975	0.0124875	0.013628	0.00931824	0.0129959	0.0137487	0.00718863	0.0100749	0.0192459	0.0109971	0.0219907	0.0123116	0.0116825	0.00792986	0.0135271	0.0115463	0.0171178	0.0106315	0.016012	0.0118182	0.0164263
Otu0000633	0.023568	0.0254677	0.0211979	0.0337278	0.0288379	0.036056	0.0379867	0.0334758	0.0278434	0.0224364	0.0249571	0.0366486	0.0278902	0.0331311	0.038749	0.014934	0.0255521	0.0301593	0.0304979	0.0204454	0.0308462	0.0300397	0.0312079	0.0383463	0.0206716	0.0256143	0.0214695	0.0218331	0.0214969	0.024975	0.0289596	0.0304961	0.0259919	0.0247477	0.0308084	0.0369413	0.0208497	0.0209945	0.0289352	0.0209298	0.0175237	0.0264329	0.028284	0.00944693	0.0231593	0.0159473	0.0249075	0.0192046	0.0303886
Otu0000634	0.0329953	0.0372221	0.049815	0.0709688	0.0346055	0.0448501	0.0358763	0.0502137	0.0336041	0.0392636	0.0441101	0.0583047	0.0305893	0.0425972	0.0431774	0.044802	0.0292024	0.0353592	0.0499057	0.0550453	0.0217066	0.0530701	0.0362011	0.0395446	0.036382	0.039222	0.0352101	0.0454129	0.0283759	0.03996	0.0434394	0.0482854	0.0334181	0.0421628	0.0513474	0.0358218	0.0449071	0.045988	0.0532407	0.0578647	0.0272591	0.0361249	0.0405814	0.0440857	0.0342355	0.042526	0.0622687	0.0590912	0.0147837
Otu0000635	0.0487073	0.0617103	0.069953	0.0351331	0.0650913	0.0404531	0.0422075	0.0403678	0.0384047	0.0302891	0.0423689	0.033317	0.0638776	0.0425972	0.0376418	0.059736	0.0547545	0.043679	0.0397398	0.0345999	0.0616924	0.0530701	0.0586708	0.040743	0.0537461	0.046426	0.0575384	0.0427929	0.0386944	0.0499501	0.0494016	0.0432028	0.0454858	0.0513286	0.0482665	0.041419	0.0392937	0.0559854	0.0324074	0.0554023	0.0428357	0.054628	0.056568	0.0745258	0.042291	0.0629031	0.0649374	0.0561366	0.00821315
Otu0000636	0.0306385	0.0284063	0.0370963	0.041457	0.0403731	0.0659561	0.0474834	0.0364295	0.0460856	0.0403855	0.0342434	0.0291523	0.0386865	0.0646846	0.0420703	0.0487844	0.0474539	0.0405591	0.0425123	0.0377453	0.0388434	0.0540714	0.0411944	0.0419413	0.0487849	0.0664372	0.039504	0.0471595	0.0524524	0.034965	0.0502534	0.0398143	0.0491989	0.0430793	0.0359431	0.0447773	0.0384918	0.0609841	0.0381944	0.0381661	0.0545182	0.0475792	0.0430409	0.0377877	0.0523602	0.0451839	0.0302448	0.0428411	0.0213542
Otu0000637	0.0384945	0.0587717	0.0455755	0.0351331	0	0.0545237	0.0390419	0.0295374	0.0633677	0.0448727	0.0313414	0	0.00179937	0.038653	0.0453916	0.0019912	0.00243353	0.0488789	0.0526783	0.0408908	0.0388434	0	0.0424427	0.00119832	0.0388626	0.00240135	0.0352101	0	0.00257962	0.0374625	0.0408841	0.0406614	0.0287767	0.000916582	0.00308084	0.0380607	0.0505204	0.00099974	0.0474537	0	0.036021	0.0352438	0.0270543	0.0367381	0.0362494	0.0363243	0.00266866	0	0.00246394
Otu0000638	0.0455649	0.0440788	0.0381562	0.0217825	0.0346055	0.0413325	0.0348211	0.0265837	0.0336041	0.0302891	0.0284394	0.0283194	0.0494827	0.0315535	0.038749	0.0388284	0.0352862	0.0155997	0.0221803	0.0173	0.0399858	0.0260344	0.0187247	0.0203715	0.0330745	0.0312175	0.0283398	0.0174665	0.0455734	0.0312188	0.0178868	0.0245663	0.0306333	0.0403296	0.0287545	0.033583	0.0352841	0.0519865	0.025463	0.0270856	0.0408886	0.0361249	0.0295138	0.0388374	0.0453117	0.0301226	0.033803	0.0443184	0.00492789
Otu0000639	0.0549921	0.0430992	0.0508749	0.043565	0.0453167	0.0272619	0.0517041	0.0344604	0.0624076	0.0415073	0.0522357	0.0374816	0.0512821	0.0299758	0.0498201	0.019912	0.0352862	0.0363992	0.0425123	0.0345999	0.047983	0.0400529	0.0399461	0.0215698	0.0553998	0.0488273	0.039504	0.0358063	0.0627709	0.0536963	0.0391806	0.0313432	0.0473423	0.0522452	0.0503204	0.0380607	0.0497185	0.0339912	0.0439815	0.0320102	0.0447828	0.037006	0.0381219	0.0293905	0.0463187	0.0380963	0.0480359	0.0310229	0.0188902
Otu0000640	0.0015712	0.00881575	0.00423958	0.0147559	0.00576758	0.00351766	0.00949668	0.00787665	0.00480058	0.00560909	0.00870595	0.0116609	0.00359874	0.00236651	0.00332134	0.0019912	0.00486707	0.00415991	0.00739344	0.00314545	0.0022849	0.00400529	0.00374494	0	0.00330745	0.00400224	0.00343513	0.0165932	0.00171975	0.00499501	0.00511052	0.0144009	0.00185656	0.00916582	0.00308084	0.0111943	0.00641529	0.00199948	0.00462963	0.00492465	0	0.000881096	0.00368922	0.00734762	0.00201386	0.00265788	0.00444777	0.0073864	0.0501002
Otu0000641	0.0109984	0.0284063	0.0317968	0.0372411	0.0082394	0.0184677	0.0189934	0.0462753	0.0153619	0.0235582	0.0214747	0.0466437	0.0233918	0.0212986	0.0276778	0.064714	0.0121677	0.0218395	0.0231045	0.0581907	0.012567	0.0200264	0.0287112	0.0467346	0.0165373	0.0200112	0.0266222	0.0192131	0.0189172	0.0174825	0.0161833	0.0254134	0.0167091	0.0274975	0.0236198	0.0123138	0.0128306	0.0199948	0.0243056	0.0233921	0.012656	0.0255518	0.0221353	0.0251918	0.0211455	0.021263	0.0177911	0.0295456	0.00821315
Otu0000642	0.023568	0.0323244	0.0339166	0.0484837	0.0313097	0.0228648	0.0432626	0.0255991	0.0268833	0.0403855	0.033663	0.0274865	0.0215924	0.0228763	0.0298921	0.0288724	0.0219018	0.0311993	0.0231045	0.0235908	0.0159943	0.0220291	0.0349528	0.00718993	0.0355551	0.0248139	0.027481	0.0305664	0.0335351	0.02997	0.0425876	0.0364259	0.0250636	0.0210814	0.0338893	0.041419	0.0312746	0.0169956	0.025463	0.0295479	0.0136295	0.0123353	0.0196758	0.0199435	0.0191316	0.0159473	0.0311344	0.0236365	0.0246394
Otu0000643	0.0282817	0.0323244	0.0317968	0.0281065	0.0428449	0.036056	0.0263797	0.0285529	0.0384047	0.0258018	0.0429493	0.0408133	0.0305893	0.0291869	0.0287849	0.0228988	0.0608384	0.0353592	0.0397398	0.0393181	0.0456981	0.0290383	0.0349528	0.037148	0.0429969	0.0368206	0.0403627	0.0401729	0.0404141	0.0330919	0.0323666	0.0288018	0.0315616	0.0238311	0.0164312	0.0190303	0.0264631	0.0379901	0.0335648	0.0258544	0.0331003	0.0317195	0.0307435	0.0241422	0.0312148	0.0230349	0.0320239	0.0132955	0.0205329
Otu0000644	0.0274961	0.0342835	0.0339166	0.0407544	0.0469646	0.0193471	0.0369315	0.0354449	0.041285	0.0302891	0.0504945	0.0274865	0.0269906	0.0323423	0.0453916	0.0328548	0.036503	0.043679	0.0452848	0.0188727	0.0342736	0.0440582	0.0386978	0.0323547	0.036382	0.023213	0.0317749	0.0419196	0.041274	0.0455794	0.0391806	0.0415085	0.0445575	0.0476623	0.0492935	0.0291052	0.0433032	0.0329914	0.0474537	0.0270856	0.0340739	0.0264329	0.0418112	0.0398871	0.0362494	0.0318945	0.0435881	0.036932	0.0139624
Otu0000645	0.00628481	0.00489764	0.00741926	0.00210799	0.00494364	0.00439707	0.0126622	0.000984581	0.00384047	0.0100964	0.00406278	0.00249877	0.00359874	0.00552185	0.00664268	0.004978	0.00486707	0.00831981	0.00646926	0.00157272	0.012567	0.0160211	0.00499326	0.00958658	0.00496118	0.0016009	0.00257635	0.00523995	0.00429937	0.00874126	0.00681402	0.00592979	0.00278484	0.00733266	0.00410779	0.00223886	0.00721721	0.00299922	0.0104167	0.00246233	0.0048677	0.00440548	0.0061487	0.0104966	0.00402771	0.00885959	0.00889553	0.0132955	0.0344952
Otu0000646	0.0542065	0.0362425	0.0370963	0.0344304	0.0337816	0.0457296	0.0263797	0.0275683	0.0528064	0.0358982	0.0348238	0.0308182	0.0449843	0.0331311	0.0321063	0.0358416	0.0450204	0.0499189	0.0406639	0.0314545	0.0319887	0.0470621	0.0362011	0.0467346	0.0463043	0.0408229	0.0403627	0.0410462	0.0421339	0.0318432	0.0391806	0.0491326	0.0436292	0.0485788	0.039024	0.041419	0.0473128	0.0489873	0.03125	0.0369349	0.0623065	0.0387682	0.061487	0.0661285	0.0503464	0.0372103	0.0453672	0.0413638	0.00903446
Otu0000647	0.0306385	0.0274268	0.0307369	0.0323224	0.028014	0.01495	0.0221589	0.0216608	0.024963	0.0280455	0.039467	0.0274865	0.0233918	0.0212986	0.0177138	0.0278768	0.0231186	0.0239195	0.0231045	0.0251636	0.022849	0.0300397	0.0312079	0.0239664	0.0165373	0.0216121	0.0206108	0.029693	0.0223567	0.0355894	0.0229973	0.0262605	0.0306333	0.0339135	0.0369701	0.0291052	0.0296707	0.0289925	0.0289352	0.0344726	0.0146031	0.0229085	0.0233651	0.0251918	0.0241663	0.0168332	0.025797	0.0295456	0.0328526
Otu0000648	0.015712	0.0362425	0.0593541	0.0351331	0.00906335	0.057162	0.0527593	0.0669515	0.0124815	0.0605782	0.0487533	0.0566388	0.0242915	0.0583739	0.117354	0.120468	0.00851737	0.0405591	0.0609959	0.0597635	0.0022849	0.0340449	0.0998652	0.0575195	0.0107492	0.0224126	0.0249047	0.0227064	0.0146179	0.0224775	0.0281078	0.015248	0.0120677	0.0229145	0.018485	0.0111943	0.0112268	0.0209945	0.0162037	0.0233921	0.0146031	0.0431737	0.0295138	0.0272911	0.0100693	0.0354384	0.025797	0.0147728	0.00903446
Otu0000649	0.0274961	0.0235087	0.0339166	0.0281065	0.0222464	0.0281413	0.0358763	0.0108304	0.0403249	0.03702	0.0377258	0.0183243	0.0242915	0.0205097	0.0188209	0.0228988	0.0267689	0.0280794	0.0314221	0.0157272	0.0205641	0.0270357	0.0249663	0.0251648	0.0256328	0.0248139	0.027481	0.0270731	0.027516	0.0224775	0.0264043	0.0313432	0.0213505	0.0265809	0.019512	0.0223886	0.0336803	0.0259932	0.0358796	0.0196986	0.0214179	0.0158597	0.0258245	0.0335891	0.028194	0.0230349	0.0186806	0.0280683	0.0180689
Otu0000650	0.0141408	0.0195906	0.0222578	0.0189719	0.0173027	0.01495	0.0158278	0.0216608	0.0144018	0.0190709	0.0237963	0.0199902	0.00989654	0.0134102	0.0343205	0.0408196	0.0170347	0.0228795	0.0212561	0.0440362	0.0194217	0.0160211	0.0137315	0.0455362	0.0157104	0.0280157	0.0094466	0.0122265	0.0128981	0.01998	0.0247008	0.0144009	0.0194939	0.0229145	0.0123234	0.0179109	0.0136325	0.0109971	0.0185185	0.0295479	0.0165502	0.0220274	0.0147569	0.0356884	0.0130901	0.0230349	0.016012	0.026591	0.0057492
Otu0000651	0.00785601	0.00587717	0.0127187	0.0175665	0.00741546	0.00791473	0.00633112	0.00787665	0.0124815	0.0179491	0.0116079	0.0174914	0.00359874	0.00473302	0.0143925	0.0119472	0.00608384	0.0114397	0.00646926	0.0110091	0.00799717	0.00700925	0.00499326	0.00239665	0.0140567	0.00960538	0.0120229	0.00785992	0.00515925	0.00749251	0.010221	0.0127067	0.00928281	0.0164985	0.00924252	0.0100749	0.00882103	0.00799792	0.0115741	0.00738698	0.00584124	0.00440548	0.00860818	0.00629796	0.0100693	0.0115175	0.00889553	0.00590912	0.0501002
Otu0000652	0.0455649	0.0293858	0.0339166	0.0295118	0.0288379	0.0369354	0.0200485	0.0255991	0.0393648	0.03702	0.0249571	0.0274865	0.0296896	0.0307646	0.0321063	0.0288724	0.0219018	0.0280794	0.0249529	0.0361726	0.0262764	0.0350463	0.0224697	0.0311564	0.0347283	0.0368206	0.0266222	0.0244531	0.0429937	0.0312188	0.0212938	0.0304961	0.0259919	0.0229145	0.0205389	0.0391801	0.0312746	0.0379901	0.0277778	0.0344726	0.0272591	0.0343627	0.0319732	0.0377877	0.0352425	0.0354384	0.0329135	0.0354547	0.013141
Otu0000653	0.00785601	0.018611	0.00741926	0.0238905	0.0197746	0.0158295	0.0242693	0.0364295	0.0105613	0.0213145	0.027859	0.021656	0.00449843	0.0149879	0.0154996	0.0059736	0.0121677	0.00831981	0.010166	0.00786361	0.012567	0.0100132	0.019973	0.0155782	0.0148835	0.0104058	0.0163169	0.0227064	0.00859875	0.0187313	0.0247008	0.015248	0.0148525	0.021998	0.019512	0.0246275	0.0216516	0.0169956	0.0173611	0.0160051	0.0107089	0.0105732	0.0110677	0.0220428	0.0120831	0.0124034	0.0124537	0.0236365	0.015605
Otu0000654	0.0542065	0.0724851	0.00211979	0.00281065	0.0593237	0.0685943	0.00105519	0.000984581	0.00192023	0.0673091	0.0504945	0.0508084	0.0512821	0.0702064	0.0664268	0.0019912	0.0036503	0	0.00369672	0.045609	0.0536953	0.0550727	0.0761472	0.00359497	0.00248059	0.0680381	0.0558208	0.0489062	0.0808282	0.00374625	0.0681402	0.0635335	0.0714776	0.0632441	0.0677785	0.00223886	0.0465109	0.0739808	0.00115741	0.00246233	0.00876185	0.0678444	0.0528788	0.0514333	0.0563879	0.0575874	0.00177911	0.0723867	0.00246394
Otu0000655	0.0455649	0.0274268	0.0254375	0.0245932	0.0247182	0.00967356	0.0232141	0.018707	0.032644	0.0325327	0.0179923	0.0241548	0.0467836	0.0228763	0.0254636	0.019912	0.0219018	0.0187196	0.0286496	0.0235908	0.0217066	0.0220291	0.0262146	0.00599161	0.0264596	0.0312175	0.0377864	0.0244531	0.0249364	0.0318432	0.0110728	0.0203307	0.0222787	0.0449125	0.0451857	0.0134332	0.0312746	0.0139964	0.0185185	0.0209298	0.025312	0.0193841	0.0258245	0.0146952	0.0211455	0.0310086	0.0462568	0.0280683	0.0262821
Otu0000656	0.0212112	0.0254677	0.0158984	0.0267011	0.0222464	0.010553	0.016883	0.0265837	0.024963	0.0224364	0.0191531	0.0233219	0.0206928	0.0189321	0.0166067	0.0219032	0.0109509	0.0353592	0.0138627	0.0314545	0.0194217	0.0260344	0.0187247	0.0119832	0.0124029	0.0216121	0.0171756	0.0384263	0.0154777	0.0280969	0.0195903	0.0245663	0.0222787	0.0174151	0.0256737	0.0279858	0.0176421	0.0309919	0.0335648	0.0283168	0.0282326	0.0193841	0.0184461	0.0293905	0.0221524	0.0265788	0.0284657	0.0339774	0.013141
Otu0000657	0.0180688	0.0372221	0.0264974	0.0309171	0.0601476	0.0325383	0.0242693	0.0324912	0.0364844	0.0426291	0.033663	0.021656	0.0287899	0.0441748	0.0287849	0.0318592	0.0413701	0.0488789	0.0231045	0.0220181	0.0297038	0.0290383	0.0299596	0.0311564	0.036382	0.0448251	0.0334925	0.0279464	0.0421339	0.0293457	0.0298113	0.0228721	0.0417726	0.039413	0.0215659	0.0526133	0.0352841	0.0389899	0.0358796	0.0160051	0.0369945	0.0237896	0.0209056	0.0272911	0.0312148	0.0327805	0.0355821	0.0177274	0.0205329
Otu0000658	0.0439937	0.0244882	0.040276	0.0330251	0.0494364	0.0263824	0.0348211	0.0383987	0.0480058	0.0269236	0.0354042	0.0374816	0.0224921	0.0354976	0.0354276	0.0278768	0.0413701	0.0540788	0.0249529	0.0298817	0.022849	0.0460608	0.0411944	0.037148	0.0231522	0.0288161	0.0334925	0.0314397	0.041274	0.0412088	0.0536604	0.0381201	0.052912	0.0375799	0.0410779	0.0347024	0.0352841	0.0149961	0.0393519	0.0246233	0.0399151	0.0440548	0.033203	0.0346388	0.0322217	0.0318945	0.0355821	0.0487502	0.0147837
Otu0000659	0.0219968	0.0176315	0.0137786	0.0259985	0.0255422	0.0228648	0.0232141	0.011815	0.0211226	0.0179491	0.0156707	0.0141597	0.0260909	0.0149879	0.0166067	0.0219032	0.0243353	0.0259994	0.0147869	0.00471817	0.025134	0.025033	0.0174764	0.00599161	0.018191	0.0208117	0.0240459	0.0183398	0.0283759	0.0181069	0.0161833	0.0177894	0.0185656	0.0155819	0.0123234	0.0257469	0.0152363	0.0159958	0.0138889	0.0209298	0.0223914	0.0176219	0.0147569	0.0241422	0.0251732	0.0159473	0.0151224	0.0236365	0.0336739
Otu0000660	0.00392801	0.0117543	0.0105989	0.0168639	0.0123591	0.0131912	0.00844149	0.0157533	0.0105613	0.0112182	0.0116079	0.00832924	0.0062978	0.0118325	0.00885691	0.0079648	0.00243353	0.0114397	0.0120143	0.0125818	0.00685471	0.0100132	0.00748989	0.0155782	0.00744177	0.0152085	0.0128817	0.0192131	0.0034395	0.00749251	0.0144798	0.015248	0.00371312	0.0119156	0.018485	0.0145526	0.00481147	0.0139964	0.00462963	0.00246233	0.00584124	0.00969206	0.00983792	0.00944693	0.0120831	0.0230349	0.00444777	0.00147728	0.0344952
Otu0000661	0.0102128	0.0176315	0.0116588	0.0119452	0.0123591	0.0114324	0.0200485	0.00492291	0.0105613	0.00785273	0.0145099	0.0149926	0.0116959	0.00709953	0.0177138	0.0189164	0.00608384	0.00519988	0.0110902	0.0141545	0.00913962	0.0160211	0.00748989	0.00599161	0.00992236	0.0104058	0.0180344	0.00873324	0.00945862	0.00561938	0.0110728	0.015248	0.0129959	0.00549949	0.00924252	0.0156721	0.0176421	0.0119969	0.0150463	0.0110805	0.0136295	0.0158597	0.0122974	0.0178442	0.0100693	0.00620172	0.0186806	0.0295456	0.0229968
Otu0000662	0.0353521	0.0450583	0.0169583	0.049889	0.0601476	0.061559	0.0232141	0.018707	0.0259232	0.0549691	0.0319218	0.0341499	0.0521817	0.0441748	0.0442845	0.0358416	0.00486707	0.044719	0.0138627	0.0408908	0.0388434	0.0410542	0.0399461	0.0287597	0.0248059	0.0352197	0.0437979	0.0506528	0.0326752	0.044955	0.0511051	0.0271076	0.0380595	0.0348301	0.0523743	0.0313441	0.0449071	0.0529862	0.0358796	0.0381661	0.025312	0.0334817	0.0184461	0.046185	0.0342355	0.0372103	0.0346926	0.0221592	0.00164263
Otu0000663	0.0133552	0.0107748	0.0190781	0.0274038	0.0173027	0.0263824	0.0189934	0.0196916	0.0201625	0.0157055	0.0226355	0.0266536	0.0161943	0.0157767	0.0121782	0.0179208	0.0109509	0.0124797	0.020332	0.0314545	0.0182792	0.0160211	0.023718	0.0239664	0.018191	0.0128072	0.0231871	0.0244531	0.0189172	0.0193556	0.0178868	0.0254134	0.0222787	0.021998	0.0256737	0.0268664	0.0152363	0.0149961	0.0243056	0.0209298	0.0194708	0.0255518	0.0221353	0.0157449	0.0251732	0.0177192	0.0186806	0.0162501	0.0147837
Otu0000664	0.0447793	0.0323244	0.040276	0.0351331	0.041197	0.0272619	0.0295452	0.0443062	0.0403249	0.0336545	0.030761	0.0383145	0.0449843	0.0347088	0.0221423	0.0238944	0.0438036	0.0395191	0.0304979	0.0330272	0.0445556	0.0390515	0.0249663	0.040743	0.0330745	0.0280157	0.0352101	0.0593861	0.0438536	0.0330919	0.0425876	0.0398143	0.036203	0.0403296	0.0544282	0.041419	0.0288688	0.0399896	0.025463	0.0554023	0.050624	0.0352438	0.0295138	0.0220428	0.042291	0.0345524	0.0355821	0.0339774	0.00410657
Otu0000665	0.0259248	0.0323244	0.0286172	0.0358357	0.0255422	0.0202265	0.0263797	0.0324912	0.0278434	0.0190709	0.0237963	0.0316511	0.0332883	0.0283981	0.0276778	0.0258856	0.0219018	0.0155997	0.0351189	0.0361726	0.022849	0.0260344	0.0362011	0.0299581	0.0355551	0.0280157	0.0283398	0.0384263	0.0369746	0.0262238	0.0272561	0.0432028	0.0157808	0.0293306	0.0338893	0.0470162	0.0248593	0.0289925	0.0405093	0.0369349	0.036021	0.0255518	0.0245948	0.0367381	0.0332286	0.0283507	0.0284657	0.0236365	0.0123197
Otu0000666	0.0298529	0.035263	0.0392161	0.0337278	0.042021	0.0457296	0.0348211	0.0315066	0.048966	0.0392636	0.0417886	0.0274865	0.0458839	0.0410195	0.048713	0.0338504	0.0352862	0.0301593	0.0489816	0.028309	0.0411283	0.0480634	0.0324562	0.0359497	0.0372088	0.0400224	0.0360688	0.034933	0.041274	0.0355894	0.0366254	0.044897	0.046414	0.0449125	0.0328623	0.0436579	0.0320765	0.0379901	0.0277778	0.0393972	0.037968	0.0299573	0.0504193	0.0398871	0.0463187	0.0540435	0.0320239	0.036932	0.0106771
Otu0000667	0.0471361	0	0.0360364	0.0632396	0.00247182	0.0527649	0.00211037	0.0600595	0.00192023	0.00112182	0.0383062	0.0707985	0.0404858	0.0512744	0.00221423	0.0766612	0.0255521	0.045759	0	0.0581907	0.0342736	0.0480634	0	0.0563212	0.0372088	0.0504282	0.0515269	0.000873324	0.0352549	0	0.0366254	0.0652277	0.0408444	0.0531617	0.0636707	0.00111943	0	0.0409893	0.0520833	0.0763321	0.0467299	0.0572712	0.0639465	0.0577313	0.041284	0.0540435	0.0444777	0.0546593	0.000821315
Otu0000668	0.0447793	0.035263	0.0264974	0.0281065	0.0403731	0.0202265	0.0232141	0.0246145	0.024963	0.0336545	0.0237963	0.0233219	0.034188	0.0181432	0.0254636	0.0189164	0.0194683	0.0187196	0.020332	0.0157272	0.025134	0.0180238	0.019973	0.0155782	0.0372088	0.0328184	0.0291986	0.0174665	0.0292357	0.0237263	0.0247008	0.0144009	0.0213505	0.0183316	0.0308084	0.0246275	0.0296707	0.0159958	0.0243056	0.0270856	0.025312	0.0158597	0.0307435	0.0188939	0.0332286	0.0292367	0.0204597	0.0147728	0.0427084
Otu0000669	0	0.00783622	0	0.000702662	0.00329576	0.00351766	0.00211037	0.00295374	0	0.00224364	0.00290198	0.00583047	0.000899685	0.0086772	0.00332134	0.0059736	0	0.00519988	0	0	0.00114245	0.00400529	0	0.00718993	0.000826863	0.00800448	0.00257635	0.000873324	0.00171975	0.00499501	0	0.00254134	0	0.000916582	0.00102695	0	0.00240573	0.00799792	0.00115741	0.00492465	0.00194708	0.00528658	0	0.00209932	0	0	0.00266866	0	0.00410657
Otu0000670	0.0322097	0.0362425	0.0445156	0.0386464	0.0313097	0.0325383	0.0422075	0.0334758	0.032644	0.0415073	0.0441101	0.0449779	0.0413855	0.0362865	0.0398561	0.0228988	0.0316359	0.0405591	0.0286496	0.0204454	0.0262764	0.0340449	0.0449393	0.0227681	0.0322477	0.0336188	0.0309161	0.0331863	0.041274	0.0312188	0.0366254	0.0440499	0.0269201	0.0293306	0.0359431	0.0436579	0.0320765	0.0329914	0.0289352	0.0246233	0.0389416	0.0334817	0.0405814	0.046185	0.0342355	0.0256928	0.0400299	0.036932	0.00164263
Otu0000671	0.0267105	0.0411402	0.020138	0.0267011	0.0321337	0.051006	0.0295452	0.0354449	0.041285	0.0392636	0.0296002	0.043312	0.0233918	0.0394418	0.0243565	0.0278768	0.0413701	0.0415991	0.0268012	0.0267363	0.0342736	0.0380502	0.0362011	0.040743	0.00165373	0.039222	0.027481	0.0384263	0.00257962	0.034965	0.0408841	0.0457441	0.0436292	0.0302472	0.0349162	0.0402996	0.0296707	0.0379901	0.0416667	0.0357037	0.0321268	0.0431737	0.00368922	0.0377877	0.0261801	0.0363243	0.0293553	0.036932	0.00164263
Otu0000672	0.0267105	0.0313449	0.0211979	0.0224852	0.0205985	0.061559	0.0358763	0.0443062	0.0518463	0.0426291	0.0481729	0.0191572	0.0332883	0.0362865	0.038749	0.014934	0.0486707	0.0488789	0.0295738	0.0503271	0.0536953	0.0380502	0.0411944	0.0275614	0.0463043	0.0296166	0.0541033	0.0419196	0.0533122	0.0487013	0.0459946	0.015248	0.036203	0.0293306	0.0164312	0.0369413	0.0344822	0.0389899	0.0358796	0.0307791	0.0301797	0.0378871	0.0319732	0.0167945	0.0382633	0.0239209	0.033803	0.0162501	0.00164263
Otu0000673	0.0125696	0.0284063	0.040276	0.045673	0.0107112	0.0246236	0.0358763	0.0472599	0.0105613	0.0157055	0.0296002	0.0633022	0.0233918	0.0283981	0.0309992	0.0238944	0.0133844	0.0166396	0.0249529	0.028309	0.0137094	0.0190251	0.0499326	0.0383463	0.0148835	0.023213	0.0309161	0.0288197	0.0120382	0.0218531	0.0332183	0.0211778	0.0129959	0.0247477	0.0215659	0.0235081	0.0128306	0.0259932	0.0219907	0.0307791	0.0184972	0.0264329	0.00983792	0.0293905	0.0110762	0.0283507	0.0213493	0.0221592	0.0213542
Otu0000674	0.00314241	0.0107748	0.00529947	0.00281065	0.00741546	0.00791473	0.00422074	0.00393833	0.215066	0.198562	0.0110275	0.145762	0.207827	0.00946604	0.00553557	0.142371	0.214151	0.00311993	0.0092418	0.184009	0.0148519	0.19726	0.0112348	0.0107849	0.00992236	0.00560314	0.0094466	0.0113532	0.00773887	0.00874126	0.00851752	0.00423557	0.00928281	0.00733266	0.18485	0.00447773	0.00962294	0.0119969	0.00810185	0.00615582	0.0136295	0.0114542	0.00860818	0.00734762	0.00704849	0.00708767	0.00622687	0.00147728	0.000821315
Otu0000675	0.00471361	0.00881575	0.00317968	0.00421597	0.00494364	0.0061559	0.00211037	0.00492291	0.00480058	0.00224364	0.00406278	0.00333169	0.00539811	0.00315535	0.00442845	0.004978	0.00486707	0.00415991	0.00554508	0.0125818	0.00571226	0.00500661	0.00249663	0.00718993	0.00496118	0.00640359	0.00429391	0.00523995	0.0111784	0.00811688	0.00255526	0.00508268	0.00649797	0.0100824	0.00205389	0.00783603	0.00481147	0.0049987	0.00694444	0.00492465	0.00778831	0.00704877	0.00368922	0.0052483	0.00906235	0.00354384	0.00622687	0.00886368	0.0328526
Otu0000676	0.0455649	0.0342835	0.0349765	0.0217825	0.0444928	0.0483678	0.0295452	0.0216608	0.0470457	0.0415073	0.0208943	0.0241548	0.0503824	0.0370753	0.0287849	0.02489	0.0474539	0.0270394	0.036043	0.0235908	0.0445556	0.0480634	0.0386978	0.0239664	0.0380357	0.0352197	0.0326337	0.0244531	0.0404141	0.0312188	0.0289596	0.0347316	0.0417726	0.0320804	0.0349162	0.0223886	0.0288688	0.0399896	0.0289352	0.0332414	0.037968	0.0449359	0.0516491	0.0398871	0.0523602	0.0336665	0.0329135	0.0413638	0.0139624
Otu0000677	0.0447793	0.0479969	0.00423958	0.00421597	0.0362534	0.0061559	0.00316556	0.0531674	0.0345642	0.0280455	0.00232159	0.00666339	0.00179937	0.0323423	0.00221423	0	0	0.00103998	0.0489816	0.0345999	0.0342736	0.00100132	0.0399461	0.0491312	0.0454775	0.0368206	0.00515269	0.0034933	0.0395542	0.0455794	0.00425876	0.00254134	0.0278484	0.00458291	0.0544282	0.00223886	0.0489166	0.0329914	0.0335648	0.0406284	0.000973539	0.0211463	0.00122974	0.043036	0.0332286	0.0451839	0.00355821	0.0413638	0.00657052
Otu0000678	0.0164976	0.0146929	0.0180182	0.0154586	0.0321337	0.0061559	0.0253245	0.00886123	0.032644	0.0235582	0.0377258	0.0274865	0.0278902	0.03392	0.0188209	0.0328548	0.0596216	0.0395191	0.0406639	0.0424635	0.0388434	0.0260344	0.0274629	0.0347513	0.0372088	0.0176099	0.0360688	0.0200865	0.0498727	0.0362138	0.0434394	0.0288018	0.0324898	0.0293306	0.0267006	0.0347024	0.0433032	0.0319917	0.0451389	0.0196986	0.036021	0.0176219	0.0430409	0.0293905	0.0241663	0.0318945	0.0400299	0.0354547	0.00985578
Otu0000679	0.0337809	0.0362425	0.0339166	0.041457	0.0477885	0.0536443	0.0517041	0.042337	0.0355243	0.0325327	0.0458513	0.033317	0.0242915	0.0402307	0.0464988	0.019912	0.0559713	0.0374392	0.0434365	0.0503271	0.0536953	0.0460608	0.0486843	0.0227681	0.0281133	0.0528296	0.039504	0.0471595	0.0464332	0.03996	0.0434394	0.029649	0.0194939	0.0348301	0.0287545	0.0458967	0.036086	0.0419891	0.0613426	0.0393972	0.0331003	0.0422926	0.0430409	0.0220428	0.0322217	0.0407541	0.0204597	0.0177274	0.00903446
Otu0000680	0.00549921	0.00195906	0.00635937	0.00632396	0.00576758	0.00791473	0.00527593	0.00492291	0.0105613	0.00448727	0.00986674	0.00583047	0.0107962	0.0110437	0.0110711	0.0039824	0.00973414	0.00415991	0.00739344	0.00471817	0.0159943	0.0100132	0.00748989	0.00599161	0.0115761	0.00960538	0.00429391	0.00523995	0.0111784	0.00561938	0.00766577	0.0110125	0.00928281	0.0146653	0.00821558	0.00447773	0.00801912	0.00699818	0.00925926	0.00492465	0.0146031	0.0105732	0.00860818	0.0115463	0.0130901	0.00885959	0.00889553	0.0118182	0.0772036
Otu0000681	0.011784	0.00979528	0.00741926	0.00632396	0.0115352	0.0061559	0.00633112	0.00295374	0.0057607	0.00448727	0.00928634	0.00749631	0.00899685	0.0102549	0.00553557	0.0109516	0.0073006	0.00519988	0.0046209	0.00471817	0.00685471	0.00400529	0.00624157	0.00359497	0.0107492	0.00720403	0.00429391	0.00261997	0.00515925	0.0106144	0.00766577	0.00847113	0.00835453	0.00183316	0.00718863	0.00559716	0.00882103	0.00799792	0.00810185	0.0135428	0.00778831	0.00969206	0.0147569	0.00839727	0.00906235	0.00708767	0.0106746	0.0132955	0.0402444
Otu0000682	0	0.0440788	0	0	0.00164788	0	0.0253245	0	0	0.02468	0.0237963	0.0316511	0.000899685	0.0410195	0.0309992	0.0139384	0	0.0280794	0.0166352	0.0110091	0.00114245	0.0220291	0.0187247	0.00958658	0	0.0336188	0.0437979	0.029693	0	0.0437063	0.0153315	0.029649	0	0.00824924	0.254683	0.19702	0	0.0139964	0.00115741	0.00861814	0.00194708	0.0299573	0.0110677	0.00839727	0	0.0540435	0.0382508	0.0280683	0
Otu0000683	0.000785601	0.00783622	0.0625338	0.089238	0	0.0562825	0.216313	0.18904	0	0.0134618	0.0446905	0.144929	0	0.0323423	0.12289	0.0438064	0	0.00103998	0.036043	0.0125818	0	0.00400529	0.0386978	0.0179748	0	0	0	0	0	0	0.000851752	0	0	0	0	0	0	0	0	0	0	0	0	0	0	0	0	0	0
Otu0000684	0.0164976	0.0293858	0.0137786	0.0133506	0.00164788	0.0299001	0	0.0127996	0.0172821	0.0426291	0.0174119	0.0124939	0.0251912	0.0228763	0.0177138	0.0308636	0.0133844	0.0322393	0.0314221	0.0251636	0.0137094	0.0120159	0.0299596	0.0311564	0.0190179	0.0424238	0.0206108	0.029693	0.0163376	0.0124875	0.0247008	0.0110125	0.029705	0.0348301	0.0338893	0.0246275	0.0152363	0.0219943	0.0243056	0.0270856	0.0262856	0.0317195	0.0381219	0.0388374	0.0261801	0.0327805	0.0222388	0.0443184	0.00657052
Otu0000685	0	0.000979528	0.00317968	0.00140532	0.00082394	0.00175883	0	0	0	0	0.00174119	0.00166585	0	0.00157767	0.00332134	0	0	0.00415991	0.00739344	0.00943634	0	0.00200264	0.00998652	0.00958658	0	0.00320179	0	0.000873324	0	0.000624376	0	0.000847113	0.00185656	0	0	0.00111943	0	0.00299922	0.00578704	0	0	0.00264329	0.00122974	0.00104966	0	0.00177192	0	0.00147728	0
Otu0000686	0.0164976	0.0254677	0.0286172	0.0161612	0.0197746	0.00791473	0.0232141	0.0147687	0.0144018	0.0145836	0.0243767	0.0141597	0.0125956	0.00631069	0.0154996	0.0209076	0.0133844	0.0187196	0.0157111	0.0188727	0.0148519	0.0130172	0.0162281	0.0119832	0.0165373	0.0272152	0.0180344	0.0218331	0.0120382	0.0131119	0.0264043	0.0194836	0.0185656	0.0265809	0.0236198	0.0223886	0.0256612	0.00799792	0.0162037	0.0209298	0.0223914	0.0123353	0.0196758	0.0125959	0.0171178	0.00974555	0.0240179	0.0177274	0.0386018
Otu0000687	0.0337809	0.0264473	0.0254375	0.0196745	0.02719	0.0263824	0.0232141	0.0315066	0.0297636	0.0358982	0.0272786	0.0274865	0.0377868	0.0276093	0.0254636	0.0228988	0.0231186	0.0374392	0.0212561	0.0345999	0.0308462	0.0360476	0.0262146	0.0227681	0.0339014	0.0264148	0.0249047	0.032313	0.0318154	0.024975	0.0323666	0.0245663	0.036203	0.028414	0.0246467	0.0246275	0.0304726	0.026993	0.0277778	0.0332414	0.0331003	0.0378871	0.0307435	0.0356884	0.0382633	0.0248069	0.0435881	0.0384093	0.00985578
Otu0000688	0.000785601	0.018611	0.0233177	0	0.013183	0.0219854	0.0221589	0.00196916	0.0230428	0.02468	0.0214747	0	0.0233918	0.0307646	0.0243565	0.0019912	0.0194683	0.0187196	0.0286496	0.00314545	0.0217066	0.0240317	0.0299596	0.00479329	0.0148835	0.0288161	0.0206108	0.0253264	0.0309555	0.0231019	0.0178868	0.0220249	0.0334181	0.0293306	0.00102695	0.0324635	0.0200478	0.0279927	0.0277778	0.0283168	0.0233649	0.027314	0.0307435	0	0.028194	0.0150613	0.016012	0.0310229	0
Otu0000689	0.015712	0.0156724	0.0137786	0.0105399	0.0115352	0.0167089	0.0147726	0.00689207	0.024963	0.0190709	0.0133491	0.0124939	0.0161943	0.0110437	0.0177138	0.0139384	0.0292024	0.0176796	0.0184836	0.00786361	0.0148519	0.0100132	0.0087382	0.0143799	0.00992236	0.0144081	0.0257635	0.0174665	0.00773887	0.0156094	0.010221	0.0169423	0.0120677	0.0119156	0.0133503	0.0156721	0.0112268	0.0119969	0.0138889	0.00861814	0.0204443	0.0140975	0.0221353	0.0220428	0.0181247	0.0159473	0.0133433	0.0177274	0.0229968
Otu0000690	0.0408513	0.0313449	0.0360364	0.0407544	0.041197	0.025503	0.0390419	0.0344604	0.0508862	0.0235582	0.0470121	0.0383145	0.0251912	0.0323423	0.0498201	0.0408196	0.0425868	0.044719	0.0526783	0.0361726	0.0262764	0.0510674	0.0461876	0.037148	0.0339014	0.0416233	0.0455154	0.0366796	0.0378345	0.0593157	0.0332183	0.0321903	0.029705	0.0403296	0.037997	0.0313441	0.0449071	0.0279927	0.0509259	0.0172363	0.0369945	0.0299573	0.0344327	0.0283408	0.0312148	0.0460699	0.0435881	0.0325001	0.015605
Otu0000691	0.0180688	0.0244882	0.00105989	0.0274038	0.0181267	0.0131912	0.016883	0.0324912	0.024963	0.0145836	0.0255374	0.0258206	0.0206928	0.0149879	0.0132854	0.014934	0.0267689	0.0280794	0.0194078	0.0141545	0.0194217	0.0210278	0.0124831	0.00838826	0.0132298	0.0264148	0.0111642	0.0183398	0.00773887	0.0243506	0.0229973	0.0271076	0.0352747	0.0192482	0.0267006	0.0179109	0.0120287	0.0159958	0.0324074	0.0283168	0.0175237	0.0193841	0.0159866	0.0157449	0.0221524	0.0194911	0.0195702	0.0310229	0.0386018
Otu0000692	0.0180688	0.0264473	0.0190781	0.0281065	0.0304858	0.0175883	0.033766	0.02363	0.024963	0.0168273	0.0325022	0.0274865	0.0188934	0.0220874	0.0265707	0.0129428	0.0316359	0.0207995	0.0277254	0.00943634	0.035416	0.0360476	0.0324562	0.0179748	0.0297671	0.0176099	0.0334925	0.0314397	0.0292357	0.0362138	0.0264043	0.0440499	0.0380595	0.0247477	0.0369701	0.0268664	0.0320765	0.0299922	0.0497685	0.0332414	0.0311533	0.0237896	0.0245948	0.0241422	0.0292009	0.0292367	0.041809	0.0487502	0.013141
Otu0000693	0.0251392	0.0333039	0.0286172	0.041457	0.0354294	0.0272619	0.0379867	0.0383987	0	0.0314109	0.0452709	0.0316511	0.0224921	0.00157767	0	0.0238944	0.0632719	0.042639	0.00092418	0.0204454	0.0022849	0.0350463	0.0324562	0.00239665	0.0330745	0.0200112	0.0266222	0.0288197	0.0292357	0.0355894	0.000851752	0.0262605	0.000928281	0.0274975	0.0164312	0	0.036086	0	0.00115741	0.00123116	0.00194708	0.0193841	0.0319732	0.0220428	0.0231593	0.0327805	0	0.0280683	0.013141
Otu0000694	0.0329953	0.0430992	0.0349765	0.0330251	0.0296619	0.0307795	0.0232141	0.0226454	0.0259232	0.0157055	0.030761	0.0283194	0.031489	0.0157767	0.0332134	0.019912	0.0413701	0.0311993	0.0268012	0.0220181	0.0308462	0.0180238	0.0174764	0.0167765	0.0330745	0.0256143	0.0326337	0.0209598	0.0386944	0.0231019	0.0332183	0.0203307	0.0287767	0.0311638	0.0318354	0.0246275	0.0288688	0.0239938	0.0358796	0.0123116	0.0301797	0.0132164	0.0270543	0.0199435	0.0231593	0.0318945	0.0240179	0.0206819	0.0246394
Otu0000695	0.0518497	0.0646488	0.0487552	0.0372411	0.0428449	0.0598002	0.045373	0.0521828	0.0316839	0.0381418	0.0348238	0.0241548	0.0422852	0.0441748	0.0354276	0.0268812	0.052321	0.0332793	0.0388156	0.0534726	0.0388434	0.0440582	0.0449393	0.033553	0.0413432	0.039222	0.0429391	0.0489062	0.0335351	0.03996	0.0434394	0.0465912	0.0538403	0.0366633	0.0400509	0.0458967	0.0489166	0.0479875	0.0324074	0.0627893	0.0408886	0.0625578	0.0381219	0.0451354	0.0372563	0.0460699	0.0471463	0.0384093	0.00739183
Otu0000696	0.0306385	0.000979528	0.0529947	0.0337278	0.0329576	0.0633179	0	0.0324912	0	0.0437509	0.00116079	0	0.0431849	0.000788836	0.00110711	0.0607316	0.0279856	0.0519988	0.0619201	0.0723452	0.035416	0.0600793	0	0.00239665	0.0405163	0.0552309	0.074714	0.0305664	0.000859875	0.0418332	0.00340701	0.0415085	0.0436292	0.000916582	0.00205389	0.0470162	0.0336803	0	0	0.0640205	0.0223914	0.0528658	0.00491896	0	0.0392702	0.0726487	0.00177911	0.00295456	0.000821315
Otu0000697	0.0227824	0.0264473	0.0349765	0.0274038	0.0304858	0.0448501	0.0306004	0.0196916	0.0316839	0.0258018	0.027859	0.0208231	0.014395	0.0425972	0.0265707	0.0169252	0.0644887	0.0228795	0.0314221	0.0235908	0.0194217	0.028037	0.0287112	0	0.023979	0.0240134	0.0214695	0.0375529	0.0300956	0.0237263	0.0289596	0.0177894	0.0213505	0.0238311	0.019512	0.0235081	0.0304726	0.0289925	0.0277778	0.0233921	0.0282326	0.0299573	0.0196758	0.0167945	0.028194	0.0194911	0.0240179	0.0251138	0.0172476
Otu0000698	0.0447793	0.0333039	0.0275573	0.0189719	0.0387252	0.0580414	0.0306004	0.02363	0.0355243	0.0280455	0.0301806	0.0208231	0.0386865	0.03392	0.0243565	0.0278768	0.0389365	0.0343192	0.0314221	0.0267363	0.0331311	0.0190251	0.0274629	0.037148	0.0347283	0.0312175	0.0352101	0.0261997	0.0369746	0.0293457	0.0340701	0.0330374	0.0436292	0.0201648	0.0246467	0.0358218	0.0344822	0.0279927	0.0347222	0.0344726	0.0408886	0.0387682	0.033203	0.0314898	0.0382633	0.0310086	0.0240179	0.0384093	0.0205329
Otu0000699	0.0392801	0.0401606	0.0455755	0.0330251	0.0346055	0.0325383	0.0306004	0.0324912	0.0374446	0.0291673	0.0266982	0.0266536	0.00179937	0.0410195	0.00332134	0.0338504	0.0255521	0.00207995	0.0295738	0	0.0434132	0.00200264	0.0212214	0.0251648	0.00330745	0.00320179	0.00171756	0.029693	0.0378345	0.000624376	0.0247008	0.0321903	0.0427009	0.021998	0.00308084	0.00111943	0.0312746	0.0399896	0.03125	0.045553	0.0389416	0.0484603	0.0504193	0.00314898	0.00100693	0.0318945	0.0266866	0.0413638	0.0139624
Otu0000700	0.0125696	0.0068567	0.0222578	0.0217825	0.013183	0.00791473	0.00105519	0.0137841	0	0.0179491	0	0.010828	0	0.0118325	0	0.009956	0.0121677	0.00623986	0.0147869	0.0125818	0.00913962	0	0.0137315	0.0155782	0.00578804	0.0104058	0.0111642	0.0218331	0.0154777	0.0131119	0.00766577	0.0169423	0	0.0183316	0.0174581	0.0156721	0.0208497	0	0	0	0.00778831	0.00528658	0	0	0.0181247	0.0177192	0.0169015	0.0132955	0.0476363
Otu0000701	0.0377089	0.0303654	0.0635937	0.0660502	0.0148309	0.0202265	0.0517041	0.110273	0.0201625	0.0302891	0.0516553	0.113278	0.0179937	0.0181432	0.0143925	0.0159296	0.0219018	0.0280794	0.0194078	0.00629089	0.0262764	0.00801057	0.0149798	0.00958658	0.0281133	0.0328184	0.0369276	0.0471595	0.0223567	0.0243506	0.0400324	0.0355787	0.0222787	0.0293306	0.0338893	0.0436579	0.0288688	0.026993	0.0150463	0.0221609	0.0272591	0.0290762	0.0233651	0.0262415	0.0261801	0.0168332	0.0231284	0.00886368	0.0123197
Otu0000702	0.0267105	0.0489764	0.0413359	0.0625369	0.0346055	0.0369354	0.0422075	0	0.0374446	0.0224364	0.0452709	0.0341499	0.0242915	0.0252428	0.0365347	0.000995599	0.0742228	0.00103998	0.00369672	0.0393181	0.0377009	0.0400529	0.0386978	0.0323547	0.023979	0.0224126	0.0343513	0.0270731	0.034395	0.03996	0.0357736	0.0211778	0.0204222	0.0265809	0.0410779	0.0347024	0.0288688	0.0309919	0.025463	0.0135428	0.0204443	0	0.0368922	0.0167945	0.0211455	0.0363243	0.0329135	0.0413638	0.015605
Otu0000703	0.0306385	0.035263	0.0434557	0.0224852	0.042021	0.0272619	0.0221589	0.018707	0.041285	0.0459945	0.0388866	0.0383145	0.0539811	0.0157767	0.0243565	0.0338504	0.0292024	0.0322393	0.0443607	0.0534726	0.0331311	0.025033	0.0299596	0.0311564	0.04217	0.0448251	0.0223283	0.0384263	0.0257962	0.044955	0.0391806	0.0313432	0.0445575	0.0247477	0.0246467	0.0257469	0.0208497	0.0279927	0.025463	0.0332414	0.0399151	0.0361249	0.0344327	0.0409367	0.0513533	0.0265788	0.0320239	0.0310229	0.0197116
Otu0000704	0.00314241	0	0.00317968	0.00140532	0	0.00263824	0	0.00196916	0	0.00112182	0.00232159	0.00416462	0.000899685	0.00157767	0.00110711	0.0019912	0	0.00103998	0.00092418	0	0.0022849	0	0.00124832	0	0	0.000800448	0.000858782	0.00261997	0.000859875	0.00124875	0.000851752	0	0.00185656	0	0.00102695	0.00111943	0.000801912	0.00199948	0	0.00123116	0.000973539	0.000881096	0.00122974	0.00209932	0.00604157	0.000885959	0	0.00147728	0
Otu0000705	0.0243536	0.0372221	0.0286172	0.0365384	0.0173027	0.0263824	0.0242693	0.0295374	0.024963	0.02468	0.0290198	0.0299853	0.0197931	0.0252428	0.0287849	0.019912	0.0146012	0.0249594	0.020332	0.0298817	0.022849	0.0230304	0.0274629	0.0239664	0.018191	0.0280157	0.0145993	0.0253264	0.0232166	0.0212288	0.0110728	0.0338845	0.0204222	0.00824924	0.0215659	0.0291052	0.0168401	0.026993	0.0243056	0.0381661	0.0223914	0.0246707	0.0245948	0.0188939	0.0342355	0.0265788	0.0311344	0.0384093	0.00492789
Otu0000706	0.011784	0.016652	0.0169583	0.0133506	0.0041197	0.0131912	0.0189934	0.00689207	0.0172821	0.0168273	0.0150903	0.010828	0.00899685	0.0149879	0.00885691	0.0079648	0.0133844	0.0145597	0.0147869	0.0125818	0.0114245	0.0150198	0.0162281	0.0143799	0.00578804	0.0208117	0.0145993	0.0122265	0.0163376	0.0156094	0.0204421	0.0110125	0.0102111	0.00366633	0.0164312	0.0111943	0.0192459	0.00699818	0.0138889	0.00861814	0.00389416	0.00792986	0.0135271	0.00944693	0.00906235	0.00708767	0.00889553	0.0147728	0.0271034
Otu0000707	0.0628481	0.0460378	0.0339166	0.0344304	0.0659152	0.0386942	0.045373	0.0334758	0.0470457	0.0459945	0.0255374	0.0316511	0.0548808	0.03392	0.0420703	0.0318592	0.0498874	0.0384791	0.0332705	0.0487544	0.0594075	0.0350463	0.0424427	0.0311564	0.0578804	0.0400224	0.0498094	0.0436662	0.055032	0.0474525	0.0391806	0.0474383	0.0566251	0.0375799	0.0472396	0.0291052	0.0489166	0.0519865	0.0393519	0.060327	0.050624	0.0414115	0.0491896	0.0398871	0.069478	0.042526	0.0364717	0.00147728	0.015605
Otu0000708	0.0408513	0.0293858	0.0445156	0.0281065	0.0238943	0.0290207	0.0158278	0.0206762	0.016322	0.0235582	0.0243767	0.0199902	0.031489	0.0362865	0.019928	0.0258856	0.0328527	0.0249594	0.0323463	0.0188727	0.0297038	0.0170225	0.0287112	0.0203715	0.023979	0.0344193	0.0291986	0.0331863	0.0249364	0.01998	0.0247008	0.0262605	0.023207	0.021998	0.0318354	0.0190303	0.0384918	0.045988	0.0324074	0.0357037	0.037968	0.0246707	0.028284	0.0346388	0.041284	0.0256928	0.033803	0.0413638	0.00164263
Otu0000709	0.0204256	0.0244882	0.0169583	0.00281065	0.00329576	0.0167089	0.00105519	0.0147687	0.0182422	0.0291673	0.0156707	0.0208231	0.0179937	0.0212986	0	0	0.0109509	0.0114397	0.0194078	0.00629089	0.012567	0.0140185	0.0174764	0.0155782	0.0223253	0.0152085	0.019752	0.0139732	0.027516	0.0124875	0.0017035	0.0127067	0	0.0155819	0.0205389	0.0123138	0	0.0259932	0.0115741	0.00738698	0.0272591	0.0132164	0.0196758	0.0136456	0.0161108	0.0150613	0.0204597	0.010341	0.0558494
Otu0000710	0.0172832	0.0254677	0.020138	0.0330251	0.0164788	0.0167089	0.0179382	0.0374141	0.0201625	0.0201927	0.0220551	0.0199902	0.0215924	0.0236651	0.0343205	0.0219032	0.0243353	0.0291193	0.0249529	0.0110091	0.0285613	0.0220291	0.0174764	0.0287597	0.018191	0.0248139	0.0266222	0.032313	0.0240765	0.0262238	0.0315148	0.029649	0.0324898	0.0247477	0.0256737	0.0268664	0.0280669	0.0319917	0.0347222	0.0221609	0.0272591	0.0193841	0.0356625	0.0251918	0.027187	0.0248069	0.0320239	0.0280683	0.00739183
Otu0000711	0.0329953	0.0293858	0.0222578	0.0210799	0.0304858	0.0316589	0.0274348	0.0334758	0.0105613	0.0325327	0.0261178	0.0149926	0.0260909	0.0173544	0.0298921	0.0219032	0.0194683	0.0228795	0.0129385	0.0173	0.0274189	0.0270357	0.0299596	0.0215698	0.0272865	0.023213	0.0240459	0.0209598	0.0257962	0.0274725	0.0289596	0.0228721	0.0204222	0.010999	0.0123234	0.0167915	0.0232554	0.0249935	0.0162037	0.0246233	0.0243385	0.0220274	0.0295138	0.0293905	0.0322217	0.0274647	0.0249075	0.0192046	0.0344952
Otu0000712	0.0463505	0.0313449	0.0264974	0.0393491	0.0395491	0.0281413	0.0348211	0.0413524	0.0451255	0.0280455	0.0313414	0.0283194	0.0431849	0.0268204	0.0276778	0.029868	0.0279856	0.0197596	0.0194078	0.0251636	0.0308462	0.0380502	0.0249663	0.0167765	0.0372088	0.0320179	0.0317749	0.032313	0.0438536	0.0268482	0.0289596	0.0406614	0.0204222	0.028414	0.0349162	0.0548522	0.0288688	0.0369904	0.0277778	0.0221609	0.0438093	0.0466981	0.0307435	0.0398871	0.042291	0.0407541	0.0382508	0.0251138	0.000821315
Otu0000713	0.0494929	0.053874	0.0222578	0.0337278	0.0313097	0.0351766	0.045373	0.0334758	0.0441654	0.04936	0.0296002	0.0208231	0.0386865	0.0331311	0.0420703	0.0418152	0.0425868	0.0363992	0.0314221	0.0125818	0.06055	0.0300397	0.0374494	0.037148	0.0479581	0.0432242	0.0498094	0.0454129	0.0361147	0.0337163	0.0315148	0.0440499	0.0547686	0.0430793	0.0400509	0.0313441	0.0433032	0.0359906	0.0509259	0.0344726	0.0428357	0.0484603	0.0553383	0.0472347	0.0573949	0.0460699	0.0275761	0.0531821	0.0106771
Otu0000714	0.00628481	0.00881575	0.0180182	0.0091346	0.00659152	0.00791473	0.00633112	0.00590749	0.00768093	0.01234	0.00754515	0.00999509	0.0116959	0.00552185	0.0110711	0.0109516	0.00486707	0.00519988	0.00831762	0.00786361	0.0148519	0.0130172	0.0124831	0.00838826	0.0107492	0.0144081	0.0128817	0.0113532	0.0120382	0.00624376	0.00511052	0.0110125	0.0111394	0.0100824	0.00308084	0.00559716	0.0160382	0.0149961	0.00462963	0.0172363	0.00389416	0.0176219	0.00860818	0.0146952	0.00906235	0.00708767	0.0106746	0.0073864	0.0262821
Otu0000715	0.0542065	0.0342835	0.0317968	0.0358357	0.0510843	0.0413325	0.0443178	0.0383987	0.0518463	0.0302891	0.0266982	0.0291523	0.0305893	0.0560074	0.0309992	0.0308636	0.0535378	0.0228795	0.0369672	0.028309	0.0456981	0.0540714	0.0362011	0.0287597	0.0429969	0.0544305	0.0343513	0.0401729	0.0386944	0.0430819	0.0425876	0.0254134	0.0427009	0.0430793	0.0256737	0.0447773	0.0433032	0.0479875	0.0335648	0.0332414	0.050624	0.0361249	0.0245948	0.0335891	0.0483325	0.044298	0.0320239	0.0325001	0.0139624
Otu0000716	0.0259248	0.0176315	0.0286172	0.0288091	0.0255422	0.01495	0.02849	0.0246145	0.0316839	0.0224364	0.0330826	0.021656	0.031489	0.0189321	0.0298921	0.0238944	0.0304192	0.0301593	0.0304979	0.0188727	0.0285613	0.0270357	0.0287112	0.0311564	0.0264596	0.0264148	0.0300574	0.0235798	0.027516	0.0455794	0.0289596	0.0271076	0.046414	0.0192482	0.019512	0.0268664	0.0304726	0.0219943	0.0324074	0.0221609	0.0262856	0.018503	0.0122974	0.0157449	0.0362494	0.0327805	0.0355821	0.0325001	0.0164263
Otu0000717	0.0463505	0.0479969	0.049815	0.0358357	0.0453167	0.061559	0.0601456	0.0403678	0.0422451	0.0302891	0.0475925	0.00666339	0.0539811	0.0520632	0.0509272	0.039824	0.0912575	0.046799	0.056375	0.0314545	0.0399858	0.0390515	0.0424427	0.0287597	0.0620147	0.0488273	0.0386452	0.0436662	0.0498727	0.0580669	0.0451429	0.0499797	0.0427009	0.0384964	0.0369701	0.0503745	0.0673606	0.0419891	0.0590278	0.0270856	0.0428357	0.0713688	0.0405814	0.0440857	0.0533672	0.0380963	0.0471463	0.0280683	0.00410657
Otu0000718	0.015712	0.0176315	0.0190781	0.0203772	0.02719	0.0131912	0.0242693	0.02363	0.0115214	0.0179491	0.0121883	0.0258206	0.014395	0.0220874	0.0143925	0.0209076	0.0182515	0.0103998	0.0157111	0.0235908	0.0171368	0.0130172	0.0124831	0.0203715	0.00744177	0.0168094	0.0180344	0.032313	0.0120382	0.00686813	0.0281078	0.0254134	0.0176373	0.0238311	0.0215659	0.0235081	0.00882103	0.0139964	0.0196759	0.0184674	0.0184972	0.0193841	0.0258245	0.0178442	0.0201386	0.0159473	0.0186806	0.0206819	0.00985578
Otu0000719	0.0542065	0.0421197	0.0445156	0.0421597	0.0593237	0.0299001	0.0390419	0.0344604	0.041285	0.0314109	0.0354042	0.0374816	0.0503824	0.0362865	0.038749	0.0428108	0.0486707	0.0353592	0.0471332	0.0330272	0.0456981	0.0570753	0.0399461	0.0431396	0.0355551	0.0432242	0.0420803	0.0541461	0.0524524	0.0555694	0.0459946	0.0398143	0.0742625	0.0494954	0.0667516	0.0358218	0.0473128	0.0349909	0.0555556	0.045553	0.0496505	0.0422926	0.0393517	0.046185	0.0674642	0.0469558	0.0533732	0.0398865	0.00410657
Otu0000720	0.0180688	0.0254677	0.029677	0.0210799	0.0115352	0.0351766	0.0158278	0.018707	0	0.0291673	0.0255374	0.0349828	0.014395	0.0212986	0.0188209	0.0328548	0.015818	0.0228795	0.0212561	0.0125818	0.012567	0.0260344	0.0149798	0.0143799	0.0231522	0.0256143	0.019752	0.029693	0.0197771	0.0237263	0.0306631	0.029649	0.0194939	0.0274975	0.0256737	0.0100749	0.0224535	0.00099974	0.0300926	0.0246233	0.0223914	0.00440548	0.0221353	0.0167945	0.0151039	0.0194911	0.0240179	0.0221592	0.0114984
Otu0000721	0.0471361	0.0372221	0.0158984	0.0583209	0.055204	0.0430913	0.0390419	0.0275683	0.0230428	0.0134618	0.0470121	0.0499754	0.0512821	0.00157767	0.00221423	0.0368372	0.0279856	0.0239195	0.00277254	0.0471817	0	0.0450595	0.047436	0.00239665	0.0314208	0.0440247	0.0291986	0.0445395	0.0369746	0.0262238	0.0468464	0.0465912	0.0241353	0.0412462	0.0369701	0.041419	0.0473128	0.0469878	0.0636574	0.0344726	0.037968	0.0343627	0.0270543	0.0209932	0.0352425	0.0398682	0.0204597	0.0384093	0
Otu0000722	0.0290673	0.0479969	0.040276	0.043565	0.0519082	0.0580414	0.0443178	0.042337	0.0518463	0.0605782	0.0417886	0.043312	0.034188	0.0441748	0.0464988	0.0228988	0.0511042	0.0509589	0.0443607	0.0298817	0.0308462	0.0520687	0.0349528	0.0167765	0.0396894	0.0664372	0.0661262	0.0436662	0.0524524	0.0480769	0.0459946	0.0533681	0.046414	0.0678271	0.0492935	0.0447773	0.0416994	0.0399896	0.0277778	0.0381661	0.0340739	0.0704877	0.0455004	0.0335891	0.0463187	0.0708767	0.0355821	0.0310229	0.00164263
Otu0000723	0.0251392	0.0333039	0.0360364	0.047781	0.0173027	0.0307795	0.0316556	0.0502137	0	0	0.036565	0.0674668	0.000899685	0.0370753	0.0509272	0.0368372	0.0243353	0.0228795	0.0286496	0.0298817	0.0308462	0.0270357	0.0262146	0.0239664	0.0231522	0.0328184	0.0334925	0.0384263	0.000859875	0.0231019	0.0315148	0.044897	0.0167091	0.0229145	0.0287545	0.041419	0.0248593	0.0349909	0.0289352	0.0393972	0.0262856	0.0264329	0.028284	0.0503837	0.0261801	0.0274647	0.0311344	0.0325001	0.00821315
Otu0000724	0.0172832	0.0107748	0.00635937	0.0126479	0.0214225	0.0131912	0.0179382	0.0127996	0.0278434	0.01234	0.0208943	0.00916216	0.0107962	0.0110437	0.0177138	0.009956	0.0170347	0.0207995	0.0120143	0.00943634	0.0137094	0.0120159	0.0137315	0.0227681	0.0206716	0.0104058	0.0145993	0.0139732	0.0257962	0.0187313	0.00936928	0.0160951	0.0176373	0.0137487	0.00718863	0.0179109	0.0240574	0.0099974	0.0150463	0.00738698	0.0136295	0.00881096	0.0135271	0.0167945	0.0110762	0.0168332	0.0142328	0.00886368	0.0205329
Otu0000725	0.0329953	0.0323244	0.0317968	0.0323224	0.0238943	0.0307795	0.0327108	0.0374141	0.0345642	0.0302891	0.0417886	0.0308182	0.0269906	0.0347088	0.0420703	0.0209076	0.0401533	0.0395191	0.036043	0.0220181	0.0342736	0.031041	0.0449393	0.0239664	0.0388626	0.0248139	0.0240459	0.0200865	0.0455734	0.0443307	0.0315148	0.0245663	0.0148525	0.028414	0.0441587	0.0347024	0.0296707	0.026993	0.0231481	0.0184674	0.0204443	0.0237896	0.028284	0.0314898	0.0241663	0.0186051	0.033803	0.0221592	0.0139624
Otu0000726	0.0227824	0.0127339	0.0137786	0.0126479	0.014007	0.0140706	0.011607	0.0137841	0.0144018	0.0314109	0.0197335	0.0158256	0.0188934	0.0165656	0.0110711	0.0169252	0.00851737	0.0166396	0.0120143	0.00157272	0.012567	0.0160211	0.0149798	0.00718993	0.0248059	0.0184103	0.0094466	0.0139732	0.0146179	0.0168581	0.0110728	0.0237192	0.029705	0.0229145	0.0174581	0.0156721	0.0128306	0.0109971	0.0185185	0.0184674	0.0204443	0.00969206	0.0221353	0.0262415	0.0181247	0.0141753	0.0186806	0.0206819	0.0484576
Otu0000727	0.00628481	0.0068567	0.00423958	0.0105399	0.00494364	0.00527649	0.00844149	0.00590749	0.016322	0.00336545	0.0139295	0.00583047	0.0062978	0.0102549	0.00442845	0.014934	0.0231186	0.00623986	0.0138627	0.00314545	0.00799717	0.00700925	0.00499326	0.00718993	0.00992236	0.0016009	0.00858782	0.00523995	0.0154777	0.0112388	0.00511052	0.00254134	0.00556969	0.00549949	0.00513473	0.0123138	0.00721721	0.00099974	0.00810185	0.00369349	0.00681477	0.00264329	0.0061487	0.00734762	0.00503464	0.00531576	0.0115642	0.00886368	0.0558494
Otu0000728	0.00471361	0.00195906	0.00423958	0.00281065	0.00247182	0.00263824	0.00105519	0.00295374	0.00288035	0.00224364	0.00290198	0.00583047	0.00449843	0.00709953	0.00332134	0	0.00608384	0.00415991	0.00369672	0.00157272	0.0022849	0.00200264	0.00624157	0.00359497	0.00330745	0.00240135	0.00687025	0.00523995	0.006879	0.00312188	0.00255526	0.00762402	0.00371312	0.00641607	0.00205389	0.0100749	0.00320765	0.00399896	0	0.00615582	0.000973539	0.00176219	0	0.00104966	0.00201386	0.0044298	0.00266866	0	0.044351
Otu0000729	0.0573489	0.0401606	0.00105989	0.0344304	0.0683871	0.0413325	0.0422075	0.0206762	0.041285	0.00336545	0.0377258	0.0274865	0.0665767	0.0465413	0.038749	0.0338504	0.0340695	0.0384791	0.0341947	0.0314545	0.0616924	0.0570753	0.0374494	0.00119832	0.0587073	0.0576323	0.0352101	0.0392996	0.075669	0.0505744	0.0366254	0.037273	0.0204222	0.0302472	0.0267006	0.0167915	0.045709	0.0199948	0.0381944	0.0283168	0.06328	0.0555091	0.0430409	0.0377877	0.0724988	0.0504997	0.0515941	0.00147728	0.0172476
Otu0000730	0.0322097	0.0264473	0.0307369	0.0217825	0.0181267	0.0202265	0.0232141	0.0226454	0.0220827	0.0235582	0.0145099	0.0208231	0.0305893	0.0197209	0.0232494	0.0159296	0.00851737	0.0197596	0.0184836	0.0110091	0.0194217	0.0200264	0.023718	0.0131815	0.0206716	0.0264148	0.0257635	0.0305664	0.0214969	0.0131119	0.0212938	0.0279547	0.0250636	0.0210814	0.019512	0.0212692	0.0232554	0.0189951	0.0185185	0.0246233	0.0214179	0.027314	0.033203	0.0272911	0.0161108	0.022149	0.0177911	0.0221592	0.0147837
Otu0000731	0	0	0.00211979	0.00210799	0.00329576	0.000879415	0.00211037	0.000984581	0.0057607	0.00112182	0.00174119	0.00166585	0.00179937	0.00473302	0.00221423	0.0019912	0.00121677	0.00519988	0.00184836	0.00157272	0	0.00400529	0.00124832	0.00838826	0.00165373	0.000800448	0.00257635	0.00261997	0.000859875	0.00124875	0.00425876	0	0.00556969	0.00641607	0.00410779	0	0.000801912	0	0.00115741	0	0.00194708	0.00352438	0.00491896	0.00419864	0.00302078	0.00177192	0.00266866	0.00147728	0.0492789
Otu0000732	0.0251392	0.0137134	0.0148385	0.0196745	0.0230703	0.0114324	0.0179382	0.0177225	0.0134416	0.0112182	0.0162511	0.0133268	0.0251912	0.0181432	0.0143925	0.0139384	0.0170347	0.00935979	0.0184836	0.0141545	0.0137094	0.0110145	0.0174764	0.00718993	0.0206716	0.0176099	0.0154581	0.0174665	0.0197771	0.0231019	0.0119245	0.0135538	0.0129959	0.0238311	0.018485	0.0111943	0.0176421	0.0099974	0.0173611	0.00861814	0.0214179	0.0132164	0.0221353	0.0199435	0.0231593	0.0115175	0.0186806	0.0162501	0.0320313
Otu0000733	0.00864162	0.00783622	0.00423958	0.00843194	0.013183	0.010553	0.0200485	0.00689207	0.0192023	0.00785273	0.0145099	0.010828	0.00719748	0.0126214	0.00774979	0.004978	0.0316359	0.0114397	0.0129385	0	0.00456981	0.0140185	0.0087382	0.0119832	0.00826863	0.00640359	0.0120229	0.0130999	0.0240765	0.014985	0.0144798	0.00338845	0.00742625	0.0100824	0.00513473	0.0156721	0.0168401	0.00899766	0.0127315	0.00369349	0.00876185	0.0123353	0.0147569	0.0115463	0.00503464	0.0115175	0.0106746	0.00295456	0.0254608
Otu0000734	0.0518497	0.0284063	0.0572343	0.0259985	0.0346055	0.0299001	0.0179382	0.0216608	0.0364844	0.0302891	0.0383062	0.0266536	0.0458839	0.0323423	0.0210352	0.0308636	0.0194683	0.0280794	0.0212561	0.0125818	0.0217066	0.0170225	0.019973	0.0143799	0.0413432	0.0424238	0.0317749	0.0401729	0.0498727	0.0443307	0.0332183	0.0254134	0.0334181	0.0485788	0.0369701	0.0369413	0.0280669	0.0299922	0.0289352	0.0320102	0.025312	0.0246707	0.0172164	0.0136456	0.0453117	0.0265788	0.0231284	0.0206819	0.0221755
Otu0000735	0.0251392	0.0323244	0.0349765	0.0337278	0.0255422	0.0334178	0.0253245	0.0452907	0.0172821	0.0415073	0.0348238	0.032484	0.0215924	0.043386	0.0265707	0.0268812	0.0255521	0.0218395	0.025877	0.0314545	0.0239915	0.0410542	0.0274629	0.0227681	0.0264596	0.0384215	0.0326337	0.0139732	0.0395542	0.0162338	0.0366254	0.0271076	0.0334181	0.0384964	0.0236198	0.0347024	0.0296707	0.0399896	0.037037	0.0270856	0.0331003	0.0281951	0.0381219	0.0241422	0.0362494	0.0301226	0.0293553	0.0206819	0.0057492
Otu0000736	0.0408513	0.0342835	0.0413359	0.0295118	0.0436688	0.0404531	0.0242693	0.0403678	0.0470457	0.0527255	0.0325022	0.0274865	0.0575798	0.0489079	0.0332134	0.0368372	0.0304192	0.044719	0.0314221	0.0314545	0.0422707	0.0340449	0.043691	0.0227681	0.0396894	0.0584327	0.0360688	0.034933	0.0378345	0.0324675	0.0391806	0.0288018	0.0380595	0.0357467	0.0359431	0.0235081	0.0376899	0.0629836	0.0277778	0.0467842	0.037968	0.0713688	0.0381219	0.0335891	0.0392702	0.0292367	0.0453672	0.0251138	0.00821315
Otu0000737	0.00628481	0.00587717	0.0158984	0.0274038	0.0041197	0.00351766	0.0126622	0.0167379	0.00192023	0.0134618	0.00638436	0.0183243	0.00809717	0.00394418	0.00664268	0.0109516	0.0036503	0.00831981	0.0120143	0.0110091	0.00799717	0.00500661	0.0149798	0.0131815	0.00826863	0.00320179	0.00343513	0.0174665	0.0034395	0.00874126	0.00681402	0.0110125	0.00371312	0.00274975	0.0256737	0.0123138	0.00240573	0	0.0127315	0.00984931	0.00389416	0.00528658	0.00860818	0.0188939	0.00302078	0.0168332	0.0142328	0.0177274	0.057492
Otu0000738	0.00785601	0.0156724	0.0137786	0.0133506	0.0197746	0.0158295	0.0105519	0.00689207	0.0182422	0.00785273	0.0197335	0.0158256	0.0134953	0.0212986	0.0132854	0.009956	0.0255521	0.0249594	0.0147869	0.0125818	0.012567	0.0110145	0.0149798	0.0107849	0.0140567	0.0120067	0.0145993	0.0235798	0.0240765	0.0262238	0.0187386	0.00762402	0.0139242	0.0137487	0.0164312	0.0212692	0.0120287	0.00899766	0.0127315	0.00984931	0.012656	0.0140975	0.0172164	0.0178442	0.0181247	0.0124034	0.0124537	0.00295456	0.0328526
Otu0000739	0.0306385	0.0264473	0.0317968	0.0231878	0.0387252	0.0193471	0.0200485	0.0295374	0.0441654	0.0213145	0.0354042	0.032484	0.0287899	0.0299758	0.0110711	0.0219032	0.0231186	0.0239195	0.0397398	0.0408908	0.0342736	0.0340449	0.0337045	0.040743	0.0198447	0.0208117	0.0249047	0.0235798	0.0232166	0.0355894	0.0400324	0.0160951	0.0334181	0.0201648	0.0277276	0.0324635	0.0368879	0.0299922	0.0219907	0.0270856	0.0282326	0.0211463	0.0233651	0.0241422	0.0241663	0.021263	0.0302448	0.0118182	0.015605
Otu0000740	0.0424225	0.0430992	0.0307369	0.043565	0.0642674	0.0483678	0.0538145	0.0492291	0.0518463	0.0437509	0.0371454	0.0366486	0.0287899	0.0552185	0.048713	0.0268812	0.0377198	0.0249594	0.0295738	0.0267363	0.0308462	0.025033	0.0399461	0.0299581	0.0446506	0.0408229	0.0541033	0.0314397	0.0421339	0.0462038	0.0468464	0.0321903	0.0621948	0.0384964	0.0441587	0.0402996	0.0433032	0.0319917	0.0393519	0.0320102	0.0691213	0.0528658	0.0430409	0.0304401	0.0453117	0.0372103	0.049815	0.0325001	0.013141
Otu0000741	0.00628481	0.00489764	0.00741926	0.00210799	0.00247182	0.00263824	0.00527593	0.00492291	0.00288035	0.00673091	0.00580397	0.00499754	0.00359874	0.00315535	0.00221423	0.0059736	0.00851737	0.00311993	0.00277254	0.00314545	0.00571226	0.00300396	0.00624157	0.00479329	0.00496118	0.00480269	0.00601147	0.0034933	0.00257962	0.00437063	0.00936928	0.00508268	0.00185656	0.00549949	0.00718863	0.00223886	0.00481147	0.00299922	0.00462963	0.00615582	0.00194708	0.00176219	0.00122974	0.00419864	0.00201386	0.000885959	0.00177911	0.00147728	0.0468149
Otu0000742	0.0141408	0.0195906	0.0233177	0.0323224	0.0082394	0.00967356	0.0158278	0.0324912	0.0057607	0.01234	0.0197335	0.0258206	0.0134953	0.0086772	0.00996402	0.0278768	0.0109509	0.0135197	0.0194078	0.0188727	0.0114245	0.0100132	0.0087382	0.0179748	0.00744177	0.0200112	0.027481	0.0384263	0.00859875	0.0131119	0.0221456	0.0330374	0.00928281	0.0137487	0.0225928	0.0391801	0.0120287	0.0179953	0.0219907	0.0443219	0.0155766	0.0132164	0.0221353	0.0262415	0.0161108	0.0203771	0.0169015	0.0147728	0.00246394
Otu0000743	0.0542065	0.0450583	0.0180182	0.0231878	0.0321337	0.0342972	0.0295452	0.0275683	0.032644	0.0426291	0.0354042	0.0508084	0.0386865	0.0268204	0.0376418	0.0278768	0.0292024	0.0343192	0.025877	0.0314545	0.0411283	0.0330436	0.0187247	0.0227681	0.0355551	0.0328184	0.0291986	0.0358063	0.0283759	0.0368382	0.0315148	0.029649	0.0259919	0.0256643	0.0277276	0.0324635	0.0280669	0.0369904	0.0173611	0.0307791	0.0223914	0.0308384	0.028284	0.0335891	0.0251732	0.0327805	0.0373612	0.0325001	0.0057492
Otu0000744	0.0267105	0.0284063	0.0307369	0.0259985	0.0123591	0.025503	0.0253245	0.0216608	0.024963	0.0224364	0.0243767	0.0224889	0.0179937	0.0220874	0.0154996	0.0129428	0.0109509	0.0259994	0.0184836	0.0173	0.0137094	0.0130172	0.0174764	0.0107849	0.0206716	0.0120067	0.0291986	0.0244531	0.0146179	0.014985	0.0204421	0.0194836	0.0120677	0.0302472	0.0267006	0.0179109	0.0160382	0.0129966	0.0173611	0.0307791	0.0146031	0.0105732	0.0356625	0.0209932	0.0130901	0.021263	0.0311344	0.0251138	0.0205329
Otu0000745	0.0204256	0.0117543	0.0222578	0.0126479	0.0230703	0.0140706	0.0242693	0.011815	0.0268833	0.0190709	0.0203139	0.0149926	0.0224921	0.0212986	0.0221423	0.0169252	0.0304192	0.0291193	0.020332	0.0125818	0.0239915	0.0170225	0.0174764	0.0275614	0.0231522	0.0136076	0.0214695	0.0235798	0.0232166	0.0174825	0.0187386	0.015248	0.0194939	0.0174151	0.0174581	0.0123138	0.0192459	0.0189951	0.0115741	0.00861814	0.025312	0.0211463	0.0122974	0.0178442	0.014097	0.0248069	0.025797	0.0192046	0.0221755
Otu0000746	0.0102128	0.0146929	0.0307369	0.0105399	0.00988729	0.025503	0.0221589	0.00492291	0.0115214	0.02468	0.0150903	0.00749631	0.00719748	0.0276093	0.0354276	0.0129428	0.0109509	0.0155997	0.0175594	0.0125818	0.0148519	0.028037	0.0187247	0.00838826	0.0132298	0.030417	0.0343513	0.0174665	0.00859875	0.0237263	0.0195903	0.0169423	0.00649797	0.0155819	0.0349162	0.0100749	0.0104249	0.0209945	0.0243056	0.0332414	0	0.0326006	0.00122974	0.0220428	0.0161108	0.022149	0.0284657	0.0325001	0.0106771
Otu0000747	0.0290673	0.0235087	0.0158984	0.0161612	0.0247182	0.021106	0.016883	0.0147687	0.0316839	0.0213145	0.0162511	0.0133268	0.0305893	0.0157767	0.0221423	0.0278768	0.0182515	0.0218395	0.00739344	0.0157272	0.0159943	0.0320423	0.0162281	0.0167765	0.0272865	0.0224126	0.0300574	0.0235798	0.0197771	0.0143606	0.0119245	0.0186365	0.0278484	0.0320804	0.0246467	0.0167915	0.0192459	0.0199948	0.0243056	0.0307791	0.012656	0.0290762	0.0159866	0.0293905	0.014097	0.0248069	0.0204597	0.026591	0.0172476
Otu0000748	0.00392801	0.101871	0.113409	0.0850221	0.00906335	0.117842	0.0833597	0.00196916	0.00288035	0.0785273	0.00406278	0.087457	0.0665767	0.00709953	0.10739	0.0388284	0.104642	0.0998378	0.00277254	0.0786361	0.00685471	0.00300396	0.00748989	0.0491312	0.00413432	0.00480269	0.0772904	0.0829658	0.096306	0.00686813	0.00596227	0.00338845	0.00371312	0.00183316	0.00410779	0.0033583	0.00481147	0.00599844	0.0694444	0.00369349	0.0048677	0.00440548	0.00368922	0.0314898	0.00201386	0.0044298	0.0489254	0.00147728	0.00164263
Otu0000749	0.0259248	0.0205701	0.0254375	0.0238905	0.0313097	0.0158295	0.0411523	0.0344604	0.032644	0.0168273	0.0325022	0.0191572	0.0215924	0.0276093	0.0321063	0.0388284	0.015818	0.0218395	0.0378914	0.0157272	0.0217066	0.0220291	0.0212214	0.0179748	0.0248059	0.0152085	0.0188932	0.0244531	0.0318154	0.0224775	0.0306631	0.0288018	0.0287767	0.0302472	0.0267006	0.0291052	0.0449071	0.0219943	0.03125	0.0332414	0.0233649	0.0299573	0.0233651	0.0335891	0.0292009	0.0230349	0.0507045	0.0325001	0.00492789
Otu0000750	0.0581345	0.051915	0.0529947	0.0484837	0.0486125	0.0598002	0.0411523	0.0443062	0.0451255	0.0538473	0.0371454	0.0374816	0.0683761	0.0496967	0.0498201	0.0358416	0.0498874	0.043679	0.0351189	0.0534726	0.0502679	0.0570753	0.0499326	0.0227681	0.0454775	0.0616345	0.0455154	0.0515261	0.0670702	0.0474525	0.0323666	0.037273	0.0185656	0.0302472	0.0318354	0.0358218	0.0368879	0.0369904	0.0335648	0.0332414	0.0408886	0.0581523	0.0418112	0.0272911	0.0563879	0.0487278	0.0320239	0.0206819	0.00246394
Otu0000751	0.0023568	0.00293858	0.00423958	0.00632396	0.00494364	0.00175883	0.00316556	0.00393833	0.000960117	0.00897455	0.00290198	0.00666339	0.00179937	0.000788836	0.00110711	0.0039824	0	0.00311993	0.00092418	0	0	0.00801057	0.00124832	0.00359497	0.00165373	0.00320179	0.00257635	0.00698659	0.00171975	0.0024975	0.00340701	0.00592979	0.00371312	0.00458291	0.00308084	0.00447773	0.00160382	0.00199948	0.00115741	0.00738698	0.000973539	0.00264329	0	0.00419864	0.00302078	0.00797363	0.00711643	0.00443184	0.0254608
Otu0000752	0.0267105	0.0274268	0.0307369	0.0203772	0.0222464	0.0184677	0.033766	0.0226454	0.0220827	0.0201927	0.0174119	0.0183243	0.0260909	0.0197209	0.0143925	0.0159296	0.0182515	0.0176796	0.0184836	0.0173	0.0182792	0.0240317	0.0187247	0.0155782	0.0231522	0.0272152	0.0257635	0.0227064	0.0223567	0.0318432	0.0315148	0.0271076	0.0148525	0.0256643	0	0.00783603	0.0168401	0.00199948	0.0185185	0.0160051	0.0272591	0.0202652	0.0233651	0.0251918	0.0261801	0.0194911	0.0320239	0.0221592	0.0402444
Otu0000753	0.0494929	0.00293858	0.0445156	0.00772928	0.0955771	0.0580414	0.045373	0.0689207	0.041285	0.00224364	0.0504945	0.00499754	0.0575798	0.00315535	0.00332134	0.000995599	0.00121677	0	0.00184836	0.00157272	0.073117	0.00300396	0.00124832	0.00119832	0.00826863	0.00240135	0.0558208	0.0916991	0.0713696	0.0686813	0.0638814	0.00254134	0.046414	0.0467457	0.00205389	0.0716437	0.0569357	0.0649831	0.00462963	0	0.000973539	0.00176219	0.00491896	0.00419864	0.00503464	0.00177192	0.00266866	0	0.000821315
Otu0000754	0.011784	0.00195906	0.0105989	0.0147559	0.0107112	0.00703532	0.0073863	0.0137841	0.00672082	0.00897455	0.00928634	0.0133268	0.0125956	0.0118325	0.00553557	0.009956	0.00608384	0.0103998	0.0120143	0.0141545	0.0137094	0.00500661	0.019973	0.00838826	0.0066149	0.0120067	0.0103054	0.00873324	0.006879	0.00374625	0.017035	0.0110125	0.00742625	0.0119156	0.0112964	0.0167915	0.0144344	0.00699818	0.00694444	0.00492465	0.00584124	0.00881096	0.0061487	0.0052483	0.0120831	0.0115175	0.00978508	0.0162501	0.00821315
Otu0000755	0	0	0	0	0	0	0.00105519	0	0	0	0.000580397	0	0	0	0	0	0	0	0	0	0.00114245	0	0	0	0	0	0	0.00174665	0	0	0	0	0	0	0	0	0	0	0	0.00123116	0	0	0	0	0	0	0.000889553	0	0
Otu0000756	0.0204256	0.0440788	0.0476953	0.0309171	0.0197746	0.0386942	0.0242693	0.030522	0.0268833	0.0179491	0.0330826	0.0249877	0	0.0323423	0.0309992	0.019912	0.0121677	0.0166396	0.00092418	0.0188727	0.0217066	0.0320423	0.00124832	0	0.000826863	0.0248139	0.0377864	0.0340596	0.0240765	0.0231019	0.0221456	0.0313432	0.0120677	0.0247477	0.0328623	0.0425384	0.0280669	0.0169956	0	0.00123116	0.000973539	0.0290762	0.00368922	0.0241422	0.00201386	0.0044298	0.0249075	0.0206819	0.00492789
Otu0000757	0.0188544	0.0195906	0.0127187	0.0231878	0.0230703	0.01495	0.0221589	0.0344604	0.00672082	0.00785273	0.0174119	0.0191572	0.0161943	0.0173544	0.0132854	0.0139384	0.0219018	0.0291193	0.0295738	0.0173	0.012567	0.0130172	0.0112348	0.0203715	0.0148835	0.0208117	0.019752	0.0314397	0.00945862	0.0224775	0.0281078	0.0228721	0.0194939	0.0174151	0.0205389	0.0268664	0.018444	0.0199948	0.0162037	0.0295479	0.0155766	0.0123353	0.0319732	0.0304401	0.0332286	0.0301226	0.0275761	0.0413638	0.00164263
Otu0000758	0.0290673	0.0235087	0.0158984	0.0147559	0.0189506	0.021106	0.0232141	0.0127996	0.0134416	0.0190709	0.0179923	0.0141597	0.0260909	0.0173544	0.00664268	0.0119472	0.0182515	0.0228795	0.0175594	0.0110091	0.0205641	0.0190251	0.00998652	0.00958658	0.023979	0.0336188	0.027481	0.0157198	0.0171975	0.0174825	0.017035	0.0160951	0.0222787	0.0201648	0.018485	0.0257469	0.0168401	0.0219943	0.0115741	0.0270856	0.0292062	0.0193841	0.0209056	0.0262415	0.0261801	0.0283507	0.0142328	0.0221592	0.00985578
Otu0000759	0.0164976	0.0205701	0.0180182	0.0267011	0.0255422	0.00703532	0.0263797	0.0157533	0.0182422	0.0235582	0.0237963	0.0291523	0.0242915	0.0181432	0.0121782	0.0219032	0.0231186	0.0228795	0.0157111	0.0173	0.022849	0.0270357	0.0187247	0.0191732	0.0231522	0.0136076	0.0283398	0.034933	0.0154777	0.0262238	0.0229973	0.0254134	0.0278484	0.0174151	0.0225928	0.0291052	0.0280669	0.0139964	0.0173611	0.014774	0.0204443	0.0149786	0.0172164	0.0178442	0.0161108	0.0124034	0.0311344	0.0280683	0.0229968
Otu0000760	0.015712	0.0342835	0.0423958	0.0323224	0.0230703	0.00175883	0.0432626	0.0226454	0.00960117	0.0157055	0.0284394	0.0291523	0.0125956	0.0283981	0.0309992	0.0189164	0.0182515	0.0155997	0.0157111	0.0204454	0.0148519	0.0190251	0.00998652	0.00838826	0.0173641	0	0.0343513	0.0375529	0.0214969	0.0255994	0.0281078	0.0313432	0.00928281	0.0256643	0.0215659	0.00671659	0.0152363	0.00099974	0	0.0283168	0.0175237	0.018503	0.0184461	0.0167945	0.014097	0.0168332	0.0222388	0.0206819	0.0164263
Otu0000761	0.0243536	0.0176315	0.020138	0.0168639	0.0197746	0.0272619	0.0158278	0.0137841	0.0153619	0.0235582	0.0174119	0.0199902	0.0323887	0.0197209	0.0143925	0.0268812	0.0194683	0.0187196	0.0166352	0.0251636	0.0274189	0.0260344	0.0187247	0.0191732	0.0140567	0.0184103	0.0240459	0.0305664	0.0120382	0.0268482	0.017035	0.0364259	0.0129959	0.0210814	0.0328623	0.0201498	0.0216516	0.0279927	0.0289352	0.0517089	0.0194708	0.0211463	0.0307435	0.0346388	0.0151039	0.0292367	0.0195702	0.0236365	0.00410657
Otu0000762	0.0298529	0.0205701	0.020138	0.0168639	0.0263661	0.01495	0.0211037	0.0167379	0.0307237	0.0168273	0.0185727	0.0166585	0.0278902	0.0181432	0.0221423	0.0268812	0.0121677	0.0301593	0.0147869	0.0267363	0.0239915	0.0210278	0.00998652	0.0251648	0.0148835	0.0200112	0.0163169	0.0209598	0.0232166	0.0193556	0.0340701	0.0237192	0.0185656	0.0320804	0.0236198	0.0223886	0.0232554	0.0309919	0.0243056	0.0467842	0.0321268	0.018503	0.0356625	0.0304401	0.027187	0.0239209	0.0302448	0.0162501	0.00492789
Otu0000763	0.0219968	0.0107748	0.0243776	0.0231878	0.0107112	0.01495	0.0179382	0.0206762	0.0268833	0.0179491	0.0249571	0.0233219	0.0152946	0.0134102	0.0143925	0.0179208	0.0133844	0.0280794	0.0147869	0.00157272	0.00913962	0.0300397	0.0262146	0.0275614	0.018191	0.00800448	0.0154581	0.0157198	0.027516	0.0181069	0.0229973	0.0237192	0.0129959	0.0164985	0.0215659	0.0201498	0.0192459	0.00699818	0.0185185	0.0283168	0.0292062	0.0176219	0.0159866	0.0251918	0.0191316	0.022149	0.033803	0.0325001	0.00657052
Otu0000764	0.0015712	0.00293858	0.00211979	0.049889	0.0041197	0.00175883	0.00105519	0.000984581	0.00768093	0.00112182	0.00174119	0.0624693	0.00179937	0.0520632	0	0	0.0036503	0.00311993	0	0.0110091	0.00114245	0.00100132	0	0.00239665	0.0587073	0.0016009	0.000858782	0.00261997	0.00257962	0.00561938	0.00255526	0.0669219	0.000928281	0.00183316	0.0482665	0.00447773	0.00400956	0	0.0439815	0.0590958	0.0710684	0.0493414	0.0418112	0.00209932	0.0533672	0.0531576	0.00266866	0.00295456	0.044351
Otu0000765	0.01964	0.0313449	0.0243776	0.0210799	0.0346055	0.0334178	0.0211037	0.0265837	0.0134416	0.0213145	0.0232159	0.0174914	0.00989654	0.0315535	0.0309992	0.0129428	0.0425868	0.0249594	0.0286496	0.028309	0.0297038	0.025033	0.0299596	0.0227681	0.0314208	0.0336188	0.0309161	0.0314397	0.0361147	0.0206044	0.0417359	0.0127067	0.0259919	0.0146653	0.0205389	0.0212692	0.0256612	0.0159958	0.0347222	0.0172363	0.025312	0.0343627	0.0307435	0.0188939	0.0261801	0.0141753	0.0169015	0.0118182	0.0213542
Otu0000766	0.0282817	0.0107748	0.0243776	0.0210799	0.0164788	0.0140706	0.0211037	0.011815	0.0220827	0.0168273	0.0191531	0.0116609	0.0179937	0.0149879	0.0143925	0.0079648	0.0109509	0.0187196	0.0110902	0.0110091	0.0239915	0.0230304	0.0174764	0.0119832	0.018191	0.0136076	0.0094466	0.0165932	0.0163376	0.0243506	0.0161833	0.0118596	0.0157808	0.010999	0.0164312	0.0111943	0.0216516	0.0109971	0.0150463	0.00984931	0.0175237	0.00969206	0.00737844	0.00944693	0.0191316	0.0106315	0.016012	0.0132955	0.0246394
Otu0000767	0.0455649	0.0362425	0.0317968	0.0259985	0.0362534	0.0501266	0.0422075	0.0295374	0.0288035	0.0347764	0.0342434	0.0366486	0.034188	0.0299758	0.0254636	0.0388284	0.0401533	0.0270394	0.0443607	0.0377453	0.0297038	0.0400529	0.0549258	0.0263631	0.0396894	0.0528296	0.0309161	0.0340596	0.0300956	0.0324675	0.0340701	0.0415085	0.0491989	0.0293306	0.0297815	0.0201498	0.0304726	0.0249935	0.0393519	0.0332414	0.0301797	0.0484603	0.033203	0.046185	0.0231593	0.0372103	0.0213493	0.026591	0.0139624
Otu0000768	0.0267105	0.0254677	0.0190781	0.00772928	0.0181267	0.0228648	0.0211037	0.018707	0.024963	0.0190709	0.0150903	0.0249877	0.0206928	0.0283981	0.0232494	0.0278768	0.0316359	0.0249594	0.020332	0.0298817	0.0171368	0.0190251	0.0262146	0.0215698	0.0223253	0.0280157	0.0171756	0.0218331	0.0197771	0.0187313	0.0204421	0.0228721	0.0278484	0.0229145	0.039024	0.0145526	0.0256612	0.0309919	0.0208333	0.0369349	0.0389416	0.0422926	0.0258245	0.0272911	0.028194	0.0256928	0.025797	0.0339774	0.00164263
Otu0000769	0.0219968	0.0313449	0.029677	0.0182692	0.0329576	0.0395737	0.0263797	0.0334758	0.0220827	0.0157055	0.0249571	0.0191572	0.0215924	0.0291869	0.0243565	0.0318592	0.020685	0.0291193	0.020332	0.0220181	0.025134	0.0230304	0.0274629	0.0263631	0.0231522	0.0280157	0.0206108	0.0314397	0.0240765	0.0280969	0.0315148	0.0237192	0.023207	0.0265809	0.019512	0.0347024	0.027265	0.0509867	0.025463	0.0406284	0.0311533	0.0299573	0.0368922	0.0283408	0.028194	0.0318945	0.0249075	0.036932	0.00328526
Otu0000770	0.0243536	0.035263	0.0286172	0.0288091	0.028014	0.0299001	0.0327108	0.042337	0.041285	0.0258018	0.039467	0.0291523	0.0188934	0.0347088	0.0376418	0.0288724	0.0401533	0.0322393	0.0323463	0.0141545	0.0308462	0.028037	0.0337045	0.0287597	0.0289402	0.0272152	0.0326337	0.0331863	0.0292357	0.0280969	0.0476981	0.0262605	0.0408444	0.0137487	0.0297815	0.0313441	0.0481147	0.0349909	0.03125	0.0246233	0.036021	0.0326006	0.0393517	0.0272911	0.0332286	0.0283507	0.0409194	0.0354547	0.0139624
Otu0000771	0.0251392	0.0235087	0.0317968	0.0175665	0.0337816	0.0307795	0.0189934	0.0206762	0.0220827	0.0258018	0.0284394	0.0183243	0.0296896	0.0197209	0.0232494	0.0189164	0.0316359	0.0280794	0.0378914	0.0173	0.0331311	0.0200264	0.0262146	0.0155782	0.0305939	0.0264148	0.0291986	0.0305664	0.0352549	0.034965	0.0204421	0.0245663	0.0315616	0.0366633	0.0359431	0.0212692	0.0352841	0.0339912	0.0358796	0.0160051	0.037968	0.0317195	0.0209056	0.0115463	0.0302078	0.0318945	0.0249075	0.0221592	0.0188902
Otu0000772	0.0015712	0.000979528	0.0392161	0.00210799	0.00082394	0.0184677	0.011607	0.0157533	0.0134416	0.0201927	0.0185727	0.0233219	0.00269906	0.0141991	0.0221423	0.000995599	0.0182515	0.0135197	0.0175594	0.0125818	0.0194217	0.0090119	0.00124832	0.0143799	0.0206716	0.0264148	0.0283398	0.0209598	0.0189172	0.0206044	0.0212938	0.0254134	0.00185656	0.000916582	0.0102695	0.0145526	0.0408975	0.0279927	0.0162037	0.0320102	0	0.00528658	0.0159866	0.0409367	0.0191316	0.0301226	0.00177911	0.0295456	0.013141
Otu0000773	0.00707041	0.0137134	0.00953905	0.00772928	0.00494364	0.00527649	0.00949668	0.0147687	0.0115214	0.0145836	0.00754515	0.00999509	0.00809717	0.00709953	0.00332134	0.0059736	0.00608384	0.0145597	0.00739344	0.00314545	0.0137094	0.00700925	0.00748989	0.0119832	0.00826863	0.0104058	0.00601147	0.0130999	0.006879	0.00874126	0.00766577	0.0203307	0.00742625	0.0119156	0.00205389	0.0123138	0.0120287	0	0.0115741	0.00861814	0.00973539	0.0114542	0.0061487	0.0104966	0.0100693	0.00531576	0.00889553	0.0073864	0.0197116
Otu0000774	0.023568	0.0146929	0.0148385	0.0196745	0.0082394	0.0158295	0.016883	0.0157533	0.0220827	0.0190709	0.0226355	0.0149926	0.0242915	0.0126214	0.0121782	0.0169252	0.00851737	0.0207995	0.0277254	0.0157272	0.0102821	0.0210278	0.0087382	0.0167765	0.0206716	0.00880493	0.0154581	0.0192131	0.0249364	0.0243506	0.0221456	0.0211778	0.0222787	0.0192482	0.0205389	0.0190303	0.0256612	0.0179953	0.0104167	0.0110805	0.000973539	0.0220274	0.0172164	0.0272911	0.0211455	0.0115175	0.0177911	0.026591	0.0172476
Otu0000775	0.104485	0	0.00211979	0.0252958	0.0725068	0.0272619	0.062256	0	0.000960117	0.0549691	0.0516553	0.0199902	0.080072	0.000788836	0.00221423	0.000995599	0.0973414	0.0613586	0.0794795	0.0330272	0.0628349	0.0660872	0.00124832	0.037148	0.0636685	0.0016009	0	0.0331863	0.0748091	0.0686813	0.0340701	0.0440499	0.0937564	0.000916582	0.00821558	0	0.0553319	0.045988	0.00115741	0.0344726	0.0846979	0.0317195	0.0602573	0.0608802	0.0654503	0.000885959	0.0702747	0.0487502	0.00739183
Otu0000776	0.0204256	0.016652	0.0243776	0.0126479	0.0164788	0.0114324	0.0137174	0.0137841	0.0134416	0.0157055	0.0179923	0.0174914	0.0179937	0.0157767	0.0177138	0.0418152	0.0146012	0.0187196	0.0138627	0.028309	0.0137094	0.0160211	0.0162281	0.0227681	0.0206716	0.0224126	0.0137405	0.0218331	0.0180574	0.0168581	0.0119245	0.0211778	0.00928281	0.0100824	0.0205389	0.0145526	0.0104249	0.0219943	0.0173611	0.0418595	0.0204443	0.0211463	0.0245948	0.0272911	0.0161108	0.0106315	0.0222388	0.0339774	0.00164263
Otu0000777	0.00785601	0.00293858	0.0105989	0.00562129	0.00741546	0.00703532	0.0105519	0.00295374	0.0057607	0.00448727	0.0191531	0.000832924	0.00899685	0.0102549	0.00664268	0.0069692	0.0121677	0.00415991	0.0092418	0.00314545	0.0114245	0.00801057	0.0087382	0.00718993	0.0066149	0.00400224	0.00601147	0.00174665	0.00773887	0.0106144	0.00851752	0	0	0.0100824	0.00308084	0.0111943	0.00400956	0.00199948	0.0138889	0.00492465	0.00389416	0.00528658	0.00983792	0.0104966	0.00604157	0.00531576	0.00978508	0.00295456	0.0361378
Otu0000778	0.00942722	0.0107748	0.00211979	0.00772928	0.0082394	0.00791473	0.0073863	0.00590749	0.00480058	0.00224364	0.00522357	0.00416462	0.00809717	0.00552185	0.00110711	0.009956	0.00608384	0.00623986	0.00277254	0.00471817	0.0114245	0.00500661	0.00374494	0.00119832	0.00578804	0.00560314	0.0094466	0.00523995	0.00515925	0.00624376	0.00596227	0.00508268	0.00371312	0.00733266	0.00924252	0.00671659	0.00641529	0.00699818	0.00347222	0.00861814	0.00778831	0.000881096	0.00737844	0.00839727	0.00402771	0.00885959	0.00889553	0.00590912	0.0328526
Otu0000779	0.0329953	0.0254677	0.0222578	0.0281065	0.0247182	0.0158295	0.0200485	0.0285529	0.024963	0.0224364	0.0255374	0.0241548	0.000899685	0.0110437	0.0188209	0.0209076	0.0231186	0	0.0341947	0.0235908	0.025134	0.0290383	0.0337045	0.0311564	0.0272865	0.0200112	0.0326337	0.0227064	0.0120382	0.0293457	0.0264043	0.0321903	0.0241353	0.0192482	0.0359431	0.049255	0.0376899	0.0159958	0.00231482	0.0381661	0.0408886	0.0246707	0.0270543	0.00104966	0.0332286	0.0256928	0.0284657	0.00443184	0.00985578
Otu0000780	0.0109984	0.0205701	0.0148385	0.0161612	0.0321337	0.0386942	0.0189934	0.0285529	0.0172821	0.0201927	0.0197335	0.0191572	0.0107962	0.0268204	0.0166067	0.0219032	0.0328527	0.0135197	0.0175594	0.0314545	0.0205641	0.0160211	0.023718	0.0167765	0.0264596	0.0184103	0.0180344	0.0305664	0.0214969	0.014985	0.017035	0.0186365	0.0129959	0.0155819	0.0164312	0.0179109	0.0232554	0.0299922	0.0185185	0.0160051	0.0223914	0.0229085	0.0209056	0.0188939	0.0161108	0.0248069	0.0124537	0.0206819	0.0205329
Otu0000781	0.00471361	0.0117543	0.0158984	0.0133506	0.0115352	0.0123118	0.00422074	0.00689207	0.00288035	0.00785273	0.0145099	0.0149926	0.00809717	0.00946604	0.00885691	0.004978	0.0182515	0.00727984	0.00831762	0.00786361	0.0114245	0.0090119	0.0124831	0.00718993	0.0066149	0.00560314	0.0128817	0.00436662	0.00945862	0.0187313	0.00766577	0.00762402	0.00556969	0.0100824	0.00924252	0.00783603	0.00801912	0.00599844	0.0104167	0.00738698	0.00584124	0.00616767	0.0110677	0.00629796	0.00906235	0.00797363	0.00889553	0.00590912	0.0427084
Otu0000782	0.011784	0.00881575	0.00847916	0.0091346	0.0082394	0.0167089	0.0137174	0.00787665	0.00768093	0.01234	0.00754515	0.0116609	0.0116959	0.00709953	0.00996402	0.00896039	0.00973414	0.0135197	0.0120143	0.0141545	0.012567	0.00500661	0.00998652	0.00838826	0.00744177	0.0120067	0.00429391	0.0104799	0.00773887	0.00874126	0.00851752	0.00338845	0.00371312	0.00916582	0.00718863	0.00559716	0.00962294	0.0049987	0.0115741	0.00984931	0.00389416	0.00969206	0.00983792	0.00944693	0.00302078	0.00974555	0.00978508	0.0073864	0.0295673
Otu0000783	0.00785601	0.0117543	0.00741926	0.00983726	0.0115352	0.0140706	0.0126622	0.00984582	0.0153619	0.0100964	0.00812555	0.00832924	0.00809717	0.00788836	0.0177138	0.0079648	0.0146012	0.00831981	0.0110902	0.00314545	0.00799717	0.0140185	0.00624157	0.00239665	0.0165373	0.0136076	0.00772904	0.00698659	0.0180574	0.00936563	0.010221	0.0101654	0.0111394	0.00733266	0.00513473	0.0145526	0.00801912	0.00699818	0.0104167	0.00861814	0.0136295	0.0176219	0.00983792	0.00314898	0.0100693	0.00708767	0.00711643	0.00295456	0.0295673
Otu0000784	0.0227824	0.0215496	0.0158984	0.0168639	0.0164788	0.0193471	0.0200485	0.0354449	0.0172821	0.0224364	0.0174119	0.0133268	0.0224921	0.0276093	0.019928	0.0209076	0.0231186	0.0343192	0.0268012	0.0251636	0.0148519	0.0180238	0.0274629	0.0311564	0.0206716	0.0208117	0.0163169	0.0227064	0.0171975	0.024975	0.013628	0.0203307	0.0222787	0.0265809	0.0102695	0.0145526	0.0200478	0.0139964	0.0138889	0.0221609	0.0146031	0.0211463	0.0307435	0.0283408	0.0181247	0.0203771	0.0151224	0.0147728	0.0106771
Otu0000785	0.0345665	0.0382016	0.0254375	0.0252958	0.0288379	0.0307795	0.0263797	0.0275683	0.0307237	0.0291673	0.0301806	0.0174914	0.0413855	0.0236651	0.0243565	0.0258856	0.0316359	0.0259994	0.0406639	0.0487544	0.0399858	0.031041	0.0249663	0.0119832	0.0297671	0.0360202	0.0360688	0.029693	0.0232166	0.0287213	0.0264043	0.0321903	0.0213505	0.0329969	0.0297815	0.0436579	0.0240574	0.0439886	0.0277778	0.0357037	0.0418622	0.0334817	0.0221353	0.0283408	0.0312148	0.0248069	0.0240179	0.0295456	0.0057492
Otu0000786	0.0102128	0.0137134	0.020138	0.0267011	0.0115352	0.0140706	0.0189934	0.0196916	0.0105613	0.00897455	0.0168315	0.0224889	0.00899685	0.0126214	0.0154996	0.0268812	0.0121677	0.0197596	0.0138627	0.0298817	0.012567	0.00801057	0.0174764	0.0191732	0.00744177	0.0152085	0.0163169	0.00873324	0.006879	0.0131119	0.0153315	0.0127067	0.00464141	0.00824924	0.0205389	0.0145526	0.0112268	0.0119969	0.0115741	0.0233921	0.0048677	0.0140975	0.0209056	0.0157449	0.0100693	0.0230349	0.0177911	0.0132955	0.00410657
Otu0000787	0.023568	0.0225291	0.0127187	0.0203772	0.0222464	0.0202265	0.0158278	0.00787665	0.0220827	0.00673091	0.0133491	0.00666339	0.0179937	0.0134102	0.0154996	0.0179208	0.0219018	0.0145597	0.0249529	0.0188727	0.0194217	0.0120159	0.0137315	0.00838826	0.0173641	0.0128072	0.0163169	0.0113532	0.020637	0.0255994	0.0195903	0.0101654	0.0194939	0.0201648	0.0164312	0.00671659	0.0128306	0.0179953	0.0127315	0.00984931	0.0175237	0.0123353	0.0209056	0.0199435	0.0181247	0.0115175	0.0213493	0.010341	0.0427084
Otu0000788	0.0353521	0.0254677	0.0222578	0.0302145	0.0354294	0.0307795	0.0411523	0.0334758	0.0384047	0.0325327	0.0423689	0.0358157	0.0305893	0.0268204	0.0376418	0.0438064	0.0194683	0.0322393	0.0388156	0.0408908	0.0239915	0.0400529	0.0187247	0.0239664	0.0372088	0.0248139	0.0369276	0.0445395	0.041274	0.0430819	0.0442911	0.0321903	0.0278484	0.0265809	0.0328623	0.0481356	0.0392937	0.022994	0.0474537	0.0307791	0.0272591	0.0237896	0.0356625	0.0262415	0.0292009	0.0389822	0.0409194	0.0310229	0.00985578
Otu0000789	0.0534209	0.0391811	0.0561744	0.0295118	0.0379013	0.0351766	0.0369315	0.0344604	0.0288035	0.0381418	0.0412082	0.033317	0.0458839	0.0449637	0.0498201	0.0368372	0.0401533	0.046799	0.0471332	0.0487544	0.0468405	0.0370489	0.0524292	0.0503295	0.0454775	0.0568318	0.0334925	0.0270731	0.0404141	0.0374625	0.0315148	0.0220249	0.0380595	0.039413	0.0297815	0.0324635	0.0392937	0.053986	0.0520833	0.0517089	0.036021	0.0652011	0.0577978	0.0419864	0.0513533	0.0504997	0.0382508	0.0339774	0.00739183
Otu0000790	0.0322097	0.0470173	0.0328567	0.0365384	0.0453167	0.0448501	0.0295452	0.0344604	0.0393648	0.0392636	0.0354042	0.0366486	0.0530814	0.043386	0.00664268	0.0338504	0.0316359	0.0395191	0.0397398	0.045609	0.0548377	0.0370489	0.00249663	0.0467346	0.0429969	0.0488273	0.0403627	0.0541461	0.0447135	0.0355894	0.0434394	0.0389672	0.0427009	0.0449125	0.0318354	0.0324635	0.0449071	0.0439886	0.0543981	0.00246233	0.0467299	0.0396493	0.0405814	0.046185	0.0473256	0.0398682	0.041809	0.00443184	0.000821315
Otu0000791	0.0212112	0.0225291	0.0317968	0.0393491	0.0181267	0.0281413	0.0295452	0.0403678	0.0144018	0.0201927	0.027859	0.054973	0.0161943	0.0197209	0.0110711	0.0129428	0.0170347	0.0114397	0.0138627	0.0141545	0.0205641	0.0180238	0.0174764	0.0119832	0.0206716	0.0288161	0.0583972	0.0506528	0.0240765	0.0305944	0.0340701	0.052521	0.0250636	0.028414	0.0503204	0.0470162	0.0216516	0.0159958	0.0185185	0.0184674	0.0194708	0.0167408	0.0258245	0.0220428	0.0241663	0.022149	0.0195702	0.0192046	0.0139624
Otu0000792	0.0164976	0.0333039	0.0243776	0.0358357	0.0370773	0.0281413	0.0506489	0.0157533	0.0240029	0.0179491	0.0452709	0.0291523	0.0323887	0.0370753	0.0287849	0.0129428	0.0389365	0.0259994	0.0295738	0.0314545	0.0182792	0.0230304	0.0187247	0.00599161	0.0248059	0.023213	0.0429391	0.0218331	0.0369746	0.0324675	0.0315148	0.0160951	0.0139242	0.0174151	0.0225928	0.0279858	0.0224535	0.0139964	0.0289352	0.0123116	0.012656	0.0149786	0.0159866	0.00944693	0.0161108	0.0159473	0.0240179	0.0132955	0.0320313
Otu0000793	0.0141408	0.0362425	0.0392161	0.0316198	0.0230703	0.0325383	0.0400971	0.0561211	0.0220827	0.03702	0.0296002	0.0499754	0.0152946	0.0244539	0.0431774	0.0408196	0.00973414	0.0270394	0.0212561	0.0581907	0.0274189	0.0230304	0.0349528	0.0575195	0.0198447	0.0336188	0.027481	0.0384263	0.0361147	0.0162338	0.0195903	0.0457441	0.0222787	0.0164985	0.0174581	0.0291052	0.018444	0.022994	0.0208333	0.0320102	0.0233649	0.0431737	0.0221353	0.0314898	0.0312148	0.0203771	0.0222388	0.0206819	0.00410657
Otu0000794	0.0267105	0.018611	0.0137786	0.0182692	0.0263661	0.0184677	0.0147726	0.018707	0.0201625	0.0280455	0.0168315	0.0199902	0.0323887	0.0205097	0.0143925	0.0238944	0.0316359	0.0228795	0.0157111	0.0220181	0.035416	0.0260344	0.0287112	0.0167765	0.0305939	0.0216121	0.0249047	0.0288197	0.0300956	0.0237263	0.0212938	0.0338845	0.0343464	0.0201648	0.0246467	0.0268664	0.0400956	0.0279927	0.0231481	0.0344726	0.036021	0.027314	0.0307435	0.0346388	0.0322217	0.0248069	0.0373612	0.0177274	0.0139624
Otu0000795	0.0298529	0.0225291	0.0137786	0.0175665	0.0354294	0.0184677	0.0189934	0.011815	0.0220827	0.0134618	0.0156707	0.0191572	0.0359874	0.0212986	0.00885691	0.00896039	0.0243353	0.0166396	0.0157111	0.0110091	0.0388434	0.0170225	0.00624157	0.0167765	0.0223253	0.0144081	0.0240459	0.0227064	0.034395	0.0156094	0.0221456	0.0211778	0.0250636	0.021998	0.0123234	0.0145526	0.0328784	0.0099974	0.0185185	0.0221609	0.0184972	0.0176219	0.0172164	0.0251918	0.0231593	0.0168332	0.0169015	0.0192046	0.0123197
Otu0000796	0.0290673	0.035263	0.0286172	0.0442677	0.0387252	0.0334178	0.0348211	0.0275683	0.0432053	0.0190709	0.0580397	0.0308182	0.0206928	0.0268204	0.0354276	0.034846	0.0547545	0.044719	0.0351189	0.0345999	0.0285613	0.0350463	0.0337045	0.0287597	0.0339014	0.0176099	0.0145993	0.034933	0.0455734	0.034965	0.0434394	0.0237192	0.0204222	0.0320804	0.0359431	0.033583	0.0320765	0.0249935	0.025463	0.0184674	0.0136295	0.0158597	0.0270543	0.0146952	0.0231593	0.0283507	0.0462568	0.0236365	0.0106771
Otu0000797	0.0133552	0.0146929	0.0127187	0.0161612	0.014007	0.0228648	0.0137174	0.0108304	0.0192023	0.0168273	0.0185727	0.0174914	0.0125956	0.0212986	0.0121782	0.0129428	0.0219018	0.0176796	0.0138627	0.00471817	0.022849	0.0190251	0.0249663	0.0203715	0.0140567	0.0192108	0.0111642	0.0209598	0.0163376	0.01998	0.0238491	0.0110125	0.0185656	0.010999	0.0143773	0.0201498	0.0176421	0.0189951	0.0219907	0.00984931	0.00681477	0.0167408	0.0122974	0.0104966	0.00704849	0.0106315	0.0106746	0.00886368	0.0328526
Otu0000798	0.0204256	0.0137134	0.0158984	0.00632396	0.014007	0.0184677	0.00633112	0.00590749	0.0134416	0.01234	0.00812555	0.0141597	0.0224921	0.0126214	0.0132854	0.014934	0.0182515	0.0135197	0.0092418	0.0235908	0.022849	0.0140185	0.0137315	0.0191732	0.0157104	0.0224126	0.0137405	0.0130999	0.0154777	0.0112388	0.010221	0.0127067	0.0167091	0.0192482	0.0102695	0.0100749	0.0232554	0.0209945	0.00462963	0.0184674	0.0194708	0.0123353	0.0172164	0.00419864	0.0221524	0.0203771	0.0106746	0.0295456	0.00410657
Otu0000799	0.01964	0.016652	0	0.0119452	0.0123591	0	0.0200485	0.0137841	0.0172821	0.0190709	0.0116079	0.0166585	0.014395	0.0173544	0.0132854	0.0129428	0	0.0176796	0.010166	0.0173	0	0	0.0262146	0.0143799	0.0173641	0	0.0103054	0	0.013758	0.0112388	0.0178868	0.0101654	0.0139242	0	0.0154042	0.0123138	0.0232554	0.0169956	0.0162037	0.0135428	0.00973539	0.018503	0.00983792	0.00944693	0.0171178	0.0132894	0	0.0177274	0.0435297
Otu0000800	0.015712	0.00979528	0.00847916	0.00281065	0.013183	0.0061559	0.00844149	0.00196916	0.00864105	0.0168273	0.00580397	0.00499754	0.0197931	0.0118325	0.00442845	0.0059736	0.0073006	0.00519988	0.010166	0.00943634	0.0182792	0.0160211	0.00998652	0.00599161	0.0140567	0.016009	0.0103054	0.00698659	0.00945862	0.00999001	0.00681402	0.0067769	0.0120677	0.0128321	0.0102695	0.0134332	0.0160382	0.00799792	0.0138889	0.00738698	0.0107089	0.0167408	0.0122974	0.0146952	0.0151039	0.0044298	0.0151224	0.0132955	0.0213542
Otu0000801	0.0188544	0.0225291	0.0169583	0.0267011	0.0247182	0.025503	0.0348211	0.0196916	0.0230428	0.0291673	0.0348238	0.0249877	0.0224921	0.0220874	0.0254636	0.0228988	0.0219018	0.0363992	0.025877	0.0141545	0.0399858	0.0300397	0.023718	0.0239664	0.0256328	0.0144081	0.0111642	0.0235798	0.0386944	0.0305944	0.0366254	0.029649	0.0269201	0.0183316	0.018485	0.0268664	0.0248593	0.0219943	0.0243056	0.0123116	0.0204443	0.0158597	0.0221353	0.0157449	0.027187	0.0239209	0.0266866	0.0295456	0.0262821
Otu0000802	0.0212112	0.0342835	0.0211979	0.0210799	0.0197746	0.0193471	0.0147726	0.0196916	0.0220827	0.0190709	0.0203139	0.0199902	0.0224921	0.0141991	0.0177138	0.0189164	0.0231186	0.0249594	0.0157111	0.0157272	0.00799717	0.0110145	0.0149798	0.00958658	0.0124029	0.0280157	0.0257635	0.0253264	0.013758	0.0118631	0.0204421	0.0321903	0.0129959	0.0155819	0.0205389	0.0358218	0.0208497	0.0289925	0.0196759	0.0233921	0.0136295	0.027314	0.0295138	0.0262415	0.014097	0.022149	0.00978508	0.010341	0.0147837
Otu0000803	0.0212112	0.0264473	0.0254375	0.0393491	0.0164788	0.021106	0.0358763	0.0246145	0.0201625	0.0258018	0.0214747	0.0349828	0.0233918	0.0212986	0.0143925	0.0268812	0.0170347	0.0280794	0.0314221	0.0125818	0.0148519	0.0230304	0.0386978	0.0179748	0.0190179	0.0184103	0.027481	0.0200865	0.0214969	0.0268482	0.0229973	0.0211778	0.0167091	0.0146653	0.0287545	0.0235081	0.0104249	0.0209945	0.03125	0.0233921	0.0165502	0.0105732	0.0233651	0.0283408	0.0181247	0.0203771	0.0213493	0.0310229	0.00903446
Otu0000804	0.0384945	0.000979528	0.00105989	0.0632396	0.00329576	0.00175883	0.00527593	0.0876277	0.00192023	0.0504818	0.0835771	0.0691327	0.00269906	0.0717841	0.00110711	0.0029868	0.0608384	0.043679	0.0619201	0.0471817	0.0022849	0.00400529	0.0349528	0.00119832	0.0330745	0.0752421	0.0772904	0.0532728	0.06879	0.0661838	0.0988033	0.08217	0.000928281	0.00183316	0.00102695	0.0593299	0.00400956	0.0809789	0.0729167	0.0701763	0.0691213	0.0484603	0.0713249	0.0703272	0.00100693	0.0044298	0.000889553	0.0664776	0.00164263
Otu0000806	0.0102128	0.0254677	0.0487552	0.0428624	0.0115352	0.0158295	0.0263797	0.0344604	0.0134416	0.0280455	0.0197335	0.033317	0.0134953	0.0212986	0.0265707	0.0358416	0.00973414	0.0155997	0.0166352	0.0361726	0.0137094	0.0190251	0.0174764	0.0311564	0.0165373	0.0200112	0.0231871	0.0331863	0.0103185	0.0243506	0.0195903	0.0237192	0.00928281	0.021998	0.0503204	0.0369413	0.00641529	0.0329914	0.0127315	0.0184674	0.0155766	0.0246707	0.0196758	0.0167945	0.00402771	0.022149	0.0142328	0.0162501	0.0057492
Otu0000807	0.0455649	0.0450583	0.00317968	0.0365384	0.0379013	0.000879415	0.00105519	0.0689207	0.0518463	0.00224364	0.0441101	0.000832924	0.000899685	0.0489079	0.00332134	0	0.0279856	0.0270394	0.0378914	0.0503271	0.025134	0.0510674	0.00624157	0.033553	0	0	0	0.0611327	0.0515925	0.00124875	0	0	0.00278484	0	0.00205389	0.00223886	0.00160382	0.00099974	0	0.00246233	0	0.00176219	0.0455004	0.00314898	0	0.0345524	0.0400299	0	0.0336739
Otu0000808	0.0102128	0.00489764	0.0116588	0.0168639	0.0041197	0.00967356	0.0105519	0.0147687	0.0057607	0.00673091	0.0127687	0.0174914	0.00809717	0.0102549	0.00332134	0.00896039	0.00608384	0.00623986	0.010166	0.00786361	0.0022849	0.0120159	0.00499326	0.0107849	0.00248059	0.00960538	0.00601147	0.0200865	0.00601912	0.0106144	0.00596227	0.0211778	0.00742625	0.00824924	0.0174581	0.0156721	0.00240573	0.0049987	0.00810185	0.00984931	0.0048677	0.00264329	0.00737844	0.0136456	0.0151039	0.0132894	0.0124537	0.0132955	0.0197116
Otu0000809	0.00785601	0.0195906	0.0127187	0.0105399	0.00659152	0.0158295	0.0105519	0.0147687	0.00672082	0.0224364	0.00870595	0.010828	0.00809717	0.0157767	0.00885691	0.0189164	0.00851737	0.0114397	0.00739344	0.0173	0.00685471	0.00600793	0.0112348	0.0179748	0.0115761	0.0152085	0.0154581	0.0113532	0.00601912	0.0168581	0.010221	0.0160951	0.00835453	0.0128321	0.0154042	0.0134332	0.00882103	0.00899766	0.0138889	0.0123116	0.0107089	0.0220274	0.0159866	0.0209932	0.0130901	0.0168332	0.00622687	0.0192046	0.0123197
Otu0000810	0.0400657	0.0333039	0.0254375	0.0302145	0.0337816	0.0272619	0.0242693	0.0265837	0.0278434	0.0426291	0.0261178	0.0258206	0.0458839	0.03392	0.0343205	0.0338504	0.0279856	0.0405591	0.0397398	0.028309	0.0377009	0.028037	0.0337045	0.0263631	0.0256328	0.0424238	0.0326337	0.0340596	0.0283759	0.0324675	0.0383289	0.0330374	0.0334181	0.0458291	0.0349162	0.0246275	0.036086	0.0429888	0.0335648	0.0381661	0.0331003	0.027314	0.0381219	0.0367381	0.0292009	0.0292367	0.025797	0.0177274	0.00492789
Otu0000811	0.023568	0.0205701	0.0211979	0.0161612	0.0164788	0.0193471	0.0232141	0.0226454	0.0268833	0.02468	0.0232159	0.0241548	0.0152946	0.0165656	0.019928	0.0228988	0.0231186	0.0228795	0.0157111	0.0188727	0.0182792	0.0200264	0.0212214	0.0275614	0.0256328	0.0240134	0.0163169	0.0200865	0.0292357	0.0231019	0.0127763	0.0228721	0.0157808	0.0201648	0.0143773	0.0324635	0.018444	0.0259932	0.0266204	0.0209298	0.0321268	0.0202652	0.028284	0.0157449	0.027187	0.022149	0.0204597	0.0325001	0.0172476
Otu0000812	0.0392801	0.0323244	0.0169583	0.00702662	0.0296619	0.00175883	0.0242693	0.00689207	0.0288035	0.0235582	0.00174119	0.00416462	0.0440846	0.0181432	0.0143925	0.0079648	0.0316359	0.00103998	0.0221803	0.0125818	0.0217066	0.00200264	0.00124832	0.0131815	0.00248059	0.0192108	0.0240459	0.000873324	0	0.024975	0.000851752	0.0228721	0.0306333	0.021998	0.00205389	0.00895546	0.0296707	0.00099974	0.0324074	0.00492465	0.0233649	0.0237896	0.0356625	0.00419864	0.041284	0.0239209	0.000889553	0.00147728	0.00328526
Otu0000813	0.0212112	0.0342835	0.020138	0.0217825	0.0247182	0.0228648	0.0179382	0.030522	0.0220827	0.0179491	0.0237963	0.021656	0.0269906	0.0244539	0.0265707	0.0268812	0.0304192	0.0280794	0.0268012	0.0314545	0.0217066	0.025033	0.0249663	0.0251648	0.0214984	0.0248139	0.0180344	0.0227064	0.020637	0.01998	0.0323666	0.0169423	0.0269201	0.021998	0.0256737	0.0291052	0.0200478	0.0219943	0.0162037	0.0320102	0.0243385	0.0308384	0.0184461	0.0293905	0.0261801	0.0292367	0.033803	0.0147728	0.00492789
Otu0000814	0.0447793	0.0470173	0.0476953	0.0393491	0.0477885	0.0536443	0.033766	0.0383987	0.0652879	0.0448727	0.0406278	0.043312	0.0431849	0.043386	0.0464988	0.019912	0.0352862	0.0405591	0.0415881	0.0267363	0.0434132	0.0410542	0.0486843	0.0287597	0.0413432	0.0680381	0.0446567	0.0305664	0.0378345	0.0280969	0.0383289	0.0567566	0.0399161	0.0540783	0.037997	0.041419	0.036086	0.053986	0.0451389	0.0320102	0.0389416	0.0466981	0.0541086	0.0314898	0.0352425	0.0522716	0.0364717	0.0502275	0
Otu0000815	0.0282817	0.0450583	0.029677	0.0147559	0.042021	0.0386942	0.0379867	0.02363	0.0345642	0.0437509	0.0348238	0.021656	0.0377868	0.038653	0.0265707	0.014934	0.0413701	0.0353592	0.0351189	0.0251636	0.035416	0.0300397	0.0386978	0.0215698	0.0438237	0.0280157	0.0266222	0.0192131	0.0584715	0.0287213	0.0315148	0.00847113	0.0427009	0.0238311	0.0256737	0.0223886	0.0280669	0.0359906	0.0277778	0.00984931	0.0272591	0.0466981	0.0344327	0.0188939	0.0312148	0.0363243	0.0293553	0.00590912	0.00821315
Otu0000816	0.0534209	0.035263	0.0317968	0.0224852	0.0354294	0.0492472	0.0390419	0.0334758	0.0432053	0.02468	0.0481729	0.0208231	0.0296896	0.0410195	0.0298921	0.0219032	0.0328527	0.0301593	0.036043	0.0173	0.0388434	0.0360476	0.0424427	0.0239664	0.0438237	0.0400224	0.0420803	0.0331863	0.0352549	0.0374625	0.0400324	0.029649	0.0584817	0.0439959	0.0287545	0.033583	0.0569357	0.0509867	0.025463	0.0369349	0.0477034	0.0502225	0.0307435	0.0283408	0.0543741	0.0372103	0.0364717	0.0354547	0.00985578
Otu0000817	0.0243536	0.0244882	0.0211979	0.0252958	0.0321337	0.025503	0.0327108	0.0354449	0.0220827	0.01234	0.0249571	0.0208231	0.0161943	0.0268204	0.0232494	0.0219032	0.0486707	0.0176796	0.0221803	0.0173	0.0217066	0.0120159	0.0287112	0.033553	0.0281133	0.0120067	0.0154581	0.0218331	0.0283759	0.0287213	0.0340701	0.0194836	0.0204222	0.0247477	0.018485	0.0369413	0.0344822	0.0149961	0.0208333	0.0123116	0.0214179	0.0123353	0.028284	0.0178442	0.0221524	0.0203771	0.0195702	0.0162501	0.0164263
Otu0000818	0	0.00587717	0.160044	0.105399	0	0.01495	0.247969	0.140795	0	0.0100964	0.171797	0.0882899	0	0.0362865	0.0453916	0.0139384	0	0.00727984	0.195926	0.0188727	0	0.0110145	0.114845	0.0239664	0.000826863	0	0	0.000873324	0	0.000624376	0	0	0.000928281	0.000916582	0.00102695	0	0.000801912	0.00099974	0	0	0	0	0	0	0	0	0	0	0
Otu0000819	0	0.0401606	0.0487552	0.0463757	0.0453167	0.0668355	0.0369315	0.0531674	0.0364844	0	0.0475925	0.044145	0.017094	0.0560074	0.0719624	0.034846	0.0340695	0.0384791	0.0323463	0.0330272	0.0205641	0.0450595	0.0324562	0.0395446	0.0372088	0	0.0437979	0.0410462	0	0.0387113	0.0545122	0.0262605	0.0380595	0.0494954	0.0328623	0.0358218	0.0408975	0.0409893	0.0543981	0.0196986	0	0.0440548	0.0430409	0.0262415	0.0362494	0.0496137	0.0240179	0	0.00492789
Otu0000820	0.0463505	0.0450583	0.0392161	0.00140532	0.0354294	0.0474884	0.0580352	0.0393833	0	0.0426291	0.0510749	0.0491425	0.0413855	0.0394418	0.0420703	0.0457976	0.0340695	0.044719	0.0332705	0.0345999	0.0159943	0.0430568	0.0362011	0.0179748	0.0479581	0.0448251	0.0532445	0.0427929	0.0464332	0.0468282	0.0459946	0.0330374	0.0417726	0.0439959	0.0359431	0.0470162	0.0489166	0.0439886	0.037037	0.0320102	0.0399151	0.0326006	0.033203	0.0377877	0.0352425	0.0318945	0.0426985	0.0398865	0
Otu0000821	0.0267105	0.0244882	0.0286172	0.0400517	0.0263661	0.0325383	0.0274348	0.0403678	0.0268833	0.0224364	0.0185727	0.0349828	0.0215924	0.0149879	0.019928	0.0228988	0.0231186	0.0176796	0.0304979	0.0251636	0.0217066	0.0200264	0.0212214	0.0323547	0.0190179	0.0168094	0.0163169	0.0279464	0.0257962	0.0287213	0.0204421	0.0228721	0.0185656	0.0164985	0.0102695	0.0279858	0.0216516	0.0249935	0.0266204	0.0233921	0.0175237	0.0255518	0.0221353	0.0251918	0.0241663	0.0203771	0.0293553	0.0325001	0.00164263
Otu0000822	0.0227824	0.0176315	0.0190781	0.0112426	0.0115352	0.0175883	0.0126622	0.00886123	0.024963	0.0168273	0.0174119	0.0133268	0.0269906	0.00946604	0.0110711	0.0169252	0.0219018	0.0207995	0.0157111	0.0110091	0.0194217	0.0270357	0.0149798	0.0167765	0.0198447	0.0208117	0.0120229	0.0148465	0.00171975	0.0137363	0.0178868	0.0144009	0.0167091	0.0183316	0.0123234	0.0100749	0.0168401	0.0209945	0.0208333	0.0172363	0.0107089	0.0132164	0.0147569	0.0115463	0.0251732	0.0159473	0.0177911	0.0206819	0.0336739
[truncated: 14,339 more rows]
[truncated: 60 more columns]
