# Supplementary material for: The Active Sulfate-Reducing Microbial Community in Littoral Sediment of Oligotrophic Lake Constance
Source: Front Microbiol. 2019 Feb 13;10:247. doi: 10.3389/fmicb.2019.00247 (PMC6381063; doi:10.3389/fmicb.2019.00247)
Supplement: TABLE S2 — Summary of all 16S rRNA (gene) OTUs at the approximate species-level (97% identity), which were affiliated to recognized lineages of sulfate-reducing microorganisms. For each OTU, the phylogenetic affiliation, the mean relative abundance at the 16S rRNA gene and 16S rRNA level in the initial sediment, and the change in relative abundance at the 16S rRNA gene and 16S rRNA level in the various treatments (provided as slope of a linear regression and the respective R2-value) is given. [file Table_2.XLSX]

## Sheet: All_SRM_16S
OTU	Domain	Phylum	Class	Order	Family	Genus		Mean (%)	Std. Dev.		Mean (%)	Std. Dev.		Mean_DNA (%)					Mean_DNA (%)					Mean_DNA (%)					Mean_DNA (%)					Mean_RNA (%)					Mean_RNA (%)					Mean_RNA (%)					Mean_RNA (%)
								DNA_intial_sediment			RNA_initial_sediment			Chitin & sulfate					Chitin only					Sulfate only					Control					Chitin & sulfate					Chitin only					Sulfate only					Control
														initial sediment	9 days	21 days	43 days		initial sediment	9 days	21 days	43 days		initial sediment	9 days	21 days	43 days		initial sediment	9 days	21 days	43 days		native sediment	9 days	21 days	43 days		initial sediment	9 days	21 days	43 days		initial sediment	9 days	21 days	43 days		initial sediment
Otu0000010	Bacteria	Proteobacteria	Deltaproteobacteria	Desulfobacterales	Desulfobacteraceae	unclassified		0.548456	0.0626849		0.924385	0.164069		0.54909	0.57352	0.67891	0.890788		0.489091	0.622959	0.680317	0.627924		0.550438	0.651696	0.7479	0.952854		0.605204	0.661422	0.618391	0.674028		0.726621	0.770062	1.03232	0.856594		0.864386	0.643571	0.711068	0.520478		0.993893	1.01009	1.04146	0.681385		1.11264
Otu0000017	Bacteria	Proteobacteria	Deltaproteobacteria	Desulfobacterales	Desulfobacteraceae	unclassified		0.405564	0.0730444		0.576321	0.0846312		0.389392	0.272906	0.332391	0.386819		0.350013	0.429868	0.453152	0.454399		0.428736	0.372585	0.410516	0.453611		0.454117	0.361223	0.45288	0.442911		0.535426	0.376184	0.579287	0.466291		0.529496	0.382863	0.487823	0.39221		0.584524	0.452603	0.547697	0.456504		0.655837
Otu0000021	Bacteria	Proteobacteria	Deltaproteobacteria	Desulfobacterales	Desulfobacteraceae	unclassified		0.315794	0.048174		0.263916	0.0281398		0.279177	0.258641	0.26758	0.339993		0.322632	0.286526	0.307994	0.319731		0.30878	0.304097	0.324247	0.402692		0.352587	0.299682	0.321668	0.397242		0.24688	0.301643	0.380606	0.437583		0.27194	0.322819	0.284986	0.256863		0.264397	0.396758	0.375009	0.445015		0.272446
Otu0000030	Bacteria	Proteobacteria	Deltaproteobacteria	Syntrophobacterales	Syntrophobacteraceae	Syntrophobacter		0.0919061	0.00987222		0.520204	0.0721657		0.0930723	0.0713901	0.0853685	0.0839144		0.0873658	0.0889727	0.0835337	0.0845918		0.0935002	0.0732429	0.0816163	0.0943752		0.0936861	0.0731446	0.0865132	0.0954772		0.448836	0.491963	0.537079	0.574707		0.541196	0.504747	0.477987	0.391028		0.539523	0.61566	0.60753	0.466383		0.55126
Otu0000073	Bacteria	Proteobacteria	Deltaproteobacteria	Desulfobacterales	Desulfobacteraceae	unclassified		0.159981	0.0248832		0.107582	0.0183797		0.152391	0.146759	0.16097	0.204827		0.144568	0.172016	0.185969	0.170233		0.168742	0.161579	0.181511	0.228516		0.174223	0.20282	0.187283	0.191417		0.0991988	0.118009	0.178587	0.155838		0.098105	0.0982639	0.0955293	0.073553		0.117418	0.118074	0.132802	0.105005		0.115604
Otu0000082	Bacteria	Proteobacteria	Deltaproteobacteria	Syntrophobacterales	Syntrophobacteraceae	unclassified		0.103787	0.0160066		0.162598	0.0116446		0.104584	0.103641	0.0927424	0.122096		0.104452	0.109385	0.0960316	0.0844977		0.0968594	0.122959	0.117399	0.0941365		0.109253	0.105283	0.111375	0.0897196		0.161021	0.216582	0.242295	0.352912		0.164724	0.23842	0.156953	0.182825		0.169769	0.214131	0.182762	0.179682		0.15488
Otu0000167	Bacteria	Proteobacteria	Deltaproteobacteria	Desulfobacterales	Desulfobacteraceae	unclassified		0.0755883	0.0158833		0.111792	0.0213026		0.0791105	0.0480413	0.0527193	0.0470132		0.0678359	0.0555467	0.0633136	0.0572869		0.0735676	0.0612649	0.0576026	0.0604386		0.0818392	0.0666394	0.0629768	0.0570104		0.101602	0.084119	0.115349	0.0857534		0.121842	0.0710107	0.0769708	0.049619		0.106031	0.0977561	0.109961	0.0703676		0.117694
Otu0000181	Bacteria	Proteobacteria	Deltaproteobacteria	Desulfobacterales	Desulfobulbaceae	Desulfobulbus		0.0196229	0.0074654		0.061574	0.0161112		0.0176605	0.0395995	0.0463798	0.0484114		0.0247038	0.0379831	0.0337993	0.0368778		0.0164517	0.0440517	0.0461445	0.042444		0.0196756	0.0310552	0.0293313	0.0410844		0.0610211	0.158962	0.120404	0.124257		0.0787442	0.15703	0.0944876	0.113676		0.0485457	0.147699	0.113814	0.127075		0.0579852
Otu0000202	Bacteria	Proteobacteria	Deltaproteobacteria	Syntrophobacterales	Syntrophobacteraceae	Syntrophobacter		0.0244778	0.0409474		0.104306	0.0620871		0.00235318	0.0202576	0.0231563	0.0502051		0.0236602	0.0016485	0.0301125	0.000524241		0.00321107	0.000624376	0.00153873	0.0388838		0.0686866	0.0411855	0.0292629	0.00168463		0.130619	0.114137	0.164681	0.503518		0.106893	0.0583859	0.0917611	0.0511142		0.0925626	0.00267354	0.116319	0.0587581		0.0871493
Otu0000240	Bacteria	Proteobacteria	Deltaproteobacteria	Syntrophobacterales	Syntrophobacteraceae	unclassified		0.0599977	0.0379769		0.0339476	0.0540455		0.0896703	0.0362172	0.0552767	0.0825229		0.0382484	0.0912599	0.0479413	0.0657102		0.0821044	0.061888	0.0709381	0.0738822		0.0299679	0.018752	0.0479012	0.0770319		0.00329718	0.0576158	0.0494761	0.00717029		0.0452843	0.116779	0.0460668	0.119065		0.0468017	0.148835	0.0653119	0.13689		0.0404071
Otu0000248	Bacteria	Proteobacteria	Deltaproteobacteria	Desulfobacterales	Desulfobacteraceae	unclassified		0.0633632	0.00896421		0.0688998	0.00781124		0.0727816	0.0402175	0.054985	0.0586793		0.0565065	0.0627973	0.0636934	0.0644927		0.0616309	0.048305	0.0665594	0.0783209		0.0625336	0.0566132	0.0726166	0.0647988		0.0683712	0.0478024	0.0704567	0.059262		0.0671942	0.0611951	0.0613021	0.0553021		0.0684216	0.0516692	0.0711159	0.0645779		0.0716122
Otu0000333	Bacteria	Proteobacteria	Deltaproteobacteria	Desulfobacterales	Desulfobacteraceae	Desulfatirhabdium		0.040572	0.0197268		0.0300594	0.0121735		0.0298949	0.0541719	0.0613519	0.100418		0.0407222	0.0429017	0.022385	0.0348632		0.0546384	0.0522727	0.0719069	0.0746867		0.0370326	0.0450925	0.0511851	0.0571582		0.0170866	0.0492524	0.0620067	0.100698		0.040456	0.032605	0.0258662	0.0287446		0.0304341	0.0556525	0.0448591	0.0526044		0.032261
Otu0000367	Bacteria	Proteobacteria	Deltaproteobacteria	Syntrophobacterales	Syntrophobacteraceae	unclassified		0.02748	0.0047766		0.0392241	0.0108514		0.0251404	0.0237545	0.0280629	0.0221811		0.0296032	0.0221667	0.031167	0.018165		0.0254763	0.0269135	0.0275537	0.0234282		0.0297	0.0257281	0.0299745	0.0287085		0.0390738	0.0413023	0.0338249	0.0466196		0.0416513	0.0415298	0.0410952	0.0350135		0.033431	0.0538733	0.0526421	0.0443253		0.0427402
Otu0000388	Bacteria	Proteobacteria	Deltaproteobacteria	Syntrophobacterales	Syntrophobacteraceae	unclassified		0.0279404	0.00788672		0.0423154	0.00549269		0.0271478	0.0159026	0.0197645	0.031458		0.0226915	0.0310306	0.0305968	0.0214516		0.0247627	0.0246016	0.0285606	0.0229913		0.0371597	0.0228751	0.0348778	0.0224967		0.0386748	0.0399014	0.0580846	0.0710968		0.0411113	0.0570185	0.0450136	0.0423936		0.0439399	0.0601769	0.0501874	0.0533653		0.0455356
Otu0000417	Bacteria	Proteobacteria	Deltaproteobacteria	Desulfobacterales	Desulfobacteraceae	unclassified		0.0358354	0.00818919		0.0183477	0.00369749		0.0324363	0.0362219	0.0312126	0.0414077		0.0325501	0.034788	0.0358157	0.0358206		0.0376494	0.0307559	0.0353223	0.0410073		0.0407059	0.0358698	0.0447842	0.041093		0.0193242	0.0225502	0.0253886	0.0299908		0.0204164	0.0236048	0.0200066	0.0151216		0.0155544	0.0258776	0.0269318	0.0316443		0.0180956
Otu0000453	Bacteria	Proteobacteria	Deltaproteobacteria	Syntrophobacterales	Syntrophobacteraceae	unclassified		0.0423509	0.00775325		0.0261868	0.0051174		0.0479635	0.0287773	0.0294434	0.0281668		0.0327261	0.0421451	0.040517	0.0547525		0.0434189	0.0351815	0.0405937	0.0472229		0.0452952	0.0292882	0.0470214	0.0407298		0.0222809	0.0219498	0.0263847	0.0228257		0.0277532	0.0527886	0.0286956	0.0392937		0.0258189	0.0439636	0.0347042	0.0316454		0.028894
Otu0000469	Bacteria	Proteobacteria	Deltaproteobacteria	Desulfobacterales	Desulfobacteraceae	unclassified		0.0355011	0.00732254		0.0444711	0.00964309		0.0342131	0.0234741	0.0292638	0.0363046		0.0333649	0.0359321	0.0398719	0.0372685		0.0354044	0.0310535	0.0280514	0.0340993		0.0390222	0.029435	0.0369469	0.0390454		0.0489196	0.027598	0.0403085	0.0384592		0.041389	0.0327799	0.0378363	0.0333955		0.0436075	0.0339639	0.043932	0.0393764		0.0439683
Otu0000470	Bacteria	Proteobacteria	Deltaproteobacteria	Syntrophobacterales	Syntrophaceae	Desulfobacca		0.0110027	0.0136525		0.0595125	0.0117271		0.00692108	0.00762159	0.00624826	0.00566471		0	0.000262945	0.00503383	0.00132312		0.0117582	0.0114627	0.0104124	0.000573479		0.0253316	0.0112721	0.0050408	0		0.0608348	0.0244934	0.0469179	0.106968		0.0567958	0.0663667	0.0422836	0.0491375		0.0570082	0.0504712	0.0374573	0.0595883		0.0634114
Otu0000480	Bacteria	Proteobacteria	Deltaproteobacteria	Syntrophobacterales	Syntrophobacteraceae	unclassified		0.03814	0.00859773		0.0184742	0.00627163		0.0355352	0.0252431	0.0278141	0.035098		0.0333153	0.0415806	0.035543	0.0457991		0.0415891	0.032741	0.0401312	0.0382857		0.0421205	0.0230712	0.0396332	0.0466653		0.0139118	0.0160051	0.0240695	0.0295443		0.0248122	0.0309294	0.0238125	0.0315862		0.0187394	0.0283805	0.027491	0.0276005		0.0164336
Otu0000511	Bacteria	Proteobacteria	Deltaproteobacteria	Desulfobacterales	Desulfobulbaceae	Desulfocapsa		0.03529	0.00641627		0.0298597	0.00453973		0.0405584	0.031003	0.0369894	0.0392335		0.0328328	0.0283915	0.0301026	0.0217585		0.0318375	0.0262933	0.0348992	0.0386946		0.0359315	0.0194023	0.0310973	0.0205186		0.0306299	0.0378487	0.0376673	0.0443789		0.0264609	0.0521875	0.0324629	0.0406537		0.0337167	0.040187	0.0352443	0.0382743		0.0286311
Otu0000580	Bacteria	Proteobacteria	Deltaproteobacteria	Desulfobacterales	Desulfobacteraceae	unclassified		0.0398195	0.00658149		0.0196958	0.0146553		0.0374392	0.0170236	0.0207354	0.0264064		0.0334002	0.0352967	0.0265182	0.0311804		0.0443031	0.0315563	0.0115041	0.0470104		0.0441354	0.032962	0.035115	0.0306305		0.0184584	0.0240144	0.0300565	0.0356242		0.0212331	0.00602054	0.00666215	0.0135875		0.0182941	0.0103097	0.0323405	0.0188993		0.0207975
Otu0000626	Bacteria	Proteobacteria	Deltaproteobacteria	Desulfobacterales	Desulfobacteraceae	unclassified		0.0173981	0.00514024		0.0190542	0.00687963		0.0177456	0.0115105	0.0179398	0.0180619		0.0176665	0.0179435	0.0179993	0.018613		0.0138968	0.0214768	0.0208169	0.0276625		0.0202836	0.0170034	0.0216726	0.021188		0.0125058	0.0216625	0.0273279	0.0259957		0.0233592	0.0237534	0.0184773	0.0174009		0.0218606	0.0254453	0.0282232	0.0306348		0.0184912
Otu0000653	Bacteria	Proteobacteria	Deltaproteobacteria	Desulfobacterales	Desulfobulbaceae	Desulfobulbus		0.012517	0.00482371		0.0209254	0.00415009		0.0127306	0.018585	0.0198492	0.0273253		0.00974436	0.011107	0.0152129	0.00980513		0.0127783	0.017045	0.0201766	0.0208607		0.0148146	0.0133241	0.0136275	0.0205615		0.0189453	0.0325859	0.0483573	0.0482545		0.0237771	0.0533864	0.0333715	0.0419324		0.0175562	0.0463272	0.0466007	0.0558109		0.0234229
Otu0000663	Bacteria	Proteobacteria	Deltaproteobacteria	Syntrophobacterales	Syntrophobacteraceae	Syntrophobacter		0.0179593	0.00381607		0.0103888	0.00415698		0.0169401	0.0176209	0.0202356	0.024583		0.0151415	0.0147592	0.0187427	0.0244472		0.0197957	0.0180536	0.0222492	0.0255776		0.0199601	0.0194224	0.0217072	0.0176416		0.0104524	0.0164622	0.0218705	0.0333017		0.00858851	0.0141608	0.0114231	0.0162698		0.0102685	0.0165456	0.0134464	0.0151584		0.0122458
Otu0000754	Bacteria	Proteobacteria	Deltaproteobacteria	Syntrophobacterales	Syntrophobacteraceae	Syntrophobacter		0.00957365	0.00326436		0.0128135	0.00419706		0.00973869	0.00598964	0.00909053	0.0139556		0.0107963	0.00907964	0.0125076	0.0108329		0.00697338	0.00922285	0.012879	0.0121791		0.0107863	0.00910887	0.00762608	0.00880767		0.00967466	0.0218276	0.0338068	0.0480089		0.0189461	0.0178489	0.0272553	0.0303506		0.0110352	0.0228586	0.0275466	0.0256348		0.0115982
Otu0000759	Bacteria	Proteobacteria	Deltaproteobacteria	Syntrophobacterales	Syntrophobacteraceae	Syntrophobacter		0.0218035	0.00442806		0.0276767	0.00689523		0.020094	0.0170545	0.0227314	0.0238689		0.0234197	0.0226861	0.015538	0.0194588		0.0221594	0.0190822	0.0246433	0.0298172		0.0215407	0.0137928	0.0219039	0.0202288		0.0222624	0.0139509	0.0247315	0.0235935		0.0289446	0.0189207	0.0187161	0.0184072		0.0294484	0.0281924	0.0191733	0.0192097		0.0300514
Otu0000778	Bacteria	Proteobacteria	Deltaproteobacteria	Syntrophobacterales	Syntrophobacteraceae	Syntrophobacter		0.00674704	0.0023076		0.0293053	0.00528528		0.00748907	0.00697773	0.00490989	0.0059338		0.00853518	0.00558944	0.00254153	0.00529083		0.00488681	0.00639318	0.00821713	0.00567974		0.00607711	0.00557962	0.00658206	0.00764151		0.0319737	0.0286011	0.0428264	0.0527501		0.0303572	0.0327001	0.0312226	0.0309161		0.0297561	0.0250255	0.0276688	0.0322396		0.025134
Otu0000779	Bacteria	Proteobacteria	Deltaproteobacteria	Syntrophobacterales	Syntrophobacteraceae	unclassified		0.0255913	0.0108685		0.0124659	0.00532668		0.0275588	0.0212445	0.0226146	0.026938		0.0163841	0.0133607	0.0289067	0.0252183		0.0211533	0.0228684	0.0316604	0.0347172		0.037269	0.0221198	0.0192783	0.0145492		0.013987	0.00228686	0.00855713	0.0123107		0.00701683	0.0151018	0.00839857	0.00903529		0.0130983	0.0142947	0.00934708	0.00883259		0.0157615
Otu0000791	Bacteria	Proteobacteria	Deltaproteobacteria	Desulfobacterales	Desulfobacteraceae	unclassified		0.0202194	0.00333586		0.0161343	0.00413922		0.0179132	0.023621	0.0297337	0.0448966		0.0179311	0.0163948	0.0141367	0.0130268		0.0232706	0.0292749	0.0475959	0.0500633		0.0217629	0.0182952	0.0213044	0.019905		0.0162574	0.0284647	0.0434605	0.0545664		0.0175158	0.0171216	0.0103073	0.0116479		0.014656	0.0271923	0.0375967	0.0290048		0.0161081
Otu0000830	Bacteria	Proteobacteria	Deltaproteobacteria	Syntrophobacterales	Syntrophobacteraceae	Syntrophobacter		0.0134379	0.00367693		0.0144472	0.00334928		0.0103276	0.0065478	0.0122676	0.0221896		0.0135059	0.0128467	0.0104549	0.00880353		0.0139012	0.0114523	0.0160906	0.0149194		0.0160169	0.00917824	0.0122433	0.00831544		0.0123256	0.017591	0.0339669	0.068414		0.0136764	0.0144881	0.0110327	0.0115351		0.0167886	0.0155568	0.0175477	0.0178951		0.0149982
Otu0000854	Bacteria	Proteobacteria	Deltaproteobacteria	Syntrophobacterales	Syntrophobacteraceae	unclassified		0.0291088	0.00734205		0.0119984	0.00469575		0.0318473	0.0153511	0.0199718	0.0206383		0.0215146	0.0328713	0.0244986	0.0231153		0.0328074	0.0178788	0.0219582	0.0289378		0.030266	0.0207667	0.02927	0.0262505		0.00945745	0.0103224	0.0168184	0.0176114		0.0146522	0.0129017	0.0126678	0.00814502		0.0101571	0.0128375	0.0123805	0.012821		0.0137268
Otu0000892	Bacteria	Proteobacteria	Deltaproteobacteria	Syntrophobacterales	Syntrophobacteraceae	Syntrophobacter		0.013908	0.00281955		0.0155125	0.00447653		0.0140995	0.011061	0.0135256	0.0197591		0.0117875	0.013335	0.0178795	0.0174632		0.0133405	0.0104783	0.0176703	0.0139257		0.0164047	0.012075	0.0154789	0.015296		0.0167998	0.0163591	0.0194139	0.0113534		0.0143138	0.0188388	0.020112	0.0107953		0.0137545	0.0207002	0.0209412	0.0139636		0.0171818
Otu0000909	Bacteria	Proteobacteria	Deltaproteobacteria	Syntrophobacterales	Syntrophaceae	Desulfobacca		0.00708769	0.00289344		0.0297197	0.00541706		0.00597031	0.0051469	0.00461552	0.00709777		0.00489545	0.00592321	0.00695925	0.00723081		0.00877334	0.00383824	0.00831648	0.0059325		0.00871168	0.00508494	0.00702849	0.00653135		0.0341706	0.019619	0.0254312	0.0382515		0.0285089	0.0229979	0.0162004	0.0199384		0.0257405	0.0184517	0.0184631	0.02688		0.0304588
Otu0000916	Bacteria	Proteobacteria	Deltaproteobacteria	Syntrophobacterales	Syntrophobacteraceae	Syntrophobacter		0.00628565	0.00267843		0.0238391	0.00862232		0.00472849	0.00547011	0.00484733	0.00522686		0.00486407	0.00759316	0.00506699	0.0026359		0.00868372	0.00340076	0.00890176	0.00455288		0.00686633	0.00560945	0.00523893	0.00784025		0.0193808	0.0288799	0.0333655	0.0273419		0.0342314	0.0287198	0.0219986	0.0184825		0.0207501	0.035249	0.0310337	0.0235819		0.0209942
Otu0000950	Bacteria	Proteobacteria	Deltaproteobacteria	Desulfobacterales	Desulfobacteraceae	unclassified		0.0208352	0.00349939		0.0202041	0.00653034		0.0202664	0.0161117	0.0197541	0.0245901		0.0205912	0.0226218	0.0256068	0.0136655		0.0198389	0.0243947	0.0199033	0.0208996		0.0226443	0.0231639	0.0255332	0.018095		0.0146646	0.0115362	0.0207583	0.0104411		0.0176328	0.0134301	0.014537	0.00946748		0.0289643	0.0185358	0.0178845	0.0107215		0.0195546
Otu0001062	Bacteria	Proteobacteria	Deltaproteobacteria	Desulfobacterales	Desulfobulbaceae	Desulfobulbus		0.00358931	0.00179365		0.00649693	0.00283404		0.00313173	0.00871394	0.00764527	0.0092769		0.00412623	0.00900341	0.00332451	0.0073938		0.00296926	0.00921494	0.00861784	0.00984069		0.00413003	0.00766858	0.00771536	0.00606046		0.00505187	0.0113277	0.0110758	0.00833732		0.00566612	0.0224499	0.011161	0.00979224		0.0090682	0.0167504	0.012731	0.0139636		0.00620153
Otu0001081	Bacteria	Proteobacteria	Deltaproteobacteria	Desulfobacterales	Desulfobacteraceae	unclassified		0.0206425	0.00402123		0.0201165	0.0027864		0.0230455	0.0175247	0.0148032	0.0227626		0.0213452	0.0158775	0.0197108	0.0174676		0.0178223	0.0207459	0.0238419	0.0231646		0.0203571	0.0185688	0.0228274	0.0248163		0.0200404	0.0113145	0.0159595	0.0131719		0.0171952	0.012093	0.0163181	0.0125382		0.0218615	0.0110613	0.0193765	0.0154522		0.0213688
Otu0001085	Bacteria	Proteobacteria	Deltaproteobacteria	Desulfobacterales	Desulfobacteraceae	unclassified		0.0122932	0.0020857		0.013999	0.00494006		0.0110316	0.0130308	0.00831353	0.0114746		0.013999	0.0107807	0.0089927	0.0105686		0.0125128	0.00863302	0.012095	0.0156313		0.0116292	0.0100263	0.0130436	0.0155896		0.0142788	0.0178171	0.0191597	0.0250468		0.0129423	0.0121853	0.0126845	0.0153247		0.0145689	0.0251981	0.0188211	0.0260708		0.0142062
Otu0001139	Bacteria	Proteobacteria	Deltaproteobacteria	Desulfobacterales	Desulfobulbaceae	Desulfobulbus		0.00327911	0.00232651		0.00743022	0.00244087		0.00221128	0.00995128	0.0090569	0.00863763		0.00252865	0.00912362	0.00886541	0.00761121		0.00384093	0.00792748	0.00667137	0.0080819		0.00453557	0.00655992	0.00925857	0.00480346		0.00548752	0.0184238	0.018886	0.0284814		0.0080514	0.0240678	0.0151065	0.0170878		0.00760248	0.0319537	0.0177754	0.018377		0.00857947
Otu0001261	Bacteria	Proteobacteria	Deltaproteobacteria	Syntrophobacterales	Syntrophobacteraceae	Syntrophobacter		0.00304811	0.00143693		0.00937632	0.00288362		0.00359729	0.0031931	0.0043694	0.00326625		0.00234203	0.00316391	0.00324962	0.00707228		0.00294725	0.00385697	0.00330532	0.00266706		0.00330586	0.00268932	0.0031418	0.00174513		0.00587318	0.0129654	0.0194164	0.016859		0.0122061	0.0169688	0.0173496	0.0257371		0.0111466	0.0164764	0.0156823	0.0105428		0.00827937
Otu0001276	Bacteria	Proteobacteria	Deltaproteobacteria	Desulfobacterales	Desulfobacteraceae	unclassified		0.00946304	0.0027516		0.0101907	0.0032659		0.00927313	0.0108012	0.0165697	0.0221696		0.00694817	0.0101195	0.0104859	0.0181356		0.0122828	0.00889734	0.0115611	0.0184577		0.00934801	0.0160698	0.0131596	0.0115854		0.00958768	0.0199978	0.0184798	0.0249432		0.00870629	0.0125744	0.009716	0.0128918		0.0100304	0.0106027	0.0118573	0.010483		0.0124384
Otu0001367	Bacteria	Proteobacteria	Deltaproteobacteria	Desulfobacterales	Desulfobacteraceae	unclassified		0.0168452	0.00482317		0.00719803	0.00296933		0.0119813	0.0120127	0.0104912	0.0145329		0.0186118	0.0153699	0.00991688	0.00908251		0.0159445	0.0125208	0.019341	0.03103		0.020843	0.0155728	0.0182975	0.0217323		0.00562449	0.0051499	0.0113152	0.0131788		0.00640155	0.00794773	0.00478822	0.00431761		0.0090827	0.00859818	0.0107894	0.0079669		0.0076834
Otu0001446	Bacteria	Proteobacteria	Deltaproteobacteria	Syntrophobacterales	Syntrophobacterales_unclassified	unclassified		0.00696773	0.00427557		0.0155964	0.00600686		0.00585969	0.00651443	0.00561648	0.00858422		0.00461935	0.00463318	0.00730046	0.00445542		0.00836329	0.0100741	0.00843562	0.0119962		0.00902858	0.0064954	0.00467	0.00507561		0.0170722	0.0103742	0.0128966	0.0185866		0.0105753	0.00948957	0.00628409	0.00869024		0.0154923	0.00909001	0.0120188	0.0130858		0.0192459
Otu0001449	Bacteria	Proteobacteria	Deltaproteobacteria	Desulfobacterales	Desulfobacteraceae	Desulfobacterium		0.0141774	0.00531433		0.0103252	0.00340226		0.0150048	0.0152024	0.00995853	0.011696		0.0136248	0.0151896	0.00611529	0.00987985		0.0118838	0.0132892	0.00964739	0.0102951		0.0161962	0.0159126	0.00908	0.0135336		0.00721729	0.0108313	0.0104792	0.00888414		0.0129815	0.00901399	0.00827574	0.00621103		0.00877767	0.0119128	0.0126887	0.0142077		0.0123244
Otu0001468	Bacteria	Proteobacteria	Deltaproteobacteria	Desulfobacterales	Desulfobulbaceae	Desulfocapsa		0.00968324	0.00281726		0.00598905	0.00295891		0.00779633	0.0109328	0.0183247	0.0182064		0.0113076	0.0115127	0.0105159	0.0078755		0.0108379	0.0113948	0.00958405	0.00963904		0.00879115	0.00896526	0.0121371	0.0123629		0.00601673	0.013847	0.0118203	0.00868547		0.00612396	0.0118953	0.00852175	0.00988797		0.00569433	0.0103499	0.00576135	0.00687135		0.00612118
Otu0001536	Bacteria	Proteobacteria	Deltaproteobacteria	Desulfovibrionales	Desulfohalobiaceae	unclassified		0.0129942	0.00447207		0.00385304	0.00161435		0.0133835	0.0172227	0.0170734	0.0213396		0.0147293	0.0144888	0.0140758	0.0103		0.00986244	0.0196104	0.0146129	0.025626		0.0140015	0.018551	0.0142062	0.0145226		0.00243903	0.00577427	0.00785919	0.0149894		0.00483043	0.00441856	0.0036107	0.00295757		0.0035829	0.00694547	0.00692304	0.00368734		0.00455981
Otu0001547	Bacteria	Proteobacteria	Deltaproteobacteria	Desulfobacterales	Desulfobulbaceae	Desulfocapsa		0.00328978	0.00165467		0.00406604	0.00281732		0.00269878	0.00659523	0.00940235	0.0179914		0.00282854	0.00617868	0.00574308	0.00375195		0.00317726	0.01207	0.00536754	0.0106952		0.00445454	0.00419898	0.0046485	0.00807344		0.00366451	0.00881563	0.0076696	0.0198624		0.00604287	0.00859657	0.00407918	0.0042016		0.00410273	0.0105506	0.00726033	0.0068938		0.00245406
Otu0001587	Bacteria	Proteobacteria	Deltaproteobacteria	Syntrophobacterales	Syntrophobacteraceae	Syntrophobacter		0.00641268	0.00684482		0.00504618	0.00899176		0.0019168	0.00485181	0.00723275	0.0159576		0.00763744	0.00976323	0.00134029	0.0194723		0.0118196	0.0149117	0.00443396	0.00199276		0.00427686	0.00561108	0.0121319	0.0114472		0.0010451	0.018236	0.0231007	0.0080716		0.0101978	0.0322333	0.00150679	0.0052456		0.00119943	0.0411153	0.00424436	0.0237479		0.00774245
Otu0001609	Bacteria	Proteobacteria	Deltaproteobacteria	Desulfobacterales	Desulfobacteraceae	unclassified		0.00663433	0.00232095		0.0176262	0.00592965		0.00646143	0.00715339	0.0041423	0.00336308		0.00488885	0.00608956	0.0087627	0.00364619		0.00732842	0.00266025	0.00541891	0.00608915		0.00785861	0.00490989	0.00596037	0.00626781		0.0143474	0.00798285	0.0162357	0.0102762		0.0189857	0.009617	0.0135543	0.00604		0.0171777	0.0143485	0.0165888	0.0111267		0.0199941
Otu0001735	Bacteria	Proteobacteria	Deltaproteobacteria	Desulfobacterales	Desulfobacteraceae	unclassified		0.00614981	0.00253029		0.00356725	0.00210859		0.00631248	0.00622129	0.00850857	0.00605978		0.00736134	0.00354814	0.00383475	0.00576385		0.00574747	0.00521644	0.00930143	0.0115423		0.00517796	0.00553035	0.00855475	0.0126913		0.0046043	0.00686421	0.0134556	0.0176578		0.001789	0.0079337	0.00387275	0.00302429		0.00388395	0.00926163	0.00621038	0.00734669		0.00399175
Otu0001750	Bacteria	Proteobacteria	Deltaproteobacteria	Desulfobacterales	Desulfobacteraceae	unclassified		0.00684884	0.00230141		0.0169335	0.00515515		0.00712002	0.00494862	0.00764527	0.00438395		0.00663109	0.00999617	0.00535797	0.00524395		0.00527485	0.00609431	0.00951524	0.00681796		0.00836939	0.00775254	0.00500303	0.00903675		0.0158901	0.00716553	0.0175547	0.0112462		0.0179498	0.00820721	0.0165969	0.00751293		0.0149338	0.017054	0.0145116	0.0102977		0.0189604
Otu0001762	Bacteria	Proteobacteria	Deltaproteobacteria	Syntrophobacterales	Syntrophaceae	Desulfobacca		0.00375838	0.00311343		0.0061602	0.00203913		0.00253132	0.00519103	0.00783717	0.00388207		0.00693759	0.00541021	0.00574625	0.00647012		0.00144572	0.00325799	0.00941354	0.00929342		0.0041189	0.00479124	0.00790109	0.0108208		0.00751598	0.00902319	0.0112008	0.0184102		0.00600343	0.00627267	0.00472134	0.00891069		0.00500023	0.00859876	0.0137683	0.0119678		0.00612118
Otu0001784	Bacteria	Proteobacteria	Deltaproteobacteria	Desulfobacterales	Desulfobacteraceae	unclassified		0.00936028	0.00340684		0.0107092	0.00348573		0.00737273	0.0079487	0.00822881	0.0116796		0.00812298	0.00735383	0.00700631	0.0113353		0.00972442	0.00837578	0.0120272	0.0091193		0.012221	0.00741767	0.00700438	0.00796556		0.0110437	0.00789299	0.0148832	0.0149883		0.0103979	0.00802843	0.00818156	0.00639376		0.01007	0.00927648	0.0114713	0.00521155		0.0113252
Otu0001882	Bacteria	Proteobacteria	Deltaproteobacteria	Desulfobacterales	Desulfobacteraceae	unclassified		0.00764217	0.00275958		0.0142017	0.00472957		0.00635787	0.00353367	0.0046317	0.00542193		0.0111381	0.00377351	0.00674532	0.00339224		0.00597749	0.00651056	0.00479138	0.0059076		0.00709516	0.00595242	0.00414214	0.00628504		0.0116096	0.00548842	0.0126432	0.00697904		0.0157443	0.00815341	0.00657378	0.00581968		0.0160219	0.00963558	0.00774744	0.00803051		0.0134309
Otu0001930	Bacteria	Proteobacteria	Deltaproteobacteria	Syntrophobacterales	Syntrophobacteraceae	unclassified		0.00772561	0.00354361		0.00530455	0.00253843		0.00614483	0.00570175	0.00678042	0.00822973		0.0083162	0.00401069	0.00643726	0.00543198		0.00886375	0.0091908	0.00758621	0.0102959		0.00757764	0.00545936	0.00724027	0.00809497		0.00592333	0.00397861	0.0071025	0.00726537		0.00520883	0.00721947	0.00642876	0.00404786		0.00490911	0.00755964	0.00888478	0.00883707		0.00517691
Otu0001943	Bacteria	Proteobacteria	Deltaproteobacteria	Desulfobacterales	Desulfobacteraceae	unclassified		0.013803	0.0145698		0.0109157	0.0109909		0.0245557	0.00710206	0.0130021	0.0298805		0.00756515	0.00838956	0.0205622	0.00296776		0.00454437	0.00883866	0.00478799	0.0209141		0.0185466	0.00782839	0.00343832	0.0026264		0.0127034	0.00159966	0.00153147	0.00261515		0.00220684	0.00712692	0.00144537	0.000985856		0.0127931	0.0024362	0.00348934	0.000997378		0.0159596
Otu0002044	Bacteria	Proteobacteria	Deltaproteobacteria	Desulfobacterales	Desulfobacteraceae	unclassified		0.013721	0.00345585		0.00720449	0.00444999		0.0135326	0.0110469	0.0107498	0.00372471		0.0127747	0.0082854	0.0106379	0.00754798		0.0156445	0.0119551	0.00993235	0.00410513		0.0129323	0.0118692	0.00751529	0.0119612		0.0074105	0.00575881	0.00667099	0.00538088		0.00886698	0.00384245	0.00617764	0.00388555		0.00673798	0.00772608	0.00633319	0.009319		0.00580249
Otu0002092	Bacteria	Proteobacteria	Deltaproteobacteria	Desulfobacterales	Desulfobulbaceae	Desulfobulbus		0.000233913	0.000593443		0.000848265	0.000703449		0	0.00229437	0.0036933	0.00526029		0	0.000693318	0.000785143	0		0.000286625	0.00100857	0.00313585	0.000937886		0.000649026	0.000626945	0	0.000760274		0.00107018	0.00706022	0.00545494	0.0120107		0.00111328	0.00971173	0.00513387	0.00203843		0.000912887	0.0063999	0.00577036	0.00629677		0.000296713
Otu0002094	Bacteria	Proteobacteria	Deltaproteobacteria	Desulfobacterales	Desulfobulbaceae	Desulfobulbus		0.000909727	0.000984749		0.00471605	0.0032749		0.00160954	0.00389024	0.00410396	0.00406003		0.00146712	0.00295891	0.00124831	0.00474321		0.000562246	0.00551406	0.00558942	0.0051433		0	0.00268284	0.000706431	0.00271275		0.00653936	0.00767219	0.00621498	0.00822905		0.00467211	0.0131648	0.0111668	0.00768709		0.0027184	0.0184517	0.0119717	0.00845542		0.00493433
Otu0002140	Bacteria	Proteobacteria	Deltaproteobacteria	Desulfobacterales	Desulfobacteraceae	unclassified		0.00730454	0.00142155		0.0130181	0.00466899		0.00911482	0.00582999	0.00432949	0.00304201		0.00749842	0.00679576	0.00469478	0.00549355		0.00611271	0.00517648	0.00712944	0.00526159		0.00649222	0.00563928	0.00645696	0.00437584		0.0122069	0.00768459	0.00608749	0.00691035		0.014114	0.00774205	0.00862174	0.00347378		0.00951141	0.0109298	0.0133786	0.00743275		0.01624
Otu0002155	Bacteria	Proteobacteria	Deltaproteobacteria	Syntrophobacterales	Syntrophobacteraceae	Syntrophobacter		0.00295355	0.00228052		0.010188	0.00495918		0.00162937	0.00228031	0.00292571	0.00229308		0.00234203	0.00431337	0.0044038	0.00211166		0.00383072	0.00317391	0.00199679	0.00321301		0.00401209	0.00243355	0.00252205	0.00215551		0.0113057	0.0120513	0.00974289	0.0139232		0.0140548	0.01327	0.0128579	0.0126338		0.00821034	0.0139996	0.0157337	0.012066		0.00718118
Otu0002222	Bacteria	Proteobacteria	Deltaproteobacteria	Desulfobacterales	Desulfobacteraceae	unclassified		0.000883919	0.000939649		0.011715	0.00418681		0	0.000586276	0.00144212	0.00488582		0.000786406	0.000262945	0.000985158	0.000399441		0.000905479	0.000929903	0.000283917	0.00208484		0.00184379	0.000885959	0.00241126	0		0.0114728	0.0166954	0.0232638	0.0392335		0.0131391	0.00984958	0.00531266	0.0048424		0.00987457	0.0146058	0.0117705	0.0135695		0.0123735
Otu0002278	Bacteria	Proteobacteria	Deltaproteobacteria	Desulfobacterales	Desulfobacteraceae	unclassified		0.0100357	0.00346906		0.00508471	0.00232096		0.00921495	0.0085824	0.0077094	0.00778759		0.0139419	0.00847752	0.00991688	0.00975659		0.0085705	0.0115763	0.0115681	0.0150128		0.00841547	0.00726434	0.00875937	0.00971499		0.00833071	0.00849174	0.0082793	0.00766106		0.00441313	0.00722526	0.00578695	0.00598199		0.00300981	0.00762319	0.0065524	0.0071614		0.00458518
Otu0002311	Bacteria	Proteobacteria	Deltaproteobacteria	Syntrophobacterales	Syntrophaceae	Desulfobacca		0.00261812	0.00183156		0.00817865	0.00298666		0.00137323	0.0013201	0.00330794	0.00379237		0.00285332	0.00363186	0.00186444	0.00291054		0.00349849	0.0028817	0.00455778	0.00328631		0.00274743	0.00239562	0.00120563	0.00324414		0.00653278	0.00646371	0.00604989	0.0205535		0.00767354	0.0103477	0.00917483	0.00929346		0.00806817	0.0102149	0.00836164	0.00944621		0.0104401
Otu0002324	Bacteria	Proteobacteria	Deltaproteobacteria	Desulfobacterales	Desulfobacteraceae	unclassified		0.00550493	0.00229331		0.010573	0.00371319		0.00431538	0.00348624	0.00452766	0.00568816		0.00557617	0.00492938	0.00518895	0.00643192		0.00755923	0.00443597	0.0074144	0.00608041		0.00456896	0.00603703	0.00655795	0.00522245		0.00906505	0.00678759	0.0113275	0.0125163		0.0122664	0.00667824	0.00992209	0.00906442		0.00944276	0.00818763	0.0114216	0.00862754		0.0115178
Otu0002336	Bacteria	Proteobacteria	Deltaproteobacteria	Desulfovibrionales	Desulfomicrobiaceae	Desulfomicrobium		0.003228	0.0020306		0.000610681	0.000691008		0.00419198	0.0131345	0.021465	0.0409228		0.0012805	0.00510113	0.00686944	0.0092662		0.00462219	0.0101981	0.00980853	0.0113084		0.00281733	0.00645424	0.0076893	0.00897625		0.000547543	0.00482685	0.00497443	0.00633027		0.000377852	0.00238928	0.00151771	0.00247921		0.000626343	0.00236531	0.00289522	0.00115363		0.000890987
Otu0002402	Bacteria	Proteobacteria	Deltaproteobacteria	Desulfobacterales	Desulfobulbaceae	Desulfocapsa		0.0131298	0.00954469		0.00371505	0.00341192		0.0124995	0.00894169	0.00179698	0.0273223		0.0131509	0.0142001	0.00936059	0.00325275		0.013951	0.013688	0.019049	0.0159421		0.0129181	0.00675831	0.00612459	0.013011		0.00403826	0.000338516	0.0096098	0.00409762		0.0048507	0.00731421	0.00313641	0.00210502		0.00597125	0.00365949	0.000918131	0.0030568		0
Otu0002461	Bacteria	Proteobacteria	Deltaproteobacteria	Desulfobacterales	Desulfobacteraceae	unclassified		0.00700909	0.00289932		0.00669796	0.00252268		0.00794528	0.00529444	0.00686984	0.00676672		0.00616837	0.00598116	0.00555798	0.00622052		0.00651414	0.00597693	0.00620992	0.00720989		0.00740855	0.0104039	0.00632922	0.00916187		0.00608521	0.00851737	0.011835	0.0164501		0.00602315	0.00818031	0.00301904	0.00393498		0.00650558	0.018605	0.011538	0.010148		0.00817789
Otu0002484	Bacteria	Proteobacteria	Deltaproteobacteria	Desulfobacterales	Desulfobacteraceae	unclassified		0.00838775	0.00331577		0.0046894	0.00262295		0.0101566	0.00840344	0.00706488	0.0060135		0.00764307	0.00613462	0.00528308	0.00489739		0.00701899	0.00727771	0.00575654	0.00555062		0.00873238	0.00457178	0.0052826	0.0100864		0.00366451	0.00355024	0.00503817	0.00579773		0.00501013	0.00446773	0.00250006	0.0036941		0.00299044	0.00660467	0.00611398	0.00655884		0.00709252
Otu0002546	Bacteria	Proteobacteria	Deltaproteobacteria	Desulfobacterales	Desulfobacteraceae	unclassified		0.00886419	0.00346342		0.003614	0.00233409		0.00742384	0.00651443	0.0042432	0.00878216		0.00885984	0.00782286	0.00814658	0.00597526		0.0084081	0.00811812	0.00872084	0.0188396		0.010765	0.00645424	0.00639894	0.00456165		0.00364601	0.00337987	0.00660725	0.0139232		0.00115328	0.0039534	0.00354929	0.000823543		0.00410273	0.00685915	0.00686	0.00890726		0.00555397
Otu0002612	Bacteria	Proteobacteria	Deltaproteobacteria	Desulfobacterales	Desulfobacteraceae	unclassified		0.00239514	0.00246016		0.0022455	0.00161219		0.00391161	0.00276842	0.00358769	0.00290319		0.00121677	0.00626987	0.00337158	0.00302065		0.00411655	0.00671203	0.00427516	0.00718979		0.000335643	0.00346797	0.00318742	0.00666096		0.0036211	0.00096289	0.00437783	0.00624206		0.002306	0.00332567	0.00400685	0.00164709		0.00121881	0.00478378	0.00462401	0.00391379		0.00183611
Otu0002613	Bacteria	Proteobacteria	Deltaproteobacteria	Desulfobacterales	Desulfobulbaceae	Desulfocapsa		0.00672535	0.00992909		0.00226465	0.00273763		0.00384047	0.013635	0.025534	0.0168653		0.00992603	0.0109566	0.00198639	0.00980193		0.00696914	0.00845736	0.000912494	0.0107301		0.00616575	0.0146353	0.0137357	0.00586173		0.0010451	0.0101317	0.00320018	0.00861788		0.000337857	0.000300414	0.00197562	0.00238362		0.00130594	0.00270554	0.00885303	0.00424394		0.0063697
Otu0002649	Bacteria	Proteobacteria	Deltaproteobacteria	Desulfobacterales	Desulfobacteraceae	unclassified		0.0106846	0.0025037		0.00188923	0.00180936		0.0107698	0.0050661	0.00683935	0.00750282		0.0123701	0.00629456	0.00765242	0.00694147		0.00991984	0.00835705	0.00947064	0.00832933		0.00967858	0.0100658	0.00830384	0.00813394		0.0026879	0.00127354	0.00154372	0.00118131		0.00262469	0.000600828	0.0018306	0.000765536		0.000359176	0.00209195	0.00444082	0.00106099		0.00188515
Otu0002676	Bacteria	Proteobacteria	Deltaproteobacteria	Desulfobacterales	Desulfobacteraceae	unclassified		0.00379305	0.00200039		0.00657456	0.00258876		0.00334821	0.00334064	0.00471642	0.00723659		0.00312844	0.00797632	0.0066651	0.00627774		0.00321028	0.00402639	0.00547496	0.00711781		0.00548529	0.00520197	0.00532366	0.00595689		0.00553767	0.00362769	0.00440483	0.0043834		0.0091444	0.00392071	0.00498374	0.00375224		0.00422862	0.00820421	0.00689129	0.00551372		0.00738754
Otu0002689	Bacteria	Proteobacteria	Deltaproteobacteria	Desulfobacterales	Desulfobacteraceae	unclassified		0.00436451	0.00223352		0.00611043	0.00298986		0.00516144	0.00247859	0.00623522	0.00703723		0.00489545	0.00435735	0.00619018	0.00536441		0.00495442	0.00506035	0.00490244	0.00918309		0.00244674	0.00439024	0.00573813	0.0044148		0.00487166	0.00422727	0.0083258	0.00620771		0.00552642	0.00443504	0.0048551	0.00309101		0.00848714	0.00578458	0.00706813	0.00571113		0.00555652
Otu0002910	Bacteria	Proteobacteria	Deltaproteobacteria	Desulfobacterales	Desulfobacteraceae	unclassified		0.00556681	0.00293298		0.00416771	0.00185399		0.00700367	0.00262088	0.00394727	0.00407429		0.00518776	0.00263802	0.00464771	0.00184736		0.00597311	0.00361014	0.00575888	0.00527907		0.00410269	0.00406672	0.00629795	0.00688124		0.00373957	0.00252229	0.0053291	0.00597414		0.00300199	0.00449463	0.00487148	0.00375224		0.00566533	0.00183803	0.00304932	0.00525824		0.00426394
Otu0003073	Bacteria	Proteobacteria	Deltaproteobacteria	Desulfovibrionales	Desulfovibrionaceae	Desulfovibrio		0.00257964	0.00200505		0.000530679	0.00120117		0.00136751	0.0102624	0.023906	0.0505827		0.00363311	0.00287519	0.000416105	0.000731307		0.00261502	0.00500166	0.00211359	0.00611536		0.00270291	0.00217453	0.000385802	0.000349886		0.000385664	0.00208069	0.00930406	0.0181697		0.000377852	0.000928144	0	0		0.0013592	0.000544997	0.0011797	0.000643716		0
Otu0003099	Bacteria	Proteobacteria	Deltaproteobacteria	Desulfobacterales	Desulfobacteraceae	unclassified		0.00363466	0.00153086		0.00502652	0.00205138		0.00422459	0.00265425	0.00198888	0.00373184		0.00206691	0.00316391	0.00346571	0.00330998		0.00313245	0.00268564	0.00388018	0.00351286		0.0051147	0.00343491	0.00502714	0.00682074		0.00512693	0.00436978	0.00502343	0.00894542		0.00441313	0.00545792	0.00545768	0.00547449		0.0060544	0.00488782	0.00662811	0.00625008		0.00451161
Otu0003110	Bacteria	Proteobacteria	Deltaproteobacteria	Syntrophobacterales	Syntrophobacteraceae	unclassified		0.00285798	0.00190181		0.00510548	0.00259284		0.00400106	0.001873	0.00315281	0.0042437		0.0013862	0.00280437	0.00383475	0.00370942		0.00313166	0.00363553	0.00296769	0.0028224		0.00291301	0.00310328	0.00261133	0.00195247		0.00498996	0.00550082	0.00498668	0.0131043		0.00562668	0.00709784	0.0038731	0.0047381		0.00440777	0.00479978	0.00447891	0.010744		0.00539751
Otu0003112	Bacteria	Proteobacteria	Deltaproteobacteria	Desulfobacterales	Desulfobulbaceae	Desulfocapsa		0.00441628	0.00203504		0.00279254	0.00188707		0.00471571	0.0061598	0.00667481	0.0134957		0.00380915	0.00524386	0.00446478	0.00418078		0.00501023	0.00690684	0.00725327	0.00727314		0.00413003	0.00439348	0.0041467	0.0055465		0.0034658	0.00460298	0.00277202	0.00722415		0.00328013	0.00443504	0.00611622	0.00250821		0.00202429	0.00668811	0.00295559	0.004245		0.00239992
Otu0003113	Bacteria	Proteobacteria	Deltaproteobacteria	Syntrophobacterales	Syntrophobacteraceae	unclassified		0.00227423	0.00182792		0.00490708	0.00236934		0.00214606	0.00324053	0.00331265	0.003126		0.00157281	0.00372845	0.00315765	0.00158741		0.00318747	0.00197719	0.000910151	0.00398683		0.00219056	0.00239076	0.00227375	0.00332618		0.00418698	0.00704782	0.009492	0.0145714		0.00667914	0.00579102	0.00354929	0.00495842		0.00506888	0.0053465	0.00678221	0.00538651		0.00369335
Otu0003115	Bacteria	Proteobacteria	Deltaproteobacteria	Syntrophobacterales	Syntrophobacterales_unclassified	unclassified		0.009505	0.00345793		0.00159569	0.00192557		0.00824549	0.0059982	0.00471956	0.00489581		0.0107392	0.00678288	0.00591311	0.00660961		0.00690498	0.00949633	0.00798354	0.0071911		0.0121304	0.0122815	0.00790564	0.00638881		0.000684512	0.00191032	0.00230376	0.00439769		0.00214713	0.00140155	0.00301358	0.00139763		0.0020388	0.00236531	0.0017939	0.00262635		0.00151233
Otu0003127	Bacteria	Proteobacteria	Deltaproteobacteria	Syntrophobacterales	Syntrophobacteraceae	Syntrophobacter		0.00370612	0.0039766		0.00306433	0.00194697		0.00110564	0.00340738	0.00417123	0.00667275		0.003753	0.00299756	0.0053109	0.00405598		0.00403555	0.00480019	0.00433929	0.00273904		0.00593027	0.00523017	0.00318742	0.00517507		0.00296167	0.0055915	0.00374699	0.00243818		0.00353855	0.00251671	0.00189201	0		0.00308245	0.00692947	0.00153233	0.0068489		0.00267465
Otu0003175	Bacteria	Proteobacteria	Deltaproteobacteria	Desulfobacterales	Desulfobacteraceae	unclassified		0.00498732	0.00403211		0.00684911	0.00515502		0.0061599	0.00242591	0.00315281	0.00523541		0.00686725	0.00639116	0.00306352	0.00422331		0.00284424	0.00591158	0.00142662	0.00626195		0.0040779	0.00151453	0.00591214	0.00326568		0.00741567	0.00479592	0.00397582	0.00256074		0.00399639	0.00350444	0.00582107	0.00417259		0.00759672	0.00127531	0.00579204	0.00162898		0.00838764
Otu0003225	Bacteria	Proteobacteria	Deltaproteobacteria	Syntrophobacterales	Syntrophaceae	Desulfobacca		0.00143273	0.00203399		0.00745361	0.00657098		0.000901945	0.00153243	0.000353298	0.00135192		0.00303332	0.00170752	0.00172323	0.00106317		0.0011355	0.000266816	0.000286261	0.00116443		0.000660156	0.00147011	0.00170938	0.00146005		0.00410657	0.00457373	0.00224001	0.000560017		0.012027	0.00377796	0.00933043	0.00324461		0.0130604	0.0089122	0.00233872	0.00375753		0.000620492
Otu0003228	Bacteria	Proteobacteria	Deltaproteobacteria	Desulfobacterales	Desulfobacteraceae	unclassified		0.000544987	0.000489025		0.00565632	0.00194669		0	0.000293138	0.000545194	0.000796635		0.000380817	0.000333774	0	0		0.000871673	0.00110598	0.000572521	0.00161961		0.00092746	0	0.00068232	0		0.00676315	0.00786513	0.0088358	0.00788721		0.00576512	0.00317958	0.000786832	0.000574084		0.00456842	0.0100594	0.0148309	0.0144386		0.0055286
Otu0003237	Bacteria	Proteobacteria	Deltaproteobacteria	Desulfobacterales	Desulfobacteraceae	unclassified		0.00474467	0.00130043		0.00198073	0.00145698		0.00481928	0.00174147	0.004208	0.00363073		0.00562571	0.0038948	0.00576016	0.00568593		0.00435757	0.00539127	0.00336137	0.00576309		0.00417611	0.00118128	0.00350804	0.00468265		0.00189149	0.00318693	0.00275977	0.00236262		0.00196814	0.00251671	0.00229908	0.00340706		0.00257801	0.00343758	0.00212218	0.0026039		0.00148526
Otu0003243	Bacteria	Proteobacteria	Deltaproteobacteria	Syntrophobacterales	Syntrophobacteraceae	Syntrophobacter		0.00101045	0.00110713		0.00327365	0.00140803		0.00185863	0.001873	0.00163558	0.00205458		0.0010863	0.000525891	0.00155637	0.000798882		0.000562246	0.000513653	0.00211593	0.00123773		0.000534608	0.00151128	0.000978838	0.000984853		0.00373299	0.00349758	0.00578346	0.00630279		0.00409555	0.0047437	0.00499466	0.0072636		0.00345701	0.00396542	0.00439846	0.00263294		0.00180904
Otu0003303	Bacteria	Proteobacteria	Deltaproteobacteria	Desulfobacterales	Desulfobacteraceae	unclassified		0.0053198	0.00266624		0.0044333	0.00109613		0.00519406	0.00463812	0.00668266	0.00481324		0.00399577	0.00650705	0.00389573	0.00198686		0.00497801	0.00432526	0.00302609	0.00596211		0.00711137	0.00465087	0.00186839	0.0012527		0.00323544	0.00398167	0.00454542	0.00270391		0.00445313	0.00410773	0.0040628	0.00168467		0.00451517	0.00667441	0.00561152	0.00409908		0.00552945
Otu0003308	Bacteria	Proteobacteria	Deltaproteobacteria	Desulfobacterales	Desulfobacteraceae	unclassified		0.00327336	0.00166556		0.00451212	0.00294771		0.00253705	0.00221882	0.00385313	0.00331966		0.00345311	0.000333774	0.00190934	0.00179448		0.0046788	0.00278305	0.00330532	0.00473312		0.00242448	0.00213985	0.00332232	0.00215551		0.00464129	0.00490124	0.00562003	0.00750471		0.00461256	0.00593956	0.00408464	0.00528318		0.00641756	0.00723368	0.00432275	0.00636144		0.00237709
Otu0003321	Bacteria	Proteobacteria	Deltaproteobacteria	Syntrophobacterales	Syntrophobacteraceae	Syntrophobacter		0.00121536	0.00147602		0.00288162	0.00226157		0.00194941	0.000747879	0.00308084	0.00116112		0.000761635	0.00130292	0.00140126	0.000663733		0.000585048	0.000624376	0.000970892	0.000864587		0.00156536	0	0.000409913	0.000410388		0.00409358	0.00219617	0.00603764	0.00788666		0.00294283	0.00403165	0.00518437	0.0120016		0.00322373	0.00454702	0.00454829	0.0022212		0.00126636
Otu0003333	Bacteria	Proteobacteria	Deltaproteobacteria	Syntrophobacterales	Syntrophaceae	Desulfobacca		0.00604905	0.00669626		0.00158573	0.00120866		0.00274647	0.00163255	0.0033653	0.00391978		0.00987183	0.0136108	0.00566819	0.00357427		0.0106505	0.003166	0.00434996	0.0138424		0.00092746	0.00162669	0.00302125	0.0102936		0.0017981	0.00434053	0.00736222	0.00183695		0.00109356	0.000722465	0.000725416	0.000765536		0.00223821	0.00132733	0.00429099	0.00441158		0.00121307
Otu0003349	Bacteria	Proteobacteria	Deltaproteobacteria	Syntrophobacterales	Syntrophobacterales_unclassified	unclassified		0.00308878	0.00228926		0.00629617	0.00181459		0.00194236	0.000293138	0.00112559	0.00261699		0.00219737	0.0015401	0.00425302	0.00198686		0.00297005	0.00150225	0.00291163	0.000946623		0.00524532	0.00188084	0.00357322	0.00433257		0.00594167	0.00317453	0.00522861	0.0048346		0.00665997	0.00168575	0.00359978	0.00414359		0.00532065	0.00509086	0.00638456	0.00310723		0.00726238
Otu0003366	Bacteria	Proteobacteria	Deltaproteobacteria	Desulfobacterales	Desulfobacteraceae	unclassified		0.00468481	0.00218768		0.00174197	0.00145112		0.00638686	0.00363378	0.00667638	0.00672758		0.00372064	0.00790657	0.00580723	0.00376664		0.00580329	0.00294705	0.00604983	0.00750842		0.00282846	0.00549404	0.00470651	0.00408645		0.000659436	0.00297629	0.00547864	0.00292209		0.00119272	0.0017102	0.00310229	0.00133962		0.00236409	0.00418676	0.00178489	0.00305021		0.00275162
Otu0003408	Bacteria	Proteobacteria	Deltaproteobacteria	Desulfobacterales	Desulfobacteraceae	unclassified		0.00339827	0.00205352		0.00580289	0.0034036		0.00235318	0.00438166	0.00308398	0.00336735		0.00366449	0.0025543	0.00280253	0.000798882		0.00605611	0.00317515	0.00359392	0.00541484		0.00151928	0.00205751	0.00419492	0.00205194		0.00072792	0.00651636	0.00612588	0.00532647		0.00811111	0.00345309	0.00289075	0.00328233		0.00730708	0.00816991	0.00507777	0.00215101		0.00706545
Otu0003512	Bacteria	Proteobacteria	Deltaproteobacteria	Syntrophobacterales	Syntrophobacteraceae	Syntrophobacter		0.00281084	0.00226275		0.00401611	0.00300427		0.000549294	0.00136753	0.00295935	0.00407287		0.00429664	0.00266271	0.00369672	0.0031176		0.00321107	0.000624376	0.0037003	0.00332258		0.00318636	0.0021794	0.0046824	0.00215982		0.00445417	0.00348518	0.00192374	0.00432955		0.00453201	0.00125546	0.00454221	0.00295757		0.00430125	0.000510125	0.00292857	0.000643716		0.00277699
Otu0003516	Bacteria	Proteobacteria	Deltaproteobacteria	Desulfobacterales	Desulfobacteraceae	unclassified		0.000325384	0.00048809		0.00465546	0.00114226		0	0.00161323	0.000740229	0.00158614		0.000705484	0.000693318	0.00083221	0		0.000596052	0	0.000570178	0.000847113		0	0	0.000706431	0		0.00562449	0.00986837	0.0124055	0.0213111		0.00518856	0.00910267	0.00579241	0.0034362		0.00381619	0.00767808	0.0104658	0.0111921		0.0039926
Otu0003528	Bacteria	Proteobacteria	Deltaproteobacteria	Desulfobacterales	Desulfobacteraceae	unclassified		0.000413734	0.000523101		0.0149242	0.0062789		0.000581906	0.000326509	0	0.000555283		0.000786406	0	0.000369038	0		0.000286625	0.000305527	0	0		0	0.00029532	0	0		0.017421	0.0125734	0.00688172	0.00611209		0.0100796	0.00236238	0.00118298	0.000382768		0.0192503	0.0110796	0.00584607	0.00518535		0.0129457
Otu0003529	Bacteria	Proteobacteria	Deltaproteobacteria	Desulfobacterales	Desulfobacteraceae	unclassified		0.00359767	0.0020518		0.00461574	0.0036537		0.00230779	0.00153243	0.00151252	0.00443022		0.00418997	0.00475447	0.00264958	0.00397805		0.0047126	0.00436397	0.00244888	0.00786541		0.00318031	0.00531575	0.00530671	0.0036371		0.00347756	0.00230149	0.00451842	0.0109049		0.00427398	0.00293876	0.00144537	0.00213416		0.00474757	0.0049165	0.00348033	0.00496265		0.00596387
Otu0003576	Bacteria	Proteobacteria	Deltaproteobacteria	Desulfobacterales	Desulfobulbaceae	Desulfocapsa		0.00541428	0.00258969		0.00528804	0.00326922		0.00587018	0.00310899	0.0051112	0.00594806		0.00393962	0.00351057	0.00321863	0.00470067		0.00584969	0.00594488	0.0065066	0.00531533		0.00599764	0.00394645	0.00632661	0.00451838		0.00257584	0.00618718	0.00670773	0.00454086		0.00600398	0.00678945	0.00407372	0.00276625		0.00684937	0.00514231	0.0055268	0.0045575		0.00572298
Otu0003588	Bacteria	Proteobacteria	Deltaproteobacteria	Syntrophobacterales	Syntrophaceae	Desulfobacca		0.00320913	0.0042041		0.0013962	0.00140481		0.00439435	0.00354967	0.00355563	0.00971904		0.00433762	0.00180304	0.000369038	0.00763025		0.00311986	0.00387445	0.00314652	0.00422551		0.000984669	0.00195993	0.00323108	0.00657462		0.00123206	0.0114994	0.0189232	0.00301826		0.00115328	0.00155587	0.0013785	0.000765536		0.00198554	0.00109057	0.00708301	0.00118267		0.00121392
Otu0003621	Bacteria	Proteobacteria	Deltaproteobacteria	Syntrophobacterales	Syntrophobacteraceae	Syntrophobacter		7.49738e-05	0.000259717		0.0059612	0.00115865		0	0.000373939	0.00285531	0.00241906		0.000299895	0.000262945	0	0		0	0.000572343	0.000914837	0.00245799		0	0.000293699	0.000409913	0		0.00562449	0.00912851	0.00924032	0.0114655		0.0062224	0.0125722	0.00348206	0.00662266		0.00619966	0.0123977	0.00918765	0.0108142		0.00579825
Otu0003739	Bacteria	Proteobacteria	Deltaproteobacteria	Syntrophobacterales	Syntrophaceae	Desulfobacca		0.00184402	0.0013045		0.00600131	0.00162037		0.00252427	0.00166066	0.000580397	0.00191433		0.0010863	0.00277219	0.00144833	0.00165499		0.00150153	0.00182109	0.00358455	0.00453278		0.00226398	0.00176381	0.000819827	0.00209501		0.00710524	0.00201563	0.00640371	0.0101806		0.00481071	0.00476236	0.00439753	0.00331133		0.00634094	0.00212682	0.00551085	0.00231385		0.00574836
Otu0003784	Bacteria	Proteobacteria	Deltaproteobacteria	Desulfobacterales	Desulfobacteraceae	unclassified		0.00272263	0.00118132		0.00338618	0.00184575		0.00319696	0.00133416	0.0032743	0.003126		0.00174224	0.00290096	0.00228054	0.00355958		0.00290164	0.00125541	0.0047997	0.00495966		0.00304968	0.00616702	0.00355366	0.005607		0.00332883	0.00466804	0.00597305	0.00644596		0.00357799	0.00168575	0.00262289	0.00146435		0.00388882	0.00158354	0.00432908	0.00634826		0.00274907
Otu0003789	Bacteria	Proteobacteria	Deltaproteobacteria	Desulfobacterales	Desulfobacteraceae	unclassified		0.00046856	0.000616549		0.00730367	0.00332893		0.000320039	0	0.000546764	0		0.000380817	0	0	0		0.000848871	0	0	0.000291108		0.000324513	0	0.000296518	0.000410388		0.00824406	0.00564333	0.00717685	0.0157818		0.0067794	0.00470277	0.00478822	0.00136862		0.0073692	0.00425708	0.00925909	0.00561849		0.00682202
Otu0003889	Bacteria	Proteobacteria	Deltaproteobacteria	Syntrophobacterales	Syntrophobacteraceae	unclassified		0.00295825	0.00162468		0.00238652	0.00162667		0.00307356	0.00174147	0.00308084	0.00182036		0.00398916	0.00275931	0.00248056	0.00125555		0.00178895	0.00244547	0.00227837	0.00285734		0.00298134	0.00125713	0.00223269	0.00224186		0.00230223	0.00417461	0.00220242	0.00466341		0.00290228	0.00389381	0.00526216	0.00175139		0.00159249	0.00641647	0.0045573	0.00642504		0.00274907
Otu0003895	Bacteria	Proteobacteria	Deltaproteobacteria	Desulfobacterales	Desulfobacteraceae	unclassified		0.00115286	0.00123124		0.00865205	0.00309805		0.0013349	0.000946157	0.00144526	0.00289178		0.000786406	0.00192433	0.000416105	0.000399441		0.0011921	0.000877871	0.000342316	0.00263953		0.00129805	0.000960192	0.00115741	0		0.0082873	0.0131575	0.0167448	0.0195904		0.00733514	0.00544968	0.00157366	0.000287042		0.0110023	0.0109618	0.00786819	0.00363585		0.00798351
Otu0003913	Bacteria	Proteobacteria	Deltaproteobacteria	Desulfovibrionales	Desulfovibrionaceae	Desulfovibrio		0.00161714	0.00140654		0.00120579	0.00108992		0.00117659	0.00306156	0.00767372	0.00554934		0.00279716	0.00402357	0.00472577	0.0023716		0.0011583	0.00333	0.00421781	0.00324928		0.00133652	0.00280634	0.00318742	0.0012527		0.00143076	0.00264001	0.00378538	0.00323644		0.00151086	0.00480547	0.00250006	0.00194284		0.00155861	0.00185633	0.00222492	0.00336271		0.000322932
Otu0003929	Bacteria	Proteobacteria	Deltaproteobacteria	Syntrophobacterales	Syntrophaceae	Desulfomonile		0.0037227	0.00218658		0.00320003	0.00143827		0.00325742	0.00398841	0.00391207	0.00326625		0.00244773	0.00227099	0.0031245	0.00384457		0.00407095	0.00300449	0.0033684	0.00218435		0.0051147	0.0021003	0.00318742	0.00392218		0.00218376	0.00124875	0.00278427	0.00423337		0.00300199	0.00341216	0.0011161	0.00219217		0.00302919	0.00377896	0.00331723	0.00568868		0.00458518
Otu0003937	Bacteria	Proteobacteria	Deltaproteobacteria	Syntrophobacterales	Syntrophaceae	Desulfobacca		0.00181357	0.00225757		0.00795824	0.00416743		0.00283725	0.000979528	0.00112716	0		0.00200317	0.00152721	0.00115418	0.000399441		0.00174255	0.00274975	0.0012011	0.000282371		0.000671285	0.000628566	0.000889553	0.000699773		0.00355903	0.00175457	0.00274587	0.000341285		0.00868712	0.00334433	0.00484964	0.00235448		0.010195	0.00858046	0.00303397	0.00223154		0.00939181
Otu0003964	Bacteria	Proteobacteria	Deltaproteobacteria	Desulfobacterales	Desulfobacteraceae	unclassified		0.00184432	0.00113825		0.00373601	0.0018586		0.00192958	0.00286659	0.00257242	0.00372756		0.00166132	0.00155298	0.00207836	0.00257867		0.00264882	0.00383033	0.00421781	0.00254002		0.00113755	0.0021794	0.00207107	0.00228082		0.00207187	0.00193818	0.00491234	0.00317517		0.00415471	0.00515505	0.00327597	0.000956852		0.00383557	0.00580346	0.00283912	0.0037285		0.00488189
Otu0004048	Bacteria	Proteobacteria	Deltaproteobacteria	Desulfobacterales	Desulfobacteraceae	unclassified		0.00471163	0.00188937		0.00362706	0.00198283		0.00449924	0.00310899	0.00135426	0.00350047		0.00573899	0.00290096	0.00260251	0.00416609		0.00289064	0.00365551	0.00273514	0.00362242		0.00571764	0.00196155	0.00452795	0.00228082		0.0034843	0.00250989	0.00411305	0.00388522		0.00300199	0.00195102	0.00151225	0.00222117		0.00259738	0.0034736	0.00356979	0.00299213		0.00542458
Otu0004054	Bacteria	Proteobacteria	Deltaproteobacteria	Desulfobacterales	Desulfobacteraceae	unclassified		0.00250281	0.00165589		0.00349601	0.00194007		0.00209132	0.00272099	0.00128699	0.00241906		0.00214783	0.00245771	0.00192541	0.000731307		0.00322207	0.00317515	0.0011427	0.00297564		0.00255003	0.00213823	0.00148259	0.00307987		0.00528223	0.00321172	0.00288561	0.0047659		0.00180872	0.00548237	0.00579241	0.00283297		0.00414149	0.003421	0.00221591	0.00327666		0.00275162
Otu0004080	Bacteria	Proteobacteria	Deltaproteobacteria	Syntrophobacterales	Syntrophobacteraceae	unclassified		0.00387001	0.00603778		0.00132046	0.00201122		0.00166771	0.00281916	0.00125179	0.000511862		0.00768399	0.0111875	0.00114027	0.000399441		0.00458679	0.00112471	0.00142896	0.00122899		0.00154154	0.00698036	0.0100309	0.006259		0.000659436	0.000624374	0.000557353	0.00137256		0.00306115	0.000600828	0.00032927	0		0.000966143	0.000544422	0.0041056	0.000643716		0.000595121
Otu0004088	Bacteria	Proteobacteria	Deltaproteobacteria	Desulfobacterales	Desulfobacteraceae	unclassified		0.00232537	0.00157711		0.00319441	0.00168942		0.00204592	0.00153243	0.00231012	0.00271525		0.00174224	0.00195758	0.00562113	0.00303534		0.00145672	0.00357143	0.00244888	0.00312224		0.00405661	0.00331951	0.00321153	0.00259174		0.00284977	0.00392901	0.00630407	0.00211696		0.00194842	0.00189143	0.00334285	0.00209644		0.00433513	0.00452814	0.00502167	0.00445274		0.0036443
Otu0004097	Bacteria	Proteobacteria	Deltaproteobacteria	Desulfobacterales	Desulfobacteraceae	unclassified		0.000210138	0.000528351		0.00428825	0.00256339		0	0.000993587	0.000351729	0.00163669		0	0.00102709	0.00030806	0		0.00057325	0.000208125	0.000286261	0.0010374		0.000267304	0	0.000771605	0		0.00487166	0.010557	0.0103158	0.0256876		0.00572512	0.00741718	0.00328143	0.000985856		0.00318497	0.00799887	0.0106109	0.00839735		0.00337126
Otu0004135	Bacteria	Proteobacteria	Deltaproteobacteria	Desulfobacterales	Desulfobacteraceae	unclassified		0.00173123	0.00103916		0.00268262	0.00170935		0.00111842	0.00237517	0.00292258	0.00764734		0.00252865	0.00207887	0	0.00191928		0.00142292	0.00327131	0.00382048	0.00370446		0.00185492	0.0033905	0.0031633	0		0.00246411	0.00306837	0.00722834	0.0215029		0.00304143	0.000987737	0.0040628	0.00108158		0.00187903	0.00394885	0.00272104	0.00318401		0.00334589
Otu0004172	Bacteria	Proteobacteria	Deltaproteobacteria	Syntrophobacterales	Syntrophobacteraceae	unclassified		0.0014379	0.00136384		0.00477162	0.00231016		0.0011312	0.000293138	0.00272754	0.00247675		0.000380817	0.00212393	0.0010932	0.000856107		0.00141112	0.00239344	0.00199679	0.000573479		0.00282846	0.00121596	0.00129947	0.00285529		0.00419356	0.00373301	0.00520161	0.00845987		0.00582483	0.00501142	0.0017801	0.00205886		0.00537391	0.00398257	0.0051805	0.00426745		0.00369419
Otu0004186	Bacteria	Proteobacteria	Deltaproteobacteria	Syntrophobacterales	Syntrophobacteraceae	Syntrophobacter		0.00247947	0.00139297		0.00371316	0.0020919		0.0021041	0.00264019	0.00343257	0.00350047		0.00323413	0.00231713	0.00083221	0.000731307		0.00206457	0.00212662	0.0028462	0.00330379		0.00251507	0.00184291	0.00191206	0.00217705		0.00455431	0.00342013	0.00325252	0.00968295		0.00268385	0.00665134	0.00487148	0.00120631		0.00327698	0.00376411	0.00482521	0.00426192		0.00433751
Otu0004224	Bacteria	Proteobacteria	Deltaproteobacteria	Desulfobacterales	Desulfobacteraceae	unclassified		0.00175505	0.00105469		0.00367817	0.00192187		0.00138029	0.00257345	0.00398404	0.00383294		0.00285332	0.00120632	0.00291057	0.00257867		0.000596052	0.0026282	0.00268377	0.00501549		0.00219056	0.00029532	0.00266411	0.00351179		0.00378298	0.00235415	0.00642991	0.0035508		0.00554614	0.00176979	0.00282933	0.00136862		0.00206305	0.0055141	0.00313404	0.00218005		0.00332052
Otu0004247	Bacteria	Proteobacteria	Deltaproteobacteria	Syntrophobacterales	Syntrophaceae	Desulfomonile		0.00315285	0.00156608		0.00354282	0.0016897		0.00308061	0.00265425	0.00221598	0.00406288		0.00312844	0.00403646	0.00297155	0.00429089		0.00229459	0.00366217	0.00335903	0.00340461		0.00410777	0.00158876	0.00507536	0.00224186		0.0038698	0.00503441	0.00366929	0.00417209		0.00336012	0.00434855	0.00300812	0.00324475		0.00394208	0.00345645	0.00600491	0.00282376		0.00299928
Otu0004268	Bacteria	Proteobacteria	Deltaproteobacteria	Desulfobacterales	Desulfobacteraceae	unclassified		0.000831082	0.000801626		0.00498248	0.0076606		0.000274647	0.00738393	0.00674473	0.0102293		0.00100538	0	0.00958107	0		0.000860669	0.00129412	0.0326064	0.0017117		0.00118363	0	0.00068232	0.00246233		0.003696	0.000350914	0	0.000716919		0.00198787	0.00830991	0.0103305	0.00646362		0.00472332	0.0129583	0.000285919	0.0116242		0.00952273
Otu0004290	Bacteria	Proteobacteria	Deltaproteobacteria	Desulfobacterales	Desulfobacteraceae	unclassified		0.0011374	0.000978795		0.00520113	0.00264351		0.000581906	0	0.0036276	0.00126222		0.0010863	0.00087255	0.000369038	0.000399441		0.00169774	0.00104729	0	0.00218435		0.00118363	0.000333247	0.00115741	0.000349886		0.00403184	0.014755	0.0102765	0.0163265		0.00475099	0.00743918	0.00322002	0.000287042		0.00646771	0.00853016	0.00393409	0.00745699		0.00555397
Otu0004364	Bacteria	Proteobacteria	Deltaproteobacteria	Syntrophobacterales	Syntrophobacteraceae	Syntrophobacter		0.000922621	0.000789137		0.0033388	0.00129301		0.00143846	0.00149576	0.000900062	0.00125794		0.000980607	0.00223342	0.00120125	0.00172256		0.000275621	0.00102731	0.00188104	0.00198402		0.000995798	0.000920644	0.00179866	0.00180993		0.00278129	0.00228909	0.00210107	0.00374205		0.00306171	0.00317134	0.00393416	0.00391456		0.00322373	0.00318309	0.00298894	0.00294545		0.00428847
Otu0004554	Bacteria	Proteobacteria	Deltaproteobacteria	Desulfobacterales	Desulfobacteraceae	unclassified		0.0019729	0.00164479		0.00347127	0.00216765		0.00206576	0.00182557	0.000932125	0.000277641		0.00258578	0.0011355	0.0010932	0		0.00169854	0.00139152	0.000914837	0.00238469		0.00154154	0	0.00127536	0.00139524		0.00289318	0.00274532	0.00402481	0.00579031		0.00286228	0.00182939	0.00314187	0.00385641		0.00575335	0.00318079	0.00414163	0.0058795		0.00237625
Otu0004575	Bacteria	Proteobacteria	Deltaproteobacteria	Desulfobacterales	Desulfobacteraceae	unclassified		0.000606427	0.000692298		0.00599747	0.00263587		0.000811161	0.000373939	0.00125022	0.000234221		0.000980607	0	0.000369038	0		0.000309427	0.000208125	0.000626233	0.000373144		0.000324513	0.00029532	0.000385802	0.000410388		0.00515201	0.00397861	0.00488619	0.00753795		0.00616214	0.00272484	0.00184152	0.00232548		0.0056847	0.00760604	0.00574334	0.00549127		0.00699104
Otu0004600	Bacteria	Proteobacteria	Deltaproteobacteria	Desulfobacterales	Desulfobulbaceae	Desulfobulbus		0.00265819	0.000893078		0.00128466	0.00100161		0.00285709	0.00571912	0.00764371	0.00868533		0.00176701	0.00467824	0.00361549	0.00297811		0.00289064	0.00319389	0.00570153	0.00338582		0.00311802	0.00353087	0.00318742	0.00139524		0.000889799	0.00236655	0.00307519	0.00329827		0.00105357	0.00273308	0.00117206	0.000574084		0.00103878	0.00294517	0.00273638	0.00157749		0.00215649
Otu0004664	Bacteria	Proteobacteria	Deltaproteobacteria	Desulfobacterales	Desulfobacteraceae	unclassified		0.00244058	0.0015963		0.00293829	0.00161806		0.00198775	0.000373939	0.00285688	0.00196488		0.00249727	0.00283013	0.00115418	0.00113075		0.00267163	0.00152223	0.00216965	0.00334879		0.00260567	0.00184615	0.00318286	0.0024449		0.00300507	0.00136646	0.00556853	0.0108854		0.00443286	0.00152897	0.00263927	0.00222975		0.00129144	0.00660409	0.00556916	0.00524237		0.00302381
Otu0004696	Bacteria	Proteobacteria	Deltaproteobacteria	Desulfobacterales	Desulfobacteraceae	Desulfobacterium		0.0016077	0.00211922		0.00228243	0.00230193		0.00160019	0.00127267	0.00211037	0.00176981		0.00258578	0.00162381	0	0.000663733		0.000286625	0.000572343	0.00125247	0.00465108		0.00195821	0.000333247	0.00195768	0.0012527		0.00177302	0.00412112	0.00558413	0.00221259		0.00427398	0.00433207	0.00459305	0.00250821		0.0010049	0.00674185	0.0034824	0.00456962		0.00207784
Otu0004717	Bacteria	Proteobacteria	Deltaproteobacteria	Desulfobacterales	Desulfobulbaceae	Desulfocapsa		0.00189416	0.00150138		0.00137912	0.00103424		0.000914725	0.00421675	0.00311761	0.00457902		0.00214783	0.00237507	0.00270839	0.00144792		0.00264803	0.00511779	0.00674149	0.00332258		0.00186605	0.00394321	0.00434482	0.00266948		0.00216526	0.00577427	0.00240425	0.00348897		0.00107329	0.0038669	0.00189747	0.00105258		0.0016845	0.0043251	0.00372389	0.00227269		0.000593426
Otu0004768	Bacteria	Proteobacteria	Deltaproteobacteria	Syntrophobacterales	Syntrophobacteraceae	Syntrophobacter		0.00036766	0.000712608		0.00424469	0.00314786		0.000523734	0.000912786	0	0		0	0.000693318	0	0		0.000275621	0.000305527	0	0		0.000671285	0.00129506	0.00150215	0.000349886		0.00380148	0.00448833	0.00429374	0.00791469		0.00391657	0.00632402	0.00262835	0.00164709		0.00712705	0.00714909	0.00634853	0.00530598		0.00213367
Otu0004769	Bacteria	Proteobacteria	Deltaproteobacteria	Desulfobacterales	Desulfobacteraceae	unclassified		0.000537345	0.000636145		0.00987736	0.00418621		0.00117659	0.000912786	0.000351729	0.000468441		0.000705484	0.000667548	0	0		0	0	0.000286261	0.000282371		0.000267304	0.000589018	0	0		0.00639581	0.00382063	0.0071	0.00831726		0.00958197	0.00383421	0.00334831	0.0012729		0.00993834	0.00369264	0.0053727	0.00454164		0.0135933
Otu0004807	Bacteria	Proteobacteria	Deltaproteobacteria	Syntrophobacterales	Syntrophobacteraceae	unclassified		0.00172018	0.000773477		0.00403257	0.00169114		0.00165493	0.000700449	0.00163872	0.00256359		0.00166132	0.00327231	0.00260251	0.00113075		0.00170954	0.00357684	0.00507893	0.005115		0.00185492	0.00121596	0	0.00139524		0.00487149	0.00771162	0.00379763	0.00672652		0.00325986	0.00371258	0.00340972	0.00235448		0.00338837	0.00341928	0.0015927	0.00398398		0.00461055
Otu0004875	Bacteria	Proteobacteria	Deltaproteobacteria	Syntrophobacterales	Syntrophobacteraceae	unclassified		0.00469828	0.00234565		0.00111537	0.00106796		0.00408269	0	0.00400983	0.00425368		0.00693098	0.00334422	0.00364865	0.00217923		0.00326768	0.00381826	0.00148267	0.00570595		0.00451175	0.00361321	0.00482902	0.00388341		0.00161772	0	0.000974118	0.0010582		0.00153113	0.000386909	0.000725416	0.000823543		0.000718352	0.000817783	0.000960492	0.00144369		0.000594274
Otu0004935	Bacteria	Proteobacteria	Deltaproteobacteria	Desulfobacterales	Desulfobacteraceae	unclassified		0.00315348	0.00211902		0.00536854	0.00212549		0.002686	0.00189231	0.00125179	0.003126		0.00288469	0.000346659	0.00435674	0.00277539		0.00293545	0.00363553	0.00496318	0.00217562		0.00410777	0.00423853	0.00448688	0.00111016		0.00457939	0.00234175	0.00510027	0.00342825		0.00411472	0.00425381	0.00222128	0.00435533		0.00608827	0.00270784	0.00396745	0.00196019		0.00669178
Otu0005039	Bacteria	Proteobacteria	Deltaproteobacteria	Desulfobacterales	Desulfobulbaceae	Desulfocapsa		0.00156925	0.00180041		0.000493856	0.000523315		0.000960117	0.00299482	0.00561491	0.00681014		0.00192886	0.00249636	0.00166226	0.00172256		0.000826863	0.00222402	0.0018203	0.00284992		0.00256115	0.00184129	0.00148259	0.000820775		0	0.00140366	0.00477175	0.00955242		0.000735431	0.00159102	0.00217625	0.00286198		0.00064572	0.00238418	0.0015927	0.00115363		0.000594274
Otu0005058	Bacteria	Proteobacteria	Deltaproteobacteria	Desulfobacterales	Desulfobacteraceae	unclassified		0.00183316	0.00133672		0.00323466	0.00153201		0.00293509	0.0038268	0.000545194	0.00163669		0.0013862	0.0021497	0.00300254	0.00303534		0.0023512	0.00193848	0.00324457	0.00321301		0.000660156	0.00301933	0.00391796	0.00301937		0.00439243	0.00222404	0.00363254	0.00230821		0.00282284	0.00233793	0.00289075	0.00168467		0.0032431	0.00209309	0.0032235	0.00317742		0.00248027
Otu0005132	Bacteria	Proteobacteria	Deltaproteobacteria	Desulfobacterales	Desulfobacteraceae	unclassified		0.000527127	0.000897432		0.00836119	0.00221734		0.00106025	0.00128672	0	0.000511862		0.000761635	0.000609604	0.000416105	0		0.000286625	0.000572343	0.000854096	0.000373144		0	0.000333247	0	0.000492426		0.00722371	0.00843908	0.00592405	0.00551031		0.0074354	0.00311999	0.00105469	0.00108158		0.00926362	0.0100234	0.00887104	0.00514973		0.00952205
Otu0005134	Bacteria	Proteobacteria	Deltaproteobacteria	Syntrophobacterales	Syntrophobacteraceae	Syntrophobacter		8.00097e-05	0.000277162		0.00238159	0.00178981		0.000320039	0.000700449	0.000351729	0.00149644		0	0.000333774	0	0		0	0	0.00125715	0.000564742		0	0.000333247	0.000409913	0		0.00391995	0.00313427	0.00480849	0.0104955		0.00190898	0.00375351	0.0029467	0.00429732		0.00153923	0.00425536	0.00425337	0.00791468		0.00215819
Otu0005153	Bacteria	Proteobacteria	Deltaproteobacteria	Desulfobacterales	Desulfobacteraceae	Desulfobacterium		0.000802196	0.000948209		0.0029027	0.00200331		0.000549294	0.000293138	0.000933695	0.000468441		0.000680712	0.0022463	0.000369038	0.00144792		0.000585048	0.00163295	0.000914837	0.00112948		0.00139373	0.000884338	0.00122974	0		0.0018415	0.00366572	0.00277202	0.00420644		0.00188871	0.00402947	0.00283479	0.00301571		0.00510276	0.0029812	0.0029736	0.00414023		0.00277783
Otu0005155	Bacteria	Proteobacteria	Deltaproteobacteria	Desulfobacterales	Desulfobulbaceae	Desulfocapsa		0.00142063	0.000966789		0.00107054	0.00127917		0.00177128	0.0013201	0.00464759	0.00864191		0.0010863	0.00120632	0.00104614	0.000663733		0.00169854	0.00275766	0.0030214	0.0015934		0.00112642	0.00150804	0.00259438	0.00180993		0.000659436	0.0035781	0.00154372	0.00542155		0.000795146	0.00462206	0.00295762	0.00220075		0.00064572	0.00483695	0.00332623	0.000643716		0.00218187
Otu0005177	Bacteria	Proteobacteria	Deltaproteobacteria	Syntrophobacterales	Syntrophobacteraceae	unclassified		0.00303544	0.00184441		0.00238896	0.00170519		0.00350994	0.00144833	0.00221755	0.00139534		0.00353403	0.00206599	0.00207836	0.00441569		0.00242981	0.00291375	0.00176893	0.00180247		0.00266796	0.00247634	0.00354911	0.00320517		0.00330392	0	0.00146773	0.00239697		0.00180927	0.00272484	0.00150133	0.00305343		0.00263613	0.00269011	0.00273004	0.00308478		0.0018065
Otu0005266	Bacteria	Proteobacteria	Deltaproteobacteria	Desulfobacterales	Desulfobacteraceae	unclassified		0.000470691	0.000779467		0.00545386	0.00330796		0	0	0.000193466	0.000511862		0.00106153	0.0011355	0.000785143	0.000995599		0.000286625	0.00179445	0.000286261	0.000655515		0.000534608	0.000626945	0.000593035	0.000984853		0.00484658	0.00374624	0.00499893	0.00578976		0.00467172	0.00320648	0.00321456	0.000574084		0.00666535	0.00316479	0.00733604	0.00257486		0.00563178
Otu0005343	Bacteria	Proteobacteria	Deltaproteobacteria	Syntrophobacterales	Syntrophobacteraceae	unclassified		0.00194706	0.0017397		0.00271607	0.00196324		0.00220423	0.000293138	0.000896923	0.0011177		0.000680712	0.00121921	0.00318547	0.000856107		0.00199537	0.00298451	0.00148502	0.00243046		0.00290793	0.00147336	0.00243276	0.00196971		0.00278129	0.00231389	0.00230376	0.00155694		0.00105357	0.00324741	0.00118298	0.0025458		0.00395658	0.00216054	0.00259129	0.0022212		0.00307285
Otu0005347	Bacteria	Proteobacteria	Deltaproteobacteria	Syntrophobacterales	Syntrophaceae	Desulfomonile		0.0025039	0.00166557		0.00130291	0.00143731		0.00198775	0.00120592	0.00198731	0.00238705		0.00415101	0.00182881	0.00386257	0.000731307		0.00173234	0.00262695	0.00279822	0.00263953		0.00214448	0.00310166	0.00448233	0.00272998		0.00138736	0.00165232	0.000670944	0.00146132		0.000675714	0.00140979	0.00111064	0.00105258		0.00136407	0.000817208	0.00212218	0.00259732		0.00178452
Otu0005412	Bacteria	Proteobacteria	Deltaproteobacteria	Desulfobacterales	Desulfobulbaceae	Desulfocapsa		0.000834593	0.000848317		0.00105119	0.00124255		0.0011312	0.00442909	0.00413759	0.00373897		0.000786406	0.00248348	0.00206445	0.00159776		0.000618854	0.00260822	0.00370837	0.00341466		0.000801912	0.00339536	0.00300429	0.000410388		0.000385664	0.00368035	0.00565762	0.00457465		0.000377852	0.00263835	0.00032927	0.000861126		0.00187903	0.00319794	0.000884776	0.000580109		0.00156222
Otu0005441	Bacteria	Proteobacteria	Deltaproteobacteria	Syntrophobacterales	Syntrophobacteraceae	Syntrophobacter		0.00186528	0.00143422		0.0036012	0.00145753		0.00255688	0.00221357	0.00265714	0.0013085		0.000811178	0.00188676	0.00141517	0.000524241		0.00315446	0.00083916	0.00148736	0.00142933		0.000938589	0.00343329	0.000771605	0.00213398		0.00423713	0.00351304	0.00321578	0.00312075		0.00365798	0.00500897	0.00256694	0.00324461		0.00249087	0.00401744	0.00238375	0.00305021		0.00401882
Otu0005448	Bacteria	Proteobacteria	Deltaproteobacteria	Desulfobacterales	Desulfobacteraceae	unclassified		0.00476054	0.00152416		0.00352429	0.00204153		0.00343899	0.00452725	0.00253721	0.00317655		0.00598175	0.00589745	0.00457499	0.00378134		0.00438117	0.00282176	0.00199679	0.00353165		0.00524024	0.00390366	0.0033901	0.00439307		0.00339074	0.00384849	0.00472025	0.00710846		0.00337929	0.0039803	0.00184698	0.000698814		0.00331086	0.00667383	0.00555381	0.00331123		0.00401628
Otu0005452	Bacteria	Proteobacteria	Deltaproteobacteria	Syntrophobacterales	Syntrophobacteraceae	Syntrophobacter		0.00191556	0.00176569		0.00210343	0.00140846		0.00212393	0.00322647	0.00116079	0.00247675		0.00274004	0.00383146	0.00321863	0.00191928		0.000618854	0.00142482	0.00182264	0.00587002		0.00217943	0.00121758	0.00230241	0.000842313		0.00238905	0.001547	0.00124055	0.00127694		0.00115328	0.00225144	0.000719956	0.00289969		0.00241735	0.00134391	0.00119504	0.000707324		0.00245406
Otu0005476	Bacteria	Proteobacteria	Deltaproteobacteria	Desulfobacterales	Desulfobacterales_unclassified	unclassified		0.000444373	0.000829447		0.00441425	0.00259646		0.000581906	0.000326509	0.000705027	0.000702662		0	0.000333774	0.000369038	0.000399441		0.000928281	0.00102731	0	0.00095536		0.000267304	0.00099974	0.000593035	0.000699773		0.00321036	0.00556587	0.000683193	0.00327821		0.00467172	0.00477639	0.00334831	0.00505414		0.00462168	0.00612941	0.00271203	0.00382773		0.00515323
Otu0005477	Bacteria	Proteobacteria	Deltaproteobacteria	Desulfobacterales	Desulfobacteraceae	unclassified		0.00141723	0.00122963		0.00175608	0.00114575		0.00165493	0.000700449	0.00109353	0.00187091		0.000761635	0.000956263	0.000677098	0.00125555		0.00166473	0.00102731	0.00142427	0.00200281		0.00158761	0.00184777	0.00207107	0.00209501		0.00127546	0.00228909	0.0024296	0.00168692		0.00194842	0.000782057	0.00302996	0.00155994		0.0013447	0.00158182	0.00279675	0.00269655		0.00245575
Otu0005523	Bacteria	Proteobacteria	Deltaproteobacteria	Desulfobacterales	Desulfobacteraceae	unclassified		0.00392448	0.0018412		0.00502753	0.00206783		0.00451202	0.00245597	0.00202408	0.00279353		0.00521253	0.00411909	0.00229445	0.00158741		0.00206457	0.00334332	0.00279119	0.0015201		0.0039088	0.00121921	0.00304991	0.00209501		0.00523224	0.00321172	0.00425199	0.00329827		0.00504885	0.00269794	0.00407372	0.00108158		0.00467493	0.0043068	0.00309168	0.00288737		0.00515408
Otu0005567	Bacteria	Proteobacteria	Deltaproteobacteria	Desulfobacterales	Desulfobacteraceae	unclassified		0.000816919	0.000878811		0.00458012	0.00166962		0.000274647	0.000667078	0	0.00116825		0.00111107	0.000667548	0	0		0.000618854	0.000266816	0.000567835	0.000573479		0.0012631	0.000293699	0.000819827	0		0.00316695	0.00511271	0.00386223	0.0056128		0.004711	0.00207266	0.00229362	0.000794539		0.00618028	0.00789655	0.00523187	0.0101947		0.00426225
Otu0005580	Bacteria	Proteobacteria	Deltaproteobacteria	Desulfovibrionales	Desulfomicrobiaceae	Desulfomicrobium		0.000915785	0.00084024		0.000149176	0.000349816		0.000536514	0.00216614	0.00615854	0.023659		0.00136143	0.00162381	0	0.000331866		0.000848871	0.0013141	0.00296769	0.00445948		0.00091633	0.00176706	0.00179866	0.00123116		0.000273772	0.00197537	0.0029616	0.0108706		0	0.00107423	0.000390686	0.000382768		0	0.000527848	0.000294925	0.0020874		0.000322932
Otu0005598	Bacteria	Proteobacteria	Deltaproteobacteria	Syntrophobacterales	Syntrophaceae	Desulfobacca		0.000816676	0.00166616		0.00378374	0.00526166		0	0	0.000193466	0		0.000761635	0	0.000416105	0		0.000309427	0.000611055	0	0		0.00219564	0	0.000593035	0		0.00376482	0.00511187	0.00976007	0.0176927		0.000397573	0.00589039	0	0.00191384		0.0003398	0.00354564	0.00303397	0.00446307		0.0106328
Otu0005669	Bacteria	Proteobacteria	Deltaproteobacteria	Desulfobacterales	Desulfobulbaceae	Desulfocapsa		0.00179656	0.00171538		0.00210475	0.00125919		0.00334821	0.00102696	0.00189945	0.00327053		0.000680712	0.00249636	0.000785143	0.000663733		0.000585048	0.00145688	0.000910151	0.000946623		0.00257228	0.000961813	0.00150215	0		0.00120698	0.0033697	0.00195074	0.00429465		0.00250471	0.00332812	0.00282933	0.00312002		0.00317047	0.00401629	0.0037329	0.00380902		0.00153685
Otu0005821	Bacteria	Proteobacteria	Deltaproteobacteria	Desulfobacterales	Desulfobacteraceae	unclassified		0.00307667	0.00444487		0.00213823	0.00308795		0.000261867	0.00107439	0	0.000234221		0	0	0	0		0.0060923	0	0.00205389	0		0.00595253	0.00405537	0	0.000492426		0.00102677	0.00231695	0.0011637	0.00345573		0.00310115	0.00327677	0.00118844	0.000382768		0.00383158	0.0067796	0.00147463	0.00601989		0.000593426
Otu0005878	Bacteria	Proteobacteria	Deltaproteobacteria	Desulfovibrionales	Desulfovibrionaceae	Desulfovibrio		0.000146262	0.000342278		0.000175358	0.000409691		0	0.0019538	0.00545822	0.0142767		0	0.000609604	0.000785143	0.000524241		0.000585048	0	0.00148736	0.00102866		0	0.00029532	0.000409913	0		0.000342256	0.000624374	0.00251784	0.0110401		0	0.000687323	0.00032927	0		0.000359176	0.000272211	0.00058985	0.00093377		0
Otu0005882	Bacteria	Proteobacteria	Deltaproteobacteria	Desulfobacterales	Desulfobacteraceae	unclassified		0.00151338	0.0026161		0.00245168	0.00214076		0.00300834	0	0	0.00181323		0	0.0016485	0.000369038	0.00489739		0.00137811	0.00124875	0.00342575	0.00169291		0.00166708	0.00099974	0.00220858	0.00166309		0.00281812	0.00176781	0.000670944	0.00437763		0.00143142	0.00212401	0.000390686	0.00153094		0.000698976	0.00132733	0.00322617	0.00298002		0.00485822
Otu0006052	Bacteria	Proteobacteria	Deltaproteobacteria	Desulfobacterales	Desulfobacteraceae	unclassified		0.00112558	0.00115809		0.00340681	0.00213533		0.00146402	0.000946157	0.00073866	0.00224538		0.000299895	0.000346659	0.00030806	0.00125555		0.00181096	0.00174908	0.00153873	0.00301268		0.00092746	0.00213985	0.00145393	0.00117066		0.00143076	0.00188552	0.00226616	0.00292951		0.00385685	0.00161547	0.0019084	0.0011483		0.00410273	0.00209367	0.00325052	0.000892614		0.00423688
Otu0006078	Bacteria	Proteobacteria	Deltaproteobacteria	Syntrophobacterales	Syntrophobacterales_unclassified	unclassified		0.00365438	0.00214001		0.00192975	0.00153369		0.00204592	0.00513479	0.00327744	0.00363073		0.0019784	0.00229136	0.00323254	0.00462275		0.00489781	0.00392773	0.000567835	0.00283113		0.00569538	0.0058636	0.00286679	0.00172359		0.00270623	0.001547	0.00134189	0.000901302		0.00180927	0.00275174	0.00143991	0.00066981		0.00193716	0.00185633	0.000866764	0.00122382		0.00126636
Otu0006099	Bacteria	Proteobacteria	Deltaproteobacteria	Desulfobacterales	Desulfobacteraceae	unclassified		0.000983064	0.000906892		0.00152804	0.00129576		0.00110564	0.000326509	0.00234375	0.0011177		0.000680712	0.00146927	0.00115418	0.00106317		0.000871673	0.00209457	0.00176893	0.000373144		0.00127423	0.000884338	0.000385802	0		0.00134395	0.00224883	0.00208882	0.00305948		0.00157057	0.0012637	0.0019084	0.00108158		0.00257801	0.00182031	0.00232338	0.00102642		0.000619645
Otu0006115	Bacteria	Proteobacteria	Deltaproteobacteria	Syntrophobacterales	Syntrophobacteraceae	unclassified		0.00220779	0.00127174		0.00178671	0.00112019		0.00245331	0.000667078	0.00163715	0.00247675		0.00198599	0.00218728	0.00129322	0.000524241		0.00146772	0.00114469	0.00199679	0.00151136		0.00292413	0.00218102	0.00437349	0.0013132		0.00200338	0.00119609	0.00141788	0.00451338		0.00180872	0.00249226	0.00189747	0.00117731		0.000932263	0.00314764	0.00275439	0.00244765		0.00240247
Otu0006116	Bacteria	Proteobacteria	Deltaproteobacteria	Desulfobacterales	Desulfobacteraceae	Desulfobacterium		0.00238389	0.00410279		0.00339929	0.00676411		0.000856553	0.00128672	0.00141319	0.00126508		0.000705484	0.00155298	0.00114027	0.0027607		0.00527061	0.000266816	0.00102695	0.00095536		0.00270291	0.000961813	0.00245687	0.00231959		0	0.000636772	0.00168431	0.00136514		0.000397573	0.00544723	0.0015682	0.00149335		0.0104987	0.00212739	0.00122206	0.00348993		0.00270087
Otu0006131	Bacteria	Proteobacteria	Deltaproteobacteria	Desulfobacterales	Desulfobacteraceae	unclassified		0.00242726	0.00367715		0.00134514	0.00129967		0.00299556	0.00169404	0.00179698	0.00187376		0.00329885	0.00253394	0.00352669	0.00179448		0.000551242	0.00254953	0.0075909	0.00487894		0.00286341	0	0.000771605	0.00231959		0.000889799	0.00139126	0.00178565	0		0.000715709	0.0021567	0.0011161	0.00136862		0.00139795	0.000817783	0.00183626	0.00196019		0.00237709
Otu0006203	Bacteria	Proteobacteria	Deltaproteobacteria	Desulfobacterales	Desulfobulbaceae	Desulfocapsa		0.00241165	0.00186495		0.00132774	0.00103441		0.00243348	0.00293333	0.00237895	0.00809439		0.00310367	0.00360609	0.00166226	0.00271816		0.00177715	0.00351815	0.00154107	0.00472438		0.00233232	0.00213823	0.00188795	0.00271275		0.00227715	0.00195058	0.00165731	0.00473898		0.00139142	0.00248402	0.000396146	0.000382768		0.000698976	0.00107227	0.00149898	0.000580109		0.000943424
Otu0006256	Bacteria	Proteobacteria	Deltaproteobacteria	Syntrophobacterales	Syntrophaceae	Desulfobacca		0.00129201	0.00169472		0.0025168	0.00163188		0.00108581	0	0.00163872	0.00154272		0.000380817	0.00119344	0.00061612	0.000923682		0.00209758	0.000208125	0.000283917	0.000373144		0.00160382	0.00125389	0.00109223	0.00223755		0.00207187	0.00191032	0.00250559	0.00777675		0.00180927	0.00340392	0.00105469	0.00228789		0.00221883	0.00161784	0.00415063	0.00365277		0.00396723
Otu0006312	Bacteria	Proteobacteria	Deltaproteobacteria	Desulfobacterales	Desulfobulbaceae	Desulfocapsa		0.00108724	0.00143459		0.00147962	0.00133105		0.00236596	0.000912786	0.00359083	0.0038144		0.00114245	0.000596719	0.00181737	0.000731307		0.00057325	0	0.002963	0.000373144		0.000267304	0.00147498	0.00157187	0.0011922		0.00154923	0.00234175	0.00288561	0.00270335		0.000755704	0.00062773	0.00105469	0.00105258		0.00207755	0.00267354	0.00130678	0.00196019		0.001536
Otu0006378	Bacteria	Proteobacteria	Deltaproteobacteria	Syntrophobacterales	Syntrophobacteraceae	Syntrophobacter		0.000330781	0.000492426		0.00173181	0.00122963		0.000320039	0.000293138	0	0.000562414		0.000380817	0	0.00061612	0.000856107		0.000286625	0.000305527	0.000283917	0.000282371		0.000335643	0.00029532	0.000409913	0		0.0018415	0.00327678	0.0011392	0.00255387		0.000337857	0.00267349	0.00229362	0.00543691		0.00261676	0.0018729	0.00155034	0.00162898		0.00213112
Otu0006390	Bacteria	Proteobacteria	Deltaproteobacteria	Syntrophobacterales	Syntrophobacteraceae	unclassified		0.00170935	0.00166614		0.00198713	0.00126796		0.00184585	0.00102696	0.000703457	0.0023365		0.00268389	0.00155298	0.00193932	0.00217923		0.0011701	0.00102731	0.00125247	0.00309603		0.00113755	0.000293699	0.00129947	0.000492426		0.0016862	0.00068943	0.00143013	0.00227386		0.00145114	0.00287093	0.00222128	0.00200085		0.00302919	0.00243447	0.00187862	0.00106099		0.00178197
Otu0006422	Bacteria	Proteobacteria	Deltaproteobacteria	Syntrophobacterales	Syntrophaceae	Desulfobacca		0.00151251	0.00166718		0.00168823	0.00121899		0.00134767	0.00169404	0.00233904	0.00168011		0.000705484	0.00188676	0.000677098	0.000798882		0.0011811	0.00306318	0.00142193	0.00152884		0.00281577	0.00150966	0.0020059	0.00242336		0.00111358	0.00102795	0.00287336	0.00279953		0.00107329	0.00161547	0.000390686	0.00149335		0.00302919	0.00132733	0.00148997	0.00093377		0.00153685
Otu0006445	Bacteria	Proteobacteria	Deltaproteobacteria	Desulfobacterales	Desulfobacteraceae	unclassified		0.00233608	0.00218773		0.00125654	0.00111878		0.0016351	0.000653019	0.00202408	0.00228167		0.00271624	0.000930493	0.00150931	0.000923682		0.00165373	0.00186646	0.000283917	0.00274036		0.00333925	0.00151128	0.00100295	0.00228082		0.00116357	0.000701828	0.00483549	0.00183695		0.00141114	0.00251916	0.000786832	0.00203843		0.000912887	0.00102025	0.00175154	0.000643716		0.00153854
Otu0006570	Bacteria	Proteobacteria	Deltaproteobacteria	Desulfobacterales	Desulfobacteraceae	unclassified		0.000932753	0.00131343		0.000310034	0.00061718		0.000261867	0.00208203	0.00179855	0.000468441		0.00114245	0.00119344	0.000724165	0.00171221		0.000551242	0.000533632	0.000342316	0.00218435		0.00177545	0.00159038	0.00188795	0.000410388		0	0	0.000557353	0.000375633		0	0.000386909	0.00118298	0		0	0	0.000632212	0.000799969		0.00124014
Otu0006653	Bacteria	Proteobacteria	Deltaproteobacteria	Syntrophobacterales	Syntrophobacteraceae	unclassified		0.000760273	0.00128329		0.000678543	0.000976959		0.000320039	0.000326509	0.000546764	0.000468441		0.00182316	0.00313066	0.00384866	0.00165499		0.000562246	0.00154096	0.000628576	0.00225765		0.000335643	0.00188246	0.000771605	0.00699773		0.00072792	0.00959714	0.00436644	0.00519017		0.000337857	0.000240822	0.00164635	0.000574084		0.000679599	0.000255062	0.000285919	0.00382667		0.000968795
Otu0006687	Bacteria	Proteobacteria	Deltaproteobacteria	Desulfobacterales	Desulfobacteraceae	unclassified		0.00180761	0.00180652		0.00212797	0.000723053		0.00118937	0.000619648	0.00151252	0.00339936		0.00144235	0.000943378	0.00170932	0.00284296		0.00280102	0.00187979	0.00398526	0.00254876		0.00179771	0.00306212	0.00281857	0.00217705		0.00234564	0.000350914	0.00125279	0.00223952		0.00182899	0.00201062	0.00177464	0.0036941		0.00161186	0.00241675	0.00183626	0.000997378		0.0027254
Otu0006742	Bacteria	Proteobacteria	Deltaproteobacteria	Desulfovibrionales	Desulfovibrionaceae	unclassified		0.00258462	0.0018309		0.000883239	0.000885281		0.00308061	0.00289996	0.00315124	0.00919291		0.00410905	0.00112261	0.000677098	0.000731307		0.00168674	0.00102731	0.00148033	0.00314845		0.00146207	0.000293699	0.00111634	0.000760274		0.000342256	0.00149435	0.00191149	0.00986623		0.00182899	0.00155587	0.00145083	0.000382768		0.00103878	0	0.000909125	0.000997378		0.000322932
Otu0006795	Bacteria	Proteobacteria	Deltaproteobacteria	Desulfobacterales	Desulfobacteraceae	unclassified		0.000991001	0.0010254		0.00171796	0.00128388		0.000261867	0.000586276	0.000545194	0.000277641		0.00154804	0.00136087	0.000985158	0.000331866		0.0011583	0.00205461	0	0.000746288		0.000995798	0.00117804	0	0.00111016		0.00123206	0.00446047	0.00184775	0.00183695		0.00184871	0.0016833	0	0.00124389		0.00136407	0.00260207	0.00313404	0.00256275		0.00242699
Otu0006851	Bacteria	Proteobacteria	Deltaproteobacteria	Desulfobacterales	Desulfobacteraceae	unclassified		0.00255934	0.00205729		0.000286544	0.000992616		0.00154202	0.000700449	0.00228795	0.00182464		0.00195363	0.00200264	0	0		0.00379532	0	0	0.00682616		0.00294639	0.00335744	0.00367161	0.00104966		0	0.000677032	0.0011637	0.00248517		0	0.000240822	0	0.00153107		0.00114617	0.000510125	0.000623206	0.000353662		0
Otu0006854	Bacteria	Proteobacteria	Deltaproteobacteria	Desulfobacterales	Desulfobacteraceae	unclassified		0.000590732	0.000722988		0.00627353	0.00264861		0.000261867	0.000326509	0.000900062	0.000277641		0.00146712	0	0	0		0.000309427	0	0.000626233	0.000873324		0.000324513	0.000960192	0	0		0.00444242	0.00484858	0.00680993	0.00529899		0.00689812	0.00291431	0.00145083	0		0.00832648	0.0053122	0.00155034	0.00186754		0.00542712
Otu0006915	Bacteria	Proteobacteria	Deltaproteobacteria	Syntrophobacterales	Syntrophobacteraceae	Syntrophobacter		0.00123673	0.00110215		0.00105105	0.000733448		0.00228223	0.00190637	0.00124865	0.0014993		0.00149189	0.00112261	0.00187835	0.00225115		0.000905479	0.00178238	0.00199445	0.000946623		0.000267304	0.00151128	0.00145393	0.000699773		0.000933207	0.000857574	0.000392268	0.00103128		0.000715709	0.000481643	0	0.00165567		0.00161186	0.00132676	0.000909125	0.00128743		0.000943424
Otu0006920	Bacteria	Proteobacteria	Deltaproteobacteria	Syntrophobacterales	Syntrophobacteraceae	Syntrophobacter		0.00187155	0.00132168		0.000657441	0.000823373		0.00122198	0.00260682	0.000705027	0.000656388		0.00114245	0.00210356	0.00261642	0.000995599		0.0023394	0.0019185	0.00136926	0		0.00278238	0.00269256	0.00100295	0.00172359		0	0.000350914	0.000569602	0.000751267		0.00111328	0.000600828	0.000390686	0.00124389		0.000626343	0.000272211	0.00120405	0		0.000890139
Otu0006938	Bacteria	Proteobacteria	Deltaproteobacteria	Syntrophobacterales	Syntrophobacteraceae	Syntrophobacter		0.00309854	0.00368871		0.000734553	0.00201299		0.00706317	0.00175883	0	0		0	0.00250817	0	0.0026212		0.00292524	0	0.000342316	0.00169423		0.00240574	0.00177192	0	0.000984853		0	0	0.00261833	0.00578345		0	0.00216739	0.0017801	0.00584868		0.00229235	0.000272786	0.00324418	0.000736361		0.000645863
Otu0006984	Bacteria	Proteobacteria	Deltaproteobacteria	Desulfobacterales	Desulfobacteraceae	unclassified		0.00163253	0.00136504		0.00199993	0.00150602		0.00123476	0.00127267	0.00144526	0.00205886		0.00144235	0.00237507	0.000985158	0.00231872		0.000871673	0.00314061	0.000910151	0.000573479		0.00298134	0.00180498	0.00209518	0.00266948		0.00150583	0.00327678	0.00203733	0.000280009		0.00115328	0.00101464	0.0022322	0.000794539		0.00197104	0.00134506	0.00208883	0.00234842		0.00336957
Otu0007010	Bacteria	Proteobacteria	Deltaproteobacteria	Syntrophobacterales	Syntrophobacteraceae	unclassified		0.00253237	0.00245367		0.0011573	0.00128159		0.00198775	0.00206798	0.00147889	0.00321284		0.00106153	0.00180304	0.00306352	0.00272851		0.004759	0.00154096	0.00238814	0.00292322		0.00232119	0.00125551	0.00609982	0.00207348		0.00123206	0.000636772	0.000569602	0.000560017		0.000755704	0.00140979	0.000725416	0.000956852		0.00107753	0.00107285	0.00182726	0.00116022		0.00156392
Otu0007049	Bacteria	Proteobacteria	Deltaproteobacteria	Syntrophobacterales	Syntrophaceae	Desulfomonile		0.00230626	0.000916518		0.00105277	0.00101203		0.00261505	0.00228031	0.000353298	0.00224253		0.00285332	0.00249636	0.00160128	0.00106317		0.00229459	0.00283633	0.00142427	0.00246673		0.00146207	0.00206237	0.00177455	0.00230236		0.00111358	0.0013262	0.00096187	0.00186388		0.001133	0.00161547	0.000390686	0.000411772		0.000698976	0.000799484	0.00121306	0.00173374		0.00126551
Otu0007059	Bacteria	Proteobacteria	Deltaproteobacteria	Syntrophobacterales	Syntrophobacteraceae	Syntrophobacter		0.000543534	0.000609047		0.00118875	0.00143531		0.000320039	0.000373939	0.00195682	0.000234221		0.000680712	0.00213682	0.000724165	0.000663733		0.000848871	0.00083916	0.000567835	0.00187577		0.000324513	0.00158714	0.000771605	0.000410388		0.0010451	0.000285858	0.00240425	0.000682571		0.00151141	0.000987737	0	0.000574084		0.00157798	0.000527273	0.000623206	0.00093377		0.000620492
Otu0007074	Bacteria	Proteobacteria	Deltaproteobacteria	Desulfobacterales	Desulfobacteraceae	Desulfobacterium		0.002067	0.0012472		0.00122176	0.00105387		0.00278613	0.00170809	0.00109196	0.00116825		0.0010863	0.00161093	0.00114027	0		0.00313245	0.00239344	0.0021089	0.00150263		0.0012631	0.00158876	0.00207107	0.0024449		0.00120698	0.000975288	0.000278677	0.0010582		0.00147141	0.000300414	0.00111064	0.0024212		0.00129144	0.00156525	0.00124641	0.00122382		0.000917205
Otu0007098	Bacteria	Proteobacteria	Deltaproteobacteria	Syntrophobacterales	Syntrophobacteraceae	Syntrophobacter		0.000673889	0.000824401		0.00144916	0.000702166		0.00140585	0.000700449	0.000932125	0.0019072		0.000380817	0.000609604	0.00030806	0.000399441		0.00057325	0.00119672	0.00148033	0.000746288		0.000335643	0.00029532	0.000409913	0.0012527		0.00161772	0.00096289	0.00221466	0.0103919		0.00107329	0.00338526	0.00151225	0.00108158		0.00127206	0.0010374	0.00180291	0.00173374		0.00183356
Otu0007174	Bacteria	Proteobacteria	Deltaproteobacteria	Syntrophobacterales	Syntrophobacteraceae	unclassified		0.00107086	0.000771714		0.00142875	0.00079635		0.00111842	0.000326509	0.000386931	0.00219483		0.0010863	0.000956263	0.000738075	0.000524241		0.000837867	0.00127539	0.000912494	0.00180247		0.00124084	0.000961813	0.00159143	0.00139955		0.00127546	0.0036029	0.0018224	0.00692463		0.00184871	0.0035069	0.00111064	0.00161808		0.00132532	0.002892	0.00241711	0.00567656		0.00126551
Otu0007228	Bacteria	Proteobacteria	Deltaproteobacteria	Desulfobacterales	Desulfobacteraceae	unclassified		0.00127982	0.00112199		0.0025023	0.00107642		0.00109859	0.000700449	0.00163872	0.00121452		0.00146712	0.000596719	0.00155637	0.000663733		0.00201897	0.00169705	0.00148267	0.00236722		0.000534608	0.00059064	0.00166116	0.00349456		0.00223375	0.00313427	0.000848278	0.00146819		0.00216685	0.00251916	0.00261197	0.00222975		0.00223821	0.00209195	0.00252885	0.00311382		0.00337041
Otu0007324	Bacteria	Proteobacteria	Deltaproteobacteria	Desulfobacterales	Desulfobacteraceae	unclassified		0.000267304	0.000925968		0.000931715	0.00153493		0	0.000700449	0.00109353	0.00277641		0	0	0	0		0	0.000832501	0.0026324	0.0017117		0.00106922	0.00059064	0.000409913	0		0.000385664	0.00274309	0.00411391	0.0083167		0.000795146	0.0016833	0.00150679	0.000823543		0.0013592	0.00267124	0.00182726	0.00174033		0.00118685
Otu0007357	Bacteria	Proteobacteria	Deltaproteobacteria	Syntrophobacterales	Syntrophaceae	Desulfobacca		0.00108152	0.00126472		0.00133677	0.00104849		0	0.000293138	0.000386931	0.000656388		0.00111107	0.00146927	0.000369038	0.000856107		0.000882677	0.00143023	0.00153873	0.000573479		0.00233232	0.000293699	0.000296518	0.000984853		0.000684512	0.00187312	0.000784535	0.00501212		0.00111328	0.0021567	0.00151225	0.000574084		0.00141733	0.00134563	0.00184527	0.00202379		0.00213197
Otu0007377	Bacteria	Proteobacteria	Deltaproteobacteria	Desulfobacterales	Desulfobacteraceae	unclassified		0.000772905	0.00109201		0.00167794	0.00130119		0.00106025	0.000373939	0.000932125	0.00102372		0.000405589	0.00127715	0.00150931	0.00132312		0.000618854	0.00212662	0.000912494	0.00122899		0.00100693	0.000882717	0.000706431	0.00180563		0.0010451	0.00336747	0.000670944	0.00217824		0.00254415	0.000868552	0.00309137	0.00213416		0.00161186	0.003421	0.000918131	0.00204624		0.00151063
Otu0007384	Bacteria	Proteobacteria	Deltaproteobacteria	Desulfobacterales	Desulfobacteraceae	unclassified		0.00224777	0.00107092		0.00128525	0.000749239		0.0017585	0.00198717	0.000546764	0.000555283		0.0024725	0.00453658	0.00083221	0.000995599		0.00255841	0.000683066	0.000628576	0.00123773		0.00220169	0.000884338	0.00234348	0.00111016		0.00154923	0.00161206	0.000392268	0		0.00111328	0.000928144	0.000792293	0.000287042		0.000966143	0.00078291	0.000580845	0.00138008		0.00151233
Otu0007410	Bacteria	Proteobacteria	Deltaproteobacteria	Desulfobacterales	Desulfobacteraceae	unclassified		0.00231695	0.00142609		0.00272975	0.00148753		0.00164215	0.00104102	0.00186739	0.000234221		0.00252865	0.000693318	0.00115418	0.00125555		0.0035205	0.00236139	0.002963	0.00296691		0.00157649	0.000922265	0.00122974	0.00158105		0.00298	0.00162446	0.00318878	0.00271077		0.00326041	0.00189143	0.00151225	0.00168467		0.00227696	0.00243447	0.00314305	0.00420384		0.00240162
Otu0007414	Bacteria	Proteobacteria	Deltaproteobacteria	Desulfovibrionales	Desulfovibrionaceae	Desulfovibrio		0.00224665	0.00150457		0.000264052	0.000662976		0.00204592	0.00361447	0.0097734	0.0133106		0.00308947	0.000346659	0.000785143	0.00139504		0.00198516	0.00156094	0.000626233	0.00200281		0.00186605	0.000922265	0.000409913	0.000492426		0	0.000571716	0.00327788	0.0109593		0.000337857	0.000687323	0	0.000287042		0.000718352	0	0.000285919	0.000290054		0
Otu0007483	Bacteria	Proteobacteria	Deltaproteobacteria	Desulfobacterales	Desulfobacteraceae	unclassified		0.000205785	0.000372615		0.00307313	0.00180919		0.000536514	0.000373939	0.000351729	0.000328194		0	0	0	0.000524241		0.000286625	0.000208125	0	0.00123773		0	0.000293699	0.000409913	0.000410388		0.00323544	0.00068943	0.00211332	0.00103128		0.00439341	0.00159102	0.0013785	0.000574084		0.00153923	0.00214454	0.00222492	0.00357224		0.00312444
Otu0007563	Bacteria	Proteobacteria	Deltaproteobacteria	Desulfobacterales	Desulfobulbaceae	Desulfobulbus		0.00124309	0.00104818		0.00041213	0.000673419		0.00177128	0.000879415	0.000580397	0.000980303		0.00106153	0.00171933	0.000724165	0.000399441		0.00149053	0.00083916	0.00148033	0.0015201		0.000649026	0.00146849	0.000978838	0.00146005		0.000385664	0.00302895	0.00201283	0.00102386		0	0.00219184	0.00183606	0.00270824		0.000966143	0.00238188	0.00155935	0.000643716		0.000296713
Otu0007644	Bacteria	Proteobacteria	Deltaproteobacteria	Desulfobacterales	Desulfobacteraceae	unclassified		0.000724744	0.00101821		0.00196532	0.00121125		0.000261867	0.000293138	0.000706596	0.0019072		0.00144235	0	0.0010932	0		0	0.000683066	0.000626233	0.0028224		0.00119476	0.000626945	0.000771605	0.000492426		0.00321036	0.00305598	0.00410166	0.00292951		0.00184871	0.00146938	0.000786832	0.00111059		0.00064572	0.00347245	0.00391608	0.0043086		0.00215649
Otu0007712	Bacteria	Proteobacteria	Deltaproteobacteria	Desulfobacterales	Desulfobacteraceae	unclassified		0.00105998	0.00101074		0.00210732	0.00111701		0.000549294	0.0014009	0.000193466	0.000883476		0.00149189	0.00087255	0.00155637	0.00139504		0.000286625	0.00245213	0.00131321	0.000946623		0.00191213	0.00205913	0	0		0.00143734	0.000677032	0.00318878	0.00137256		0.00228628	0.00108247	0.000390686	0.00111059		0.00227696	0.00240133	0.000285919	0.000643716		0.00242868
Otu0007769	Bacteria	Proteobacteria	Deltaproteobacteria	Syntrophobacterales	Syntrophobacteraceae	unclassified		0.000652296	0.00077497		0.00152114	0.00108058		0.000798381	0.000747879	0.00073866	0.00112483		0	0.0015401	0.000738075	0.000399441		0.000894475	0.000266816	0.000286261	0.000373144		0.00091633	0.000293699	0.00068232	0.00152055		0.00134395	0.00223643	0.00106321	0.00357773		0.00186843	0.000687323	0.000390686	0.000861126		0.0016845	0.0010557	0.00183626	0.00151388		0.0011877
Otu0007814	Bacteria	Proteobacteria	Deltaproteobacteria	Desulfobacterales	Desulfobacteraceae	unclassified		0.000373356	0.000590694		0.00128427	0.00108595		0.000320039	0.00170809	0	0.00316514		0	0.000525891	0	0		0.000848871	0.000305527	0.00159478	0.00295817		0.000324513	0	0.000795716	0		0.00130054	0.00297852	0.00550729	0.00850851		0.00190843	0.000240822	0.00032927	0.000698814		0.000985519	0.00129246	0.00361215	0.00550339		0.000942576
Otu0007874	Bacteria	Proteobacteria	Deltaproteobacteria	Syntrophobacterales	Syntrophobacteraceae	Syntrophobacter		0.000812956	0.000859449		0.00124618	0.00126658		0.000869333	0.0015658	0.00109196	0.0019072		0.00111107	0.00127715	0.00030806	0.000731307		0.000275621	0.00171037	0.000570178	0.00085585		0.000995798	0.000293699	0.000706431	0		0.000659436	0	0.00220242	0.00361208		0	0.00114206	0.00098781	0.000411772		0.00249087	0.00107342	0.00231437	0.00337483		0.00183441
Otu0007938	Bacteria	Proteobacteria	Deltaproteobacteria	Desulfobacterales	Desulfobacteraceae	unclassified		6.89052e-05	0.000238695		0.00148908	0.00137446		0	0.000747879	0.000353298	0		0	0	0	0.000524241		0.000275621	0	0.000286261	0		0	0.000628566	0.000296518	0		0.00263774	0.00213112	0.00372164	0.00704719		0.00111328	0.00279267	0.000786832	0		0.00161186	0.00129303	0.00432275	0.00327007		0.000593426
Otu0007964	Bacteria	Proteobacteria	Deltaproteobacteria	Desulfobacterales	Desulfobacteraceae	unclassified		0.0023745	0.00310634		0.000390555	0.000943208		0.00164788	0.000293138	0.00125336	0.000936882		0.00468407	0	0.000738075	0.000663733		0.000894475	0	0.00233781	0		0.00227159	0.00117966	0.00347222	0.00229805		0	0.00140366	0.00167206	0.00198643		0	0	0	0.000287042		0	0	0.000285919	0		0.00156222
Otu0008021	Bacteria	Proteobacteria	Deltaproteobacteria	Syntrophobacterales	Syntrophobacteraceae	unclassified		0.000366688	0.000705158		0.00213497	0.00133671		0.000274647	0.000373939	0.000705027	0.000840056		0	0	0	0.000331866		0.0011921	0.000721778	0.000342316	0		0	0.000587397	0.000795716	0.000492426		0.00222717	0.0013138	0.00112696	0.00279953		0.00184871	0.00269794	0.00104923	0.00187612		0.00173775	0.00267354	0.0026093	0.00276016		0.00272624
Otu0008039	Bacteria	Proteobacteria	Deltaproteobacteria	Desulfovibrionales	Desulfomicrobiaceae	Desulfomicrobium		0.000520317	0.000809478		0	0		0.000536514	0.00172741	0.00327587	0.0061986		0.000899685	0.00209176	0.00104614	0.00377099		0.000309427	0.00119672	0.00188104	0.00209358		0.000335643	0.00117804	0.000706431	0.00301937		0	0	0.000290925	0.000716919		0	0.000386909	0.00032927	0		0	0.000782336	0	0.000799969		0
Otu0008041	Bacteria	Proteobacteria	Deltaproteobacteria	Desulfobacterales	Desulfobacteraceae	unclassified		0.00128008	0.00140251		0.00214719	0.0017469		0.000960117	0.000293138	0.000353298	0.00153986		0.00166132	0.000788836	0.00110711	0		0.000837867	0.000611055	0.00113801	0.000655515		0.00166103	0.000293699	0.000409913	0.000902814		0.00120698	0.00479899	0.00385973	0.0072247		0.00375714	0.00200238	0.0015682	0.000823543		0.00211232	0.00185518	0.000294925	0.00244106		0.00151233
Otu0008142	Bacteria	Proteobacteria	Deltaproteobacteria	Desulfobacterales	Desulfobacteraceae	unclassified		0.00179119	0.0026221		0.000740725	0.000920978		0.00082394	0.000373939	0	0.000468441		0.000380817	0.00134798	0.000724165	0.000399441		0.00407015	0.000721778	0.00290799	0.000282371		0.00188987	0.000587397	0.00136464	0.000699773		0.00072792	0.000350914	0.000557353	0.000962579		0.000755704	0	0.000719956	0.000698814		0.000859631	0.000255062	0.00150798	0.00133892		0.000619645
Otu0008153	Bacteria	Proteobacteria	Deltaproteobacteria	Desulfobacterales	Desulfobacteraceae	unclassified		0.000199119	0.000496684		0.00283278	0.00159339		0.000261867	0.000373939	0.000353298	0.000511862		0	0.000262945	0.000369038	0.000331866		0	0	0.000912494	0.000946623		0.000534608	0.000589018	0	0.000349886		0.00223375	0.00276789	0.00264618	0.0056477		0.00371715	0.00176979	0.0013785	0.00149335		0.00238347	0.00212739	0.00313404	0.00373508		0.00299674
Otu0008205	Bacteria	Proteobacteria	Deltaproteobacteria	Desulfobacterales	Desulfobacteraceae	unclassified		0.00108517	0.00104462		0.000951599	0.000883408		0.000914725	0.000373939	0.000351729	0.000789503		0.00144235	0.0021497	0.00124831	0.00139504		0.00112449	0.00207459	0.00102695	0.00244925		0.000859121	0.00180822	0.00136464	0.00172359		0.0010451	0.00136646	0.00169656	0.00093565		0.001173	0.000928144	0.00150679	0.00139763		0.00064572	0.000782336	0.000918131	0.00115363		0.000942576
Otu0008248	Bacteria	Proteobacteria	Deltaproteobacteria	Syntrophobacterales	Syntrophaceae	Desulfobacca		0.00105609	0.00100016		0.00153028	0.00144532		0.000901945	0.000619648	0.00073866	0.000832924		0.001192	0.00112261	0.000369038	0		0.000286625	0.000305527	0.00119407	0.000946623		0.00184379	0.000293699	0	0		0.000958284	0.00124875	0.00369464	0.00358515		0.00180872	0.00108247	0.0024946	0.00190512		0.00179189	0.00161727	0.00207081	0.00164109		0.00156222
Otu0008294	Bacteria	Proteobacteria	Deltaproteobacteria	Desulfobacterales	Desulfobacteraceae	unclassified		0.000891991	0.000922683		0.00432723	0.00246689		0.00117659	0	0.000193466	0.000511862		0.000761635	0.000333774	0	0.000798882		0.000309427	0	0.000567835	0.000282371		0.00132031	0.000293699	0.000296518	0		0.00378298	0.00463084	0.0030262	0.00327079		0.00379714	0.00176979	0.00032927	0.000287042		0.00320435	0.00425421	0.00298894	0.00273112		0.00652446
Otu0008411	Bacteria	Proteobacteria	Deltaproteobacteria	Desulfobacterales	Desulfobulbaceae	Desulfobulbus		0.000603554	0.00085968		0.000627253	0.000862817		0.000261867	0.000619648	0.000932125	0.00135905		0.000405589	0.000346659	0.000416105	0.00139504		0.00141112	0.00104729	0.000626233	0.000655515		0.000335643	0.00154921	0.000296518	0.00146005		0.000771328	0.00291347	0.00135414	0.00326337		0.00145114	0.00122856	0.0011161	0.00168467		0.000286544	0.003421	0.0029646	0.0017047		0
Otu0008443	Bacteria	Proteobacteria	Deltaproteobacteria	Desulfobacterales	Desulfobacteraceae	unclassified		0.000140318	0.000327802		0.00289762	0.00155402		0.000274647	0	0	0		0	0	0	0		0.000286625	0	0	0		0	0	0	0		0.00366451	0.00092263	0.000557353	0.00127694		0.00375714	0.0017102	0.000719956	0.00120631		0.0029033	0.00136221	0.00300696	0.000643716		0.00126551
Otu0008486	Bacteria	Proteobacteria	Deltaproteobacteria	Desulfobacterales	Desulfobacteraceae	unclassified		0.00167665	0.00151041		0.00158056	0.00106996		0.00110564	0.000293138	0.00105676	0.00298861		0.00159758	0.00121921	0.0017703	0.00119832		0.00170954	0.00176906	0.00182733	0.00122899		0.00229385	0.000881096	0.00109223	0.00104966		0.00134395	0.00237894	0.000872776	0.00124259		0.00188871	0.000687323	0.00065854	0.000382768		0.000985519	0.00156582	0.00125542	0.00122382		0.00210406
Otu0008516	Bacteria	Proteobacteria	Deltaproteobacteria	Desulfobacterales	Desulfobacteraceae	Desulforegula		0.000445372	0.000771043		0.000570893	0.00113289		0.00082394	0.00141496	0.000773862	0.000980303		0.000380817	0	0	0		0.000309427	0	0.000910151	0.0015201		0.000267304	0.000920644	0	0.000492426		0	0.00525299	0.0058717	0.0067059		0.000397573	0.00161547	0.00065854	0		0	0.00345415	0.00352109	0.00488871		0.001886
Otu0008518	Bacteria	Proteobacteria	Deltaproteobacteria	Syntrophobacterales	Syntrophobacteraceae	Syntrophobacter		0.000229333	0.000423204		0.000798613	0.00135978		0.000536514	0	0.000353298	0.000511862		0.000380817	0.000680433	0.00030806	0		0	0	0	0.000291108		0	0	0.000385802	0.000842313		0	0.000350914	0.00199973	0.000655642		0	0	0.000719956	0.00245021		0.000985519	0.00216399	0.0015837	0.00115363		0.00220893
Otu0008529	Bacteria	Proteobacteria	Deltaproteobacteria	Syntrophobacterales	Syntrophobacteraceae	Syntrophobacter		0.000420019	0.000829461		0.000934841	0.000815672		0.000785601	0	0.000386931	0.000796635		0	0.000262945	0.000416105	0		0.000894475	0	0.000286261	0.000564742		0	0.000628566	0.00136464	0		0.000616028	0.00222404	0.000569602	0.00131128		0.00149113	0.00116073	0.00862244	0.0011483		0.00103878	0.00212797	0.00087577	0.00115363		0.000593426
Otu0008630	Bacteria	Proteobacteria	Deltaproteobacteria	Desulfobacterales	Desulfobacteraceae	unclassified		0.00103844	0.0011264		0.00256497	0.00151907		0.00246609	0.000960216	0.000193466	0		0.000786406	0.000346659	0.000677098	0		0.000309427	0.000474941	0.00119875	0.00131103		0.000591817	0.00099974	0.000409913	0.000760274		0.00270623	0.00199084	0.00199973	0.00205513		0.00250471	0.000386909	0	0.00111059		0.00165062	0.00319909	0.00212218	0.00295756		0.00339833
Otu0008648	Bacteria	Proteobacteria	Deltaproteobacteria	Syntrophobacterales	Syntrophaceae	Desulfobacca		0.000726603	0.000726491		0.00247774	0.00158989		0.00145124	0.000293138	0	0		0	0.000262945	0.00083221	0.000331866		0.000596052	0.000474941	0	0		0.000859121	0.000589018	0.00109223	0.00139524		0.00274964	0.000285858	0.000278677	0.00127694		0.00147086	0.000600828	0.000390686	0.00136862		0.00261676	0.000510125	0.000571839	0		0.0030737
Otu0008717	Bacteria	Proteobacteria	Deltaproteobacteria	Desulfobacterales	Desulfobacteraceae	unclassified		0.000917331	0.00102533		0.00123232	0.00115478		0.000581906	0.000586276	0.00109196	0.00102372		0.000380817	0.000346659	0.000369038	0.00184736		0.00057325	0.000988594	0.000286261	0.00189325		0.00213335	0.000587397	0.00100295	0.00168463		0.000385664	0.00119609	0.00224166	0.003639		0.00147086	0.000987737	0.0018306	0.000956852		0.000966143	0.00105512	0.00246847	0.00292853		0.0021066
Otu0008726	Bacteria	Proteobacteria	Deltaproteobacteria	Syntrophobacterales	Syntrophobacteraceae	unclassified		0.000875001	0.000912796		0.00158629	0.00115073		0.000549294	0.000293138	0.000386931	0.0013085		0.000299895	0.00193182	0.00104614	0.000331866		0.00144492	0.00144356	0.000912494	0.000864587		0.00120589	0.00133299	0	0.000984853		0.00195998	0.00124875	0.00112696	0.00127694		0.001173	0.00273063	0.00032927	0.00238362		0.00132532	0.00132791	0.00362116	0.00176278		0.00188685
Otu0008881	Bacteria	Proteobacteria	Deltaproteobacteria	Syntrophobacterales	Syntrophobacteraceae	unclassified		0.000359171	0.000587108		0.00279039	0.00192081		0.000274647	0.000293138	0	0		0.00059979	0	0	0		0.000562246	0.000208125	0	0		0	0.00029532	0.000296518	0		0.00161772	0.00126115	0.00140563	0.00255387		0.00302171	0.00275753	0.00184152	0.00272867		0.0034755	0.00214339	0.00304031	0.00256275		0.00304663
Otu0008922	Bacteria	Proteobacteria	Deltaproteobacteria	Desulfovibrionales	Desulfovibrionaceae	Desulfovibrio		0.000351585	0.000525152		0.000169414	0.000395668		0.000320039	0.0013201	0.00308241	0.00863192		0.0010863	0.00162381	0	0.000331866		0	0.000305527	0.000684631	0.000282371		0	0.00029532	0.000409913	0		0	0	0.000872776	0.00236262		0.000337857	0.000300414	0	0		0.0003398	0	0	0.00109002		0
Otu0009008	Bacteria	Proteobacteria	Deltaproteobacteria	Desulfobacterales	Desulfobacteraceae	Desulfobacterium		0.00107137	0.00128515		0.000895732	0.00111844		0.0017585	0.00161323	0.000705027	0.000984581		0.000761635	0.000525891	0.00184519	0.00186206		0.00176535	0	0.0021089	0.000746288		0	0.00029532	0.000771605	0		0.00141243	0.00142929	0.000392268	0		0.00155085	0.000901242	0	0		0	0.00190663	0.000285919	0.00295756		0.000619645
Otu0009016	Bacteria	Proteobacteria	Deltaproteobacteria	Syntrophobacterales	Syntrophobacteraceae	unclassified		0.00140549	0.00112501		0.000328265	0.000488421		0.00209132	0.000912786	0.000545194	0.000562414		0.0010863	0.00105178	0.00030806	0.000856107		0.0011701	0.0022107	0	0.000937886		0.00127423	0.000923886	0.000296518	0.000349886		0.000616028	0.000285858	0.00203733	0.00227386		0.000337857	0.00191588	0.00032927	0.000382768		0.000359176	0.000527848	0.000285919	0.000353662		0
Otu0009115	Bacteria	Proteobacteria	Deltaproteobacteria	Desulfovibrionales	Desulfovibrionaceae	Desulfovibrio		0.000176371	0.000417424		0.00024429	0.000620663		0	0.000293138	0.00176021	0.0141699		0.000705484	0	0.000369038	0		0	0.00083916	0.000572521	0		0	0.000881096	0	0		0	0.000285858	0.00163281	0.000840026		0	0	0	0		0.000679599	0	0	0.000799969		0.000297561
Otu0009143	Bacteria	Proteobacteria	Deltaproteobacteria	Syntrophobacterales	Syntrophaceae	Desulfobacca		0.000225007	0.000408253		0.00254663	0.00157604		0	0	0.000386931	0.000656388		0.000299895	0	0	0		0.000275621	0.000611055	0.000342316	0		0.000324513	0.000333247	0	0.00168463		0.00261941	0.000701828	0.000683193	0.00373518		0.002962	0.000782057	0.00157913	0.00178039		0.00299044	0.00185576	0.00173353	0.000643716		0.00161466
Otu0009154	Bacteria	Proteobacteria	Deltaproteobacteria	Syntrophobacterales	Syntrophaceae	Desulfobacca		0.000685655	0.000829997		0.00176885	0.00152038		0.000594686	0.000373939	0.000193466	0.00140247		0.00116722	0.000788836	0.000724165	0.000399441		0.000309427	0.000208125	0.00153638	0.00123773		0.000671285	0.00029532	0.000385802	0.00196971		0.00148075	0.000677032	0.00196134	0.00180947		0.00109356	0.00120411	0.0022322	0.00066981		0.00172325	0.00325053	0.00173353	0.00179735		0.00277783
Otu0009186	Bacteria	Proteobacteria	Deltaproteobacteria	Desulfobacterales	Desulfobacteraceae	unclassified		0.000376635	0.00062193		0.00180895	0.0009568		0.000914725	0	0	0.00138821		0	0.000262945	0.00030806	0.000331866		0	0.000208125	0.000914837	0.000864587		0.000591817	0	0	0		0.00157431	0.00158726	0.00249334	0.00548338		0.00220684	0.00164237	0.00184152	0.00152236		0.00191778	0.004511	0.00150798	0.00141465		0.00153685
Otu0009241	Bacteria	Proteobacteria	Deltaproteobacteria	Syntrophobacterales	Syntrophaceae	Desulfomonile		0.00142831	0.0015426		0.00025527	0.000465235		0.000549294	0.00162729	0.000351729	0.0014993		0.00114245	0.000333774	0.000416105	0.00106317		0.00210938	0.00110598	0.0012011	0.00143807		0.00191213	0.00117642	0.00111634	0.00158105		0.000385664	0.000338516	0.000392268	0.000962579		0.000337857	0.000300414	0.0011161	0		0	0.00103797	0.000285919	0.000736361		0.000297561
Otu0009299	Bacteria	Proteobacteria	Deltaproteobacteria	Desulfobacterales	Desulfobacteraceae	unclassified		0.000142823	0.000334948		0.00235426	0.00126835		0.000261867	0.000326509	0.000353298	0		0	0	0	0.000798882		0.000309427	0	0	0		0	0.00029532	0	0		0.0028247	0.00315906	0.00198748	0.00198643		0.00149113	0	0	0		0.00356353	0.00181973	0.00278775	0.00102642		0.0015377
Otu0009384	Bacteria	Proteobacteria	Deltaproteobacteria	Desulfobacterales	Desulfobacteraceae	unclassified		0.000325377	0.000485617		0.00358346	0.0018503		0	0	0	0.000555283		0.000380817	0	0.00030806	0		0.000585048	0.000208125	0.000570178	0		0.000335643	0.000626945	0	0		0.00341582	0.00257495	0.00375838	0.00211696		0.00427398	0.00116897	0.000725416	0		0.00233021	0.00183688	0.00183626	0.00093377		0.00431384
Otu0009442	Bacteria	Proteobacteria	Deltaproteobacteria	Syntrophobacterales	Syntrophobacteraceae	unclassified		0.00103477	0.000951235		0.000554034	0.000761182		0.00122198	0	0.00073866	0.00102372		0.000786406	0.000333774	0.00129322	0		0.0011921	0.00150225	0.000684631	0.000564742		0.000938589	0.00117966	0.00068232	0.00111016		0.000958284	0.000571716	0.00153147	0.00243132		0	0.00162371	0.00065854	0.00146435		0.0003398	0.00136163	0.00119504	0.00138008		0.000918053
Otu0009459	Bacteria	Proteobacteria	Deltaproteobacteria	Desulfovibrionales	Desulfovibrionaceae	Desulfovibrio		0.000687361	0.000964332		0.000411069	0.000637688		0	0.00169404	0.00073866	0.00237992		0.000980607	0.000525891	0.000677098	0.00316014		0.00150153	0.00224941	0.000851752	0.00201155		0.000267304	0.00154921	0.00159143	0.00117066		0.00072792	0.00068943	0.00219017	0.00118131		0	0	0.00117206	0.00066981		0	0.000272786	0.000294925	0		0.000916358
Otu0009525	Bacteria	Proteobacteria	Deltaproteobacteria	Desulfobacterales	Desulfobacteraceae	unclassified		0.000450329	0.000766626		0.00219656	0.00138839		0	0.00162729	0.000193466	0.000832924		0.00149189	0.000667548	0.00030806	0.000798882		0.000309427	0.000780469	0.00188339	0.00152884		0	0.00155245	0.00138875	0.000699773		0.00200338	0.000701828	0.00106321	0.000996927		0.00141114	0.000481643	0.000792293	0.00146435		0.00229634	0.00185576	0.00207081	0.00193115		0.00307539
Otu0009547	Bacteria	Proteobacteria	Deltaproteobacteria	Desulfobacterales	Desulfobacteraceae	unclassified		0.000219642	0.0004002		0.00227842	0.00174578		0	0.00141496	0	0.000511862		0	0.000609604	0.000369038	0.000399441		0.000275621	0.000474941	0.000286261	0.000573479		0.000602947	0.000293699	0.000409913	0.000492426		0.00212185	0.00165232	0.00083603	0.00467083		0.002346	0.00120166	0.000725416	0.000382768		0.00221883	0.00418446	0.00184527	0.00675625		0.00242699
Otu0009612	Bacteria	Proteobacteria	Deltaproteobacteria	Desulfobacterales	Desulfobacteraceae	unclassified		0.00101035	0.00102503		0.000885309	0.000710307		0.00134767	0.000619648	0.00144526	0		0.00059979	0.000333774	0.00157029	0.000399441		0.00144492	0.000683066	0	0.000655515		0.000649026	0.00162831	0.00232197	0.0012527		0.000933207	0.000350914	0.00253094	0.00133821		0.000397573	0.00146114	0	0.00247063		0.000698976	0.000799484	0.00197235	0		0.00151148
Otu0009626	Bacteria	Proteobacteria	Deltaproteobacteria	Desulfobacterales	Desulfobacteraceae	Desulfatiferula		0.00038702	0.000864497		0.00185523	0.0013337		0.000274647	0.000293138	0.000546764	0		0.000299895	0	0	0		0	0.00081918	0.00102695	0		0.000973539	0.000333247	0.000296518	0		0.0017796	0.00481138	0.00191149	0.000716919		0.00256442	0.00162371	0.000786832	0.000698814		0.00159249	0.00320081	0.00150798	0.00218663		0.00148441
Otu0009729	Bacteria	Proteobacteria	Deltaproteobacteria	Desulfobacterales	Desulfobacteraceae	unclassified		0.00134491	0.00155549		0.000535732	0.00074931		0.000856553	0.000293138	0.00199045	0.00159327		0.00195363	0.00087255	0.000416105	0.000399441		0.000275621	0.00165168	0.000628576	0.00266706		0.00229385	0.00029532	0.000889553	0.000699773		0.000771328	0.00068943	0.000569602	0.00202078		0.000715709	0	0.000390686	0.000382768		0.000359176	0.000782336	0.000632212	0.00128743		0.000296713
Otu0009775	Bacteria	Proteobacteria	Deltaproteobacteria	Desulfobacterales	Desulfobacteraceae	unclassified		6.89052e-05	0.000238695		0.0012692	0.00156632		0	0.000293138	0	0		0	0	0	0		0.000275621	0	0.000286261	0.000291108		0	0.000293699	0.000409913	0.000349886		0.00136902	0.00310641	0.00222941	0.00118131		0.00109356	0.00191588	0.000390686	0.000382768		0.00172325	0.000510125	0.00115268	0.00186754		0.000890987
Otu0009788	Bacteria	Proteobacteria	Deltaproteobacteria	Desulfobacterales	Desulfobacteraceae	unclassified		0.000880698	0.00110518		0.000989546	0.000949474		0.00209132	0.000667078	0	0.000605835		0.000786406	0	0.000416105	0		0.000309427	0.000741758	0.00199784	0.00198402		0.000335643	0.000626945	0.00106812	0.00160259		0.000933207	0.000285858	0.000569602	0.000716919		0.000795146	0.000600828	0.00104923	0		0.000718352	0.000544997	0.000623206	0.00124628		0.00151148
Otu0009827	Bacteria	Proteobacteria	Deltaproteobacteria	Desulfobacterales	Desulfobacteraceae	Desulfatiferula		0.000137567	0.000321288		0.000235856	0.000594184		0.000274647	0.000912786	0	0.000934029		0	0	0	0		0.000275621	0.000949883	0	0.000746288		0	0	0	0.000410388		0	0.00386089	0.00686057	0.0127562		0	0	0	0		0	0.000782336	0.000580845	0.00339728		0.000943424
Otu0009835	Bacteria	Proteobacteria	Deltaproteobacteria	Desulfobacterales	Desulfobacteraceae	unclassified		0.000710703	0.000766215		0.000575914	0.00082007		0.000869333	0.000326509	0.00144369	0		0.000299895	0.00119344	0.00104614	0.000399441		0.000871673	0.000949883	0.00154341	0.00123773		0.000801912	0.000293699	0.000889553	0		0.000385664	0.00120849	0	0.00186388		0.000735431	0.00084165	0.000396146	0.000698814		0.000859631	0.00209309	0.000571839	0.000446307		0.000322932
Otu0009846	Bacteria	Proteobacteria	Deltaproteobacteria	Syntrophobacterales	Syntrophobacterales_unclassified	unclassified		0.000768876	0.000511953		0.00127737	0.000903531		0.000320039	0	0.000353298	0.000702662		0.000680712	0.000596719	0.00030806	0.00106317		0.00114729	0.000513653	0.000912494	0.0010374		0.00092746	0.000882717	0.000978838	0.000349886		0.00134395	0.000350914	0.000670944	0.000682571		0.00218657	0.000300414	0.000781372	0.00111059		0.000985519	0	0.000571839	0.000446307		0.000593426
Otu0009874	Bacteria	Proteobacteria	Deltaproteobacteria	Syntrophobacterales	Syntrophobacteraceae	unclassified		0.000161267	0.000377013		0.0012607	0.00118117		0	0	0	0.00145302		0	0	0.000724165	0.000399441		0.000309427	0	0.000286261	0.000291108		0.000335643	0.00029532	0.000385802	0		0.00241412	0.00130141	0.000392268	0.000996927		0.00145114	0.000773817	0.00104923	0.000574084		0.000286544	0.00160069	0.00120405	0.000446307		0.000890987
Otu0009900	Bacteria	Proteobacteria	Deltaproteobacteria	Desulfobacterales	Desulfobacteraceae	unclassified		0.00045962	0.000602402		0.00168636	0.00102441		0.000581906	0.000293138	0.000351729	0		0.000380817	0	0	0.000399441		0.000551242	0.000208125	0.000286261	0.000573479		0.000324513	0	0	0.000349886		0.00100169	0.00287321	0.00316428	0.00613902		0.00186899	0.00208887	0.000786832	0.000794539		0.00231084	0.00214512	0.00151699	0.00122382		0.00156392
Otu0009957	Bacteria	Proteobacteria	Deltaproteobacteria	Desulfobacterales	Desulfobacteraceae	unclassified		0.000132293	0.000308989		0.0019834	0.00121463		0.000261867	0.000326509	0	0.000234221		0	0	0	0		0	0	0	0		0.000267304	0	0	0		0.0028432	0.0013262	0.0029616	0.00333207		0.00111328	0.00146938	0	0.00108158		0.00184515	0.00156467	0.00087577	0.00182638		0.00213197
Otu0009965	Bacteria	Proteobacteria	Deltaproteobacteria	Desulfobacterales	Desulfobacteraceae	unclassified		0.000806731	0.000932597		0.00090415	0.000844318		0.00114398	0.000293138	0.000193466	0		0	0.00100132	0	0		0.00143392	0.00212662	0.000626233	0		0.000649026	0	0.00159143	0.00188767		0.00072792	0.00165232	0.000392268	0		0.00105357	0	0.000725416	0.000698814		0.00064572	0.000272211	0.000960492	0.00115363		0.00118939
Otu0010004	Bacteria	Proteobacteria	Deltaproteobacteria	Desulfobacterales	Desulfobacterales_unclassified	unclassified		0.000648179	0.000902197		0.00162791	0.00241758		0.000523734	0	0	0.000555283		0.00111107	0	0	0		0.000286625	0	0.000342316	0		0.000671285	0.000666493	0	0		0.0024392	0.00256255	0.00282186	0		0.00109356	0.0013502	0	0		0.000718352	0.000272211	0.000674573	0.000290054		0.00226052
Otu0010016	Bacteria	Proteobacteria	Deltaproteobacteria	Desulfobacterales	Desulfobacteraceae	unclassified		0.000411774	0.000816995		0.00124307	0.00100219		0.000549294	0	0.000353298	0.000277641		0.000811178	0.00126427	0	0.000331866		0.000286625	0	0.000570178	0.000582216		0	0.000589018	0.000296518	0		0.00172961	0.00191032	0.00334162	0.00432899		0.000755704	0.00110937	0	0.000411772		0.000626343	0.00212854	0.00202845	0.00173374		0.00186063
Otu0010042	Bacteria	Proteobacteria	Deltaproteobacteria	Desulfovibrionales	Desulfovibrionaceae	unclassified		0.000337163	0.000508533		0.00015934	0.000373118		0	0.00423412	0.00285374	0.00646055		0.000786406	0.000609604	0.000369038	0		0.000562246	0.000877871	0.000342316	0.000655515		0	0.000628566	0.000385802	0.000349886		0	0.000636772	0.00096187	0.00514154		0	0	0.00105469	0.000411772		0.0003398	0.000545572	0.000623206	0.000736361		0.000297561
Otu0010069	Bacteria	Proteobacteria	Deltaproteobacteria	Desulfobacterales	Desulfobacteraceae	unclassified		0.000303332	0.000709719		0.00203776	0.00146052		0.000640078	0.000293138	0	0		0	0.000262945	0	0		0.00057325	0.000266816	0.000912494	0.000746288		0	0	0.000385802	0		0.00172961	0.00193818	0.00231601	0.000621294		0.00153058	0.000481643	0.00150679	0.000287042		0.00275804	0.00425593	0.00304031	0.000580109		0.00213282
Otu0010158	Bacteria	Proteobacteria	Deltaproteobacteria	Syntrophobacterales	Syntrophobacteraceae	Syntrophobacter		0.0012337	0.00105221		0.00139318	0.00199679		0.000843773	0.000326509	0.000193466	0.000562414		0.000786406	0.000859665	0.000677098	0.000331866		0.00206378	0.00125541	0.000342316	0.000582216		0.00124084	0.00029532	0	0.000492426		0.000342256	0.000910232	0.00096187	0.000375633		0.000337857	0.00140979	0.00065854	0.00220088		0.0010049	0.000544422	0.000337286	0.00128743		0.00388773
Otu0010181	Bacteria	Proteobacteria	Deltaproteobacteria	Desulfovibrionales	Desulfovibrionales_unclassified	unclassified		0.000924085	0.00126107		0.00043982	0.000697893		0.00109859	0.000747879	0.00410553	0.0022888		0.00114245	0.00087255	0.00030806	0.000798882		0.000585048	0.000208125	0	0.00123773		0.000870251	0.000626945	0.000978838	0		0	0.000285858	0.00115145	0.0071016		0.000397573	0	0	0.000382768		0.00103878	0.00078291	0	0		0.000322932
Otu0010222	Bacteria	Proteobacteria	Deltaproteobacteria	Syntrophobacterales	Syntrophobacteraceae	Syntrophobacter		0.00068991	0.00136606		0.001325	0.00253877		0.000320039	0	0.000193466	0.000234221		0.00152327	0.000525891	0	0.000923682		0	0.000208125	0.00125247	0.000873324		0.00091633	0	0	0		0.00111358	0	0.00174555	0		0.00270286	0.000300414	0	0.00220088		0	0.000800634	0.000632212	0.00162898		0.00148357
Otu0010299	Bacteria	Proteobacteria	Deltaproteobacteria	Desulfobacterales	Desulfobacteraceae	unclassified		0.00119528	0.00149324		0.0003074	0.000576646		0.00143846	0.00157986	0.000193466	0.00102372		0.00192886	0.000693318	0.00114027	0		0.0011465	0.000533632	0.00114036	0.000573479		0.000267304	0.00117966	0.00109223	0.000842313		0.000889799	0.00136646	0.000683193	0.000621294		0	0	0	0.000287042		0.0003398	0.000545572	0.000632212	0.000643716		0
Otu0010310	Bacteria	Proteobacteria	Deltaproteobacteria	Desulfobacterales	Desulfobacteraceae	unclassified		0.0012848	0.000896103		0.0016085	0.00171317		0.00117659	0.000667078	0.000546764	0.000511862		0.00168609	0.000262945	0	0.00177979		0.000871673	0.000721778	0.000856439	0.00095536		0.00140486	0.00125713	0.000409913	0.000492426		0.000547543	0.00126115	0.00134189	0.000341285		0.00107329	0.00180494	0.00144537	0.000574084		0.00179189	0.00105512	0.000337286	0.000870163		0.00302126
Otu0010379	Bacteria	Proteobacteria	Deltaproteobacteria	Desulfovibrionales	Desulfovibrionaceae	Desulfovibrio		0.000146018	0.00034175		0.00023815	0.000576026		0.000274647	0.00257345	0.00593615	0.00582984		0	0	0.0013542	0		0.000309427	0.00171703	0.00125247	0.00161088		0	0.00154921	0.000385802	0		0	0.00222404	0.002392	0.00127694		0	0	0	0.000411772		0.000359176	0.000510125	0.000632212	0.00102642		0.000593426
Otu0010435	Bacteria	Proteobacteria	Deltaproteobacteria	Desulfobacterales	Desulfobacteraceae	unclassified		0.000405901	0.000645047		0.00178533	0.00138631		0.000274647	0.000326509	0.000193466	0		0.000405589	0	0	0		0.000618854	0	0	0		0.000324513	0	0	0		0.000659436	0.00215898	0.00058185	0.00118131		0.00224629	0.0016833	0	0.0012729		0.00234959	0.0015481	0.00087577	0.000643716		0.001886
Otu0010474	Bacteria	Proteobacteria	Deltaproteobacteria	Desulfobacterales	Desulfobacteraceae	unclassified		0.000229929	0.000417795		0.00137442	0.000929475		0.000274647	0	0.000386931	0.00103086		0	0.000346659	0	0		0.000309427	0.000266816	0.000342316	0		0.000335643	0.000293699	0	0		0.000771328	0.00092263	0.00246884	0.00364642		0.00188871	0.00138289	0.00032927	0.00066981		0.00132532	0.00156467	0.0025622	0		0.00151233
Otu0010488	Bacteria	Proteobacteria	Deltaproteobacteria	Desulfobacterales	Desulfobulbaceae	Desulfocapsa		0.000927897	0.000963905		0.000614162	0.000728747		0	0.00172741	0.00151252	0.00445162		0.00130527	0.00119344	0.00030806	0.000331866		0.00146772	0.000832501	0.00159712	0.00227513		0.000938589	0.00059064	0.000889553	0.00174513		0.000273772	0.00104034	0	0.00112003		0.000675714	0.000300414	0.000390686	0.000823543		0.000912887	0.00136278	0.000285919	0.000997378		0.000594274
Otu0010495	Bacteria	Proteobacteria	Deltaproteobacteria	Syntrophobacterales	Syntrophobacteraceae	unclassified		0	0		0.000572509	0.000642187		0	0.00130604	0	0.000328194		0	0	0	0		0	0	0.000283917	0		0	0	0	0		0.000273772	0.0114042	0.00124055	0.00174819		0.000775425	0.000240822	0.00117752	0.000287042		0.00064572	0.00129303	0.00146562	0.00102642		0.000595121
Otu0010501	Bacteria	Proteobacteria	Deltaproteobacteria	Syntrophobacterales	Syntrophobacteraceae	Syntrophobacter		0.000572238	0.00100183		0.00142079	0.00123698		0.000960117	0.000293138	0.000703457	0		0.00106153	0.000346659	0.000677098	0.000856107		0	0	0.00119407	0		0.000267304	0.00059064	0.000593035	0.000820775		0.000958284	0.000350914	0.000290925	0.00165257		0.00228628	0.000722465	0.000390686	0.000287042		0.00184515	0.00214569	0.00149898	0.00122382		0.000593426
Otu0010508	Bacteria	Proteobacteria	Deltaproteobacteria	Desulfovibrionales	Desulfovibrionaceae	Desulfovibrio		6.54667e-05	0.000226783		0.000158643	0.000371443		0.000261867	0.000667078	0.00234061	0.00320857		0	0.000859665	0	0.000399441		0	0.00100857	0.000572521	0.000864587		0	0	0	0		0	0	0.00257019	0.00205513		0.000337857	0	0.000725416	0.000382768		0	0.000255062	0.00121306	0.000290054		0.000296713
Otu0010567	Bacteria	Proteobacteria	Deltaproteobacteria	Desulfobacterales	Desulfobacteraceae	Desulfatiferula		0.000808125	0.000978354		0.00220353	0.00130699		0.00141863	0.000667078	0.00182905	0.000555283		0.00059979	0.000680433	0.00030806	0		0.000286625	0.00148893	0.000283917	0.000946623		0.00092746	0	0.000706431	0.0012527		0.00161772	0.00292586	0.00316428	0.00102386		0.00335957	0.000240822	0.00032927	0		0.00195166	0.00209195	0.00245947	0.00292853		0.00188515
Otu0010605	Bacteria	Proteobacteria	Deltaproteobacteria	Syntrophobacterales	Syntrophobacteraceae	unclassified		0.000600613	0.000568195		0.000404659	0.00050255		0.00111842	0.000586276	0.000546764	0.000980303		0.000405589	0.0015401	0.00030806	0		0.000286625	0.00104063	0.00147799	0.000373144		0.000591817	0	0	0		0.000342256	0.00137886	0.00096187	0.00290258		0	0.00128815	0.000390686	0.000956852		0.000359176	0.00078291	0.00175154	0.000290054		0.000917205
Otu0010709	Bacteria	Proteobacteria	Deltaproteobacteria	Syntrophobacterales	Syntrophobacteraceae	Syntrophobacter		0.000358357	0.000567685		0.000517344	0.000965292		0.000811161	0.000667078	0.000580397	0.000234221		0	0.000930493	0.000369038	0.000331866		0.000286625	0.000474941	0.000283917	0.000291108		0.000335643	0.000626945	0.000296518	0.000410388		0	0	0.00083603	0		0.000397573	0.000687323	0.000396146	0		0.00107753	0.000527848	0.000632212	0		0.000594274
Otu0010710	Bacteria	Proteobacteria	Deltaproteobacteria	Desulfobacterales	Desulfobacteraceae	unclassified		0	0		0.00107611	0.000968903		0	0	0.000351729	0		0	0	0	0		0	0	0	0		0	0.000293699	0	0		0.000958284	0.00218378	0.00210107	0.00150253		0.00145114	0.00195102	0.000786832	0.000985856		0.0010049	0.00207537	0.00177589	0.00211644		0.000890139
Otu0010719	Bacteria	Proteobacteria	Deltaproteobacteria	Desulfobacterales	Desulfobulbaceae	Desulfocapsa		0.000533662	0.000729245		0.00033867	0.000502947		0	0.00304225	0.00125022	0.000511862		0	0.000525891	0.000985158	0.00119832		0.000882677	0.000721778	0.00114504	0.00292191		0.00125197	0.00125551	0	0.000410388		0.000342256	0.00287321	0.000974118	0.000341285		0.000715709	0.00128815	0	0		0	0.000800634	0	0.000353662		0.000296713
Otu0010826	Bacteria	Proteobacteria	Deltaproteobacteria	Syntrophobacterales	Syntrophobacteraceae	unclassified		0.00120973	0.00149133		0.000416112	0.000678707		0.00298983	0	0.00125179	0.000702662		0.000405589	0.000680433	0.00120125	0		0.00057325	0.000624376	0.00182264	0.00122899		0.000870251	0.000333247	0.000409913	0.000902814		0.00107018	0.000285858	0.000392268	0.000280009		0	0.000782057	0	0.00117731		0	0.00078291	0.000294925	0.00093377		0.000594274
Otu0010846	Bacteria	Proteobacteria	Deltaproteobacteria	Syntrophobacterales	Syntrophaceae	Desulfobacca		0.000373759	0.000470443		0.000390286	0.000781605		0.000261867	0.000373939	0.000545194	0.000328194		0.000380817	0	0.00030806	0.000524241		0.000585048	0.00041625	0.000856439	0.000564742		0.000267304	0.000626945	0.000385802	0.000410388		0.00116357	0.00127354	0.00125279	0.00214389		0.000397573	0.000386909	0.000396146	0.00117731		0	0.000255062	0.00154134	0.000997378		0
Otu0010866	Bacteria	Proteobacteria	Deltaproteobacteria	Desulfobacterales	Desulfobacteraceae	Desulfobacterium		0.001284	0.000957599		0.000818068	0.000942271		0.00136751	0.000993587	0.00073866	0.000890608		0.00146712	0.00101421	0.00150931	0.00132312		0.00170954	0.000780469	0.000628576	0.000291108		0.000591817	0.00217616	0	0.000984853		0.00154923	0.000624374	0.000290925	0.000375633		0.000397573	0.00120166	0.00105469	0		0.000679599	0.00107227	0.000285919	0.000580109		0.000645863
Otu0010913	Bacteria	Proteobacteria	Deltaproteobacteria	Syntrophobacterales	Syntrophobacteraceae	Desulfovirga		0.00020279	0.000508044		0.000628728	0.000607918		0.000811161	0.000946157	0.000353298	0.000984581		0	0.000525891	0	0.000923682		0	0.00122211	0.000342316	0.000282371		0	0.00029532	0.000385802	0		0.000616028	0.00124875	0.00124055	0.000560017		0.000397573	0.000868552	0.000390686	0.000765536		0.000286544	0.00078291	0.000969498	0.00215101		0.00121477
Otu0010921	Bacteria	Proteobacteria	Deltaproteobacteria	Desulfobacterales	Desulfobacteraceae	unclassified		0.000528984	0.000477288		0.00139221	0.00122891		0.000856553	0.000619648	0.00073866	0.00125794		0.000380817	0.000262945	0.000369038	0.000923682		0.000275621	0.00173035	0.00102695	0.000582216		0.000602947	0.000587397	0	0.000492426		0.000273772	0.000636772	0.00112696	0.0016795		0.000775425	0.000928144	0.000725416	0.000287042		0.00295656	0.000799484	0.00124641	0.00093377		0.00156307
Otu0010947	Bacteria	Proteobacteria	Deltaproteobacteria	Desulfobacterales	Desulfobacteraceae	unclassified		0.000586928	0.000690846		0.000728368	0.000624753		0.000901945	0.000293138	0.00109353	0		0.000299895	0.000596719	0	0		0.000275621	0.000305527	0.000286261	0.000746288		0.000870251	0.000587397	0.00127536	0		0.000616028	0.000624374	0.00115145	0.00373463		0.000377852	0.000773817	0.000396146	0.000287042		0.00132532	0.00132791	0.000857758	0.000799969		0.000594274
Otu0010991	Bacteria	Proteobacteria	Deltaproteobacteria	Desulfobacterales	Desulfobacteraceae	unclassified		0.00113565	0.00116816		0.00135365	0.00156105		0.000811161	0	0.00160352	0.000511862		0.00100538	0.000333774	0.000369038	0.000798882		0.000848871	0.000780469	0.000626233	0.000946623		0.00187718	0	0.00161554	0.000492426		0	0.00092263	0.0024051	0.000375633		0.001173	0.000901242	0	0.000382768		0.00233021	0.00105512	0.000337286	0.000799969		0.00191137
Otu0011064	Bacteria	Proteobacteria	Deltaproteobacteria	Syntrophobacterales	Syntrophobacteraceae	Syntrophobacter		0.00200378	0.00172555		0.00155434	0.00126788		0.0017585	0.000960216	0.000546764	0.000656388		0.00380915	0	0.00175639	0.000798882		0.000859875	0.000572343	0.000970892	0.00131977		0.00158761	0.00117804	0.00157187	0.00199144		0.00207187	0.00124875	0.00203648	0.00155694		0.00153113	0.000600828	0.000786832	0.00108158		0.00107753	0.0029286	0.00115268	0.00109002		0.00153685
Otu0011128	Bacteria	Proteobacteria	Deltaproteobacteria	Syntrophobacterales	Syntrophobacteraceae	unclassified		0.000723179	0.000839669		0.000514381	0.000736		0.000549294	0	0.000386931	0.000840056		0.00116722	0.00120632	0.000416105	0		0.00057325	0.00125541	0.000854096	0.00131977		0.000602947	0.000922265	0.000385802	0.00104966		0.0010451	0.000910232	0.00107546	0.000840026		0.000715709	0.00146938	0.00098781	0.0024212		0	0.000817783	0.00114368	0.00138008		0.000296713
Otu0011166	Bacteria	Proteobacteria	Deltaproteobacteria	Syntrophobacterales	Syntrophobacteraceae	Syntrophobacter		0.00110338	0.000606149		0.000712145	0.00102649		0.000856553	0	0.000193466	0.00102372		0.00146712	0.000333774	0	0.00118797		0.000837867	0.000741758	0.00188104	0.000573479		0.00125197	0.000293699	0.000409913	0.0011922		0.000385664	0	0.000392268	0.000280009		0.000795146	0	0.00118298	0.000287042		0.000698976	0.00132791	0.00177589	0.000870163		0.000968795
Otu0011191	Bacteria	Proteobacteria	Deltaproteobacteria	Desulfovibrionales	Desulfovibrionaceae	Desulfovibrio		0.00102415	0.00139672		0.000480964	0.000507224		0.00164788	0.00128672	0.00131906	0.00333883		0.000680712	0	0.00103223	0.00153019		0.00057325	0.000266816	0.00210422	0.0010374		0.00119476	0.000293699	0	0.000349886		0.000342256	0.00158726	0.00204958	0.000280009		0.000377852	0.000722465	0.00032927	0		0.000286544	0.000272211	0	0.000290054		0.000917205
Otu0011227	Bacteria	Proteobacteria	Deltaproteobacteria	Desulfovibrionales	Desulfovibrionaceae	Desulfovibrio		0.000351705	0.000560345		0.000255494	0.000467639		0.0011312	0.00136753	0.00375537	0.00438395		0	0.000609604	0.000785143	0.000856107		0.000275621	0.000572343	0.00211125	0.000664252		0	0.000666493	0.000409913	0.000410388		0	0.000975288	0.00211332	0.00249204		0.000735431	0.000240822	0	0		0.000286544	0.000782336	0.000294925	0.000353662		0
Otu0011397	Bacteria	Proteobacteria	Deltaproteobacteria	Desulfobacterales	Desulfobacteraceae	unclassified		0.00107056	0.00110131		0.000787752	0.000992026		0.000549294	0	0.000386931	0.000746082		0.0013862	0.000333774	0.00061612	0.000923682		0.00169774	0	0.000342316	0.000946623		0.000649026	0.000628566	0	0.000349886		0.000273772	0.000350914	0.00154372	0.000375633		0.000337857	0	0.00157913	0.00105258		0.000679599	0	0.000960492	0.00153633		0.00185978
Otu0011556	Bacteria	Proteobacteria	Deltaproteobacteria	Desulfobacterales	Desulfobacteraceae	unclassified		0.000355911	0.000593195		0.00154688	0.00117859		0.000261867	0	0.000546764	0.000562414		0	0	0.00030806	0.000399441		0.000894475	0.00104729	0.000286261	0.00085585		0.000267304	0	0	0.000410388		0.00102677	0.00386089	0.00340536	0.00139949		0.00224629	0.00183184	0.00235504	0		0.00197104	0.00163671	0.00264265	0.000997378		0.000943424
Otu0011601	Bacteria	Proteobacteria	Deltaproteobacteria	Desulfobacterales	Desulfobacteraceae	Desulforegula		0.000158884	0.000371778		8.49499e-05	0.000294275		0	0.00242786	0.00292728	0.00503035		0.000299895	0.000525891	0	0		0	0.000683066	0	0.000373144		0.000335643	0.000333247	0	0		0	0.0106724	0.00386058	0.00654845		0	0.000928144	0	0.000382768		0.0003398	0.000544997	0.000294925	0		0
Otu0011668	Bacteria	Proteobacteria	Deltaproteobacteria	Desulfobacterales	Desulfobacteraceae	unclassified		0.000274451	0.000723476		0.0013047	0.00126696		0	0	0.000193466	0.000555283		0.000811178	0	0.000785143	0		0.000286625	0	0.000567835	0.000291108		0	0	0.000296518	0.000902814		0.000821315	0.00231695	0.00096187	0.000716919		0.00115328	0.000541236	0.00151225	0.000382768		0.00200492	0.000800059	0.000969498	0.00131647		0.00123929
Otu0011686	Bacteria	Proteobacteria	Deltaproteobacteria	Syntrophobacterales	Syntrophobacterales_unclassified	unclassified		0.00116835	0.00117109		0.00135399	0.00111627		0.00122198	0.00107439	0.000386931	0.00149644		0.00157281	0.000930493	0.0010932	0.0023716		0.000871673	0.000988594	0.000858782	0.000664252		0.00100693	0.00206237	0.00120563	0.00172359		0.00197831	0.0026524	0.00115145	0.00212383		0.000715709	0.000868552	0	0.00158908		0.000912887	0.000510125	0.00188763	0.00231385		0.00180904
Otu0011699	Bacteria	Proteobacteria	Deltaproteobacteria	Desulfobacterales	Desulfobacteraceae	Desulfobacterium		0.000143879	0.000336387		0.00132117	0.00155567		0	0	0	0.000277641		0.000299895	0	0	0		0.000275621	0.000533632	0	0.000573479		0	0.000333247	0.00109223	0.000349886		0.000342256	0.000338516	0.00154372	0.000341285		0.002306	0.000987737	0.00118298	0.000574084		0.0013447	0.000818357	0.000960492	0.000353662		0.00129173
Otu0011738	Bacteria	Proteobacteria	Deltaproteobacteria	Desulfobacterales	Desulfobacteraceae	unclassified		0.000479395	0.000657985		0.00116781	0.00100858		0.000320039	0	0.000740229	0		0.000405589	0	0.000369038	0		0.000275621	0.000611055	0.000567835	0.000946623		0.00091633	0.000589018	0.00138875	0		0.00204679	0	0.00201198	0.000682571		0.000715709	0.00062773	0.00144537	0.0011483		0.000966143	0.000765187	0.00236574	0.000353662		0.000942576
Otu0011743	Bacteria	Proteobacteria	Deltaproteobacteria	Desulfobacterales	Desulfobacteraceae	unclassified		7.73567e-05	0.000267972		0.00233859	0.00154211		0	0	0	0		0	0.000346659	0.000724165	0		0.000309427	0.000208125	0.000286261	0.000282371		0	0	0	0		0.000684512	0.00161206	0.00269603	0.00136514		0.00304198	0.00116897	0.00111064	0.00105258		0.0029033	0.000527273	0.00174253	0.000736361		0.00272455
Otu0011765	Bacteria	Proteobacteria	Deltaproteobacteria	Syntrophobacterales	Syntrophobacteraceae	Syntrophobacter		0.000500328	0.000867416		0.000248785	0.000454616		0	0	0.000351729	0.000840056		0.000786406	0.000262945	0.00030806	0.000798882		0.00121491	0.00041625	0.000572521	0.0015201		0	0	0.000296518	0.000492426		0.000385664	0.000350914	0.0011392	0.00158387		0	0.00116897	0.000786832	0.000985856		0.000286544	0.00108884	0.000623206	0.000353662		0.000322932
Otu0011865	Bacteria	Proteobacteria	Deltaproteobacteria	Desulfobacterales	Desulfobacteraceae	unclassified		6.6826e-05	0.000231492		0.000536842	0.000761322		0	0.000700449	0	0.000984581		0	0	0.0013542	0.000524241		0	0	0	0		0.000267304	0.00029532	0.00227375	0		0	0.000350914	0.00202508	0.0010582		0.00151086	0.000687323	0.000792293	0.000382768		0.0003398	0.000800634	0.00189663	0.00138008		0.000296713
Otu0011921	Bacteria	Proteobacteria	Deltaproteobacteria	Desulfobacterales	Desulfobulbaceae	Desulfobulbus		0.000373129	0.00071963		0.00173716	0.00306403		0	0.00175883	0	0.000234221		0	0.000525891	0.000677098	0		0.000286625	0.00260947	0	0.00203776		0.00120589	0.00254895	0.00443866	0		0	0	0	0		0.00192815	0	0	0.000382768		0.00502049	0	0.000337286	0.000446307		0
Otu0011923	Bacteria	Proteobacteria	Deltaproteobacteria	Desulfobacterales	Desulfobacteraceae	unclassified		9.52043e-05	0.000329797		0.000873962	0.000841965		0	0.000293138	0.000353298	0.000277641		0.000380817	0.000333774	0	0		0	0	0	0.000373144		0	0.00029532	0.000409913	0		0.00134395	0.000975288	0.000557353	0.00359201		0.000337857	0.00116897	0.000390686	0.000382768		0.000626343	0.00132848	0.000674573	0.00191903		0.0011877
Otu0011955	Bacteria	Proteobacteria	Deltaproteobacteria	Desulfobacterales	Desulfobacteraceae	Desulfobacterium		0.000587381	0.00086615		0.000574956	0.000911463		0.000274647	0.000653019	0.000193466	0.000328194		0	0.000667548	0	0		0.00113629	0.000611055	0.000283917	0.000582216		0.000938589	0.00059064	0.000706431	0.000492426		0.000616028	0.0017802	0.000949621	0.000280009		0.000377852	0.00283578	0.00032927	0.000698814		0.00130594	0.00214626	0.000866764	0.000892614		0
Otu0012058	Bacteria	Proteobacteria	Deltaproteobacteria	Desulfobacterales	Desulfobacteraceae	unclassified		0.000453836	0.00101796		0.000458913	0.000748704		0	0.000373939	0.000580397	0.000234221		0.00154804	0.000596719	0.000416105	0		0	0	0.00148033	0		0.000267304	0.000885959	0.00225419	0.000349886		0.000385664	0.000338516	0.000290925	0.00093565		0.00115328	0.000541236	0.00065854	0.00066981		0	0.00105512	0.00155034	0.000290054		0.000296713
Otu0012111	Bacteria	Proteobacteria	Deltaproteobacteria	Desulfobacterales	Desulfobacteraceae	unclassified		6.86617e-05	0.000237851		0.00107128	0.000863276		0.000274647	0.000293138	0	0.000511862		0	0.000333774	0	0		0	0	0.000342316	0.000282371		0	0.000626945	0	0.000410388		0.00189149	0.00184526	0.00154372	0.00284075		0.001173	0.000773817	0	0		0.000626343	0.00129303	0.00160171	0.00138008		0.000594274
Otu0012118	Bacteria	Proteobacteria	Deltaproteobacteria	Desulfobacterales	Desulfobulbaceae	Desulfocapsa		0.000759492	0.000810413		0.0005667	0.000651145		0.00108581	0.00102696	0.000193466	0.000234221		0.00100538	0	0.00030806	0.00119832		0.000286625	0.000474941	0	0		0.000660156	0	0.00111634	0.000410388		0	0.000975288	0.000278677	0		0.000337857	0.00102288	0.000390686	0		0.000985519	0.000544997	0.000285919	0.000446307		0.000943424
Otu0012134	Bacteria	Proteobacteria	Deltaproteobacteria	Desulfobacterales	Desulfobacteraceae	unclassified		0.000449662	0.000473546		0.000604945	0.000942156		0.000261867	0	0	0.000234221		0.000299895	0.000667548	0.00140126	0		0.000309427	0.00135281	0	0.00190198		0.00092746	0.00180336	0.000771605	0.000842313		0.000821315	0.0013262	0.000278677	0.00423337		0	0.00062773	0.00032927	0		0.000359176	0.0015481	0.00145661	0.00116022		0.00123929
Otu0012178	Bacteria	Proteobacteria	Deltaproteobacteria	Desulfobacterales	Desulfobacteraceae	unclassified		0.000150737	0.000354748		0.000744888	0.000780115		0	0	0	0.000468441		0	0	0	0		0	0.000208125	0.000286261	0		0.000602947	0	0.000385802	0.000410388		0	0.00208069	0.00135414	0.00124259		0.000377852	0.000600828	0.000396146	0		0.0016845	0.00207595	0.0024081	0.00398398		0.000917205
Otu0012240	Bacteria	Proteobacteria	Deltaproteobacteria	Desulfobacterales	Desulfobacteraceae	unclassified		0.000178754	0.000421986		0.000357176	0.000529623		0	0	0	0.000656388		0.000405589	0	0	0		0.000309427	0	0	0.00102866		0	0.000587397	0.000409913	0.000492426		0.00072792	0.00104034	0.00458216	0.00575541		0.000377852	0.000600828	0.00032927	0.000698814		0	0.00105512	0.000580845	0.00389133		0.000322932
Otu0012243	Bacteria	Proteobacteria	Deltaproteobacteria	Desulfovibrionales	Desulfovibrionaceae	Desulfovibrio		6.86617e-05	0.000237851		9.6416e-05	0.000333995		0.000274647	0.000373939	0.00195996	0.00648622		0	0.000525891	0	0.000524241		0	0	0.000570178	0.000664252		0	0.00059064	0.000385802	0		0.000385664	0.000285858	0.00126504	0.00633027		0	0	0	0		0	0.000544997	0.000674573	0.000290054		0
Otu0012300	Bacteria	Proteobacteria	Deltaproteobacteria	Desulfobacterales	Desulfobacteraceae	Desulfobacterium		0.00163678	0.00107068		0.000499956	0.000683328		0.000536514	0.000960216	0.000546764	0		0.0023668	0	0	0.000663733		0.00172054	0.00152223	0.00148502	0		0.00192326	0.00125551	0.00100295	0.0013132		0.000659436	0.000636772	0.000670944	0.000375633		0.000337857	0.000687323	0.00032927	0.000411772		0.000679599	0.000272211	0.000571839	0.00164109		0.000322932
Otu0012460	Bacteria	Proteobacteria	Deltaproteobacteria	Desulfobacterales	Desulfobulbaceae	Desulfobulbus		0.000143635	0.000335849		0	0		0.000274647	0.00104102	0.000773862	0.000934029		0.000299895	0.000262945	0	0		0	0.000208125	0.000342316	0.000291108		0	0	0.000819827	0		0	0.00104034	0.00124055	0.00192516		0	0.00108247	0.00032927	0		0	0.00109114	0.00269402	0.000580109		0
Otu0012536	Bacteria	Proteobacteria	Deltaproteobacteria	Syntrophobacterales	Syntrophaceae	Desulfomonile		0.000465175	0.000632398		0.000323987	0.000484777		0.000536514	0.000946157	0	0.000234221		0.000380817	0.000333774	0	0.000524241		0.000618854	0.000266816	0.00154107	0.00085585		0.000324513	0.000333247	0	0.000699773		0.000659436	0.000338516	0	0.00223952		0	0	0	0.00066981		0.0003398	0.000272786	0.000857758	0		0.000296713
Otu0012600	Bacteria	Proteobacteria	Deltaproteobacteria	Syntrophobacterales	Syntrophobacteraceae	Syntrophobacter		0.000523239	0.000610307		0.000464943	0.000741314		0.000320039	0.00107439	0	0.000234221		0	0.000262945	0.00030806	0.000524241		0.0011811	0	0.000856439	0		0.000591817	0	0	0		0.000547543	0.000338516	0.000290925	0.00127694		0.000675714	0.000481643	0.00156274	0.00165567		0.0003398	0.000527273	0.000909125	0.00102642		0.000296713
Otu0012606	Bacteria	Proteobacteria	Deltaproteobacteria	Desulfobacterales	Desulfobacteraceae	unclassified		0	0		0.000523122	0.000754741		0	0.000667078	0.00195682	0.00121167		0	0	0.000369038	0		0	0.000533632	0.000286261	0.00116443		0	0.000922265	0	0.000349886		0.000273772	0.0036029	0.00316428	0.00585901		0.001173	0.000600828	0	0		0.00064572	0.00105455	0.00058985	0		0
Otu0012793	Bacteria	Proteobacteria	Deltaproteobacteria	Desulfobacterales	Desulfobacteraceae	unclassified		0.000699603	0.000683578		0.000869078	0.000660998		0.000320039	0.000326509	0	0.000277641		0.000380817	0	0.00030806	0.000798882		0.0011701	0.000624376	0.000570178	0.00178368		0.00092746	0	0.000593035	0.000760274		0.000385664	0	0.000683193	0.000751267		0.00151086	0.000240822	0.000786832	0.000287042		0.000985519	0.00160069	0.00101186	0.000892614		0.000594274
Otu0012850	Bacteria	Proteobacteria	Deltaproteobacteria	Desulfobacterales	Desulfobacteraceae	Desulfobacula		0.000483206	0.000775942		0.000917731	0.000796807		0.000261867	0.000667078	0.000353298	0.000934029		0.000380817	0	0.00115418	0		0.000618854	0.00102731	0.000854096	0		0.000671285	0.000961813	0.00136464	0.000760274		0.000659436	0.00240458	0.00136639	0.00124259		0.00109356	0.000386909	0.000792293	0.000382768		0.00127206	0.00241733	0.00182726	0.00116022		0.000645863
Otu0012871	Bacteria	Proteobacteria	Deltaproteobacteria	Desulfobacterales	Desulfobacteraceae	unclassified		0	0		0.00218561	0.00470332		0	0	0	0		0	0	0.000369038	0		0	0.000305527	0	0		0	0.000333247	0	0		0.00102677	0	0.00222941	0.000751267		0.00594388	0.00454047	0.00237177	0.0012729		0.000286544	0.00136106	0.000294925	0		0.00148526
Otu0012943	Bacteria	Proteobacteria	Deltaproteobacteria	Desulfobacterales	Desulfobacteraceae	unclassified		7.49738e-05	0.000259717		0.00333955	0.00194566		0	0	0.000353298	0		0.000299895	0	0	0		0	0	0	0		0	0	0.000409913	0		0.00259433	0.00124875	0.000670944	0.00093565		0.00558669	0.00189143	0.000725416	0.000382768		0.00336899	0.00132733	0.00251083	0.000580109		0.00180819
Otu0013012	Bacteria	Proteobacteria	Deltaproteobacteria	Syntrophobacterales	Syntrophobacteraceae	unclassified		0.00101456	0.000922674		0.000222747	0.000553573		0.00138029	0	0	0.000234221		0.000380817	0.000609604	0.00181737	0		0.00111349	0.000208125	0.000570178	0.000291108		0.00118363	0.000333247	0.000795716	0.000349886		0	0.000677032	0	0.000341285		0	0.00203752	0.000781372	0.000382768		0	0.000544997	0.000285919	0.00131647		0.000890987
Otu0013020	Bacteria	Proteobacteria	Deltaproteobacteria	Desulfobacterales	Desulfobacteraceae	Desulfobacterium		0.000625672	0.000890944		0.000802285	0.000970773		0.000549294	0.000619648	0.000351729	0.00106714		0.00168609	0.00162381	0.00120125	0.00151984		0	0.000305527	0.00125481	0.000373144		0.000267304	0.000333247	0.00147804	0.00123116		0	0.000677032	0.00083603	0		0.000775425	0.000240822	0.000396146	0		0.000573087	0.00107227	0.000918131	0.000643716		0.00186063
Otu0013052	Bacteria	Proteobacteria	Deltaproteobacteria	Desulfovibrionales	Desulfovibrionaceae	Desulfovibrio		0.000257461	0.000625291		8.07329e-05	0.000279667		0	0.000700449	0.000703457	0.00620145		0.000380817	0	0.000416105	0		0	0.000208125	0.000283917	0		0.000649026	0	0	0		0	0	0	0.00177512		0	0	0	0		0	0	0	0.000353662		0.000322932
Otu0013110	Bacteria	Proteobacteria	Deltaproteobacteria	Desulfobacterales	Desulfobulbaceae	Desulfocapsa		0.000454303	0.000733263		0	0		0.000594686	0.000619648	0.000740229	0.00252017		0	0.000859665	0.000677098	0.000524241		0.000551242	0.00123543	0.0012011	0.000664252		0.000671285	0.000884338	0.000296518	0.0012527		0	0.00166472	0.00223916	0.000716919		0	0.000901242	0.0011161	0		0	0.00107285	0.000580845	0.000290054		0
Otu0013239	Bacteria	Proteobacteria	Deltaproteobacteria	Desulfobacterales	Desulfobacteraceae	unclassified		0.000712327	0.000596592		0.000767684	0.000950548		0.000581906	0.000667078	0.000351729	0.000511862		0.0010863	0.00129004	0.00030806	0.000731307		0.0011811	0.000208125	0.00159712	0.000282371		0	0	0.000978838	0		0.000958284	0.000975288	0.000683193	0.000901302		0	0.00125546	0	0.000698814		0.000626343	0.0010557	0.00121306	0.000290054		0.00148611
Otu0013271	Bacteria	Proteobacteria	Deltaproteobacteria	Desulfobacterales	Desulfobacteraceae	unclassified		0.00036164	0.000537502		0.00154585	0.00147709		0	0.00107439	0.000545194	0.000277641		0.000786406	0	0	0.000331866		0	0	0.000286261	0		0.000660156	0.000293699	0.000296518	0.000349886		0.00209694	0.00286081	0.00124055	0.00262257		0.000675714	0.000782057	0.000792293	0		0.00189841	0.00132733	0.0015927	0.00141465		0.00151233
Otu0013342	Bacteria	Proteobacteria	Deltaproteobacteria	Desulfovibrionales	Desulfohalobiaceae	unclassified		0.000570378	0.000515128		0.000271612	0.000493307		0.000274647	0.000293138	0.00163715	0.00154272		0.0010863	0.000596719	0.000369038	0		0.000596052	0.00100857	0.000628576	0.000746288		0.000324513	0.000293699	0.00106812	0.000492426		0.000385664	0.000636772	0.000278677	0.00130386		0.000377852	0.000386909	0.00032927	0.00066981		0	0.000800634	0.000632212	0.000997378		0.000322932
Otu0013419	Bacteria	Proteobacteria	Deltaproteobacteria	Desulfobacterales	Desulfobacteraceae	unclassified		0.000458732	0.000622253		0.000887634	0.000911393		0	0.0013201	0.000545194	0.000234221		0.00100538	0.000680433	0	0.000923682		0.000562246	0.000891192	0.000856439	0.000282371		0.000267304	0.000628566	0.00216036	0.0012527		0.000659436	0.000910232	0.000569602	0.000280009		0.000397573	0.000300414	0	0.000411772		0.00189841	0.000510125	0.000623206	0.000353662		0.000595121
Otu0013488	Bacteria	Proteobacteria	Deltaproteobacteria	Desulfobacterales	Desulfobacteraceae	unclassified		0.000292201	0.000549356		0.00121015	0.00083591		0.000523734	0.000326509	0.000353298	0.000328194		0	0.000262945	0.000369038	0		0.000309427	0	0.000914837	0.000847113		0.000335643	0.000960192	0.000889553	0.00174513		0.00157431	0.000857574	0.000860527	0.00284075		0.00111328	0.000541236	0	0		0.000912887	0.000800059	0.000918131	0.00141465		0.00124014
Otu0013570	Bacteria	Proteobacteria	Deltaproteobacteria	Desulfobacterales	Desulfobacteraceae	unclassified		0.000391417	0.000491996		0.000487955	0.000940475		0.000581906	0.000747879	0.000193466	0.000984581		0.000380817	0	0	0		0	0.000266816	0.000570178	0.000291108		0.000602947	0.000626945	0	0.000492426		0.00159264	0.00161206	0.00163281	0.00161822		0	0.000541236	0.00032927	0.000698814		0.000359176	0.00214512	0.00182726	0.00173374		0
Otu0013614	Bacteria	Proteobacteria	Deltaproteobacteria	Desulfobacterales	Desulfobacteraceae	unclassified		0.000234993	0.000590383		0.00125094	0.000997214		0.000640078	0	0	0		0.000299895	0	0.000724165	0		0	0.000305527	0.000283917	0		0	0.00059064	0	0.000349886		0.00134395	0.000285858	0.000557353	0		0.000795146	0.000386909	0.0013785	0.000765536		0.0010049	0.00105512	0.00181825	0.000446307		0.00185978
Otu0013698	Bacteria	Proteobacteria	Deltaproteobacteria	Syntrophobacterales	Syntrophaceae	Desulfobacca		0	0		0.000948635	0.000843888		0	0	0.000193466	0.000468441		0	0	0.00061612	0.000399441		0	0	0.000283917	0		0	0.00029532	0.000385802	0		0.000889799	0.000636772	0.000557353	0.000280009		0.000397573	0	0.00151225	0.000794539		0.000698976	0.000544997	0.00153233	0.000997378		0.00180819
Otu0013718	Bacteria	Proteobacteria	Deltaproteobacteria	Desulfobacterales	Desulfobacteraceae	unclassified		0.000497738	0.000677894		0.000736323	0.00103672		0.000856553	0.00104102	0.000706596	0		0.00059979	0.000333774	0	0		0	0	0.00114036	0.000373144		0.000534608	0.000920644	0	0		0.00100169	0.00327678	0.00332937	0.00124259		0.000397573	0.000687323	0	0.000287042		0.000359176	0.00238303	0.000623206	0.000290054		0.00118685
Otu0013948	Bacteria	Proteobacteria	Deltaproteobacteria	Desulfobacterales	Desulfobacteraceae	unclassified		0.00128819	0.00123094		0.00216591	0.00174248		0.000536514	0	0	0.000277641		0.00181656	0.000346659	0	0		0.00149053	0.000305527	0.000628576	0		0.00130918	0.000587397	0	0.000984853		0.00120698	0.001547	0.00198748	0.000375633		0.00190843	0.00062773	0.00118844	0		0.00306794	0.00265581	0.000571839	0.000290054		0.00248027
Otu0014039	Bacteria	Proteobacteria	Deltaproteobacteria	Desulfobacterales	Desulfobulbaceae	unclassified		0.00141313	0.00111487		0.000435603	0.000680914		0.00140585	0.00190637	0.00160352	0.00173066		0.00146712	0.000596719	0.00061612	0.00132312		0.000275621	0.000721778	0.00153638	0		0.00250395	0.000293699	0.00152626	0.000820775		0	0.00137886	0.00125279	0.00161822		0.000397573	0	0.000390686	0		0.000698976	0.00107227	0.000927137	0.000290054		0.000645863
Otu0014190	Bacteria	Proteobacteria	Deltaproteobacteria	Desulfobacterales	Desulfobacteraceae	unclassified		0.000157366	0.000367592		0.00148717	0.00172391		0.000320039	0.000373939	0	0		0	0.000262945	0.00030806	0		0.000309427	0	0	0		0	0.000333247	0	0		0.00102677	0.00234175	0.00115145	0.00417209		0.000337857	0.00146114	0.00032927	0.000382768		0.00207755	0.00210909	0.000918131	0.000997378		0.00250649
Otu0014191	Bacteria	Proteobacteria	Deltaproteobacteria	Desulfobacterales	Desulfobacteraceae	unclassified		6.54667e-05	0.000226783		0.00142076	0.00169186		0.000261867	0	0	0		0	0	0	0		0	0	0	0.000282371		0	0.00029532	0	0		0.000616028	0.00127354	0.00219017	0.00103128		0.00260386	0.00165061	0.000719956	0		0.00216557	0.00236416	0.00182726	0.000643716		0.000297561
Otu0014192	Bacteria	Proteobacteria	Deltaproteobacteria	Desulfobacterales	Desulfobacteraceae	unclassified		0.000143879	0.000336387		0.00130854	0.00130446		0	0	0	0		0.000299895	0	0.000369038	0.000331866		0.000275621	0.000305527	0.000283917	0.00085585		0	0	0	0		0.00107018	0.00227669	0.000872776	0.000621294		0.00192815	0.000782057	0.00105469	0		0.000698976	0.00156582	0.00155034	0.00093377		0.00153685
Otu0014395	Bacteria	Proteobacteria	Deltaproteobacteria	Syntrophobacterales	Syntrophaceae	Desulfobacca		0.000510059	0.00067178		0.00134223	0.000986017		0.000549294	0	0.000353298	0.000277641		0.000680712	0.000667548	0	0		0.000275621	0	0.000286261	0.000291108		0.000534608	0	0.000385802	0		0.000889799	0.00218378	0.00307519	0.00482031		0.00145114	0.000773817	0.000396146	0.000985856		0.000573087	0.00132848	0.000294925	0.00122382		0.0024549
Otu0014453	Bacteria	Proteobacteria	Deltaproteobacteria	Desulfobacterales	Desulfobacteraceae	unclassified		0.000895183	0.000846973		0.00105634	0.0010597		0.00139307	0.000326509	0.00109196	0.00102372		0.000380817	0.00121921	0.000677098	0		0.0012039	0.000266816	0.000684631	0.00198402		0.000602947	0.00059064	0.000296518	0.000760274		0.000273772	0.000571716	0.000860527	0.000655642		0.00111328	0.000541236	0.00151771	0.000287042		0.00165062	0.00156467	0.000337286	0.00124628		0.0011877
Otu0014487	Bacteria	Proteobacteria	Deltaproteobacteria	Desulfobacterales	Desulfobacteraceae	unclassified		8.39107e-05	0.000290675		0.000812832	0.00082213		0	0.000326509	0.000351729	0.000234221		0	0.000525891	0.000369038	0.000524241		0	0	0.000567835	0.000664252		0.000335643	0	0.000385802	0		0.000616028	0.00126115	0.00140563	0.00109255		0.000337857	0	0.000792293	0		0.00105815	0.00102025	0	0.00109002		0.00123929
Otu0014796	Bacteria	Proteobacteria	Deltaproteobacteria	Desulfobacterales	Desulfobacteraceae	unclassified		0.000680657	0.000695072		0.000703124	0.000953939		0.00117659	0.000293138	0	0		0.000705484	0.000667548	0.00141517	0.00177979		0.00057325	0.00041625	0.00188339	0		0.000267304	0.000628566	0.00154321	0		0.00072792	0.00068943	0.00096187	0.00133821		0.000397573	0.000240822	0.00118298	0		0.00136407	0.00107227	0.000623206	0.000870163		0.000322932
Otu0014812	Bacteria	Proteobacteria	Deltaproteobacteria	Desulfovibrionales	Desulfovibrionaceae	Desulfovibrio		0.000312592	0.000618467		8.07329e-05	0.000279667		0.000914725	0.000993587	0.00205772	0.00354389		0	0.00146927	0.000369038	0		0	0	0.000968549	0.000282371		0.000335643	0.00029532	0.000795716	0.00117066		0	0.000624374	0.000683193	0.000996927		0	0.00101464	0	0.000287042		0	0	0	0.000446307		0.000322932
Otu0014925	Bacteria	Proteobacteria	Deltaproteobacteria	Desulfobacterales	Desulfobulbaceae	Desulfobulbus		0.000667729	0.000895777		0.000285603	0.000517287		0.000869333	0	0.000932125	0.000702662		0.000380817	0.000956263	0.00083221	0.000524241		0.000618854	0.00081918	0.00119407	0.000655515		0.000801912	0.000589018	0.000706431	0.00117066		0.000385664	0.000285858	0.00140563	0		0.000397573	0.000600828	0.000390686	0.000823543		0.000359176	0.000782336	0.00058985	0.000446307		0
Otu0014934	Bacteria	Proteobacteria	Deltaproteobacteria	Desulfobacterales	Desulfobacteraceae	unclassified		6.86617e-05	0.000237851		0.00204499	0.00135275		0.000274647	0	0	0.000234221		0	0	0	0		0	0.000533632	0	0		0	0	0	0		0.00261941	0.000338516	0.000569602	0.00102386		0.00298172	0.000868552	0.000390686	0		0.00136407	0.00107285	0.000580845	0.000707324		0.00121477
Otu0014940	Bacteria	Proteobacteria	Deltaproteobacteria	Desulfobacterales	Desulfobacteraceae	unclassified		0.000381718	0.000474393		0.00117535	0.0014984		0.000581906	0.000373939	0.000193466	0.000234221		0.000299895	0.000262945	0	0		0.000309427	0	0.000283917	0		0.000335643	0.000589018	0	0		0.000889799	0.00201563	0.00150697	0.000655642		0	0.000600828	0.00184152	0.000411772		0.00130594	0.000272786	0.00186962	0.00273112		0.00250565
Otu0015055	Bacteria	Proteobacteria	Deltaproteobacteria	Desulfobacterales	Desulfobacteraceae	unclassified		0.000232331	0.000547844		0.000969431	0.000738173		0.000523734	0	0	0.000605835		0.000405589	0	0	0		0	0	0.000626233	0.000291108		0	0	0.000409913	0		0.000273772	0.000624374	0.0011392	0.00318258		0.000715709	0.000782057	0.000786832	0		0.00197104	0.00185518	0.00245947	0.00135104		0.000917205
Otu0015064	Bacteria	Proteobacteria	Deltaproteobacteria	Syntrophobacterales	Syntrophobacteraceae	unclassified		8.11283e-05	0.000281037		0.000994929	0.00144261		0	0	0.000353298	0.000702662		0	0	0	0		0	0	0	0.000291108		0.000324513	0	0.000385802	0		0	0	0.000974118	0.00208948		0.000675714	0.000240822	0.000725416	0.00108158		0.0021163	0.000544422	0.00121306	0.00157749		0.0011877
Otu0015104	Bacteria	Proteobacteria	Deltaproteobacteria	Desulfobacterales	Desulfobacteraceae	unclassified		8.11283e-05	0.000281037		0.00158255	0.00142016		0	0	0	0		0	0.000262945	0	0		0	0	0	0.000373144		0.000324513	0	0	0		0.00131887	0.000338516	0.000278677	0		0.00216685	0.00062773	0.000390686	0.000794539		0.000932263	0.00212854	0.000294925	0.00145027		0.00191222
Otu0015114	Bacteria	Proteobacteria	Deltaproteobacteria	Desulfovibrionales	Desulfovibrionaceae	Desulfovibrio		0	0		8.44643e-05	0.000292593		0	0.000326509	0.000545194	0.00139534		0	0.000333774	0	0.000399441		0	0	0	0		0	0	0	0		0	0.000624374	0	0.00261515		0.000337857	0.000300414	0	0		0	0.000255062	0.000294925	0		0
Otu0015252	Bacteria	Proteobacteria	Deltaproteobacteria	Syntrophobacterales	Syntrophobacterales_unclassified	unclassified		9.52043e-05	0.000329797		0.000968467	0.00114096		0	0	0	0		0.000380817	0	0	0		0	0	0	0		0	0	0	0		0.000933207	0.00170498	0.000860527	0.0016795		0.000715709	0.00144248	0.00144537	0.000698814		0.0003398	0.00163442	0.00125542	0.00193115		0.00188515
Otu0015272	Bacteria	Proteobacteria	Deltaproteobacteria	Desulfobacterales	Desulfobacteraceae	unclassified		0.000143879	0.000336387		0.00127145	0.00122341		0	0.00128672	0.000545194	0.000328194		0.000299895	0	0.00030806	0		0.000275621	0.000266816	0.000286261	0.000373144		0	0	0.000296518	0		0.000273772	0	0.00183464	0.000682571		0.00149113	0	0.00117206	0.000382768		0.00240285	0.000255062	0.000623206	0.000643716		0.000918053
Otu0015604	Bacteria	Proteobacteria	Deltaproteobacteria	Desulfovibrionales	Desulfovibrionaceae	Desulfovibrio		0.00028658	0.000424064		0.000175196	0.000410675		0.000274647	0.000619648	0.00163872	0.000277641		0	0.00102709	0.00166442	0.000399441		0.000871673	0.00041625	0.000626233	0.000282371		0	0.000884338	0.000795716	0		0	0.00096289	0.000569602	0.000375633		0.000377852	0.000386909	0.000396146	0.000382768		0	0.000272211	0.000285919	0		0.000322932
Otu0015719	Bacteria	Proteobacteria	Deltaproteobacteria	Desulfobacterales	Desulfobacteraceae	unclassified		0.000310496	0.000464758		0.000390104	0.000800456		0.000274647	0	0	0.000234221		0.000680712	0.000346659	0.00030806	0.000331866		0.000286625	0.000305527	0	0		0	0	0.000409913	0.000349886		0	0	0.000860527	0.00102386		0.000377852	0	0.000725416	0		0.000859631	0.0010557	0.000294925	0.000446307		0.000322932
Otu0015721	Bacteria	Proteobacteria	Deltaproteobacteria	Desulfobacterales	Desulfobacteraceae	unclassified		7.49738e-05	0.000259717		0.000693589	0.000820599		0	0	0	0		0.000299895	0	0.000369038	0		0	0	0	0		0	0.000293699	0	0		0	0.00184526	0.00112696	0.00174819		0.00149113	0	0.000725416	0		0.0003398	0.000545572	0.000960492	0.00135104		0.000943424
Otu0015763	Bacteria	Proteobacteria	Deltaproteobacteria	Desulfobacterales	Desulfobacteraceae	unclassified		0.00079944	0.000864965		7.41782e-05	0.000256961		0.000594686	0.00206798	0.000896923	0.0011177		0.00116722	0.000609604	0.000677098	0.000399441		0.000309427	0.0013141	0	0		0.00112642	0.000333247	0.00068232	0.000820775		0	0.000987686	0.000683193	0		0	0.000300414	0.00032927	0.000411772		0	0	0	0		0.000296713
Otu0015823	Bacteria	Proteobacteria	Deltaproteobacteria	Desulfovibrionales	Desulfovibrionaceae	Desulfovibrio		0.00057568	0.000956442		0.000312541	0.000599633		0	0.000293138	0.000932125	0.00289891		0.00116722	0.000680433	0.000369038	0		0.0011355	0.000877871	0.00211593	0.000373144		0	0.000293699	0.000296518	0		0	0.00124875	0.00321328	0.00312075		0	0	0	0.000698814		0.000359176	0.000527273	0.000674573	0.000353662		0.000890987
Otu0015829	Bacteria	Proteobacteria	Deltaproteobacteria	Desulfobacterales	Desulfobacteraceae	unclassified		0	0		0.0008067	0.000898116		0	0	0.000353298	0		0	0	0	0		0	0	0	0.000282371		0	0	0	0		0.000342256	0.000975288	0.00106321	0.000341285		0.000397573	0.0012637	0.00032927	0.000382768		0.000626343	0.00267296	0.00184527	0.00157749		0.00186063
Otu0015986	Bacteria	Proteobacteria	Deltaproteobacteria	Syntrophobacterales	Syntrophobacteraceae	Syntrophobacter		0.000626989	0.000727985		0.00179857	0.00166418		0.000869333	0	0	0		0.000680712	0	0	0.000331866		0.000286625	0.000208125	0.000570178	0		0.000671285	0	0	0.000492426		0.000342256	0.00096289	0.00115145	0.000655642		0.00361799	0.00084165	0.00118298	0		0.00229146	0.00132791	0.00174253	0.000580109		0.000942576
Otu0016036	Bacteria	Proteobacteria	Deltaproteobacteria	Desulfovibrionales	Desulfovibrionaceae	Desulfovibrio		0	0		0.000159954	0.000374665		0	0	0.00140848	0.00373184		0	0.000262945	0	0.000331866		0	0	0.000342316	0.000373144		0	0.000293699	0	0		0.000342256	0	0.00163281	0.00839227		0	0	0	0		0	0.000272786	0.000337286	0		0.000297561
Otu0016040	Bacteria	Proteobacteria	Deltaproteobacteria	Desulfobacterales	Desulfobacteraceae	Desulfofaba		0.000221236	0.000400851		0.000720828	0.00100263		0	0	0.000193466	0.000468441		0.000299895	0	0	0		0.000585048	0	0	0		0	0	0	0		0.000958284	0.00196297	0.00150697	0.00146819		0.000675714	0.000240822	0	0		0.000359176	0.000510125	0.00121306	0.000580109		0.000890139
Otu0016161	Bacteria	Proteobacteria	Deltaproteobacteria	Desulfovibrionales	Desulfovibrionaceae	Desulfovibrio		0.000185308	0.000435092		7.41782e-05	0.000256961		0	0.000619648	0.000546764	0.00280494		0.000405589	0	0	0		0	0.000266816	0.000283917	0.0010374		0.000335643	0.000587397	0	0		0	0	0.00115145	0.000280009		0	0	0	0		0	0.000544997	0	0.000290054		0.000296713
Otu0016183	Bacteria	Proteobacteria	Deltaproteobacteria	Desulfobacterales	Desulfobacteraceae	unclassified		0	0		0.00103664	0.000987155		0	0	0	0.000277641		0	0	0	0.000331866		0	0	0.000283917	0		0	0.000333247	0	0		0.00159264	0.00158726	0.00154372	0.00195951		0.000397573	0.000481643	0.00032927	0.000574084		0.00064572	0.00129303	0.00147463	0.000707324		0.00151063
Otu0016223	Bacteria	Proteobacteria	Deltaproteobacteria	Desulfobacterales	Desulfobacteraceae	unclassified		0	0		0.00179643	0.00153943		0	0.000326509	0.000193466	0		0	0	0	0		0	0	0.000286261	0		0	0	0	0		0.000958284	0.00126115	0.000949621	0.000560017		0.00188871	0.000901242	0	0		0.00277653	0.000272211	0.000623206	0		0.00156222
Otu0016349	Bacteria	Proteobacteria	Deltaproteobacteria	Desulfobacterales	Desulfobacteraceae	unclassified		0.000140441	0.000328899		0.00159353	0.00118874		0.000261867	0	0.000353298	0.000234221		0.000299895	0	0	0		0	0	0	0.000282371		0	0	0	0		0.00184808	0.00161206	0.00150697	0.00140691		0.00224629	0.000240822	0	0		0.00103878	0.00103797	0.000294925	0.000353662		0.00124098
Otu0016435	Bacteria	Proteobacteria	Deltaproteobacteria	Syntrophobacterales	Syntrophobacteraceae	Syntrophobacter		0.000137323	0.000475702		0.000860817	0.00088763		0.000549294	0	0	0		0	0	0.00030806	0.000331866		0	0.000305527	0.000626233	0.000373144		0	0	0	0.000349886		0.00189149	0	0.000392268	0.0020282		0.000337857	0.000722465	0	0.000382768		0	0.000527848	0.000909125	0.00106099		0.00121392
Otu0016479	Bacteria	Proteobacteria	Deltaproteobacteria	Syntrophobacterales	Syntrophaceae	Desulfomonile		0.000798153	0.0006749		0.000778207	0.00120222		0.00107303	0.000373939	0.000351729	0.000234221		0.000980607	0.00120632	0	0.000524241		0.000871673	0	0.000626233	0.000291108		0.000267304	0	0.00111634	0.000349886		0.00109509	0.00130141	0	0		0.000377852	0.000300414	0	0.000287042		0.0010194	0.000544997	0	0.000580109		0.000620492
Otu0016614	Bacteria	Proteobacteria	Deltaproteobacteria	Desulfobacterales	Desulfobacteraceae	unclassified		0.000400592	0.00066042		0.000459713	0.00059847		0.000274647	0.000960216	0.000546764	0.00116112		0.000380817	0.000262945	0.000785143	0.000331866		0.000275621	0.000305527	0.000856439	0.00102866		0.000671285	0.00192201	0.000593035	0		0.000547543	0	0.00135414	0.000341285		0.000337857	0.000300414	0.000781372	0		0.000359176	0.00156525	0.00125542	0.000707324		0.000594274
Otu0016670	Bacteria	Proteobacteria	Deltaproteobacteria	Desulfobacterales	Desulfobulbaceae	Desulfocapsa		0.000668515	0.000896541		0.000614724	0.000785583		0.00114398	0	0.000703457	0.00130136		0.000405589	0.000262945	0.00140126	0.000524241		0.00112449	0.000832501	0.000567835	0		0	0	0.00118607	0		0.000933207	0.000857574	0	0		0	0	0.00111064	0.000382768		0.000932263	0.000545572	0	0.000353662		0.000593426
Otu0016695	Bacteria	Proteobacteria	Deltaproteobacteria	Syntrophobacterales	Syntrophobacterales_unclassified	unclassified		7.49738e-05	0.000259717		0.000682717	0.000671465		0	0	0.000193466	0		0.000299895	0.000346659	0	0.000399441		0	0.000513653	0	0.000664252		0	0.00029532	0.000409913	0.000349886		0.00100169	0.000975288	0.000290925	0.00143384		0.00107329	0.00114206	0.0011161	0.000382768		0.000359176	0.000817783	0.00126442	0.00295756		0.000296713
Otu0016758	Bacteria	Proteobacteria	Deltaproteobacteria	Desulfobacterales	Desulfobacteraceae	Desulforegula		6.54667e-05	0.000226783		9.6416e-05	0.000333995		0.000261867	0.000879415	0.00105519	0.00350332		0	0	0	0		0	0	0.000572521	0.000282371		0	0	0	0		0.000385664	0.00228909	0.00347885	0.00165257		0	0.000300414	0	0		0	0	0.00153233	0.00115363		0
Otu0016856	Bacteria	Proteobacteria	Deltaproteobacteria	Desulfobacterales	Desulfobacteraceae	Desulfofaba		0.000276611	0.000503567		0.0011338	0.00121283		0.000320039	0	0	0		0.000786406	0	0	0		0	0	0	0.000291108		0	0.000333247	0	0		0.000547543	0.000350914	0.0018224	0.000621294		0.00180927	0.000541236	0.0011161	0		0.000912887	0.00107285	0.00148997	0.00122382		0.00126551
Otu0016964	Bacteria	Proteobacteria	Deltaproteobacteria	Syntrophobacterales	Syntrophobacteraceae	unclassified		0.00022045	0.000400596		0.000764511	0.000981328		0.000581906	0	0	0.000328194		0.000299895	0	0	0		0	0	0.000684631	0		0	0.000333247	0	0.000699773		0	0.00068943	0.00096187	0.000716919		0.00109356	0.00198371	0.0018306	0.000794539		0.000698976	0.00240075	0.00087577	0.00167013		0.00126551
Otu0017161	Bacteria	Proteobacteria	Deltaproteobacteria	Desulfobacterales	Desulfobacteraceae	unclassified		9.52043e-05	0.000329797		0.00102505	0.000771809		0	0	0	0.000511862		0.000380817	0	0	0		0	0.000208125	0	0.000373144		0	0.00029532	0	0		0.000889799	0.00195058	0.000949621	0.00180947		0.000735431	0.000300414	0.000390686	0.000287042		0.00155861	0.000782336	0.000623206	0.000446307		0.000916358
Otu0017162	Bacteria	Proteobacteria	Deltaproteobacteria	Syntrophobacterales	Syntrophobacteraceae	unclassified		8.39107e-05	0.000290675		0.00075698	0.00102393		0	0	0.000351729	0.000234221		0	0.000596719	0	0		0	0.000305527	0.000283917	0		0.000335643	0.000293699	0.00109223	0.000492426		0.000342256	0	0.000278677	0.00164515		0.000397573	0.00137465	0.00104923	0.000698814		0.00139795	0.000817783	0.00145661	0.00169258		0.000890139
Otu0017166	Bacteria	Proteobacteria	Deltaproteobacteria	Desulfobacterales	Desulfobacteraceae	unclassified		0.00021782	0.000529776		0.00187118	0.00128707		0.000320039	0.000373939	0.000353298	0		0	0	0	0		0.000551242	0	0.000283917	0		0	0.000293699	0	0		0.00266282	0.000285858	0.00153147	0		0.00300199	0.000240822	0.000396146	0		0.00119943	0.00158354	0.00173353	0.00138008		0.000620492
Otu0017245	Bacteria	Proteobacteria	Deltaproteobacteria	Desulfobacterales	Desulfobacteraceae	unclassified		8.11283e-05	0.000281037		0.000549209	0.000782762		0	0	0	0.000328194		0	0.000346659	0	0		0	0.000305527	0.000342316	0.000282371		0.000324513	0	0	0		0.000273772	0.00276789	0.00096187	0.00093565		0.000755704	0.00110937	0	0		0.000573087	0.00216341	0.000580845	0.000643716		0.000594274
Otu0017273	Bacteria	Proteobacteria	Deltaproteobacteria	Desulfobacterales	Desulfobacteraceae	unclassified		0.000160671	0.000382882		0.0010411	0.00101985		0.000261867	0	0.000353298	0		0.000380817	0	0.000369038	0.000399441		0	0	0	0		0	0	0.000385802	0		0.000342256	0.00149435	0.00173416	0.00124259		0.00218657	0.000928144	0	0		0.000718352	0.00078291	0.00058985	0.00144369		0.000917205
Otu0017355	Bacteria	Proteobacteria	Deltaproteobacteria	Desulfovibrionales	Desulfovibrionaceae	Desulfovibrio		0.000341759	0.00055044		0.00022317	0.000773085		0.000261867	0.00104102	0.00141005	0.00592381		0	0.000346659	0.00030806	0		0.000837867	0.000533632	0.000570178	0		0.000267304	0	0	0		0	0.00126115	0.00134189	0.00317517		0	0.000240822	0.00032927	0		0	0.000272786	0.000337286	0.000290054		0.000892682
Otu0017513	Bacteria	Proteobacteria	Deltaproteobacteria	Desulfobacterales	Desulfobacteraceae	unclassified		6.54667e-05	0.000226783		0.00043214	0.000676914		0.000261867	0.000293138	0	0.000277641		0	0	0	0		0	0	0	0		0	0	0	0		0.000385664	0.00120849	0.0018224	0.00255387		0.000337857	0	0.000719956	0.000411772		0.000359176	0.000272786	0.000337286	0.000643716		0.000645863
Otu0017515	Bacteria	Proteobacteria	Deltaproteobacteria	Desulfobacterales	Desulfobacteraceae	unclassified		8.11283e-05	0.000281037		0.00113385	0.000929213		0	0	0	0		0	0	0	0		0	0	0	0		0.000324513	0	0.000385802	0		0.00200338	0.000857574	0.00153147	0.000280009		0.000675714	0.000687323	0.00065854	0.000287042		0.000912887	0.000510125	0.00121306	0.00122382		0.000943424
Otu0017567	Bacteria	Proteobacteria	Deltaproteobacteria	Desulfobacterales	Desulfobacteraceae	Desulfofaba		0	0		0.00030728	0.000614411		0	0	0	0		0	0	0	0		0	0	0.000286261	0		0	0.000333247	0	0		0	0.00278335	0.000569602	0.00127694		0	0	0	0		0.000286544	0.00107285	0.00283912	0.000707324		0.000942576
Otu0017736	Bacteria	Proteobacteria	Deltaproteobacteria	Desulfobacterales	Desulfobacteraceae	unclassified		6.89052e-05	0.000238695		0.00180958	0.00142769		0	0	0	0		0	0.000333774	0	0		0.000275621	0	0	0		0	0	0	0		0.00214035	0	0	0.000341285		0.00157057	0.00062773	0	0		0.0013447	0.000272786	0.00058985	0		0.00218271
Otu0017770	Bacteria	Proteobacteria	Deltaproteobacteria	Desulfobacterales	Desulfobacteraceae	unclassified		7.49738e-05	0.000259717		0.000514813	0.000829348		0	0	0	0.000277641		0.000299895	0	0	0		0	0	0.000342316	0.000564742		0	0.000293699	0.00068232	0		0.000342256	0.000624374	0.00183464	0.0016795		0.000675714	0.00108247	0.000792293	0		0.000718352	0.000545572	0.000580845	0.00093377		0.000322932
Otu0017910	Bacteria	Proteobacteria	Deltaproteobacteria	Desulfobacterales	Desulfobacteraceae	unclassified		8.00097e-05	0.000277162		0.00148656	0.00135718		0.000320039	0	0.000193466	0		0	0.000262945	0.00061612	0		0	0.000208125	0	0.000655515		0	0	0	0.000349886		0.000889799	0.00161206	0.00219017	0.000751267		0.00194842	0.000481643	0	0.000411772		0.00191778	0.00103797	0.000580845	0.000997378		0.00119024
Otu0017966	Bacteria	Proteobacteria	Deltaproteobacteria	Syntrophobacterales	Syntrophaceae	Desulfomonile		0	0		0.00142279	0.000989173		0	0	0	0		0	0	0	0		0	0	0.000283917	0		0	0	0	0		0.0010451	0.000285858	0.000569602	0.000901302		0.00180927	0.00194278	0.00065854	0.000794539		0.00132532	0.000272786	0.00144761	0.00122382		0.00151148
Otu0018187	Bacteria	Proteobacteria	Deltaproteobacteria	Desulfobacterales	Desulfobulbaceae	Desulfocapsa		0.000769343	0.0008875		0	0		0.00149663	0	0.00124865	0.00107428		0.000980607	0.00134798	0.00103223	0.000399441		0.000275621	0.000305527	0.000572521	0.000291108		0.000324513	0.000333247	0.000296518	0		0	0	0.000670944	0		0	0.000928144	0	0		0	0.000527273	0	0.000290054		0
Otu0018291	Bacteria	Proteobacteria	Deltaproteobacteria	Syntrophobacterales	Syntrophobacterales_unclassified	unclassified		0.000789387	0.00117194		7.41782e-05	0.000256961		0.000274647	0.000326509	0	0.000277641		0.000405589	0.000943378	0	0.000856107		0.000275621	0.000832501	0.0012011	0.000937886		0.00220169	0.000626945	0.000819827	0.000349886		0	0	0.000949621	0.000560017		0	0	0	0		0	0	0	0		0.000296713
Otu0018461	Bacteria	Proteobacteria	Deltaproteobacteria	Desulfobacterales	Desulfobacteraceae	unclassified		0.000224192	0.000407146		0.000333598	0.000494423		0.000320039	0	0.000580397	0.000702662		0	0.000346659	0.00030806	0		0.000309427	0.000533632	0.00102695	0		0.000267304	0.000885959	0.000296518	0		0	0.00068943	0.00125279	0.0011269		0.000337857	0.000687323	0.000390686	0		0.000698976	0.000255062	0.000285919	0.000290054		0.000297561
Otu0018585	Bacteria	Proteobacteria	Deltaproteobacteria	Desulfobacterales	Desulfobacteraceae	unclassified		0.000623733	0.000626483		0.000410066	0.000517795		0	0.000960216	0.000703457	0.000840056		0.000680712	0	0	0		0.000562246	0	0.000342316	0.00124647		0.00125197	0	0.00068232	0.000349886		0.000659436	0	0.000290925	0		0.000397573	0.000386909	0.000390686	0		0.000286544	0	0.000285919	0.00337483		0.000296713
Otu0019056	Bacteria	Proteobacteria	Deltaproteobacteria	Desulfobacterales	Desulfobacteraceae	unclassified		0.000145476	0.000341791		0.000931437	0.000922543		0.000581906	0	0.000740229	0		0	0	0	0		0	0	0	0		0	0	0	0		0.000889799	0.00096289	0.000290925	0.000621294		0.000377852	0.000386909	0.00032927	0		0.00121881	0.000545572	0.00119504	0		0.00123929
Otu0019077	Bacteria	Proteobacteria	Deltaproteobacteria	Desulfobacterales	Desulfobacteraceae	Desulfosalsimonas		6.6826e-05	0.000231492		0.000495168	0.000648221		0	0.000373939	0	0.000234221		0	0.000262945	0	0		0	0.000208125	0	0		0.000267304	0	0.000889553	0.000410388		0.000342256	0	0.000569602	0.000560017		0.000397573	0.000782057	0.00032927	0.000698814		0.00064572	0.000527273	0.00201945	0.00106099		0.000595121
Otu0019173	Bacteria	Proteobacteria	Deltaproteobacteria	Syntrophobacterales	Syntrophobacteraceae	unclassified		0.000764757	0.000926235		7.16359e-05	0.000248154		0.000785601	0	0.000193466	0.000468441		0.000786406	0.000609604	0	0.000331866		0.000826863	0.000741758	0	0		0.000660156	0	0.00127536	0		0	0.000285858	0	0		0	0	0	0		0.000286544	0.000510125	0	0		0
Otu0020022	Bacteria	Proteobacteria	Deltaproteobacteria	Syntrophobacterales	Syntrophobacteraceae	Desulfovirga		0.000150737	0.000354748		0.00115777	0.00112583		0	0	0	0		0	0	0	0		0	0.000474941	0.000342316	0		0.000602947	0.000628566	0	0		0.00120698	0.00092263	0	0.000621294		0.00190843	0.000541236	0.000719956	0.000574084		0.000573087	0.00134563	0	0.00093377		0.000942576
Otu0020158	Bacteria	Proteobacteria	Deltaproteobacteria	Syntrophobacterales	Syntrophobacteraceae	unclassified		0	0		0.000292052	0.000682232		0	0	0	0		0	0	0	0		0	0	0	0		0	0	0	0		0	0	0.000569602	0.000280009		0	0	0.00111064	0.0011483		0.000573087	0.000818357	0.000294925	0		0.000595121
Otu0020223	Bacteria	Proteobacteria	Deltaproteobacteria	Syntrophobacterales	Syntrophaceae	Desulfomonile		0	0		0.000323501	0.00048402		0	0	0.000386931	0		0	0.000262945	0.00030806	0.000524241		0	0	0.000286261	0		0	0	0	0.000349886		0.000659436	0.00183286	0.00198748	0.000560017		0.000337857	0	0	0.000411772		0	0.00107227	0.000960492	0.000290054		0.000296713
Otu0020320	Bacteria	Proteobacteria	Deltaproteobacteria	Syntrophobacterales	Syntrophaceae	Desulfomonile		0	0		0.000175196	0.000410675		0	0.000960216	0	0		0	0	0.00030806	0		0	0	0	0		0	0.00029532	0	0		0	0.000338516	0.00143013	0.00149567		0.000377852	0.000928144	0.00098781	0.000411772		0	0.00105455	0.000337286	0.000870163		0.000322932
Otu0020326	Bacteria	Proteobacteria	Deltaproteobacteria	Syntrophobacterales	Syntrophobacteraceae	Syntrophobacter		0.000261867	0.000907134		0.000414471	0.000642544		0.00104747	0	0.000351729	0		0	0	0.00030806	0.000331866		0	0.000305527	0	0		0	0.00029532	0	0		0.000342256	0.00208069	0.00156907	0		0.000397573	0.000240822	0	0.000698814		0	0.000255062	0.000285919	0.000997378		0.000918053
Otu0020465	Bacteria	Proteobacteria	Deltaproteobacteria	Desulfobacterales	Desulfobulbaceae	Desulfocapsa		0.000343193	0.000706758		0.000707386	0.000787501		0	0	0.000193466	0		0.000761635	0.000346659	0.00110711	0		0.000286625	0	0	0		0.000324513	0.000628566	0	0.000820775		0.000616028	0.000857574	0.00058185	0.000621294		0.000337857	0.000386909	0.000786832	0.000382768		0.000985519	0	0	0.000799969		0.000890139
Otu0020709	Bacteria	Proteobacteria	Deltaproteobacteria	Desulfobacterales	Desulfobacteraceae	Desulfobacula		0.000511677	0.000709087		0.000639201	0.00112526		0.000811161	0	0	0.000511862		0.000299895	0.000333774	0	0.000524241		0.000286625	0	0.000628576	0.000291108		0.000649026	0.000628566	0.000409913	0		0	0.000350914	0.000569602	0.00171385		0	0.000300414	0	0.000574084		0.00193716	0.00078291	0.0011707	0.000643716		0.000619645
Otu0021285	Bacteria	Proteobacteria	Deltaproteobacteria	Desulfobacterales	Desulfobacteraceae	unclassified		6.86617e-05	0.000237851		0.0013498	0.00179192		0.000274647	0	0	0		0	0	0	0		0	0.000208125	0	0.000291108		0	0	0	0		0.00232731	0.000987686	0.000278677	0.000560017		0.000397573	0.000541236	0.000786832	0.000287042		0.00175713	0.00134448	0.000857758	0.000290054		0.000917205
Otu0021676	Bacteria	Proteobacteria	Deltaproteobacteria	Desulfobacterales	Desulfobacteraceae	unclassified		6.89052e-05	0.000238695		8.5564e-05	0.000296402		0	0.000293138	0.00109353	0.000234221		0	0.000667548	0	0		0.000275621	0	0.000342316	0.00114696		0	0	0	0		0.000342256	0.000857574	0.00145548	0		0	0	0	0		0	0.000255062	0.00087577	0.0022212		0
Otu0022370	Bacteria	Proteobacteria	Deltaproteobacteria	Syntrophobacterales	Syntrophaceae	Desulfomonile		0	0		0.000920731	0.00126222		0	0	0	0		0	0	0	0		0	0	0	0		0	0	0.000296518	0		0.000659436	0.000636772	0.000290925	0.00131128		0.00210713	0.00084165	0.000396146	0		0	0.00108999	0.00119504	0.000353662		0.000916358
Otu0022495	Bacteria	Proteobacteria	Deltaproteobacteria	Desulfobacterales	Desulfobacteraceae	unclassified		0.000235645	0.000433323		9.6416e-05	0.000333995		0.000261867	0	0.000353298	0.000234221		0.000680712	0	0	0		0	0.000266816	0	0.000582216		0	0	0	0		0.000385664	0	0.00083603	0.00199385		0	0.000300414	0	0.000382768		0	0.00103797	0.000580845	0.000643716		0
Otu0023791	Bacteria	Proteobacteria	Deltaproteobacteria	Syntrophobacterales	Syntrophobacteraceae	Desulfovirga		0.000307989	0.000580842		0.000562325	0.000901856		0	0.000619648	0	0		0.000680712	0	0	0		0.000551242	0	0	0.000291108		0	0	0	0		0.000273772	0.00231695	0.000278677	0.000560017		0.00139142	0.000901242	0	0		0.000286544	0.000272211	0.000285919	0.00093377		0.000297561
								3.07569			4.42697
														2.99254	2.67437	3.10237	4.01675		2.86247	3.12305	3.13743	3.01897		3.09653	3.09099	3.45193	4.02433		3.35123	3.00798	3.26612	3.32994		3.95379	4.3264	5.44732	6.15137		4.40455	4.25418	3.85512	3.41423		4.54089	5.11577	5.10666	4.52355		4.80865
														3.07569																				4.42697
[truncated: 51 more columns]
