# Supplementary material for: The Active Sulfate-Reducing Microbial Community in Littoral Sediment of Oligotrophic Lake Constance
Source: Front Microbiol. 2019 Feb 13;10:247. doi: 10.3389/fmicb.2019.00247 (PMC6381063; doi:10.3389/fmicb.2019.00247)
Supplement: TABLE S3 — Overview of strongly positive (logFC > 2) and significant (FDR-corrected p-value < 0.05) relative abundance changes among 16S rRNA (gene) OTUs affiliated to recognized SRM lineages in the treatments “chitin & sulfate” or “sulfate only” as compared to the initial community and the respective methanogenic treatments over time. [file Table_3.XLSX]

## Sheet: Significantly responding OTUs
							logFC value of significantly				logFC value of significantly				logFC value of significantly				logFC value of significantly
							responding OTUs				responding OTUs				responding OTUs				responding OTUs
							DNA_Chitin & sulfate				DNA_Sulfate only				RNA_Chitin & sulfate				RNA_Sulfate only
OTU	Domain	Phylum	Class	Order	Family	Genus	9 days	21 days	43 days		9 days	21 days	43 days		9 days	21 days	43 days		9 days	21 days	43 days
Otu0009827	Bacteria	Proteobacteria	Deltaproteobacteria	Desulfobacterales	Desulfobacteraceae	Desulfatiferula	-	-	-		-	-	-		-	2.88	3.79		-	-	-
Otu0008516	Bacteria	Proteobacteria	Deltaproteobacteria	Desulfobacterales	Desulfobacteraceae	Desulforegula	-	-	-		-	-	-		-	-	2.95		-	-	-
Otu0011601	Bacteria	Proteobacteria	Deltaproteobacteria	Desulfobacterales	Desulfobacteraceae	Desulforegula	-	-	-		-	-	-		3.4	-	2.91		-	-	-
Otu0004097	Bacteria	Proteobacteria	Deltaproteobacteria	Desulfobacterales	Desulfobacteraceae	unclassified	-	-	-		-	-	-		-	-	2.38		-	-	-
Otu0004135	Bacteria	Proteobacteria	Deltaproteobacteria	Desulfobacterales	Desulfobacteraceae	unclassified	-	-	-		-	-	-		-	-	2.77		-	-	-
Otu0007324	Bacteria	Proteobacteria	Deltaproteobacteria	Desulfobacterales	Desulfobacteraceae	unclassified	-	-	-		-	-	-		-	-	2.86		-	-	-
Otu0007814	Bacteria	Proteobacteria	Deltaproteobacteria	Desulfobacterales	Desulfobacteraceae	unclassified	-	-	-		-	-	-		-	-	2.15		-	-	-
Otu0012606	Bacteria	Proteobacteria	Deltaproteobacteria	Desulfobacterales	Desulfobacteraceae	unclassified	-	-	-		-	-	-		-	-	2.44		-	-	-
Otu0002092	Bacteria	Proteobacteria	Deltaproteobacteria	Desulfobacterales	Desulfobulbaceae	Desulfobulbus	-	-	2.84		-	-	-		-	-	2.82		-	-	-
Otu0001547	Bacteria	Proteobacteria	Deltaproteobacteria	Desulfobacterales	Desulfobulbaceae	Desulfocapsa	-	-	2.56		-	-	-		-	-	2.31		-	-	-
Otu0002613	Bacteria	Proteobacteria	Deltaproteobacteria	Desulfobacterales	Desulfobulbaceae	Desulfocapsa	-	2.62	-		-	-	-		2.39	-	-		-	-	-
Otu0002336	Bacteria	Proteobacteria	Deltaproteobacteria	Desulfovibrionales	Desulfomicrobiaceae	Desulfomicrobium	-	-	3.17		-	-	-		-	-	-		-	-	-
Otu0005580	Bacteria	Proteobacteria	Deltaproteobacteria	Desulfovibrionales	Desulfomicrobiaceae	Desulfomicrobium	-	-	4.16		-	-	-		-	-	3.22		-	-	-
Otu0003073	Bacteria	Proteobacteria	Deltaproteobacteria	Desulfovibrionales	Desulfovibrionaceae	Desulfovibrio	-	3.43	4.6		-	-	-		-	-	3.89		-	-	-
Otu0005878	Bacteria	Proteobacteria	Deltaproteobacteria	Desulfovibrionales	Desulfovibrionaceae	Desulfovibrio	-	-	4.14		-	-	-		-	-	3.25		-	-	-
Otu0007414	Bacteria	Proteobacteria	Deltaproteobacteria	Desulfovibrionales	Desulfovibrionaceae	Desulfovibrio	-	2.01	2.42		-	-	-		-	-	3.61		-	-	-
Otu0008922	Bacteria	Proteobacteria	Deltaproteobacteria	Desulfovibrionales	Desulfovibrionaceae	Desulfovibrio	-	-	3.06		-	-	-		-	-	-		-	-	-
Otu0009115	Bacteria	Proteobacteria	Deltaproteobacteria	Desulfovibrionales	Desulfovibrionaceae	Desulfovibrio	-	-	4.12		-	-	-		-	-	-		-	-	-
Otu0010379	Bacteria	Proteobacteria	Deltaproteobacteria	Desulfovibrionales	Desulfovibrionaceae	Desulfovibrio	-	-	2.59		-	-	-		-	-	-		-	-	-
Otu0012243	Bacteria	Proteobacteria	Deltaproteobacteria	Desulfovibrionales	Desulfovibrionaceae	Desulfovibrio	-	-	2.7		-	-	-		-	-	2.51		-	-	-
Otu0013052	Bacteria	Proteobacteria	Deltaproteobacteria	Desulfovibrionales	Desulfovibrionaceae	Desulfovibrio	-	-	-		-	-	-		-	-	3.02		-	-	-
Otu0016036	Bacteria	Proteobacteria	Deltaproteobacteria	Desulfovibrionales	Desulfovibrionaceae	Desulfovibrio	-	-	-		-	-	-		-	-	2.84		-	-	-
Otu0017355	Bacteria	Proteobacteria	Deltaproteobacteria	Desulfovibrionales	Desulfovibrionaceae	Desulfovibrio	-	-	-		-	-	-		-	-	2.59		-	-	-
Otu0006742	Bacteria	Proteobacteria	Deltaproteobacteria	Desulfovibrionales	Desulfovibrionaceae	unclassified	-	-	-		-	-	-		-	-	3.09		-	-	-
Otu0010042	Bacteria	Proteobacteria	Deltaproteobacteria	Desulfovibrionales	Desulfovibrionaceae	unclassified	-	-	-		-	-	-		-	-	2.62		-	-	-
Otu0010181	Bacteria	Proteobacteria	Deltaproteobacteria	Desulfovibrionales	Desulfovibrionales_unclassified	unclassified	-	-	-		-	-	-		-	-	3.06		-	-	-
Otu0005598	Bacteria	Proteobacteria	Deltaproteobacteria	Syntrophobacterales	Syntrophaceae	Desulfobacca	-	-	-		-	-	-		-	-	2.13		-	-	-
Otu0000202	Bacteria	Proteobacteria	Deltaproteobacteria	Syntrophobacterales	Syntrophobacteraceae	Syntrophobacter	-	-	-		-	-	-		-	-	2.1		-	-	-
Otu0000830	Bacteria	Proteobacteria	Deltaproteobacteria	Syntrophobacterales	Syntrophobacteraceae	Syntrophobacter	-	-	-		-	-	-		-	-	2.51		-	-	-
Otu0001587	Bacteria	Proteobacteria	Deltaproteobacteria	Syntrophobacterales	Syntrophobacteraceae	Syntrophobacter	-	-	-		-	-	-		-	3.51			4.16	-	-
Otu0007098	Bacteria	Proteobacteria	Deltaproteobacteria	Syntrophobacterales	Syntrophobacteraceae	Syntrophobacter	-	-	-		-	-	-		-	-	2.24		-	-	-
Otu0006653	Bacteria	Proteobacteria	Deltaproteobacteria	Syntrophobacterales	Syntrophobacteraceae	unclassified	-	-	-		-	-	-		2.56	-			-	-	-
